# Supplementary material for: Integrative analysis to screen novel pyroptosis-related LncRNAs for predicting clinical outcome of glioma and validation in tumor tissue
Source: Aging (Albany NY). 2023 Mar 13;15(5):1628–51. doi: 10.18632/aging.204580 (PMC10042692; doi:10.18632/aging.204580)
Supplement: Supplementary Tables [file aging-15-204580-s002.xlsx]

## Sheet: Supplementary Table 1
Supplementary Table 1. The correlation 46 PRLs and 11pyroptosis regulator.
cor
ID	CASP1	CASP3	CASP4	CASP5	CASP8	GSDMB	GSDMC	GSDMD	GSDME	GZMA	GZMB
AC002553.2	-0.0682702	-0.0267039	-0.0980311	-0.0595629	-0.0632178	0.722838	-0.0737999	0.0249668	-0.0651163	-0.0976855	-0.0762272
AC004817.3	0.171981	0.101912	0.207656	0.143037	0.170413	-0.0459313	-0.0346715	0.180105	0.0255875	0.112938	0.70892
AC004847.1	0.549546	0.342563	0.715413	0.677222	0.616485	-0.0785985	-0.081915	0.431204	0.163197	0.537134	0.401894
AC005785.1	-0.0205043	-0.00394963	-0.0292019	-0.0336066	-0.0279304	0.725078	-0.0714222	0.170801	-0.0607961	-0.0445701	-0.0342993
AC006369.1	0.484616	0.218296	0.54098	0.381025	0.504417	-0.100598	0.043059	0.408119	0.135443	0.702007	0.371017
AC007038.1	-0.107196	-0.0978119	-0.145125	-0.0288535	-0.0544703	0.714521	-0.0530275	-0.0537577	-0.0138912	-0.0856621	-0.114128
AC015813.1	-0.0525346	0.0558017	-0.0636098	-0.0109497	0.00229285	0.732717	-0.033813	0.0871641	-0.00673306	-0.109908	-0.109388
AC015961.2	-0.213503	-0.182587	-0.231577	-0.150973	-0.222165	0.723874	-0.052457	-0.0593244	-0.1191	-0.138604	-0.12202
AC027682.4	-0.203424	-0.18311	-0.225626	-0.169347	-0.241536	0.71287	-0.0457838	-0.0792931	-0.124429	-0.178658	-0.124152
AC040162.3	-0.0551732	0.0197275	-0.0338722	-0.0322741	-0.0039732	0.744556	-0.0728331	0.142128	-0.0322344	-0.0636659	-0.0635899
AC069281.2	-0.0247283	-0.118402	-0.0579008	-0.00678124	-0.0219735	0.737123	0.0463273	0.131761	0.0501782	-0.0198441	-0.0406347
AC073869.1	-0.213563	-0.156415	-0.210491	-0.117726	-0.192682	0.76674	-0.0687332	-0.0696915	-0.129242	-0.15648	-0.122168
AC087672.2	0.595911	0.278584	0.701611	0.532637	0.548716	-0.110425	-0.0624893	0.446974	0.202854	0.540394	0.572003
AC087741.1	-0.111015	-0.196143	-0.12596	-0.0139787	-0.0998512	0.780231	0.0118606	-0.0686004	-0.041746	-0.0702922	-0.0748341
AC092809.4	-0.0557966	-0.089783	-0.0735632	-0.0644311	-0.112001	0.7069	-0.0605756	0.0201323	-0.091706	-0.0487583	-0.0589533
AC109460.3	-0.163505	-0.0684542	-0.135719	-0.081506	-0.0894302	0.702895	-0.110145	0.0184597	-0.039777	-0.107461	-0.107415
AC116049.1	0.62074	0.424632	0.71163	0.437243	0.52781	-0.183599	-0.125347	0.589843	0.112616	0.408926	0.359279
AC135048.4	-0.0496719	-0.0341641	-0.0382846	0.00678488	-0.0187175	0.73449	-0.0813596	0.0700017	0.0240409	-0.0775224	-0.0543814
AC145098.1	0.632123	0.307718	0.680274	0.724736	0.69673	0.00348338	-0.027909	0.469025	0.276205	0.577909	0.316972
AL008729.1	-0.186319	-0.0793586	-0.195228	-0.0892859	-0.143433	0.705707	-0.030291	-0.136958	-0.0518551	-0.156519	-0.123667
AL031705.1	-0.124806	-0.101008	-0.131934	-0.0805537	-0.0955012	0.70874	-0.0175431	0.0126402	-0.0638628	-0.0984073	-0.0920997
AL109811.1	-0.0462421	-0.0458825	-0.0716233	0.00275552	-0.026982	0.782762	-0.00292929	0.0147834	-0.0289706	-0.0736923	-0.0808667
AL138831.3	-0.158889	-0.0946651	-0.180534	-0.118792	-0.162565	0.707047	-0.0496433	-0.0422527	-0.074166	-0.153446	-0.115078
AL355987.4	-0.207991	-0.159665	-0.208583	-0.142592	-0.203647	0.768672	-0.0316503	-0.127105	-0.12759	-0.163168	-0.112657
AL450384.2	-0.29647	-0.32337	-0.348632	-0.207971	-0.325545	0.748001	0.0447777	-0.28195	-0.162842	-0.212432	-0.185756
AL512770.1	-0.127424	-0.123291	-0.118894	-0.0474823	-0.0866943	0.72129	-0.026837	-0.0747747	-0.0924319	-0.0636809	-0.0782705
AP002490.1	-0.189077	-0.148528	-0.22	-0.0962744	-0.186361	0.706804	-0.0472382	-0.156328	-0.062064	-0.217858	-0.167954
ARHGAP27P1.BPTFP1.KPNA2P3	-0.0710446	-0.134992	-0.074942	-0.00377466	-0.00820196	0.719598	-0.0581556	0.00370442	-0.0305812	0.0106114	-0.0335867
CARD8.AS1	0.673482	0.487645	0.779656	0.572649	0.641004	-0.125188	-0.0498905	0.547228	0.20059	0.585201	0.349944
CCDC18.AS1	-0.0247016	-0.128455	-0.0777222	0.0173168	0.0380592	0.701169	0.0878629	0.0125865	0.0792443	-0.0373641	-0.086913
CYTOR	0.614746	0.621909	0.700577	0.385621	0.517619	-0.154822	-0.150134	0.517376	0.153933	0.425645	0.338891
FAM13A.AS1	-0.273301	-0.326214	-0.312896	-0.166652	-0.257619	0.712813	0.025911	-0.249319	-0.142167	-0.161719	-0.157204
GUSBP11	-0.221083	-0.250258	-0.269944	-0.15088	-0.237306	0.728387	0.00606053	-0.115557	-0.0823253	-0.152145	-0.125474
HCP5	0.717439	0.363824	0.589852	0.461673	0.571746	-0.20592	0.00344766	0.618807	0.21381	0.500262	0.290985
LINC01146	0.62114	0.205855	0.603996	0.715569	0.538128	-0.0704882	-0.0275282	0.371322	0.217624	0.574165	0.327379
LINC01355	0.00750224	-0.0218174	-0.0460668	0.0492685	0.000438519	0.773979	-0.000433329	0.030343	-0.00511848	-0.0503971	-0.0845397
LINC01426	0.674809	0.515209	0.747924	0.471772	0.643581	-0.183444	-0.112325	0.614641	0.215912	0.522987	0.347188
LINC01504	0.673605	0.344171	0.748461	0.60331	0.671276	-0.0691572	-0.00990441	0.512253	0.305326	0.639632	0.33941
LINC01506	0.628149	0.25261	0.720962	0.582645	0.502002	-0.0992737	-0.0145363	0.433545	0.152823	0.568273	0.3201
PCED1B.AS1	0.718467	0.26409	0.775669	0.67467	0.61213	-0.132349	0.020593	0.486428	0.307189	0.609139	0.403587
PDXDC2P.NPIPB14P	-0.0277811	-0.00261779	-0.0249813	0.0273412	0.00217322	0.710763	-0.0571383	0.0555027	-0.0098174	-0.0223174	-0.0510542
PSMB8.AS1	0.755545	0.397724	0.65449	0.573342	0.604517	-0.148291	-0.00780632	0.618694	0.306661	0.570922	0.333116
RFPL3S	-0.0915874	-0.0722451	-0.0969464	-0.013994	-0.0751477	0.793807	-0.0528909	0.0138317	-0.0832802	-0.054095	-0.0525974
SLC25A25.AS1	-0.187341	-0.130126	-0.185668	-0.0836527	-0.140366	0.781391	-0.0616897	-0.0807729	-0.0889529	-0.147119	-0.116527
SSBP3.AS1	-0.212897	-0.250533	-0.251474	-0.128551	-0.247104	0.738069	0.0701044	-0.21227	-0.0891597	-0.196734	-0.151094
USP30.AS1	0.738958	0.23922	0.627295	0.592605	0.5956	-0.149424	0.0165418	0.569508	0.185801	0.576655	0.346097
pvalue
ID	CASP1	CASP3	CASP4	CASP5	CASP8	GSDMB	GSDMC	GSDMD	GSDME	GZMA	GZMB
AC002553.2	0.0714593	0.481202	0.00955434	0.115902	0.095143	8.0405e-114	0.0513032	0.510194	0.0855971	0.00981231	0.0440915
AC004817.3	4.88558e-06	0.00704571	3.07975e-08	0.000149599	5.97313e-06	0.225529	0.360379	1.67614e-06	0.499732	0.00280815	1.2377e-107
AC004847.1	2.51539e-56	1.1905e-20	1.7885e-110	8.03949e-95	2.68466e-74	0.0378904	0.0304698	5.65021e-33	1.47109e-05	2.0089e-53	1.77341e-28
AC005785.1	0.588643	0.917041	0.44113	0.375329	0.461284	7.4814e-115	0.0592976	5.68429e-06	0.108533	0.239594	0.365561
AC006369.1	2.1691e-42	5.62939e-09	2.60966e-54	1.54295e-25	2.51537e-46	0.00781995	0.255918	2.14138e-29	0.000332586	1.0757e-104	3.34621e-24
AC007038.1	0.00457985	0.00971728	0.000119239	0.446602	0.150554	4.4384e-110	0.16168	0.155974	0.714097	0.023619	0.00253022
AC015813.1	0.165619	0.140814	0.0931051	0.772752	0.951783	1.8969e-118	0.372402	0.0212729	0.859062	0.00364499	0.00380969
AC015961.2	1.22372e-08	1.19709e-06	5.95579e-10	6.21516e-05	2.96874e-09	2.6877e-114	0.166246	0.117372	0.00162063	0.000239657	0.00123776
AC027682.4	5.90816e-08	1.11446e-06	1.65809e-09	6.84035e-06	1.00746e-10	2.3686e-109	0.227025	0.0362205	0.000986693	2.03531e-06	0.00101297
AC040162.3	0.145349	0.602846	0.371565	0.394566	0.916548	2.8398e-124	0.0544383	0.000164959	0.395149	0.0928167	0.0932077
AC069281.2	0.514245	0.00172696	0.126448	0.858064	0.56221	1.4042e-120	0.22155	0.000482877	0.185453	0.600705	0.283687
AC073869.1	1.21215e-08	3.31607e-05	1.97511e-08	0.00183602	2.90344e-07	4.1656e-136	0.0695542	0.0657438	0.000619872	3.29064e-05	0.00122083
AC087672.2	2.54238e-68	6.58957e-14	1.5757e-104	2.11375e-52	3.96611e-56	0.00348793	0.0990247	1.39179e-35	6.44312e-08	3.56752e-54	6.74449e-62
AC087741.1	0.00331601	1.75516e-07	0.000852548	0.712374	0.00829284	5.7254e-144	0.754431	0.0700964	0.270714	0.0634442	0.0481183
AC092809.4	0.14085	0.0176643	0.0520566	0.0889493	0.00304607	9.1267e-107	0.109823	0.595426	0.0153671	0.198221	0.119687
AC109460.3	1.4167e-05	0.0706971	0.000323314	0.0313118	0.0181169	4.5608e-105	0.00357222	0.626354	0.293981	0.00447996	0.00449723
AC116049.1	1.3702e-75	6.29911e-32	8.2578e-109	5.87956e-34	2.54196e-51	1.04221e-06	0.000904048	1.22059e-66	0.00288773	1.62274e-29	1.07943e-22
AC135048.4	0.189934	0.367455	0.312484	0.857989	0.621541	2.6663e-119	0.031618	0.0645479	0.526011	0.0406061	0.151223
AC145098.1	3.81262e-79	8.95245e-17	5.52108e-96	1.0761e-114	1.6537e-102	0.926805	0.461628	1.81596e-39	1.09284e-13	1.95493e-63	9.3608e-18
AL008729.1	7.15394e-07	0.0360664	2.00666e-07	0.0183049	0.000143343	2.9473e-106	0.424275	0.000284512	0.171168	3.27574e-05	0.00106051
AL031705.1	0.000951986	0.00757067	0.000474605	0.0333497	0.0115908	1.4801e-107	0.643588	0.738859	0.0918089	0.00928043	0.0149306
AL109811.1	0.222402	0.226024	0.0585837	0.942069	0.476646	1.663e-145	0.938423	0.696615	0.444758	0.0516447	0.0326677
AL138831.3	2.47458e-05	0.0123438	1.5818e-06	0.00166673	1.58901e-05	7.8998e-107	0.19019	0.264936	0.0501563	4.68409e-05	0.00232689
AL355987.4	2.92321e-08	2.25561e-05	2.66522e-08	0.000156944	5.71124e-08	3.3654e-137	0.403773	0.000763473	0.000728362	1.47636e-05	0.00287761
AL450384.2	1.25311e-15	1.87462e-18	2.22963e-21	2.93229e-08	1.07568e-18	4.9804e-126	0.23741	3.19422e-14	1.53626e-05	1.45199e-08	7.73633e-07
AL512770.1	0.000740237	0.00109876	0.00165139	0.210232	0.021984	4.0942e-113	0.479018	0.0482965	0.0145707	0.0927396	0.0387012
AP002490.1	4.85744e-07	8.18559e-05	4.25334e-09	0.0109311	7.11207e-07	1.0038e-106	0.212589	3.34995e-05	0.101348	6.04822e-09	8.15568e-06
ARHGAP27P1.BPTFP1.KPNA2P3	0.0606576	0.000348292	0.0477957	0.920704	0.828747	2.3935e-112	0.124784	0.922175	0.419847	0.779588	0.375612
CARD8.AS1	2.04831e-93	5.63517e-43	1.2717e-143	4.59465e-62	5.03635e-82	0.000917943	0.18799	8.94887e-56	9.07044e-08	2.2331e-65	1.54491e-21
CCDC18.AS1	0.5147	0.000669511	0.0400898	0.647873	0.315342	2.4117e-104	0.0202523	0.739929	0.0363357	0.32427	0.0216504
CYTOR	8.93535e-74	6.00595e-76	4.2557e-104	3.62233e-26	4.2575e-49	3.99447e-05	6.83477e-05	4.80068e-49	4.42787e-05	4.35952e-32	3.22168e-20
FAM13A.AS1	2.0129e-13	9.05817e-19	2.55555e-17	9.59975e-06	4.81283e-12	2.5079e-109	0.494324	2.37488e-11	0.000164269	1.76117e-05	3.02196e-05
GUSBP11	3.55475e-09	1.98815e-11	4.04201e-13	6.28132e-05	2.16416e-10	2.1452e-116	0.873013	0.00222994	0.0296448	5.4384e-05	0.000893152
HCP5	2.2389e-111	2.85989e-23	1.21341e-66	3.85263e-38	7.8572e-62	4.03018e-08	0.927554	5.32326e-75	1.16506e-08	1.77021e-45	4.35304e-15
LINC01146	1.03388e-75	4.07058e-08	1.28386e-70	1.5254e-110	1.18841e-53	0.0627083	0.467764	3.05112e-24	6.28391e-09	1.86023e-62	6.71015e-19
LINC01355	0.843159	0.56499	0.224162	0.193561	0.990773	2.9449e-140	0.990882	0.423479	0.892622	0.18354	0.0255154
LINC01426	6.52876e-94	1.3937e-48	5.4576e-126	5.68704e-40	7.05649e-83	1.06451e-06	0.00296169	9.60475e-74	8.30226e-09	2.93216e-50	3.33291e-21
LINC01504	1.84205e-93	7.66435e-21	2.8875e-126	2.02313e-70	1.35226e-92	0.0678468	0.793931	5.89246e-48	1.58461e-16	1.42248e-81	2.80085e-20
LINC01506	6.90965e-78	1.26984e-11	5.7712e-113	1.08479e-64	7.84147e-46	0.00867597	0.701441	2.36343e-33	5.03216e-05	6.08372e-61	4.28542e-18
PCED1B.AS1	7.7435e-112	1.33212e-12	3.0056e-141	7.36134e-94	5.37699e-73	0.000455282	0.587032	9.70218e-43	1.01627e-16	4.10151e-72	1.00245e-28
PDXDC2P.NPIPB14P	0.463684	0.94496	0.509949	0.470795	0.954296	1.9697e-108	0.131528	0.142958	0.795702	0.556106	0.177885
PSMB8.AS1	5.6294e-130	7.13165e-28	1.39059e-86	3.04207e-62	9.08743e-71	8.40478e-05	0.836889	5.76247e-75	1.15294e-16	1.27937e-61	1.50172e-19
RFPL3S	0.0155007	0.0564215	0.0103849	0.712075	0.0471859	1.8271e-152	0.162764	0.715267	0.0277986	0.15339	0.165114
SLC25A25.AS1	6.20189e-07	0.000568125	7.83236e-07	0.0271057	0.000199047	1.1379e-144	0.103429	0.0328708	0.0187454	9.57451e-05	0.00204514
SSBP3.AS1	1.34828e-08	1.88709e-11	1.57754e-11	0.000663248	3.6007e-11	4.8357e-121	0.0641559	1.4899e-08	0.0184708	1.60914e-07	6.13069e-05
USP30.AS1	1.7667e-121	1.53387e-10	1.28027e-77	2.11603e-67	3.10631e-68	7.40322e-05	0.662636	2.94603e-61	7.68839e-07	4.17205e-63	4.50862e-21

## Sheet: Supplementary Table 2
Supplementary Table 2. ConsensusClusterPlus.
ID	cluster
TCGA.12.0618.01A.01R.1849.01	1
TCGA.02.2485.01A.01R.1849.01	1
TCGA.15.0742.01A.01R.1850.01	2
TCGA.06.0210.01A.01R.1849.01	2
TCGA.28.5204.01A.01R.1850.01	2
TCGA.06.0168.01A.01R.1849.01	2
TCGA.28.2514.01A.02R.1850.01	2
TCGA.06.0221.02A.11R.2005.01	1
TCGA.14.1829.01A.01R.1850.01	2
TCGA.06.0152.02A.01R.2005.01	2
TCGA.06.0187.01A.01R.1849.01	2
TCGA.06.0744.01A.01R.1849.01	1
TCGA.26.5139.01A.01R.1850.01	2
TCGA.06.0125.01A.01R.1849.01	1
TCGA.06.0190.02A.01R.2005.01	2
TCGA.12.0616.01A.01R.1849.01	2
TCGA.76.4928.01B.01R.1850.01	2
TCGA.06.0156.01A.03R.1849.01	2
TCGA.06.0686.01A.01R.1849.01	2
TCGA.06.0750.01A.01R.1849.01	2
TCGA.28.1747.01C.01R.1850.01	2
TCGA.41.5651.01A.01R.1850.01	1
TCGA.19.2629.01A.01R.1850.01	2
TCGA.32.4213.01A.01R.1850.01	2
TCGA.06.0157.01A.01R.1849.01	2
TCGA.76.4925.01A.01R.1850.01	2
TCGA.06.2565.01A.01R.1849.01	1
TCGA.06.0158.01A.01R.1849.01	1
TCGA.06.5413.01A.01R.1849.01	2
TCGA.76.4926.01B.01R.1850.01	2
TCGA.06.5417.01A.01R.1849.01	1
TCGA.06.2562.01A.01R.1849.01	2
TCGA.41.3915.01A.01R.1850.01	2
TCGA.06.0130.01A.01R.1849.01	2
TCGA.06.0745.01A.01R.1849.01	2
TCGA.19.5960.01A.11R.1850.01	1
TCGA.06.0645.01A.01R.1849.01	2
TCGA.06.5858.01A.01R.1849.01	2
TCGA.27.2521.01A.01R.1850.01	1
TCGA.19.1787.01B.01R.1850.01	1
TCGA.06.0178.01A.01R.1849.01	2
TCGA.12.3652.01A.01R.1849.01	2
TCGA.28.5220.01A.01R.1850.01	2
TCGA.08.0386.01A.01R.1849.01	2
TCGA.06.5414.01A.01R.1849.01	2
TCGA.28.5215.01A.01R.1850.01	2
TCGA.06.2557.01A.01R.1849.01	2
TCGA.19.4065.02A.11R.2005.01	2
TCGA.26.5132.01A.01R.1850.01	2
TCGA.19.1389.02A.21R.2005.01	2
TCGA.32.1982.01A.01R.1850.01	2
TCGA.19.2624.01A.01R.1850.01	1
TCGA.06.2570.01A.01R.1849.01	1
TCGA.32.2634.01A.01R.1850.01	1
TCGA.12.3650.01A.01R.1849.01	2
TCGA.06.0219.01A.01R.1849.01	2
TCGA.06.0141.01A.01R.1849.01	2
TCGA.02.2486.01A.01R.1849.01	2
TCGA.28.5209.01A.01R.1850.01	2
TCGA.06.0156.01A.02R.1849.01	2
TCGA.12.5295.01A.01R.1849.01	2
TCGA.06.0649.01B.01R.1849.01	2
TCGA.28.2513.01A.01R.1850.01	2
TCGA.06.0644.01A.02R.1849.01	2
TCGA.32.2615.01A.01R.1850.01	2
TCGA.41.2571.01A.01R.1850.01	1
TCGA.28.2510.01A.01R.1850.01	1
TCGA.06.2559.01A.01R.1849.01	2
TCGA.06.5410.01A.01R.1849.01	2
TCGA.06.5412.01A.01R.1849.01	2
TCGA.27.1835.01A.01R.1850.01	1
TCGA.76.4932.01A.01R.1850.01	2
TCGA.28.2499.01A.01R.1850.01	2
TCGA.19.2625.01A.01R.1850.01	1
TCGA.19.4065.01A.01R.2005.01	2
TCGA.06.5418.01A.01R.1849.01	2
TCGA.12.0821.01A.01R.1849.01	2
TCGA.06.0211.02A.02R.2005.01	2
TCGA.06.2558.01A.01R.1849.01	2
TCGA.06.0190.01A.01R.1849.01	2
TCGA.06.0211.01A.01R.1849.01	2
TCGA.28.5208.01A.01R.1850.01	2
TCGA.26.5134.01A.01R.1850.01	1
TCGA.14.1823.01A.01R.1849.01	2
TCGA.26.5135.01A.01R.1850.01	2
TCGA.14.1402.02A.01R.2005.01	2
TCGA.06.2563.01A.01R.1849.01	2
TCGA.41.2572.01A.01R.1850.01	2
TCGA.27.2526.01A.01R.1850.01	2
TCGA.06.0138.01A.02R.1849.01	2
TCGA.06.0238.01A.02R.1849.01	2
TCGA.06.1804.01A.01R.1849.01	1
TCGA.26.5136.01B.01R.1850.01	2
TCGA.06.5408.01A.01R.1849.01	2
TCGA.19.2620.01A.01R.1850.01	1
TCGA.16.0846.01A.01R.1850.01	1
TCGA.06.0184.01A.01R.1849.01	2
TCGA.12.3653.01A.01R.1849.01	2
TCGA.27.2519.01A.01R.1850.01	2
TCGA.06.0743.01A.01R.1849.01	1
TCGA.06.0882.01A.01R.1849.01	2
TCGA.28.2509.01A.01R.1850.01	2
TCGA.06.0132.01A.02R.1849.01	2
TCGA.28.5207.01A.01R.1850.01	2
TCGA.06.0211.01B.01R.1849.01	2
TCGA.19.0957.02A.11R.2005.01	1
TCGA.26.5133.01A.01R.1850.01	1
TCGA.12.5299.01A.02R.1849.01	2
TCGA.06.0129.01A.01R.1849.01	1
TCGA.12.1597.01B.01R.1849.01	2
TCGA.14.1825.01A.01R.1850.01	2
TCGA.06.5856.01A.01R.1849.01	2
TCGA.14.0790.01B.01R.1849.01	2
TCGA.14.0781.01B.01R.1849.01	2
TCGA.27.1832.01A.01R.1850.01	2
TCGA.15.1444.01A.02R.1850.01	2
TCGA.27.2523.01A.01R.1850.01	2
TCGA.27.1837.01A.01R.1850.01	2
TCGA.32.2632.01A.01R.1850.01	2
TCGA.32.5222.01A.01R.1850.01	2
TCGA.32.2638.01A.01R.1850.01	2
TCGA.06.0171.02A.11R.2005.01	2
TCGA.27.1830.01A.01R.1850.01	1
TCGA.06.0125.02A.11R.2005.01	2
TCGA.14.0736.02A.01R.2005.01	2
TCGA.14.1034.01A.01R.1849.01	2
TCGA.14.2554.01A.01R.1850.01	2
TCGA.06.0747.01A.01R.1849.01	1
TCGA.41.4097.01A.01R.1850.01	1
TCGA.14.0787.01A.01R.1849.01	2
TCGA.06.0646.01A.01R.1849.01	1
TCGA.14.0817.01A.01R.1849.01	2
TCGA.06.0139.01A.01R.1849.01	2
TCGA.28.5216.01A.01R.1850.01	2
TCGA.19.1390.01A.01R.1850.01	1
TCGA.32.2616.01A.01R.1850.01	2
TCGA.12.0619.01A.01R.1849.01	2
TCGA.76.4929.01A.01R.1850.01	1
TCGA.14.1034.02B.01R.2005.01	1
TCGA.06.0878.01A.01R.1849.01	2
TCGA.26.1442.01A.01R.1850.01	1
TCGA.02.2483.01A.01R.1849.01	2
TCGA.27.1834.01A.01R.1850.01	2
TCGA.14.0789.01A.01R.1849.01	2
TCGA.06.5859.01A.01R.1849.01	2
TCGA.06.5416.01A.01R.1849.01	2
TCGA.32.1980.01A.01R.1850.01	2
TCGA.28.1753.01A.01R.1850.01	2
TCGA.19.2619.01A.01R.1850.01	2
TCGA.06.2564.01A.01R.1849.01	1
TCGA.32.1970.01A.01R.1850.01	2
TCGA.06.2561.01A.02R.1849.01	1
TCGA.16.1045.01B.01R.1850.01	2
TCGA.06.0210.02A.01R.2005.01	2
TCGA.28.5218.01A.01R.1850.01	2
TCGA.76.4931.01A.01R.1850.01	1
TCGA.27.2524.01A.01R.1850.01	2
TCGA.76.4927.01A.01R.1850.01	2
TCGA.02.0047.01A.01R.1849.01	2
TCGA.27.2528.01A.01R.1850.01	2
TCGA.06.5411.01A.01R.1849.01	2
TCGA.27.1831.01A.01R.1850.01	2
TCGA.06.0174.01A.01R.1849.01	2
TCGA.28.5213.01A.01R.1850.01	2
TCGA.02.0055.01A.01R.1849.01	2
TCGA.14.0871.01A.01R.1849.01	1
TCGA.06.2569.01A.01R.1849.01	1
TCGA.06.0749.01A.01R.1849.01	2
TCGA.06.2567.01A.01R.1849.01	2
TCGA.CS.5396.01A.02R.1470.07	2
TCGA.DU.8158.01A.11R.2256.07	2
TCGA.S9.A89V.01A.11R.A36H.07	1
TCGA.DU.6404.01A.11R.1708.07	2
TCGA.S9.A7QZ.01A.12R.A34R.07	1
TCGA.DU.8162.01A.21R.2256.07	1
TCGA.QH.A65X.01A.11R.A32Q.07	1
TCGA.DH.5143.01A.01R.1470.07	2
TCGA.CS.4944.01A.01R.1470.07	2
TCGA.QH.A6X4.01A.51R.A32Q.07	1
TCGA.E1.A7YK.01A.11R.A34F.07	1
TCGA.DU.7013.01A.11R.2027.07	1
TCGA.S9.A7R8.01A.11R.A34R.07	1
TCGA.HT.7604.01A.11R.2090.07	1
TCGA.HT.8013.01A.11R.2403.07	1
TCGA.WY.A85D.01A.11R.A36H.07	1
TCGA.DU.6400.01A.12R.1708.07	1
TCGA.P5.A72W.01A.11R.A32Q.07	1
TCGA.VM.A8CD.01A.11R.A36H.07	1
TCGA.DU.6407.02A.12R.A36H.07	1
TCGA.S9.A7R3.01A.11R.A34R.07	1
TCGA.DU.A7TC.01A.21R.A34R.07	1
TCGA.DB.5279.01A.03R.2347.07	1
TCGA.FG.A4MT.02A.11R.A29R.07	1
TCGA.DU.A7TD.01A.12R.A34F.07	2
TCGA.TM.A84M.01A.11R.A36H.07	1
TCGA.HT.7693.01A.11R.2256.07	1
TCGA.HT.7476.01A.11R.2027.07	1
TCGA.P5.A72X.01A.11R.A32Q.07	1
TCGA.HT.7485.01A.11R.2027.07	2
TCGA.P5.A5EW.01A.11R.A27Q.07	1
TCGA.FG.A60K.01A.11R.A29R.07	1
TCGA.HT.8015.01B.11R.A28M.07	2
TCGA.TQ.A7RS.01A.12R.A33Z.07	1
TCGA.FG.A60J.01A.11R.A28M.07	1
TCGA.HT.8105.01A.11R.2404.07	1
TCGA.TM.A7CA.01A.21R.A33Z.07	1
TCGA.HW.7490.01A.11R.2027.07	1
TCGA.HT.7611.01A.11R.2403.07	1
TCGA.HT.7467.01A.11R.2027.07	1
TCGA.VM.A8CB.01A.11R.A36H.07	1
TCGA.HT.A615.01A.11R.A29R.07	1
TCGA.E1.A7YQ.01A.11R.A34R.07	1
TCGA.P5.A730.01A.11R.A32Q.07	1
TCGA.QH.A6X8.01A.12R.A32Q.07	1
TCGA.S9.A6WD.01A.12R.A33Z.07	1
TCGA.S9.A7IQ.01A.21R.A34F.07	1
TCGA.S9.A6TY.01A.12R.A32Q.07	1
TCGA.HT.7602.01A.21R.2090.07	1
TCGA.HT.A61C.01A.11R.A29R.07	2
TCGA.FG.8186.01A.11R.2256.07	1
TCGA.FG.5963.02A.12R.A29R.07	2
TCGA.E1.A7YW.01A.11R.A34R.07	1
TCGA.DB.A64W.01A.11R.A29R.07	1
TCGA.HT.7691.01A.11R.2256.07	2
TCGA.TQ.A7RV.01A.21R.A34F.07	1
TCGA.F6.A8O3.01A.11R.A36H.07	1
TCGA.S9.A6WQ.01A.12R.A34F.07	1
TCGA.S9.A6U6.01A.12R.A33Z.07	1
TCGA.HW.8320.01A.11R.2404.07	1
TCGA.DU.7304.02A.12R.A36H.07	1
TCGA.E1.5311.01A.01R.1470.07	1
TCGA.VM.A8CE.01A.11R.A36H.07	1
TCGA.HT.7474.01A.11R.2027.07	1
TCGA.QH.A65Z.01A.11R.A29R.07	1
TCGA.DB.5277.01A.01R.1470.07	1
TCGA.TM.A84C.01A.11R.A36H.07	1
TCGA.CS.6670.01A.11R.1896.07	1
TCGA.S9.A7J1.01A.21R.A34R.07	1
TCGA.HT.7687.01A.11R.2256.07	1
TCGA.FG.A6J1.01A.11R.A31N.07	1
TCGA.FG.A711.01A.21R.A33Z.07	1
TCGA.QH.A6CY.01A.11R.A32Q.07	1
TCGA.FG.A710.01A.12R.A33Z.07	1
TCGA.S9.A7R2.01A.21R.A34R.07	1
TCGA.HT.A618.01A.11R.A29R.07	1
TCGA.P5.A77X.01A.11R.A32Q.07	1
TCGA.RY.A83Z.01A.11R.A36H.07	1
TCGA.DB.A64O.01A.11R.A29R.07	1
TCGA.FG.8188.01A.11R.2256.07	1
TCGA.E1.A7YI.01A.11R.A34F.07	1
TCGA.P5.A5F6.01A.11R.A28M.07	1
TCGA.S9.A7R7.01A.11R.A34R.07	2
TCGA.HW.8322.01A.11R.2404.07	1
TCGA.HT.7692.01A.12R.2256.07	1
TCGA.HT.7858.01A.11R.2403.07	1
TCGA.HW.7489.01A.11R.2027.07	1
TCGA.HT.A614.01A.11R.A29R.07	1
TCGA.DU.A5TY.01A.11R.A28M.07	1
TCGA.DU.5852.01A.11R.1708.07	2
TCGA.DB.A64L.01A.11R.A29R.07	1
TCGA.CS.4942.01A.01R.1470.07	2
TCGA.HT.A74K.01A.11R.A32Q.07	2
TCGA.HT.7680.01A.11R.2256.07	2
TCGA.S9.A6UB.01A.21R.A33Z.07	1
TCGA.HT.8108.01A.11R.2404.07	1
TCGA.DU.6404.02A.21R.A36H.07	2
TCGA.DB.A4XD.01A.11R.A27Q.07	1
TCGA.HT.7884.01B.11R.2403.07	1
TCGA.FG.6688.01A.11R.1896.07	2
TCGA.S9.A6WI.01A.21R.A33Z.07	1
TCGA.HT.7688.01A.11R.2256.07	1
TCGA.S9.A6TV.01A.12R.A34R.07	2
TCGA.HT.7616.01A.11R.2256.07	1
TCGA.P5.A5F4.01A.11R.A28M.07	1
TCGA.QH.A6X5.01A.12R.A32Q.07	1
TCGA.QH.A6CS.01A.11R.A31N.07	1
TCGA.FG.7643.01A.11R.2090.07	1
TCGA.CS.4938.01B.11R.1896.07	1
TCGA.HT.7695.01A.11R.2256.07	1
TCGA.HT.A61A.01A.11R.A29R.07	1
TCGA.TM.A84T.01A.11R.A36H.07	1
TCGA.P5.A780.01A.12R.A32Q.07	1
TCGA.P5.A77W.01A.11R.A32Q.07	1
TCGA.DU.6402.01A.11R.1708.07	2
TCGA.FG.A87N.01A.11R.A36H.07	1
TCGA.DU.A5TS.01A.11R.A28M.07	1
TCGA.HT.7676.01A.11R.2403.07	2
TCGA.DB.A75P.01A.11R.A32Q.07	1
TCGA.HT.A4DV.01A.11R.A26U.07	1
TCGA.E1.A7YE.01A.11R.A34F.07	1
TCGA.FG.A70Y.01A.12R.A34R.07	1
TCGA.QH.A6CU.01A.11R.A31N.07	1
TCGA.QH.A6CV.01A.11R.A31N.07	1
TCGA.S9.A6TS.01A.12R.A33Z.07	1
TCGA.TQ.A7RM.01A.11R.A33Z.07	1
TCGA.HT.7473.01A.11R.2027.07	1
TCGA.DU.8163.01A.11R.2256.07	1
TCGA.DU.8167.01A.11R.2256.07	1
TCGA.HT.8010.01A.11R.2403.07	1
TCGA.HT.7480.01A.11R.2090.07	1
TCGA.E1.A7YO.01A.11R.A34F.07	1
TCGA.HT.8564.01A.11R.2404.07	1
TCGA.DU.7010.01A.11R.2027.07	1
TCGA.DB.A4XC.01A.11R.A26U.07	1
TCGA.HT.7874.01A.11R.2403.07	1
TCGA.P5.A5EU.01A.11R.A27Q.07	2
TCGA.S9.A6WL.01A.21R.A33Z.07	1
TCGA.DU.7302.01A.11R.2090.07	1
TCGA.HT.8558.01A.21R.2404.07	1
TCGA.HT.7605.01A.11R.2090.07	1
TCGA.HT.8018.01A.11R.2404.07	2
TCGA.TQ.A7RW.01A.11R.A33Z.07	1
TCGA.DB.A4XH.01A.11R.A27Q.07	1
TCGA.DB.A4XB.01A.11R.A26U.07	1
TCGA.DU.6408.01A.11R.1708.07	1
TCGA.S9.A6WG.01A.11R.A33Z.07	1
TCGA.HT.7686.01A.11R.2256.07	2
TCGA.HT.8011.01A.11R.2403.07	1
TCGA.CS.5393.01A.01R.1470.07	1
TCGA.DU.5872.02A.21R.A36H.07	2
TCGA.CS.6666.01A.11R.1896.07	1
TCGA.DU.A5TU.01A.11R.A28M.07	1
TCGA.CS.6290.01A.11R.1708.07	2
TCGA.HW.8321.01A.11R.2404.07	1
TCGA.DU.A6S7.01A.21R.A32Q.07	1
TCGA.HT.7882.01A.11R.2403.07	2
TCGA.S9.A7QW.01A.11R.A34F.07	1
TCGA.DU.6542.01A.11R.1896.07	1
TCGA.HW.8319.01A.11R.2404.07	1
TCGA.IK.7675.01A.11R.2090.07	1
TCGA.DU.7304.01A.12R.2090.07	1
TCGA.DB.A4XE.01A.11R.A27Q.07	1
TCGA.DB.5280.01A.01R.1470.07	1
TCGA.FG.8187.01A.11R.2256.07	1
TCGA.DU.A7TJ.01A.11R.A34R.07	2
TCGA.DB.5278.01A.01R.1470.07	1
TCGA.HT.7470.01A.12R.2090.07	1
TCGA.S9.A6U8.01A.21R.A33Z.07	1
TCGA.FG.6690.01A.11R.1896.07	1
TCGA.DH.A7US.01A.11R.A33Z.07	1
TCGA.F6.A8O4.01A.11R.A36H.07	1
TCGA.HT.7689.01A.11R.2256.07	1
TCGA.HT.8111.01A.11R.2404.07	1
TCGA.P5.A781.01A.11R.A32Q.07	1
TCGA.E1.5319.01A.01R.1896.07	1
TCGA.HT.7875.01A.11R.2403.07	1
TCGA.VM.A8C9.01A.11R.A36H.07	2
TCGA.HT.A616.01A.11R.A29R.07	1
TCGA.S9.A7R1.01A.12R.A34R.07	1
TCGA.CS.4941.01A.01R.1470.07	2
TCGA.DU.5870.01A.11R.1708.07	1
TCGA.FG.7637.01A.11R.2090.07	1
TCGA.CS.6668.01A.11R.1896.07	1
TCGA.S9.A6U5.01A.12R.A33Z.07	1
TCGA.DH.A66G.01A.21R.A31N.07	1
TCGA.S9.A6UA.01A.12R.A33Z.07	2
TCGA.P5.A5EV.01A.11R.A27Q.07	1
TCGA.E1.A7YJ.01A.11R.A34F.07	2
TCGA.FG.5963.01A.11R.1708.07	2
TCGA.DB.5273.01A.01R.1470.07	2
TCGA.FG.5964.01A.11R.1708.07	1
TCGA.HT.7681.01A.11R.2403.07	1
TCGA.TQ.A7RK.02B.11R.A40A.07	1
TCGA.HT.7603.01A.21R.2090.07	1
TCGA.IK.8125.01A.11R.2256.07	1
TCGA.P5.A735.01A.11R.A32Q.07	1
TCGA.S9.A6WN.01A.12R.A33Z.07	2
TCGA.DB.5281.01A.01R.1470.07	1
TCGA.HT.7478.01A.11R.2027.07	2
TCGA.TQ.A7RH.01A.12R.A34F.07	1
TCGA.DU.7301.01A.11R.2090.07	1
TCGA.HT.7879.01A.11R.2403.07	1
TCGA.CS.6188.01A.11R.1896.07	2
TCGA.DH.5144.01A.01R.1470.07	1
TCGA.P5.A5EY.01A.11R.A27Q.07	2
TCGA.DU.7306.01A.11R.2090.07	1
TCGA.TM.A7C3.01A.11R.A32Q.07	1
TCGA.TM.A7C5.01A.11R.A32Q.07	1
TCGA.TM.A7C4.01A.11R.A32Q.07	1
TCGA.HT.7694.01A.11R.2256.07	1
TCGA.HT.7677.01A.11R.2256.07	1
TCGA.DU.5849.01A.11R.1708.07	1
TCGA.DU.A76R.01A.11R.A32Q.07	1
TCGA.TM.A84R.01A.21R.A36H.07	1
TCGA.HT.7479.01A.11R.2027.07	1
TCGA.QH.A65R.01A.21R.A31N.07	1
TCGA.E1.A7YS.01A.11R.A34F.07	1
TCGA.DB.A75O.01A.11R.A32Q.07	1
TCGA.FG.7641.01B.11R.2256.07	1
TCGA.FG.A4MY.01A.11R.A26U.07	1
TCGA.DU.6397.01A.11R.1708.07	1
TCGA.HT.7606.01A.11R.2090.07	1
TCGA.TQ.A7RG.01A.11R.A33Z.07	1
TCGA.DU.6395.01A.13R.1708.07	1
TCGA.KT.A7W1.01A.11R.A34F.07	2
TCGA.DH.A7UR.01A.11R.A33Z.07	1
TCGA.DB.A4X9.01A.11R.A26U.07	1
TCGA.RY.A843.01A.11R.A36H.07	1
TCGA.HT.A4DS.01A.11R.A26U.07	1
TCGA.R8.A6ML.01A.11R.A32Q.07	1
TCGA.W9.A837.01A.11R.A36H.07	1
TCGA.P5.A5F1.01A.11R.A28M.07	1
TCGA.DU.A76L.01A.11R.A32Q.07	2
TCGA.TQ.A7RI.01A.11R.A33Z.07	1
TCGA.DH.A669.02A.11R.A31N.07	2
TCGA.DU.A7T8.01A.21R.A34R.07	1
TCGA.HT.7860.01A.11R.2403.07	2
TCGA.DU.A7TI.01A.11R.A33Z.07	1
TCGA.DU.A7TG.01A.21R.A34R.07	1
TCGA.TM.A84L.01A.11R.A36H.07	1
TCGA.KT.A74X.01A.11R.A32Q.07	1
TCGA.FG.8182.01A.11R.2256.07	1
TCGA.HT.7690.01A.11R.2256.07	1
TCGA.DU.A5TR.01A.11R.A28M.07	1
TCGA.DU.6407.01A.13R.1708.07	1
TCGA.HT.7610.01A.21R.2090.07	1
TCGA.S9.A7R4.01A.12R.A34R.07	1
TCGA.HW.7493.01A.11R.2027.07	2
TCGA.DU.6392.01A.11R.1708.07	1
TCGA.HW.7491.01A.11R.2027.07	1
TCGA.DU.6397.02A.12R.A36H.07	1
TCGA.TM.A84Q.01A.11R.A36H.07	1
TCGA.DU.7298.01A.11R.2027.07	1
TCGA.HT.7608.01A.11R.2090.07	1
TCGA.E1.A7YN.01A.11R.A34F.07	2
TCGA.DH.A7UU.01A.12R.A34F.07	1
TCGA.E1.A7Z6.01A.11R.A34R.07	1
TCGA.S9.A6WP.01A.12R.A34F.07	1
TCGA.FG.8191.01A.11R.2256.07	1
TCGA.TQ.A7RQ.01A.11R.A33Z.07	1
TCGA.S9.A6TZ.01A.21R.A32Q.07	1
TCGA.DU.7006.01A.11R.2027.07	2
TCGA.TM.A7CF.02A.11R.A32Q.07	1
TCGA.WH.A86K.01A.11R.A36H.07	1
TCGA.DU.A5TW.01A.11R.A28M.07	1
TCGA.TQ.A8XE.02A.11R.A36H.07	1
TCGA.RY.A847.01A.11R.A36H.07	1
TCGA.E1.A7YD.01A.11R.A34F.07	1
TCGA.RY.A845.01A.11R.A36H.07	1
TCGA.P5.A5F0.01A.11R.A28M.07	1
TCGA.DU.8168.01A.11R.2256.07	1
TCGA.DU.7019.01A.11R.2027.07	1
TCGA.DH.A66F.01A.11R.A29R.07	1
TCGA.QH.A6X9.01A.12R.A32Q.07	1
TCGA.DU.5847.01A.11R.1708.07	1
TCGA.HT.A619.01A.11R.A29R.07	1
TCGA.DH.A7UT.01A.12R.A34F.07	1
TCGA.HT.A61B.01A.11R.A29R.07	1
TCGA.TQ.A7RK.01A.11R.A33Z.07	1
TCGA.P5.A737.01A.11R.A32Q.07	1
TCGA.DU.7299.01A.21R.2027.07	1
TCGA.DU.8165.01A.11R.2256.07	2
TCGA.CS.5397.01A.01R.1896.07	2
TCGA.DU.7008.01A.11R.2027.07	1
TCGA.DU.5872.01A.11R.1708.07	1
TCGA.S9.A7IS.01A.11R.A34F.07	1
TCGA.FG.6692.01A.11R.1896.07	2
TCGA.HT.8012.01A.11R.2403.07	1
TCGA.DH.A669.01A.12R.A31N.07	2
TCGA.S9.A6U2.01A.21R.A33Z.07	1
TCGA.HT.7902.01A.12R.2403.07	1
TCGA.DB.A64V.01A.11R.A29R.07	1
TCGA.FG.5965.02A.11R.A29R.07	1
TCGA.DU.6407.02B.11R.A36H.07	1
TCGA.HT.A5R9.01A.11R.A28M.07	1
TCGA.P5.A5F2.01A.11R.A28M.07	1
TCGA.CS.6186.01A.12R.2027.07	1
TCGA.HT.7854.01A.11R.2256.07	1
TCGA.FG.5965.01B.11R.1896.07	1
TCGA.S9.A6WH.01A.12R.A33Z.07	1
TCGA.FG.8185.01A.11R.2256.07	1
TCGA.DU.6406.01A.11R.1708.07	2
TCGA.HT.7481.01A.11R.2027.07	1
TCGA.HT.A74H.01A.11R.A32Q.07	1
TCGA.HW.A5KK.01A.11R.A27Q.07	1
TCGA.S9.A6U9.01A.11R.A32Q.07	1
TCGA.E1.A7YH.01A.11R.A34F.07	1
TCGA.S9.A7QX.01A.11R.A34F.07	1
TCGA.TM.A7CF.01A.11R.A32Q.07	1
TCGA.HT.8104.01A.11R.2404.07	2
TCGA.E1.A7YV.01A.11R.A34R.07	1
TCGA.WY.A858.01A.11R.A36H.07	1
TCGA.S9.A6TX.01A.21R.A32Q.07	1
TCGA.TM.A84S.01A.11R.A36H.07	1
TCGA.QH.A6CZ.01A.11R.A32Q.07	1
TCGA.QH.A6CW.01A.11R.A32Q.07	1
TCGA.TQ.A8XE.01A.11R.A36H.07	1
TCGA.DU.8161.01A.11R.2256.07	2
TCGA.QH.A6XA.01A.12R.A32Q.07	1
TCGA.HT.A617.01A.11R.A29R.07	1
TCGA.FG.6689.01A.11R.1896.07	1
TCGA.DB.A75M.01A.11R.A32Q.07	1
TCGA.E1.A7Z3.01A.11R.A34R.07	1
TCGA.FG.7636.01A.11R.2090.07	1
TCGA.S9.A7IZ.01A.11R.A34F.07	1
TCGA.HT.A5RB.01A.11R.A28M.07	1
TCGA.QH.A6XC.01A.12R.A32Q.07	1
TCGA.DU.7290.01A.11R.2027.07	2
TCGA.DU.8164.01A.11R.2256.07	1
TCGA.TQ.A7RO.01A.11R.A33Z.07	1
TCGA.DU.5853.01A.11R.1896.07	1
TCGA.HT.7857.01A.11R.2403.07	2
TCGA.DU.A7TA.01A.11R.A33Z.07	1
TCGA.S9.A7J0.01A.11R.A34F.07	1
TCGA.HW.A5KL.01A.11R.A27Q.07	1
TCGA.FG.A60L.01A.12R.A31N.07	1
TCGA.HT.A74O.01A.11R.A32Q.07	1
TCGA.CS.4943.01A.01R.1470.07	1
TCGA.EZ.7264.01A.11R.2027.07	1
TCGA.DU.7300.01A.21R.2090.07	2
TCGA.HT.7482.01A.11R.2027.07	1
TCGA.CS.6669.01A.11R.1896.07	1
TCGA.VV.A86M.01A.11R.A36H.07	1
TCGA.DU.5874.01A.11R.1708.07	1
TCGA.VM.A8C8.01A.11R.A36H.07	1
TCGA.P5.A72Z.01A.11R.A32Q.07	1
TCGA.DH.5140.01A.01R.1470.07	1
TCGA.FG.A4MW.01A.11R.A26U.07	1
TCGA.FN.7833.01A.11R.2090.07	1
TCGA.DU.6405.01A.11R.1708.07	2
TCGA.DU.7292.01A.11R.2027.07	1
TCGA.TQ.A7RF.01A.11R.A33Z.07	1
TCGA.FG.5965.02B.11R.A29R.07	1
TCGA.TM.A84O.01A.11R.A36H.07	1
TCGA.DU.A5TT.01A.11R.A28M.07	1
TCGA.R8.A6MK.01A.11R.A32Q.07	1
TCGA.S9.A6U1.01A.21R.A33Z.07	1
TCGA.QH.A6X3.01A.21R.A32Q.07	1
TCGA.HT.8019.01A.21R.2404.07	1
TCGA.CS.5390.01A.02R.1470.07	1
TCGA.HT.8113.01A.11R.2404.07	1
TCGA.DU.A6S8.01A.12R.A32Q.07	1
TCGA.VM.A8CF.01A.11R.A36H.07	1
TCGA.WY.A859.01A.12R.A36H.07	1
TCGA.VV.A829.01A.21R.A36H.07	1
TCGA.S9.A7QY.01A.11R.A34F.07	1
TCGA.QH.A86X.01A.11R.A36H.07	1
TCGA.DH.5141.01A.01R.1470.07	1
TCGA.S9.A6TW.01A.12R.A32Q.07	1
TCGA.WY.A85B.01A.11R.A36H.07	1
TCGA.DH.A66B.01A.11R.A29R.07	1
TCGA.DU.6393.01A.11R.1708.07	1
TCGA.CS.5394.01A.01R.1470.07	1
TCGA.DU.7015.01A.11R.2027.07	2
TCGA.DU.7009.01A.11R.2027.07	1
TCGA.TM.A84J.01A.11R.A36H.07	1
TCGA.E1.5322.01A.01R.1470.07	2
TCGA.HT.7601.01A.11R.2090.07	2
TCGA.TQ.A7RJ.01A.11R.A33Z.07	1
TCGA.QH.A65S.01A.11R.A29R.07	1
TCGA.R8.A73M.01A.11R.A32Q.07	1
TCGA.HW.7495.01A.11R.2027.07	1
TCGA.DU.7309.01A.11R.2090.07	1
TCGA.HT.7877.01A.11R.2403.07	1
TCGA.DU.6403.01A.11R.1708.07	2
TCGA.FG.8181.01A.11R.2256.07	1
TCGA.RY.A840.01A.11R.A36H.07	1
TCGA.E1.A7Z2.01A.21R.A34R.07	1
TCGA.DB.A64R.01A.11R.A29R.07	1
TCGA.QH.A65V.01A.11R.A29R.07	1
TCGA.E1.5307.01A.01R.1896.07	1
TCGA.FG.5962.01B.11R.1896.07	1
TCGA.TQ.A7RR.01A.21R.A34F.07	1
TCGA.DU.7012.01A.11R.2027.07	2
TCGA.DU.6396.01A.11R.1708.07	1
TCGA.DB.A4XF.01A.11R.A27Q.07	1
TCGA.HT.7472.01A.11R.2027.07	1
TCGA.DU.7018.01A.11R.2027.07	1
TCGA.DU.A76K.01A.11R.A33Z.07	1
TCGA.TM.A84H.01A.11R.A36H.07	1
TCGA.HT.7855.01A.11R.2403.07	1
TCGA.FG.8189.01B.11R.A28M.07	1
TCGA.S9.A6U0.01A.12R.A32Q.07	2
TCGA.FG.A6IZ.01A.11R.A31N.07	1
TCGA.DU.7007.01A.11R.2027.07	1
TCGA.S9.A6WO.01A.21R.A34F.07	1
TCGA.DH.A66D.01A.11R.A31N.07	1
TCGA.HT.7469.01A.11R.2256.07	1
TCGA.WY.A85A.01A.21R.A36H.07	1
TCGA.CS.5395.01A.01R.1470.07	2
TCGA.QH.A6CX.01A.11R.A32Q.07	1
TCGA.DU.5855.01A.11R.1708.07	1
TCGA.VW.A8FI.01A.11R.A36H.07	1
TCGA.DU.A5TP.01A.11R.A28M.07	1
TCGA.E1.5302.01A.01R.1470.07	2
TCGA.FG.A4MT.01A.11R.A26U.07	1
TCGA.DB.A75L.01A.11R.A32Q.07	1
TCGA.P5.A5EZ.01A.11R.A27Q.07	1
TCGA.P5.A5EX.01A.12R.A28M.07	2
TCGA.TM.A84G.01A.11R.A36H.07	1
TCGA.DU.6401.01A.11R.1708.07	1
TCGA.HW.A5KJ.01A.12R.A27Q.07	1
TCGA.DU.A7T6.01A.11R.A33Z.07	1
TCGA.FG.7638.01B.12R.2090.07	1
TCGA.HW.A5KM.01A.11R.A27Q.07	2
TCGA.CS.6667.01A.12R.2027.07	1
TCGA.HT.8107.01A.13R.2404.07	1
TCGA.HT.7881.01A.11R.2403.07	1
TCGA.DU.8166.01A.11R.2256.07	1
TCGA.DU.5854.01A.11R.1708.07	1
TCGA.VW.A7QS.01A.12R.A33Z.07	1
TCGA.DU.A76O.01A.11R.A32Q.07	1
TCGA.HW.7487.01A.11R.2027.07	1
TCGA.E1.A7YY.01A.11R.A34R.07	1
TCGA.S9.A6TU.01A.12R.A32Q.07	1
TCGA.DU.6404.02B.11R.A36H.07	1
TCGA.RY.A83X.01A.11R.A36H.07	1
TCGA.HT.7856.01A.11R.2403.07	1
TCGA.RY.A83Y.01A.11R.A36H.07	1
TCGA.QH.A870.01A.11R.A36H.07	1
TCGA.DU.7011.01A.11R.2027.07	2
TCGA.DU.5870.02A.12R.A36H.07	1
TCGA.DU.6394.01A.11R.1708.07	1
TCGA.DB.5274.01A.01R.1470.07	1
TCGA.WY.A85C.01A.11R.A36H.07	1
TCGA.VM.A8CA.01A.11R.A36H.07	1
TCGA.FG.A713.01A.11R.A32Q.07	1
TCGA.E1.5304.01A.01R.1470.07	1
TCGA.HT.7475.01A.11R.2027.07	1
TCGA.DU.A7TB.01A.11R.A33Z.07	1
TCGA.FG.A4MU.01B.11R.A28M.07	2
TCGA.S9.A7IX.01A.12R.A34F.07	2
TCGA.E1.5303.01A.01R.1470.07	2
TCGA.HT.7468.01A.11R.2027.07	1
TCGA.HT.7477.01B.11R.A28M.07	1
TCGA.TQ.A7RP.01A.21R.A34F.07	1
TCGA.P5.A72U.01A.31R.A32Q.07	2
TCGA.P5.A731.01A.11R.A32Q.07	2
TCGA.E1.A7YM.01A.11R.A34F.07	1
TCGA.DB.A64X.01A.11R.A29R.07	1
TCGA.HT.8110.01A.11R.2404.07	2
TCGA.DU.A6S2.01A.21R.A32Q.07	1
TCGA.HT.8109.01A.11R.2404.07	1
TCGA.S9.A89Z.01A.11R.A36H.07	1
TCGA.HT.A5RC.01A.11R.A28M.07	1
TCGA.DU.A6S6.01A.21R.A32Q.07	1
TCGA.FG.A87Q.01A.11R.A36H.07	2
TCGA.WY.A85E.01A.11R.A36H.07	1
TCGA.TQ.A7RN.01A.11R.A33Z.07	1
TCGA.HT.7483.01A.11R.2027.07	1
TCGA.DU.7294.01A.11R.2027.07	1
TCGA.VM.A8CH.01A.12R.A36H.07	1
TCGA.HT.7609.01A.11R.2090.07	1
TCGA.DB.5270.01A.02R.1470.07	2
TCGA.DU.7014.01A.11R.2027.07	1
TCGA.DB.A64P.01A.11R.A29R.07	1
TCGA.TM.A84B.01A.11R.A36H.07	2
TCGA.DB.A75K.01A.11R.A32Q.07	1
TCGA.R8.A6YH.01A.21R.A32Q.07	1
TCGA.E1.5318.01A.01R.1470.07	1
TCGA.DU.6399.01A.12R.1708.07	1
TCGA.FG.A6J3.01A.11R.A31N.07	2
TCGA.FG.A70Z.01A.12R.A33Z.07	2
TCGA.S9.A7J3.01A.21R.A34R.07	1
TCGA.DH.5142.01A.01R.1470.07	2
TCGA.DB.A64Q.01A.11R.A29R.07	1
TCGA.HT.7873.01B.11R.2403.07	1
TCGA.P5.A733.01A.11R.A32Q.07	1
TCGA.E1.A7YL.01A.11R.A34F.07	1
TCGA.TM.A84I.01A.11R.A36H.07	1
TCGA.E1.A7Z4.01A.11R.A34R.07	1
TCGA.S9.A6WE.01A.12R.A33Z.07	1
TCGA.FG.6691.01A.11R.1896.07	2
TCGA.DU.5871.01A.12R.1708.07	1
TCGA.S9.A7J2.01A.11R.A34F.07	1
TCGA.HT.7684.01A.11R.2256.07	1
TCGA.S9.A7IY.01A.11R.A34F.07	1
TCGA.DU.6410.01A.11R.1896.07	1
TCGA.HT.7607.01A.11R.2090.07	1
TCGA.E1.5305.01A.01R.1896.07	1
TCGA.DB.A4XG.01A.11R.A27Q.07	1
TCGA.HW.7486.01A.11R.2027.07	1
TCGA.E1.A7YU.01A.11R.A34R.07	1
TCGA.P5.A736.01A.11R.A32Q.07	2
TCGA.HT.A74J.01A.12R.A32Q.07	1
TCGA.HT.7620.01A.11R.2256.07	1
TCGA.HT.A74L.01A.11R.A32Q.07	1
TCGA.TQ.A7RV.02A.11R.A36H.07	1
TCGA.HT.A5R7.01A.11R.A28M.07	1
TCGA.FG.7634.01A.11R.2090.07	1
TCGA.FG.A4MX.01A.11R.A26U.07	1
TCGA.DB.5275.01A.01R.1470.07	1
TCGA.DB.A64U.01A.11R.A29R.07	1
TCGA.HT.A5RA.01A.11R.A28M.07	2
TCGA.DB.A64S.01A.11R.A29R.07	1
TCGA.HT.8563.01A.11R.2404.07	2
TCGA.P5.A5ET.01A.11R.A27Q.07	1
TCGA.TM.A84F.01A.11R.A36H.07	1
TCGA.HT.7880.01A.11R.2403.07	1
TCGA.DH.A7UV.01A.12R.A34F.07	1
TCGA.DB.A4XA.01A.11R.A26U.07	1
TCGA.TQ.A7RK.02A.11R.A36H.07	1
TCGA.S9.A6WM.01A.12R.A33Z.07	2
TCGA.R8.A6MO.01A.11R.A33Z.07	1
TCGA.HT.8114.01A.11R.2404.07	1
TCGA.HT.7471.01A.11R.2256.07	1
TCGA.HT.A5R5.01A.11R.A28M.07	2
TCGA.DU.A6S3.01A.12R.A32Q.07	1

## Sheet: Supplementary Table 3
Supplementary Table 3. cluster1 CNV of GISTIC.
Unique Name	Descriptor	Wide Peak Limits	Peak Limits	Region Limits	q values	Residual q values after removing segments shared with higher peaks	Broad or Focal	Amplitude Threshold	TCGA-DU-A76K-01A-11D-A33S-01	TCGA-DU-6399-01A-12D-1704-01	TCGA-HW-7489-01A-11D-2023-01	TCGA-DU-6397-01A-11D-1704-01	TCGA-DH-5140-01A-01D-1466-01	TCGA-DU-7304-01A-12D-2085-01	TCGA-VM-A8CE-01A-11D-A36N-01	TCGA-DB-A75M-01A-11D-A32A-01	TCGA-QH-A86X-01A-11D-A36N-01	TCGA-QH-A65Z-01A-11D-A323-01	TCGA-EZ-7264-01A-11D-2023-01	TCGA-DU-7309-01A-11D-2085-01	TCGA-HT-7694-01A-11D-2252-01	TCGA-QH-A6X4-01A-51D-A32A-01	TCGA-P5-A733-01A-11D-A32A-01	TCGA-P5-A5EZ-01A-11D-A27J-01	TCGA-DH-A7UR-01A-11D-A33S-01	TCGA-TQ-A7RW-01A-11D-A33S-01	TCGA-HT-7620-01A-11D-2252-01	TCGA-DU-6396-01A-11D-1704-01	TCGA-TQ-A7RO-01A-11D-A33S-01	TCGA-P5-A730-01A-11D-A32A-01	TCGA-DB-5277-01A-01D-1466-01	TCGA-DU-A6S2-01A-21D-A32A-01	TCGA-P5-A5F0-01A-11D-A288-01	TCGA-E1-A7Z4-01A-11D-A34I-01	TCGA-DU-5871-01A-12D-1704-01	TCGA-FG-A713-01A-11D-A32A-01	TCGA-HW-A5KL-01A-11D-A27J-01	TCGA-HT-7611-01A-11D-2391-01	TCGA-DU-A5TS-01A-11D-A288-01	TCGA-E1-A7YL-01A-11D-A349-01	TCGA-DU-6393-01A-11D-1704-01	TCGA-RY-A840-01A-11D-A36N-01	TCGA-S9-A6TS-01A-12D-A33S-01	TCGA-TM-A7C3-01A-11D-A32A-01	TCGA-P5-A72W-01A-11D-A32A-01	TCGA-QH-A6X5-01A-12D-A32A-01	TCGA-E1-A7Z3-01A-11D-A34I-01	TCGA-HT-7474-01A-11D-2023-01	TCGA-HT-7856-01A-11D-2391-01
Amplification Peak 1	1p36.12	chr1:22356733-23330156(probes 11501:12092)	chr1:23154092-23259231(probes 12000:12060)	chr1:23154092-23277396(probes 12000:12063)	0.20272	0.20272		0: t<0.1; 1: 0.1<t< 0.9; 2: t>0.9	0	0	0	0	0	0	0	0	0	0	0	0	0	0	0	0	0	0	0	0	0	0	0	0	0	0	0	0	0	0	0	0	0	0	0	0	0	0	0	0	0
Amplification Peak 2	1p31.1	chr1:49431323-111457721(probes 26584:66996)	chr1:74803601-74850803(probes 43468:43488)	chr1:74803601-74860713(probes 43468:43491)	0.23845	0.23845		0: t<0.1; 1: 0.1<t< 0.9; 2: t>0.9	0	0	0	0	0	0	0	0	0	0	0	0	0	0	0	0	0	0	0	0	0	0	1	0	0	0	0	0	0	0	0	0	0	0	0	0	0	0	0	0	0
Amplification Peak 3	1q22	chr1:156428190-156626306(probes 76163:76274)	chr1:156429152-156476087(probes 76164:76182)	chr1:156094090-156932124(probes 76004:76403)	0.0059835	0.0059835		0: t<0.1; 1: 0.1<t< 0.9; 2: t>0.9	0	0	0	0	0	1	0	0	0	0	0	0	0	0	0	0	0	0	0	1	0	0	0	0	0	0	0	0	0	0	2	0	0	0	0	1	0	0	1	1	0
Amplification Peak 4	1q32.1	chr1:204340511-204347299(probes 108821:108823)	chr1:204342466-204345090(probes 108822:108822)	chr1:203226562-205263008(probes 108063:109549)	1.3307e-09	1.3307e-09		0: t<0.1; 1: 0.1<t< 0.9; 2: t>0.9	0	0	0	0	0	1	0	0	0	0	0	0	0	0	0	0	0	0	0	0	0	0	1	0	0	0	0	0	0	0	0	0	0	0	0	2	0	0	0	1	0
Amplification Peak 5	1q42.3	chr1:234852274-234871308(probes 130041:130053)	chr1:234853182-234869762(probes 130042:130052)	chr1:234853182-234872570(probes 130042:130055)	0.036008	0.045731		0: t<0.1; 1: 0.1<t< 0.9; 2: t>0.9	0	0	0	0	0	1	0	0	0	0	0	0	0	0	0	0	0	0	0	0	0	0	1	0	0	0	0	0	0	0	0	0	0	0	0	0	0	0	0	1	0
Amplification Peak 6	1q43	chr1:241903683-245642345(probes 135467:137879)	chr1:243444281-243523610(probes 136376:136449)	chr1:243192160-244467897(probes 136248:137126)	0.12791	0.16646		0: t<0.1; 1: 0.1<t< 0.9; 2: t>0.9	0	0	0	0	0	1	0	0	0	0	0	0	0	0	0	0	0	0	0	0	0	0	1	0	0	0	0	0	0	0	0	0	0	0	0	0	0	0	0	1	0
Amplification Peak 7	2p24.3	chr2:15916056-16177446(probes 150279:150390)	chr2:16086759-16177241(probes 150383:150389)	chr2:15746231-16244087(probes 150128:150441)	0.0017189	0.0017189		0: t<0.1; 1: 0.1<t< 0.9; 2: t>0.9	0	0	0	0	0	0	0	0	0	0	0	0	0	0	0	0	1	0	0	0	0	0	1	0	0	0	0	0	0	0	0	0	0	0	0	0	0	0	0	0	0
Amplification Peak 8	2p16.3	chr2:50636136-51136216(probes 173185:173307)	chr2:50636525-51133336(probes 173186:173306)	chr2:50636525-51136260(probes 173186:173309)	0.055553	0.055553		0: t<0.1; 1: 0.1<t< 0.9; 2: t>0.9	0	0	0	0	0	0	0	0	0	0	0	0	0	0	0	0	1	0	0	0	0	0	2	0	0	0	0	0	0	0	0	0	0	0	0	0	0	0	0	0	0
Amplification Peak 9	2p12	chr2:74925804-75002103(probes 188000:188040)	chr2:74927810-74999662(probes 188001:188039)	chr2:74927810-75005704(probes 188001:188042)	9.1227e-05	9.1227e-05		0: t<0.1; 1: 0.1<t< 0.9; 2: t>0.9	0	0	0	0	0	0	0	0	0	0	0	0	0	0	0	0	1	0	0	0	0	0	0	0	0	0	0	0	0	0	0	0	0	0	0	0	0	0	0	0	0
Amplification Peak 10	2q24.2	chr2:159099064-159108039(probes 233083:233094)	chr2:159099247-159108003(probes 233084:233093)	chr2:159099247-159108647(probes 233084:233096)	0.02233	0.02233		0: t<0.1; 1: 0.1<t< 0.9; 2: t>0.9	0	0	0	0	0	0	0	0	0	0	0	0	0	0	0	0	0	0	0	0	0	0	0	0	0	0	0	0	0	0	0	0	0	0	0	0	0	0	0	0	0
Amplification Peak 11	2q24.2	chr2:160339472-160361647(probes 233928:233940)	chr2:160340000-160361023(probes 233929:233939)	chr2:160340000-160363054(probes 233929:233942)	1.2517e-09	1.2517e-09		0: t<0.1; 1: 0.1<t< 0.9; 2: t>0.9	0	0	0	0	0	0	0	0	0	0	0	0	0	0	0	0	0	0	0	0	0	0	0	0	0	0	0	0	0	0	0	0	0	0	0	0	0	0	0	0	0
Amplification Peak 12	2q32.1	chr2:184283698-184309200(probes 248923:248938)	chr2:184286589-184306639(probes 248924:248937)	chr2:184286589-184311539(probes 248924:248940)	0.00036091	0.00036091		0: t<0.1; 1: 0.1<t< 0.9; 2: t>0.9	0	0	0	0	0	0	0	0	0	0	0	0	0	0	0	0	0	0	0	0	0	0	0	0	0	0	0	0	0	0	0	0	0	0	0	0	0	0	0	0	0
Amplification Peak 13	3p25.3	chr3:1-44783513(probes 283833:311511)	chr3:11406400-11421149(probes 289999:290000)	chr3:11406400-11425353(probes 289999:290003)	0.2458	0.2458		0: t<0.1; 1: 0.1<t< 0.9; 2: t>0.9	0	0	0	0	0	1	0	0	0	0	0	0	0	0	0	1	0	2	0	0	0	0	1	0	0	0	1	0	0	0	0	0	0	0	0	0	0	0	0	0	0
Amplification Peak 14	3q26.33	chr3:178113820-182014388(probes 389236:391510)	chr3:181698498-181709142(probes 391320:391320)	chr3:178119434-182015312(probes 389237:391512)	0.0043952	0.0043952		0: t<0.1; 1: 0.1<t< 0.9; 2: t>0.9	0	0	0	1	0	0	0	0	0	0	0	0	0	0	0	0	0	1	0	0	0	0	0	0	0	0	0	0	0	0	0	2	0	0	0	0	0	0	0	0	0
Amplification Peak 15	4p16.3	chr4:1777070-1815700(probes 401149:401160)	chr4:1777075-1814962(probes 401150:401159)	chr4:1777075-1825245(probes 401150:401167)	0.018734	0.018734		0: t<0.1; 1: 0.1<t< 0.9; 2: t>0.9	0	0	0	0	0	0	0	0	0	0	0	0	0	0	0	1	0	0	0	0	0	0	1	0	0	0	0	0	0	0	1	0	0	0	0	0	0	0	0	0	0
Amplification Peak 16	4q12	chr4:52878830-52910638(probes 431760:431773)	chr4:52879758-52907703(probes 431761:431772)	chr4:48067891-61350938(probes 431195:437373)	2.9112e-12	8.3327e-05		0: t<0.1; 1: 0.1<t< 0.9; 2: t>0.9	0	0	0	0	0	0	0	0	0	0	1	1	0	0	0	0	0	0	0	0	0	0	1	0	0	0	0	0	0	0	0	0	0	0	0	0	0	0	0	0	1
Amplification Peak 17	4q12	chr4:54138220-54176172(probes 432585:432600)	chr4:54142148-54172521(probes 432586:432599)	chr4:48067891-61350938(probes 431195:437373)	1.1839e-28	1.4329e-25		0: t<0.1; 1: 0.1<t< 0.9; 2: t>0.9	0	0	0	0	0	0	0	0	0	0	0	1	0	0	0	0	0	0	0	0	0	0	2	0	0	0	0	0	0	0	0	1	0	0	0	0	0	0	0	0	1
Amplification Peak 18	4q28.1	chr4:124720152-124724948(probes 475569:475584)	chr4:124720174-124724813(probes 475570:475583)	chr4:124720174-124725028(probes 475570:475586)	2.8116e-08	2.8116e-08		0: t<0.1; 1: 0.1<t< 0.9; 2: t>0.9	2	0	0	0	0	0	0	0	0	0	0	0	0	0	0	0	0	0	0	0	0	0	0	0	0	0	0	0	0	0	0	0	0	0	0	0	0	0	0	0	0
Amplification Peak 19	5p15.33	chr5:1287426-1308958(probes 512200:512208)	chr5:1287589-1308436(probes 512201:512207)	chr5:1287589-1313551(probes 512201:512210)	0.14558	0.14558		0: t<0.1; 1: 0.1<t< 0.9; 2: t>0.9	0	0	0	0	0	0	0	0	0	0	0	0	0	0	0	0	0	0	0	0	0	0	0	0	0	0	0	0	0	0	0	0	0	0	1	1	0	0	0	0	0
Amplification Peak 20	6p21.31	chr6:35690565-37949576(probes 643252:644712)	chr6:35691118-36369658(probes 643253:643667)	chr6:35691118-37957129(probes 643253:644714)	0.067348	0.13217		0: t<0.1; 1: 0.1<t< 0.9; 2: t>0.9	0	0	0	1	0	0	0	0	0	0	0	0	0	0	0	1	0	0	0	0	0	0	0	0	0	0	0	0	0	0	0	0	1	0	0	0	0	0	0	0	0
Amplification Peak 21	6p21.2	chr6:38771159-39770036(probes 645286:646016)	chr6:38774933-38855128(probes 645287:645346)	chr6:38774933-39771396(probes 645287:646018)	0.051148	0.10677		0: t<0.1; 1: 0.1<t< 0.9; 2: t>0.9	0	0	0	0	0	0	0	0	0	0	0	0	0	0	0	1	0	0	0	0	0	0	0	0	0	0	0	0	0	0	0	0	0	0	0	0	0	0	0	0	0
Amplification Peak 22	6p21.1	chr6:41714528-41744713(probes 647542:647562)	chr6:41714544-41743583(probes 647543:647561)	chr6:41714544-41749966(probes 647543:647564)	0.11647	0.22453		0: t<0.1; 1: 0.1<t< 0.9; 2: t>0.9	0	0	0	0	0	0	0	0	0	0	0	0	0	0	0	1	0	0	0	0	0	0	0	0	0	0	0	0	0	0	0	0	0	0	0	0	0	0	0	0	0
Amplification Peak 23	6p21.1	chr6:41870042-42013132(probes 647613:647692)	chr6:41874062-42012693(probes 647614:647691)	chr6:41874062-42015268(probes 647614:647694)	0.11647	0.22453		0: t<0.1; 1: 0.1<t< 0.9; 2: t>0.9	0	0	0	0	0	0	0	0	0	0	0	0	0	0	0	1	0	0	0	0	0	0	0	0	0	0	0	0	0	0	0	0	1	0	0	0	0	0	0	0	0
Amplification Peak 24	6p21.1	chr6:42736382-42796758(probes 648111:648141)	chr6:42791113-42796458(probes 648138:648140)	chr6:42739893-42802412(probes 648112:648143)	0.12329	0.2126		0: t<0.1; 1: 0.1<t< 0.9; 2: t>0.9	0	0	0	0	0	0	0	0	0	0	0	0	0	0	0	0	0	0	0	0	0	0	0	0	0	0	0	0	0	0	0	0	1	0	0	0	0	0	0	0	0
Amplification Peak 25	6q21	chr6:106791533-107057044(probes 685445:685528)	chr6:106793181-107051837(probes 685446:685527)	chr6:106793181-107059528(probes 685446:685530)	0.023306	0.023306		0: t<0.1; 1: 0.1<t< 0.9; 2: t>0.9	0	0	0	0	0	0	0	0	0	0	0	0	0	0	0	0	0	0	0	0	0	0	1	0	0	0	0	0	0	0	0	0	0	0	0	0	0	0	0	0	0
Amplification Peak 26	7p12.2	chr7:48975035-52994172(probes 756590:759593)	chr7:50440893-50498391(probes 757582:757633)	chr7:48975719-52999796(probes 756591:759595)	0.013217	0.067348		0: t<0.1; 1: 0.1<t< 0.9; 2: t>0.9	1	0	0	0	0	0	0	0	0	0	0	0	0	0	0	0	0	0	0	0	0	0	1	0	1	0	0	0	0	0	0	1	0	0	0	2	0	0	0	0	0
Amplification Peak 27	7p11.2	chr7:54876881-55037263(probes 760851:760971)	chr7:54876971-55014481(probes 760852:760938)	chr7:53737871-63677724(probes 760059:761972)	3.4188e-42	2.9116e-41		0: t<0.1; 1: 0.1<t< 0.9; 2: t>0.9	1	0	0	0	0	0	0	0	0	0	0	0	0	0	0	0	0	0	0	0	0	0	1	0	1	0	0	0	0	0	0	1	0	0	0	2	0	0	0	0	0
Amplification Peak 28	7p11.2	chr7:56356124-56535784(probes 761812:761868)	chr7:56357047-56535438(probes 761813:761867)	chr7:53737871-63677724(probes 760059:761972)	3.2791e-06	0.13217		0: t<0.1; 1: 0.1<t< 0.9; 2: t>0.9	1	0	0	0	0	0	0	0	0	0	0	0	0	0	0	0	0	0	0	0	0	0	0	0	1	0	0	0	0	0	0	1	0	0	0	1	0	0	0	0	0
Amplification Peak 29	7q21.2	chr7:92245373-92901034(probes 777092:777623)	chr7:92551065-92665128(probes 777232:777343)	chr7:92127066-93652404(probes 777047:778029)	0.0033175	0.0041639		0: t<0.1; 1: 0.1<t< 0.9; 2: t>0.9	1	1	0	0	0	0	0	0	0	0	0	0	0	0	0	0	0	0	0	0	0	0	1	0	1	0	0	0	0	0	0	1	0	0	0	1	0	0	1	0	0
Amplification Peak 30	7q32.3	chr7:130248495-132731700(probes 798920:800590)	chr7:130883698-131032963(probes 799212:799322)	chr7:129968187-132732644(probes 798804:800592)	0.0049897	0.04195		0: t<0.1; 1: 0.1<t< 0.9; 2: t>0.9	1	1	0	0	0	0	0	0	0	0	0	1	0	0	1	1	0	1	0	0	0	0	0	0	1	0	0	0	0	0	0	1	0	0	0	2	0	0	1	0	0
Amplification Peak 31	7q34	chr7:142554532-142768622(probes 806952:806964)	chr7:142554631-142581255(probes 806953:806963)	chr7:142544397-142810691(probes 806951:806966)	2.2495e-05	6.4355e-05		0: t<0.1; 1: 0.1<t< 0.9; 2: t>0.9	1	1	0	0	0	0	0	0	0	0	0	1	0	2	1	1	0	1	0	0	0	0	0	0	1	0	0	0	0	0	0	1	0	0	0	1	0	0	1	0	0
Amplification Peak 32	8q24.21	chr8:121868709-132153675(probes 891570:898842)	chr8:129390327-129441879(probes 896870:896902)	chr8:104937662-145138636(probes 880969:906457)	1.5782e-06	1.5782e-06		0: t<0.1; 1: 0.1<t< 0.9; 2: t>0.9	0	1	1	0	0	1	0	0	0	0	0	0	0	0	0	0	0	1	0	0	0	0	2	0	0	0	1	0	0	0	1	0	0	0	0	0	2	0	0	0	0
Amplification Peak 33	9p24.1	chr9:7997400-8024196(probes 911901:911915)	chr9:8000287-8021064(probes 911902:911914)	chr9:8000287-8025032(probes 911902:911917)	0.151	0.151		0: t<0.1; 1: 0.1<t< 0.9; 2: t>0.9	0	0	0	0	0	0	0	0	0	0	0	0	0	0	0	0	0	0	0	0	0	0	0	0	0	0	1	0	0	0	0	0	0	0	0	0	0	0	0	1	0
Amplification Peak 34	9p13.3	chr9:34794594-36967961(probes 929971:931235)	chr9:35551637-35627492(probes 930355:930384)	chr9:35536850-35933325(probes 930347:930535)	0.11647	0.11647		0: t<0.1; 1: 0.1<t< 0.9; 2: t>0.9	0	0	0	0	0	0	0	0	0	0	0	0	0	0	0	0	0	0	0	0	0	0	0	0	0	0	1	0	0	0	0	0	0	0	0	0	0	0	0	1	0
Amplification Peak 35	9q34.3	chr9:122982779-138394717(probes 971980:980379)	chr9:137563957-137839736(probes 980168:980300)	chr9:137414622-138394717(probes 980126:980379)	0.096444	0.096444		0: t<0.1; 1: 0.1<t< 0.9; 2: t>0.9	0	0	0	0	0	1	0	0	0	0	0	0	0	0	0	0	0	0	0	0	0	0	0	0	0	0	0	0	0	0	0	0	0	0	0	0	0	0	1	0	0
Amplification Peak 36	10p15.3	chr10:1-1429569(probes 980380:980914)	chr10:985048-1006307(probes 980741:980754)	chr10:1-6406807(probes 980380:984886)	0.0006451	0.0006451		0: t<0.1; 1: 0.1<t< 0.9; 2: t>0.9	0	0	1	0	0	2	0	1	0	0	0	1	0	0	0	2	0	0	0	1	0	0	1	0	0	0	1	0	0	1	1	0	0	0	0	0	0	0	0	0	0
Amplification Peak 37	11q21	chr11:96069560-96214119(probes 1124139:1124265)	chr11:96084036-96205346(probes 1124145:1124263)	chr11:96084036-96214338(probes 1124145:1124266)	0.1768	0.18092		0: t<0.1; 1: 0.1<t< 0.9; 2: t>0.9	0	0	0	1	0	1	0	0	0	0	0	1	0	1	0	0	1	1	0	0	0	0	2	0	0	0	1	0	0	0	0	0	1	1	0	0	1	0	1	1	0
Amplification Peak 38	11q24.1	chr11:117988132-128672305(probes 1139257:1147243)	chr11:121408316-121518623(probes 1141671:1141733)	chr11:116834853-135086622(probes 1138502:1150958)	4.2849e-05	0.0050841		0: t<0.1; 1: 0.1<t< 0.9; 2: t>0.9	0	0	0	1	0	1	0	0	0	0	0	1	0	0	0	0	0	1	0	0	0	0	1	0	0	0	1	0	0	0	0	0	1	1	0	0	1	0	1	1	0
Amplification Peak 39	11q25	chr11:131106864-131117834(probes 1148753:1148775)	chr11:131107513-131117639(probes 1148754:1148774)	chr11:116834853-135086622(probes 1138502:1150958)	1.2126e-05	0.0008435		0: t<0.1; 1: 0.1<t< 0.9; 2: t>0.9	0	0	0	1	0	2	0	0	0	0	0	1	0	0	0	0	0	1	0	0	0	0	1	0	0	0	1	0	0	0	0	0	1	1	0	0	1	0	1	1	0
Amplification Peak 40	12p13.33	chr12:2341300-2395869(probes 1151626:1151679)	chr12:2343923-2393715(probes 1151628:1151678)	chr12:1-11702355(probes 1150959:1157430)	4.6601e-10	0.00012249		0: t<0.1; 1: 0.1<t< 0.9; 2: t>0.9	0	0	1	0	0	1	0	0	0	0	1	0	0	0	0	0	0	0	0	1	0	0	2	0	0	0	1	0	0	0	2	0	0	0	0	0	0	0	0	0	0
Amplification Peak 41	12p13.32	chr12:3912358-3955080(probes 1152701:1152736)	chr12:3914145-3954989(probes 1152702:1152735)	chr12:1-11702355(probes 1150959:1157430)	3.4642e-13	2.6389e-09		0: t<0.1; 1: 0.1<t< 0.9; 2: t>0.9	0	2	1	0	0	1	0	0	0	0	1	0	0	0	0	0	0	0	0	1	0	0	2	0	0	0	1	0	0	0	2	0	0	0	0	0	0	0	0	0	0
Amplification Peak 42	12p12.1	chr12:21539025-21557219(probes 1163813:1163828)	chr12:21539182-21556684(probes 1163814:1163827)	chr12:21306943-25654485(probes 1163652:1166572)	0.0025124	0.0025124		0: t<0.1; 1: 0.1<t< 0.9; 2: t>0.9	0	0	0	0	0	0	0	0	0	0	0	0	0	0	0	0	0	0	0	0	0	0	1	0	0	0	0	0	0	0	0	0	0	0	0	0	0	0	0	0	0
Amplification Peak 43	12q13.12	chr12:50388331-50715346(probes 1178396:1178534)	chr12:50388994-50456156(probes 1178397:1178417)	chr12:50388994-50725656(probes 1178397:1178539)	0.0065134	0.0065134		0: t<0.1; 1: 0.1<t< 0.9; 2: t>0.9	0	0	0	0	0	0	0	0	0	0	0	0	0	0	0	0	0	0	0	0	0	0	0	0	0	0	0	0	0	0	0	0	0	0	0	0	0	0	0	0	0
Amplification Peak 44	12q14.1	chr12:57731613-57762726(probes 1182368:1182383)	chr12:57731656-57762597(probes 1182369:1182382)	chr12:57174359-59337876(probes 1182143:1183515)	7.1822e-57	1.0811e-55		0: t<0.1; 1: 0.1<t< 0.9; 2: t>0.9	0	0	0	0	0	0	0	0	0	0	0	0	0	0	0	2	0	0	0	0	0	0	0	0	0	0	0	0	0	0	0	2	0	0	0	2	0	0	0	0	0
Amplification Peak 45	12q14.1	chr12:58455940-58479055(probes 1182866:1182880)	chr12:58456464-58478774(probes 1182867:1182879)	chr12:57174359-59337876(probes 1182143:1183515)	5.0211e-08	0.0025324		0: t<0.1; 1: 0.1<t< 0.9; 2: t>0.9	0	0	0	0	0	0	0	0	0	0	0	0	0	0	0	0	0	0	0	0	0	0	0	0	0	0	0	0	0	0	0	0	0	0	0	0	0	0	0	0	0
Amplification Peak 46	12q14.3	chr12:64697535-64945573(probes 1186697:1186843)	chr12:64697635-64755025(probes 1186698:1186727)	chr12:64697635-64946907(probes 1186698:1186845)	0.11965	0.16646		0: t<0.1; 1: 0.1<t< 0.9; 2: t>0.9	0	0	0	0	0	0	0	0	0	0	0	0	0	0	0	0	0	0	0	0	0	0	0	0	0	0	0	0	0	0	0	0	0	0	0	0	0	0	0	0	0
Amplification Peak 47	12q15	chr12:68764829-68866975(probes 1189479:1189566)	chr12:68768722-68866647(probes 1189482:1189565)	chr12:68644391-69552573(probes 1189421:1190014)	0.00015865	0.00085953		0: t<0.1; 1: 0.1<t< 0.9; 2: t>0.9	0	0	0	0	0	0	0	0	0	0	0	0	0	0	0	0	0	0	0	0	0	0	0	0	0	0	0	0	0	0	0	0	0	0	0	0	0	0	0	0	0
Amplification Peak 48	12q15	chr12:69769597-69787646(probes 1190190:1190196)	chr12:69773385-69787575(probes 1190191:1190195)	chr12:69713867-69866039(probes 1190164:1190232)	0.0014658	0.017266		0: t<0.1; 1: 0.1<t< 0.9; 2: t>0.9	0	0	0	0	0	0	0	0	0	0	0	0	0	0	0	0	0	0	0	0	0	0	0	0	0	0	0	0	0	0	0	0	0	0	0	0	0	0	0	0	0
Amplification Peak 49	12q21.1	chr12:71630601-71654761(probes 1191384:1191391)	chr12:71630942-71654578(probes 1191385:1191390)	chr12:71591762-71883721(probes 1191353:1191507)	0.0068011	0.013788		0: t<0.1; 1: 0.1<t< 0.9; 2: t>0.9	0	0	0	0	0	0	0	0	0	0	0	0	0	0	0	0	0	0	0	0	0	0	0	0	0	0	0	0	0	0	0	0	0	0	0	0	0	0	0	0	0
Amplification Peak 50	12q24.21	chr12:114685071-114768559(probes 1218908:1218963)	chr12:114685214-114766181(probes 1218909:1218962)	chr12:114685214-114780716(probes 1218909:1218965)	0.05782	0.151		0: t<0.1; 1: 0.1<t< 0.9; 2: t>0.9	0	0	0	0	0	0	0	0	0	0	0	0	0	0	0	0	0	0	0	0	0	0	0	0	0	0	0	0	1	0	0	0	0	0	0	0	0	0	0	0	0
Amplification Peak 51	12q24.31	chr12:123723022-123831543(probes 1224454:1224495)	chr12:123771352-123825984(probes 1224478:1224494)	chr12:123625823-123832367(probes 1224450:1224497)	0.0035993	0.013788		0: t<0.1; 1: 0.1<t< 0.9; 2: t>0.9	0	0	0	1	0	0	0	0	1	0	0	0	0	0	0	0	0	0	0	0	0	0	0	0	1	0	0	0	0	0	0	0	0	0	0	0	0	0	0	0	0
Amplification Peak 52	12q24.33	chr12:128905470-129044361(probes 1227991:1228119)	chr12:128936744-129044041(probes 1228015:1228118)	chr12:128905470-129045821(probes 1227991:1228121)	0.0051698	0.019565		0: t<0.1; 1: 0.1<t< 0.9; 2: t>0.9	0	0	0	0	0	0	0	0	0	0	0	0	0	0	0	0	0	0	0	0	0	0	0	0	0	0	0	0	1	0	0	0	0	0	0	0	0	0	0	0	0
Amplification Peak 53	13q34	chr13:107961957-110429710(probes 1287271:1289277)	chr13:109636621-109716929(probes 1288618:1288686)	chr13:106348575-110955783(probes 1285979:1289674)	0.00028549	0.00028549		0: t<0.1; 1: 0.1<t< 0.9; 2: t>0.9	0	0	0	0	0	0	0	0	0	0	0	0	0	0	0	0	0	0	0	0	0	0	1	0	0	0	0	0	0	1	0	0	0	0	0	1	0	0	0	0	0
Amplification Peak 54	14q32.2	chr14:97686705-97694334(probes 1340349:1340361)	chr14:97686718-97690507(probes 1340350:1340360)	chr14:97686718-97694865(probes 1340350:1340363)	0.17146	0.17146		0: t<0.1; 1: 0.1<t< 0.9; 2: t>0.9	0	0	0	0	0	0	0	0	0	0	0	0	0	0	0	0	0	0	0	0	0	0	1	0	0	0	0	0	0	0	0	0	0	0	0	0	1	0	0	0	0
Amplification Peak 55	15q26.3	chr15:98164092-100208002(probes 1390573:1392008)	chr15:98867884-99148671(probes 1391097:1391322)	chr15:98333396-99248260(probes 1390701:1391388)	0.034568	0.034568		0: t<0.1; 1: 0.1<t< 0.9; 2: t>0.9	0	1	0	0	0	0	0	0	0	0	0	0	0	0	0	1	0	1	0	0	0	0	1	0	0	0	0	0	0	0	0	0	0	0	0	0	0	0	0	0	0
Amplification Peak 56	16p13.2	chr16:8821049-9134674(probes 1397729:1397917)	chr16:8831870-9132512(probes 1397730:1397916)	chr16:8831870-9142441(probes 1397730:1397919)	0.009082	0.009082		0: t<0.1; 1: 0.1<t< 0.9; 2: t>0.9	0	0	0	0	0	0	0	0	0	0	0	0	0	0	0	0	0	0	0	0	0	0	0	0	0	0	0	0	0	0	0	0	1	0	1	0	0	0	0	0	0
Amplification Peak 57	17q23.2	chr17:62969370-63016546(probes 1468501:1468516)	chr17:62969904-63015391(probes 1468502:1468515)	chr17:62969904-63019812(probes 1468502:1468518)	0.007639	0.032107		0: t<0.1; 1: 0.1<t< 0.9; 2: t>0.9	0	1	0	0	0	1	0	0	0	0	0	0	0	0	0	0	0	0	0	0	0	0	0	0	0	0	0	0	0	0	0	0	0	1	1	0	0	0	0	0	0
Amplification Peak 58	17q25.1	chr17:59577305-83257441(probes 1466863:1480108)	chr17:76579533-76602874(probes 1477094:1477114)	chr17:75237207-76739259(probes 1476518:1477192)	0.045731	0.23243		0: t<0.1; 1: 0.1<t< 0.9; 2: t>0.9	0	1	0	1	1	1	0	0	1	0	0	0	0	0	0	0	0	0	0	1	0	1	0	1	0	0	0	0	0	0	0	0	1	2	1	0	0	0	0	0	0
Amplification Peak 59	19p13.3	chr19:713557-807591(probes 1526500:1526511)	chr19:715431-804395(probes 1526501:1526510)	chr19:1-1228277(probes 1526377:1526605)	9.1227e-05	9.1227e-05		0: t<0.1; 1: 0.1<t< 0.9; 2: t>0.9	1	0	0	1	0	0	1	0	1	0	0	0	0	0	0	0	0	0	0	0	0	1	0	1	0	0	0	0	0	0	0	1	1	1	0	1	0	0	0	0	0
Deletion Peak 1	1p36.32	chr1:4424273-5565505(probes 731:1716)	chr1:4648928-4780902(probes 959:1082)	chr1:1-12567449(probes 1:5659)	0.00026486	0.087069		0: t>-0.1; 1: -0.1>t> -1.3; 2: t< -1.3	0	0	0	1	0	0	1	0	1	1	1	0	1	1	0	1	1	0	1	1	1	1	0	1	1	0	1	1	0	0	0	0	1	1	1	0	1	1	0	0	1
Deletion Peak 2	1p36.23	chr1:8024758-8318933(probes 3272:3437)	chr1:8208119-8218751(probes 3370:3376)	chr1:1-12567449(probes 1:5659)	4.2652e-06	0.00093323		0: t>-0.1; 1: -0.1>t> -1.3; 2: t< -1.3	1	0	0	1	0	0	1	0	1	1	1	0	1	1	0	1	1	0	1	1	1	1	0	1	1	0	1	1	0	0	0	0	1	1	1	0	1	1	0	0	1
Deletion Peak 3	1p32.3	chr1:50414095-51063392(probes 27031:27243)	chr1:50956568-50976325(probes 27202:27206)	chr1:50551342-51130755(probes 27093:27265)	1.4913e-05	1.9023e-05		0: t>-0.1; 1: -0.1>t> -1.3; 2: t< -1.3	1	0	0	1	0	0	1	0	1	1	1	0	1	1	0	0	1	0	1	0	1	1	0	1	1	0	0	1	0	0	0	1	1	1	1	0	0	1	0	0	1
Deletion Peak 4	1q43	chr1:211843986-248956422(probes 114108:139258)	chr1:240770596-241359174(probes 134534:135006)	chr1:240023016-242725208(probes 133932:136036)	0.013434	0.10478		0: t>-0.1; 1: -0.1>t> -1.3; 2: t< -1.3	0	0	0	0	0	0	0	0	0	0	0	0	0	0	0	0	0	1	0	1	0	0	0	0	0	0	1	0	1	0	1	0	0	0	1	0	0	0	0	0	0
Deletion Peak 5	1q44	chr1:245118965-248956422(probes 137493:139258)	chr1:247600556-248956422(probes 139233:139258)	chr1:244315306-248956422(probes 137021:139258)	0.0042739	0.075328		0: t>-0.1; 1: -0.1>t> -1.3; 2: t< -1.3	0	0	0	0	0	0	0	0	0	0	0	0	0	0	0	0	0	1	0	1	0	0	0	0	0	0	1	0	1	0	1	0	0	0	1	0	0	0	0	0	0
Deletion Peak 6	2p25.3	chr2:1-2895405(probes 139259:140213)	chr2:686939-1913831(probes 139451:139452)	chr2:1-1914587(probes 139259:139455)	0.063706	0.063706		0: t>-0.1; 1: -0.1>t> -1.3; 2: t< -1.3	0	0	0	0	0	0	0	0	0	0	0	1	0	0	1	0	0	0	0	1	0	0	1	0	0	1	1	0	0	0	1	0	0	0	1	0	0	0	0	0	0
Deletion Peak 7	2q37.1	chr2:233207094-233619817(probes 278377:278628)	chr2:233305955-233349893(probes 278440:278472)	chr2:226832258-242193529(probes 274798:283832)	9.9196e-19	2.4441e-05		0: t>-0.1; 1: -0.1>t> -1.3; 2: t< -1.3	0	0	0	0	0	1	0	0	0	0	0	1	0	0	1	0	1	1	0	1	0	0	1	0	0	0	0	0	0	0	0	0	0	0	0	0	1	0	0	0	0
Deletion Peak 8	2q37.3	chr2:241512301-242193529(probes 283816:283832)	chr2:241532316-242193529(probes 283832:283832)	chr2:226832258-242193529(probes 274798:283832)	1.1944e-24	7.6431e-16		0: t>-0.1; 1: -0.1>t> -1.3; 2: t< -1.3	0	0	0	0	0	1	0	0	0	0	0	1	0	0	1	0	1	1	0	1	0	0	1	0	0	1	1	0	0	0	1	0	0	0	0	0	1	0	0	0	0
Deletion Peak 9	3p21.1	chr3:41239154-84639096(probes 309694:335900)	chr3:52490559-52847219(probes 315121:315295)	chr3:45828390-54172039(probes 312209:316189)	0.0070302	0.0068576		0: t>-0.1; 1: -0.1>t> -1.3; 2: t< -1.3	0	0	0	0	0	0	0	0	0	0	0	0	0	0	0	0	0	0	0	1	0	0	1	0	0	0	0	0	0	0	0	1	0	0	0	0	0	0	0	0	0
Deletion Peak 10	3q13.31	chr3:59049037-137769788(probes 319461:365025)	chr3:116707792-116722086(probes 352132:352139)	chr3:114819367-117459768(probes 350908:352762)	0.068215	0.068445		0: t>-0.1; 1: -0.1>t> -1.3; 2: t< -1.3	1	0	1	0	0	0	0	0	0	0	0	0	0	0	1	0	0	0	0	0	0	0	1	0	0	0	0	0	1	0	0	0	0	0	0	0	0	0	0	0	0
Deletion Peak 11	3q29	chr3:194781676-197302554(probes 399920:400673)	chr3:196043720-196094569(probes 400339:400362)	chr3:186574608-198295559(probes 394149:400919)	6.0376e-09	6.0376e-09		0: t>-0.1; 1: -0.1>t> -1.3; 2: t< -1.3	0	0	0	0	0	0	0	1	0	0	0	0	0	0	1	0	0	0	0	0	0	0	1	0	0	1	0	0	1	0	0	1	0	0	0	0	0	0	0	0	0
Deletion Peak 12	4q31.23	chr4:129110965-155832021(probes 478068:493474)	chr4:148076252-148448454(probes 488925:489196)	chr4:129922366-190214555(probes 478623:512145)	1.0963e-08	0.0031228		0: t>-0.1; 1: -0.1>t> -1.3; 2: t< -1.3	0	1	1	0	0	0	0	0	0	0	1	1	0	1	1	1	0	1	0	0	1	0	1	0	0	0	1	1	0	0	1	0	0	0	1	0	0	0	0	0	1
Deletion Peak 13	4q34.3	chr4:177990720-182139540(probes 507051:509362)	chr4:180603979-181161702(probes 508537:508541)	chr4:129922366-190214555(probes 478623:512145)	1.7595e-17	2.4441e-05		0: t>-0.1; 1: -0.1>t> -1.3; 2: t< -1.3	0	1	1	0	0	1	0	0	0	0	1	1	0	1	1	1	0	1	0	0	1	0	1	0	0	0	1	1	0	0	1	0	0	0	1	0	0	0	0	0	1
Deletion Peak 14	4q35.2	chr4:186719102-190214555(probes 511379:512145)	chr4:187842498-190214555(probes 512145:512145)	chr4:129922366-190214555(probes 478623:512145)	1.5221e-18	2.5301e-08		0: t>-0.1; 1: -0.1>t> -1.3; 2: t< -1.3	0	1	1	0	0	1	0	0	0	0	1	1	0	1	1	1	0	1	0	0	1	0	1	0	0	0	1	1	0	0	1	0	0	0	1	0	0	0	0	0	1
Deletion Peak 15	5p15.33	chr5:1-6310986(probes 512146:516262)	chr5:1428400-1891706(probes 512274:512276)	chr5:1-6696934(probes 512146:516590)	0.00019164	0.00019467		0: t>-0.1; 1: -0.1>t> -1.3; 2: t< -1.3	0	1	0	0	1	0	0	0	0	0	0	0	0	0	0	0	0	0	0	0	0	0	0	0	0	1	0	0	0	0	1	0	0	0	0	0	1	0	0	1	0
Deletion Peak 16	5q34	chr5:156765791-172642578(probes 605343:616195)	chr5:164468639-164545699(probes 610447:610482)	chr5:140664708-181538259(probes 594435:621091)	7.6187e-08	0.00034134		0: t>-0.1; 1: -0.1>t> -1.3; 2: t< -1.3	0	0	0	0	1	0	0	0	0	0	0	0	0	0	0	1	0	0	0	0	0	0	1	0	0	0	0	0	0	0	0	1	0	0	1	0	0	0	0	0	0
Deletion Peak 17	5q35.3	chr5:178197074-178605843(probes 619501:619784)	chr5:178206116-178234900(probes 619502:619524)	chr5:140664708-181538259(probes 594435:621091)	3.3216e-08	0.00011672		0: t>-0.1; 1: -0.1>t> -1.3; 2: t< -1.3	0	1	0	0	1	0	0	0	0	0	0	0	0	0	0	1	0	0	0	0	0	0	1	0	0	0	0	0	0	0	0	0	0	0	1	0	0	0	0	0	0
Deletion Peak 18	6p25.3	chr6:1-1314427(probes 621092:621406)	chr6:1-1014045(probes 621092:621092)	chr6:1-1960675(probes 621092:621916)	0.0040492	0.0041733		0: t>-0.1; 1: -0.1>t> -1.3; 2: t< -1.3	0	0	0	0	0	0	0	0	0	0	0	0	0	0	0	1	0	1	0	0	0	0	1	0	0	1	0	0	0	0	0	0	0	0	0	0	0	0	0	0	0
Deletion Peak 19	6q22.31	chr6:108259005-150021106(probes 686311:712377)	chr6:124280267-124827878(probes 695575:695943)	chr6:123945938-125057006(probes 695410:696108)	0.079536	0.082435		0: t>-0.1; 1: -0.1>t> -1.3; 2: t< -1.3	0	0	0	0	0	0	0	1	0	0	0	0	0	0	0	1	0	1	0	0	0	0	0	0	0	0	0	0	0	0	0	0	0	0	0	0	1	0	0	0	0
Deletion Peak 20	6q26	chr6:163346930-163666898(probes 721641:721848)	chr6:163412504-163580459(probes 721692:721777)	chr6:162847873-163743414(probes 721243:721909)	7.4714e-05	7.9986e-05		0: t>-0.1; 1: -0.1>t> -1.3; 2: t< -1.3	0	0	0	0	0	0	0	1	0	0	0	0	0	0	0	1	0	1	0	0	0	0	0	0	0	1	0	0	0	0	0	0	0	0	0	0	1	0	0	0	0
Deletion Peak 21	7p22.3	chr7:1-4684690(probes 725656:727854)	chr7:1-721089(probes 725656:725666)	chr7:1-4422837(probes 725656:727664)	0.0057255	0.0057734		0: t>-0.1; 1: -0.1>t> -1.3; 2: t< -1.3	0	1	0	1	0	1	0	0	0	0	0	0	0	0	0	0	0	1	0	0	0	0	0	0	0	0	0	0	1	0	0	0	0	0	1	0	0	0	1	0	0
Deletion Peak 22	8p23.2	chr8:2166023-6404670(probes 817237:820314)	chr8:2926897-4996752(probes 817318:819886)	chr8:3958700-3961600(probes 818603:818604)	0.022115	0.022115		0: t>-0.1; 1: -0.1>t> -1.3; 2: t< -1.3	0	0	0	0	1	0	0	0	0	0	0	0	0	0	0	1	0	0	0	0	0	0	1	0	0	0	0	0	0	0	0	0	0	0	1	0	0	0	0	0	0
Deletion Peak 23	8q24.3	chr8:143414185-145138636(probes 906241:906457)	chr8:143565795-143610162(probes 906282:906293)	chr8:142447040-145138636(probes 905887:906457)	0.00087616	0.00089511		0: t>-0.1; 1: -0.1>t> -1.3; 2: t< -1.3	0	0	0	0	1	0	0	0	0	0	0	0	0	0	0	0	0	0	0	0	0	0	0	0	0	0	0	0	0	0	0	0	0	0	0	0	0	0	0	0	0
Deletion Peak 24	9p24.3	chr9:1-844486(probes 906458:906513)	chr9:1-789931(probes 906458:906458)	chr9:1-4903708(probes 906458:909957)	6.0742e-06	7.4351e-05		0: t>-0.1; 1: -0.1>t> -1.3; 2: t< -1.3	0	1	0	1	0	1	0	0	0	0	1	1	0	0	0	1	1	1	0	0	0	0	1	0	0	0	0	0	0	0	1	0	0	0	1	0	1	0	1	0	0
Deletion Peak 25	9p23	chr9:7799607-10619051(probes 911728:913849)	chr9:8310705-10619051(probes 912198:913849)	chr9:8268199-9728353(probes 912164:913173)	1.8285e-06	1.4913e-05		0: t>-0.1; 1: -0.1>t> -1.3; 2: t< -1.3	0	1	0	1	0	1	0	0	0	0	1	1	0	0	0	1	1	1	0	0	0	0	1	0	0	0	0	0	0	0	0	0	0	0	1	0	0	0	1	0	0
Deletion Peak 26	9p21.3	chr9:21865499-21997723(probes 921929:921992)	chr9:21959053-21997723(probes 921979:921992)	chr9:18599718-32318827(probes 919318:928412)	4.847e-79	1.3601e-67		0: t>-0.1; 1: -0.1>t> -1.3; 2: t< -1.3	1	1	0	1	1	1	1	0	0	0	1	1	0	0	0	1	1	1	0	0	0	0	1	0	0	0	0	0	0	0	0	0	0	0	1	0	0	0	1	0	0
Deletion Peak 27	9p21.3	chr9:22449927-23507724(probes 922312:923017)	chr9:22646075-22829484(probes 922441:922567)	chr9:18599718-32318827(probes 919318:928412)	3.0552e-38	2.2624e-06		0: t>-0.1; 1: -0.1>t> -1.3; 2: t< -1.3	1	1	0	1	0	1	1	0	0	0	1	1	0	0	0	1	1	1	0	0	0	0	1	0	0	0	0	0	0	0	0	0	0	0	1	0	0	0	1	0	0
Deletion Peak 28	9q21.11	chr9:37783146-83625561(probes 931741:943612)	chr9:38747692-68531616(probes 932487:932568)	chr9:68478305-68482925(probes 932528:932529)	0.11919	0.11671		0: t>-0.1; 1: -0.1>t> -1.3; 2: t< -1.3	0	0	0	0	0	0	0	0	0	0	1	0	0	0	1	0	0	0	0	0	0	0	0	0	0	0	0	0	0	0	0	0	0	0	0	0	0	0	0	0	0
Deletion Peak 29	10q23.31	chr10:87553251-87819888(probes 1037635:1037827)	chr10:87750473-87819888(probes 1037786:1037827)	chr10:87742067-87869588(probes 1037780:1037869)	0.0021615	0.0021534		0: t>-0.1; 1: -0.1>t> -1.3; 2: t< -1.3	1	1	0	0	1	0	0	0	0	0	0	0	0	0	0	1	0	0	0	1	0	0	1	0	0	1	0	0	0	0	0	1	0	0	1	1	0	0	0	0	0
Deletion Peak 30	10q26.3	chr10:133376759-133400839(probes 1068845:1068856)	chr10:133376926-133393368(probes 1068847:1068855)	chr10:103225280-133797422(probes 1047424:1068862)	1.2064e-19	1.2064e-19		0: t>-0.1; 1: -0.1>t> -1.3; 2: t< -1.3	1	1	0	0	1	0	0	0	0	0	0	0	0	0	0	1	0	0	0	1	0	0	1	0	0	1	0	0	0	0	0	1	0	0	1	1	1	0	0	0	0
Deletion Peak 31	11p15.5	chr11:1-1878794(probes 1068863:1069289)	chr11:1381972-1472378(probes 1069156:1069169)	chr11:1-14777259(probes 1068863:1078473)	6.4175e-17	6.4175e-17		0: t>-0.1; 1: -0.1>t> -1.3; 2: t< -1.3	0	0	0	0	1	0	0	0	0	0	0	1	0	0	0	0	0	0	0	1	0	0	1	0	0	0	1	0	0	0	1	1	0	0	0	1	0	0	0	1	0
Deletion Peak 32	11p12	chr11:38655116-41714729(probes 1094759:1096789)	chr11:40111584-41460785(probes 1095617:1096606)	chr11:40811433-40815698(probes 1096112:1096113)	0.042277	0.041458		0: t>-0.1; 1: -0.1>t> -1.3; 2: t< -1.3	0	0	0	0	1	0	0	0	0	0	0	0	0	0	0	0	0	0	0	1	0	0	1	0	0	0	0	0	0	0	1	1	0	0	0	1	0	0	0	0	0
Deletion Peak 33	11q25	chr11:130915311-135086622(probes 1148612:1150958)	chr11:134245688-135086622(probes 1150945:1150958)	chr11:134188309-135086622(probes 1150912:1150958)	0.11695	0.11671		0: t>-0.1; 1: -0.1>t> -1.3; 2: t< -1.3	0	1	0	0	1	0	0	0	0	0	0	0	0	0	0	0	0	1	0	0	0	0	0	0	0	0	0	0	0	0	0	1	0	0	0	1	0	0	0	0	0
Deletion Peak 34	12p13.33	chr12:1-992097(probes 1150959:1151067)	chr12:1-780735(probes 1150959:1150959)	chr12:1-929599(probes 1150959:1151032)	0.070114	0.12877		0: t>-0.1; 1: -0.1>t> -1.3; 2: t< -1.3	0	0	0	0	0	0	0	0	0	0	0	0	0	0	0	0	0	0	0	0	0	0	0	0	0	0	0	0	0	0	0	0	0	0	0	0	0	0	0	0	0
Deletion Peak 35	12p13.1	chr12:12691300-12768198(probes 1158257:1158299)	chr12:12715371-12727447(probes 1158274:1158276)	chr12:12436591-13187439(probes 1158059:1158378)	0.001787	0.0031362		0: t>-0.1; 1: -0.1>t> -1.3; 2: t< -1.3	0	0	0	0	0	1	0	0	0	0	0	0	0	0	0	0	0	0	0	0	0	0	0	0	0	0	0	0	0	0	0	0	0	0	0	0	0	0	0	0	0
Deletion Peak 36	12q12	chr12:32893588-39295175(probes 1171647:1172261)	chr12:33368173-38909921(probes 1171999:1172046)	chr12:38827291-52830616(probes 1172001:1179845)	0.0020877	0.047374		0: t>-0.1; 1: -0.1>t> -1.3; 2: t< -1.3	0	0	0	0	0	0	0	0	0	0	0	0	0	0	0	1	0	0	0	0	0	0	1	0	0	1	1	0	1	0	0	0	0	0	0	0	1	0	0	1	0
Deletion Peak 37	12q12	chr12:41765153-44508684(probes 1173880:1175188)	chr12:42613726-42718949(probes 1174395:1174469)	chr12:38827291-52830616(probes 1172001:1179845)	9.9286e-07	0.0031228		0: t>-0.1; 1: -0.1>t> -1.3; 2: t< -1.3	0	0	0	0	0	0	0	0	0	0	0	0	0	0	0	1	0	0	0	0	0	0	1	0	0	1	1	0	1	0	0	0	0	0	0	0	1	0	0	1	0
Deletion Peak 38	12q13.11	chr12:47362874-47786724(probes 1176883:1177076)	chr12:47771224-47786724(probes 1177071:1177076)	chr12:38827291-52830616(probes 1172001:1179845)	3.8673e-05	0.009326		0: t>-0.1; 1: -0.1>t> -1.3; 2: t< -1.3	0	0	0	0	0	0	0	0	0	0	0	0	0	0	0	1	0	0	0	0	0	0	1	0	0	1	1	0	1	0	0	0	0	0	0	0	1	0	0	1	0
Deletion Peak 39	12q21.1	chr12:1-133275309(probes 1150959:1229415)	chr12:71337025-71591760(probes 1191262:1191351)	chr12:71542832-71543213(probes 1191307:1191308)	0.20268	0.34041		0: t>-0.1; 1: -0.1>t> -1.3; 2: t< -1.3	0	0	0	0	0	0	0	0	0	0	0	0	0	0	0	1	0	0	0	0	0	0	1	0	0	1	1	0	1	0	0	0	0	0	0	0	1	0	0	1	0
Deletion Peak 40	12q24.11	chr12:109567600-109834639(probes 1216145:1216293)	chr12:109568374-109603766(probes 1216146:1216161)	chr12:108686255-112445562(probes 1215645:1217427)	0.0033709	0.0042739		0: t>-0.1; 1: -0.1>t> -1.3; 2: t< -1.3	0	0	0	0	0	0	0	0	0	0	0	0	0	0	0	1	0	0	0	1	0	0	1	0	0	1	1	0	1	1	0	0	0	0	0	0	1	0	0	1	0
Deletion Peak 41	13q12.11	chr13:1-25246913(probes 1229416:1233315)	chr13:19553746-19953270(probes 1229858:1229859)	chr13:1-29026277(probes 1229416:1236139)	0.0021534	0.0086179		0: t>-0.1; 1: -0.1>t> -1.3; 2: t< -1.3	0	1	0	0	1	0	0	0	0	1	0	0	0	0	0	1	0	1	0	0	0	0	1	0	0	0	0	0	0	1	0	1	0	0	1	1	1	0	1	0	0
Deletion Peak 42	13q14.2	chr13:48707156-59665867(probes 1250283:1255421)	chr13:49906216-51050145(probes 1250929:1250933)	chr13:42146599-92951751(probes 1245612:1276597)	7.864e-06	0.00019467		0: t>-0.1; 1: -0.1>t> -1.3; 2: t< -1.3	0	1	1	0	1	0	0	0	0	1	0	0	1	0	0	1	0	1	0	0	0	0	1	0	0	1	0	0	0	1	1	1	0	0	1	1	1	0	1	0	1
Deletion Peak 43	13q31.1	chr13:60693043-94437493(probes 1256017:1277726)	chr13:79566094-79808117(probes 1268387:1268545)	chr13:42146599-92951751(probes 1245612:1276597)	0.003823	0.026517		0: t>-0.1; 1: -0.1>t> -1.3; 2: t< -1.3	0	1	1	0	1	0	0	0	0	1	0	0	1	0	0	1	0	0	0	0	0	0	1	0	0	1	0	0	0	1	1	1	0	0	1	1	1	0	0	0	1
Deletion Peak 44	13q34	chr13:113928871-114364328(probes 1291232:1291306)	chr13:114221859-114364328(probes 1291306:1291306)	chr13:113892395-114364328(probes 1291220:1291306)	0.0090982	0.009326		0: t>-0.1; 1: -0.1>t> -1.3; 2: t< -1.3	0	1	0	0	1	0	0	0	0	1	0	0	1	0	0	1	0	1	0	0	0	0	0	0	0	0	1	0	0	1	1	1	0	0	1	1	1	0	0	0	1
Deletion Peak 45	14q12	chr14:1-33709197(probes 1291307:1299312)	chr14:26466451-26599957(probes 1294843:1294908)	chr14:26527415-26533292(probes 1294876:1294877)	0.21661	0.21571		0: t>-0.1; 1: -0.1>t> -1.3; 2: t< -1.3	0	1	0	1	1	0	0	0	0	0	0	0	0	0	0	1	0	0	0	0	0	0	0	0	0	0	0	0	0	0	0	1	0	1	1	1	0	0	0	0	0
Deletion Peak 46	14q23.2	chr14:52692735-92119346(probes 1310705:1336204)	chr14:63846344-64229670(probes 1317964:1318190)	chr14:58510832-96129299(probes 1314666:1339233)	0.0049282	0.22992		0: t>-0.1; 1: -0.1>t> -1.3; 2: t< -1.3	0	1	1	1	1	0	0	0	0	0	1	0	0	1	0	1	0	1	0	1	0	0	1	0	0	0	0	0	0	0	0	1	0	1	1	1	0	0	0	0	0
Deletion Peak 47	14q24.3	chr14:55350764-96256281(probes 1312414:1339349)	chr14:74342546-74739601(probes 1324610:1324828)	chr14:58510832-96129299(probes 1314666:1339233)	0.00014685	0.068445		0: t>-0.1; 1: -0.1>t> -1.3; 2: t< -1.3	0	1	1	1	1	0	0	0	0	0	1	0	0	1	0	1	0	1	0	1	0	0	0	0	0	1	0	0	0	0	0	0	0	1	1	1	0	0	0	0	0
Deletion Peak 48	14q32.12	chr14:66496435-107043718(probes 1319698:1344576)	chr14:93711112-93790072(probes 1337212:1337252)	chr14:58510832-96129299(probes 1314666:1339233)	0.0016881	0.12171		0: t>-0.1; 1: -0.1>t> -1.3; 2: t< -1.3	0	1	0	1	1	0	0	0	0	0	1	0	0	1	0	1	0	1	0	1	0	0	0	0	0	1	0	0	0	0	0	0	0	1	1	1	0	0	0	0	0
Deletion Peak 49	15q21.3	chr15:1-62826190(probes 1344577:1368357)	chr15:57217764-57291102(probes 1364033:1364065)	chr15:56955143-57327087(probes 1363904:1364088)	0.054746	0.05691		0: t>-0.1; 1: -0.1>t> -1.3; 2: t< -1.3	0	0	1	0	1	0	0	0	0	0	0	0	0	0	0	1	0	0	0	0	1	0	0	0	0	0	0	0	0	0	0	0	1	0	1	0	0	0	0	0	0
Deletion Peak 50	17q25.3	chr17:82646638-83257441(probes 1479938:1480108)	chr17:82828540-83257441(probes 1480025:1480108)	chr17:82745570-83257441(probes 1479991:1480108)	0.1409	0.14255		0: t>-0.1; 1: -0.1>t> -1.3; 2: t< -1.3	0	0	0	0	0	0	0	1	0	0	0	0	0	0	0	1	0	0	0	0	0	0	0	0	0	0	0	0	0	0	1	0	0	0	0	0	0	0	0	0	0
Deletion Peak 51	18q23	chr18:77990855-80373285(probes 1525464:1526376)	chr18:79063009-80373285(probes 1526239:1526376)	chr18:79025790-80373285(probes 1526184:1526376)	0.076162	0.075328		0: t>-0.1; 1: -0.1>t> -1.3; 2: t< -1.3	0	0	1	0	1	0	0	0	0	1	0	0	0	0	0	1	0	1	0	0	0	0	0	0	0	1	0	0	0	0	0	0	1	1	1	0	0	0	0	0	0
Deletion Peak 52	19q13.31	chr19:44032909-44434615(probes 1545783:1546018)	chr19:44050627-44074022(probes 1545800:1545813)	chr19:41383356-58617616(probes 1544813:1552887)	3.2319e-07	0.0056373		0: t>-0.1; 1: -0.1>t> -1.3; 2: t< -1.3	0	1	0	1	1	0	1	0	1	1	1	0	1	1	0	1	1	1	1	0	1	1	1	1	1	1	0	1	0	0	1	0	1	1	0	0	0	1	0	0	1
Deletion Peak 53	19q13.43	chr19:55771702-55837268(probes 1551181:1551259)	chr19:55784874-55837268(probes 1551185:1551259)	chr19:41383356-58617616(probes 1544813:1552887)	9.6285e-20	1.5425e-17		0: t>-0.1; 1: -0.1>t> -1.3; 2: t< -1.3	0	1	0	1	1	0	1	0	1	1	1	1	1	1	0	1	1	1	1	1	1	1	1	1	1	1	0	1	0	0	0	0	1	1	0	0	1	1	0	0	1
Deletion Peak 54	22q13.32	chr22:42715230-50818468(probes 1629830:1634701)	chr22:48536387-48549197(probes 1634411:1634416)	chr22:42829187-50818468(probes 1629876:1634701)	0.0048726	0.0049145		0: t>-0.1; 1: -0.1>t> -1.3; 2: t< -1.3	1	1	0	0	0	0	0	0	0	0	0	1	0	0	0	0	0	1	0	0	0	0	1	0	0	0	0	0	0	1	0	0	0	0	1	0	0	0	0	0	0
Amplification Peak 1 - CN values	1p36.12	chr1:22356733-23330156(probes 11501:12092)	chr1:23154092-23259231(probes 12000:12060)	chr1:23154092-23277396(probes 12000:12063)	0.20272	0.20272		Actual Copy Change Given	-0.55246	-0.013953	0	-0.73993	0.0076392	0.0064293	-0.73757	0.0072431	-0.83106	-0.87728	-0.87268	0	-0.44943	-0.76792	0.0114	-0.12148	-0.6356	0.033972	-0.39196	0.032422	-0.78507	-0.82594	0.041034	-0.66494	-0.77133	-0.028218	-0.11234	-0.39553	-1.4077e-05	-0.00044055	-0.00068543	-0.005814	-0.85098	-0.84579	0.036951	-0.035721	-0.10263	-0.70734	0.0012481	0.005915	-0.32576
Amplification Peak 2 - CN values	1p31.1	chr1:49431323-111457721(probes 26584:66996)	chr1:74803601-74850803(probes 43468:43488)	chr1:74803601-74860713(probes 43468:43491)	0.23845	0.23845		Actual Copy Change Given	-0.026167	0.031014	0	-0.75452	0.066658	0.004469	-0.77804	0.0072431	-0.8693	-0.87728	-0.90145	0	-0.47205	-0.77677	0.0114	0.012376	-0.68546	0.011679	-0.42276	0.0040243	-0.82122	-0.87775	0.10789	-0.69469	-0.80164	0.0041632	0.0033299	-0.42375	-1.4077e-05	-0.00044055	0.03539	0	-0.89909	-0.87268	-0.16472	0.0029133	0.05466	-0.73547	0.0012481	0.005915	-0.32542
Amplification Peak 3 - CN values	1q22	chr1:156428190-156626306(probes 76163:76274)	chr1:156429152-156476087(probes 76164:76182)	chr1:156094090-156932124(probes 76004:76403)	0.0059835	0.0059835		Actual Copy Change Given	-0.026167	0.012516	0	0.071535	0.0063103	0.11858	0.068235	0.0072431	0.089561	0.085076	0.074552	0	0.011539	0.008892	0.054803	0.04812	0.046275	0.050751	0.017684	0.57683	0.018523	0.070386	0.086666	0.041883	0.065799	0.042449	0.0033299	0.0086135	-1.4077e-05	-0.0024991	1.3408	0	0.078438	0.071104	0.0034687	0.31081	-0.052666	0.054233	0.14382	0.17567	0.0048579
Amplification Peak 4 - CN values	1q32.1	chr1:204340511-204347299(probes 108821:108823)	chr1:204342466-204345090(probes 108822:108822)	chr1:203226562-205263008(probes 108063:109549)	1.3307e-09	1.3307e-09		Actual Copy Change Given	0.029062	-0.004353	0	0.071104	0.0063103	0.11038	0.052241	-0.019568	0.076998	0.0086135	0.0097276	-0.003352	0.011539	0.008892	0.054803	-0.09142	0.0098893	0.028622	0.017684	0.034254	0.018523	0.075271	0.1158	0.047664	0.0069435	-0.048613	-0.27977	0.0086135	-1.4077e-05	-0.0024991	-0.2708	0	0.088113	0.058367	0.0034687	3.6569	-0.042788	0.051672	-0.013815	0.17567	0.0048579
Amplification Peak 5 - CN values	1q42.3	chr1:234852274-234871308(probes 130041:130053)	chr1:234853182-234869762(probes 130042:130052)	chr1:234853182-234872570(probes 130042:130055)	0.036008	0.045731		Actual Copy Change Given	-0.5289	-0.006505	0	0.048972	0.010006	0.10496	0.0077783	-0.019568	0.033972	0.0086135	0.0093007	-0.003352	0.011539	0.008892	0.054803	-0.09142	0.0098893	-0.4421	0.017684	-0.30698	0.018523	0.0091705	0.81903	0.011026	0.0069435	-0.048613	-0.28102	0.0086135	-1.4077e-05	-0.0061883	-0.2708	0	0.014749	0.028341	-0.16781	-0.0044312	0.033831	0.012655	-0.013815	0.17567	0.0048579
Amplification Peak 6 - CN values	1q43	chr1:241903683-245642345(probes 135467:137879)	chr1:243444281-243523610(probes 136376:136449)	chr1:243192160-244467897(probes 136248:137126)	0.12791	0.16646		Actual Copy Change Given	0.040044	-0.006505	0	0.0079175	0.010006	0.10496	0.0077783	-0.019568	0.0079175	0.0086135	0.0093007	0.038884	0.011539	0.008892	0.054803	-0.09142	0.0098893	-0.4292	0.017684	-0.31213	0.018523	0.0091705	0.81903	0.011026	0.0069435	-0.048613	-0.28102	0.0013154	-0.1109	-0.0061883	-0.2708	0	0.014749	-0.0044312	-0.16781	-0.0044312	0.033831	0.012655	-0.05496	0.17567	0.0048579
Amplification Peak 7 - CN values	2p24.3	chr2:15916056-16177446(probes 150279:150390)	chr2:16086759-16177241(probes 150383:150389)	chr2:15746231-16244087(probes 150128:150441)	0.0017189	0.0017189		Actual Copy Change Given	0	0.0090312	0.004719	-0.012438	0.050534	0.038489	-0.0023553	0.0059913	-0.013953	-0.0047079	-0.014366	-0.049181	-0.00013862	-0.0084385	-0.26167	0.080024	0.1792	-0.030131	0.0029133	-0.30639	-0.0017657	0	0.18147	0.0057461	0.0033299	-0.1499	-0.38728	0.0038854	-0.018902	-0.0022621	-0.73292	-0.0031859	-0.019314	-0.0098185	-0.18534	-0.01106	0.043865	0.0026357	0.0041632	0.0031362	0.00069327
Amplification Peak 8 - CN values	2p16.3	chr2:50636136-51136216(probes 173185:173307)	chr2:50636525-51133336(probes 173186:173306)	chr2:50636525-51136260(probes 173186:173309)	0.055553	0.055553		Actual Copy Change Given	0	0.037641	0.004719	-0.012935	0.050534	0.068952	0	0.0059913	-0.0034627	-0.0047079	-0.014366	0.0053861	0.0022193	-0.0084385	-0.26167	0.03031	0.1792	0.0095883	0.0029133	-0.30639	-0.0017657	0	0.95201	0.0072494	0.0033299	-0.1499	-0.26145	0.0038854	-0.018902	-0.0022621	0.01364	-0.0034627	-0.042381	0.0069435	-0.18534	-0.01106	0.066802	0.0026357	0.0041632	0.0031362	0.00069327
Amplification Peak 9 - CN values	2p12	chr2:74925804-75002103(probes 188000:188040)	chr2:74927810-74999662(probes 188001:188039)	chr2:74927810-75005704(probes 188001:188042)	9.1227e-05	9.1227e-05		Actual Copy Change Given	0	-0.0012473	0.004719	0.031577	0.050534	0.051814	0	0.0059913	0.03369	-0.0047079	-0.014366	-0.051073	-0.0026322	-0.0084385	-0.26167	0.03031	0.18737	0.0095883	0.0029133	-0.30404	-0.0017657	0	0.051103	0.0072494	0.0033299	-0.1499	-0.25781	0.0038854	-0.018902	-0.0022621	0.011004	-0.0034627	-0.028081	0.0069435	-0.18534	-0.01106	0.00041593	0.0026357	0.0041632	0.0031362	0.00069327
Amplification Peak 10 - CN values	2q24.2	chr2:159099064-159108039(probes 233083:233094)	chr2:159099247-159108003(probes 233084:233093)	chr2:159099247-159108647(probes 233084:233096)	0.02233	0.02233		Actual Copy Change Given	0	0.017544	-0.035176	-0.072942	0.050534	-0.012713	-0.015879	0.0059913	-0.020412	-0.0047079	-0.014366	-0.034628	-0.0026322	-0.0084385	-0.13406	0.055658	-0.17208	0.0095883	0.0029133	-0.026167	-0.0017657	0	-0.31529	-0.0098185	-0.02384	0.0077783	0	0	-0.018902	-0.0022621	0.040193	-0.0071958	-0.039529	-0.012438	0.012783	-0.01106	0.049256	-0.0096801	0.0041632	-0.0091503	0.00069327
Amplification Peak 11 - CN values	2q24.2	chr2:160339472-160361647(probes 233928:233940)	chr2:160340000-160361023(probes 233929:233939)	chr2:160340000-160363054(probes 233929:233942)	1.2517e-09	1.2517e-09		Actual Copy Change Given	0	0.017544	-0.035176	-0.072942	0.050534	-0.012713	-0.015879	0.0059913	-0.020412	-0.0047079	-0.014366	-0.034628	-0.0026322	-0.0084385	-0.13406	0.055658	-0.17208	0.0095883	0.0029133	-0.026167	-0.0017657	0	-0.31529	-0.0098185	-0.02384	0.0077783	0	0	-0.018902	-0.0022621	0.040193	-0.0071958	-0.039529	-0.012438	0.012783	-0.01106	0.049256	-0.0096801	0.0041632	-0.0091503	0.00069327
Amplification Peak 12 - CN values	2q32.1	chr2:184283698-184309200(probes 248923:248938)	chr2:184286589-184306639(probes 248924:248937)	chr2:184286589-184311539(probes 248924:248940)	0.00036091	0.00036091		Actual Copy Change Given	0	0.017544	-0.045364	-0.0066432	0.050534	-0.022744	-0.015879	0.0059913	-0.020412	-0.0047079	-0.014366	-0.034628	-0.0026322	-0.0084385	-0.13406	0.055658	-0.17208	0.0095883	0.0029133	-0.026167	-0.0017657	0	-0.20498	-0.0098185	-0.02384	0.0077783	0	0	-0.018902	-0.0022621	0.040193	-0.0071958	-0.042788	-0.012438	0.012783	-0.01106	0.064654	-0.0096801	0.0041632	-0.0091503	0.00069327
Amplification Peak 13 - CN values	3p25.3	chr3:1-44783513(probes 283833:311511)	chr3:11406400-11421149(probes 289999:290000)	chr3:11406400-11425353(probes 289999:290003)	0.2458	0.2458		Actual Copy Change Given	0.0078842	0.05132	0.0081959	0.086088	0.01433	0.52643	0.0038854	0.0055742	0.035806	0.0051359	0.0090312	0.022495	0.00027728	0.0075316	0.0029133	0.19056	0.0027745	1.4572	0	-0.30381	0.018663	0.039337	0.20503	0.0038854	0.043582	0.0095883	0.1845	-0.0069195	0.0093098	-0.0010154	0.011129	-0.085192	0.058652	0.035665	0.013353	-0.017254	-0.026167	0.0016642	-0.00068515	0.012461	0.0084743
Amplification Peak 14 - CN values	3q26.33	chr3:178113820-182014388(probes 389236:391510)	chr3:181698498-181709142(probes 391320:391320)	chr3:178119434-182015312(probes 389237:391512)	0.0043952	0.0043952		Actual Copy Change Given	0.0044411	0.046984	-0.0077482	0.47324	0	-0.066386	-0.0076101	0.0055742	-0.0094046	0.0015255	0.00097064	0.02466	0	0.0083351	0.013492	-0.07921	-0.0060904	0.11286	0	0.0041632	-0.0012473	0.00027728	-0.70747	-0.0048461	-0.017391	0.0095883	0.00055459	-0.017116	-0.1281	0.0037011	0.025398	3.6569	0.020063	0	0.013353	-0.017941	0.04954	-0.0011087	0.0048579	-0.062767	0.0072217
Amplification Peak 15 - CN values	4p16.3	chr4:1777070-1815700(probes 401149:401160)	chr4:1777075-1814962(probes 401150:401159)	chr4:1777075-1825245(probes 401150:401167)	0.018734	0.018734		Actual Copy Change Given	0.012097	-0.12408	0.00468	0.050534	-0.007472	-0.0029091	0.026233	0.099165	0.040326	-0.011335	0.00013863	-0.026057	-0.0070576	0.002955	0.0072217	0.10264	-0.022469	-0.70306	-0.015191	0.043299	-0.19099	0.042874	0.1622	0.036794	0.034536	0.0026357	0.0040243	-0.0037395	0.0034687	0.0071763	0.31997	0.040326	0.044574	0.033972	-0.024935	-0.012713	-0.038578	-0.01037	-0.21392	0	-0.0018014
Amplification Peak 16 - CN values	4q12	chr4:52878830-52910638(probes 431760:431773)	chr4:52879758-52907703(probes 431761:431772)	chr4:48067891-61350938(probes 431195:437373)	2.9112e-12	8.3327e-05		Actual Copy Change Given	0.0034687	-0.087712	0.00468	-0.010784	-0.007472	-0.0029091	-0.01849	-0.0021956	-0.018078	-0.011335	0.62624	0.46413	-0.0070576	0.012097	-0.010438	0.024268	-0.022469	-0.018353	-0.015191	-0.0038779	-0.22552	-0.0084385	0.1022	-0.015985	-0.031632	0.0026357	0.0040243	-0.0037395	0.0034687	0.0071763	0.030177	0.040326	-0.016841	-0.0071958	0.014051	-0.0026206	0.021884	-0.065581	-0.0077482	0	0.20817
Amplification Peak 17 - CN values	4q12	chr4:54138220-54176172(probes 432585:432600)	chr4:54142148-54172521(probes 432586:432599)	chr4:48067891-61350938(probes 431195:437373)	1.1839e-28	1.4329e-25		Actual Copy Change Given	0.0034687	-0.13109	0.00468	-0.010784	-0.007472	-0.0029091	-0.01849	-0.0021956	-0.018078	-0.011335	-0.01849	0.46413	-0.0070576	0.012097	-0.010438	0.024268	-0.022469	-0.018353	-0.015191	-0.0038779	-0.22552	-0.0084385	1.017	-0.015985	-0.031632	0.0026357	0.0040243	-0.0037395	0.0034687	0.0071763	0.030177	0.54013	-0.016841	-0.0071958	0.014051	-0.0026206	0.021884	-0.065581	-0.0077482	0	0.62388
Amplification Peak 18 - CN values	4q28.1	chr4:124720152-124724948(probes 475569:475584)	chr4:124720174-124724813(probes 475570:475583)	chr4:124720174-124725028(probes 475570:475586)	2.8116e-08	2.8116e-08		Actual Copy Change Given	3.6569	-0.26905	-0.0096368	-0.010784	-0.007472	-0.084005	-0.01849	-0.0021956	-0.048613	-0.015406	-0.74725	-0.32137	-0.0070576	-0.77575	-0.010438	0.025671	-0.022469	-0.13199	-0.015191	-0.0069195	-0.24195	-0.0084385	-1.0234	-0.036985	-0.031632	0.02806	-0.25189	-0.012302	0.0034687	0.005833	-0.65042	0.043623	-0.047531	-0.0071958	-0.13057	0.003191	0.092025	-0.065581	-0.03245	0	-0.25019
Amplification Peak 19 - CN values	5p15.33	chr5:1287426-1308958(probes 512200:512208)	chr5:1287589-1308436(probes 512201:512207)	chr5:1287589-1313551(probes 512201:512210)	0.14558	0.14558		Actual Copy Change Given	0.0040243	-0.13251	-0.074411	0.088258	-0.4055	-0.018078	0.045566	-0.0057462	0.051103	-0.0019399	0	-0.059296	-0.0022168	-0.023566	-0.0030475	-0.032314	0	-0.073076	-0.0075343	0.0079175	0	-0.0092666	0.017544	0.0037465	0.029466	-0.80584	-0.063838	0.025671	0.0055529	9.2497e-05	-0.16255	0.03637	0.0024969	-0.010184	0.21991	0.36953	-0.89151	0	-0.0023553	-0.65532	0.0027745
Amplification Peak 20 - CN values	6p21.31	chr6:35690565-37949576(probes 643252:644712)	chr6:35691118-36369658(probes 643253:643667)	chr6:35691118-37957129(probes 643253:644714)	0.067348	0.13217		Actual Copy Change Given	0.0058309	-0.010727	0.0030123	0.1057	-0.058731	0.017404	0.057796	-0.0016416	0.062794	0.041175	0.039761	-0.014806	0.02806	0.015308	0.006109	0.24918	0.062508	0.001803	0.035947	0.037924	0.054803	0.086811	0.054527	0.051387	0.064215	-0.13355	0.00016464	0.0095883	0.0071496	-0.0005997	-0.010501	-0.015191	0.11448	0.06537	0.011539	-0.042517	-0.025893	0.050534	-0.0063668	-0.045011	0.0090312
Amplification Peak 21 - CN values	6p21.2	chr6:38771159-39770036(probes 645286:646016)	chr6:38774933-38855128(probes 645287:645346)	chr6:38774933-39771396(probes 645287:646018)	0.051148	0.10677		Actual Copy Change Given	0.0058309	-0.010727	0.0030123	0.019363	0.041175	0.017404	0.057796	-0.0016416	0.0098669	0.041175	0.039761	-0.014806	0.02806	0.015308	0.006109	0.24918	0.062508	0.001803	0.035947	0.037924	0.054803	0.019083	0.054527	0.051387	0.064215	-0.13355	0.00016464	0.0095883	0.0071496	-0.0005997	-0.010501	0.047126	0.048262	0.012097	0.011539	-0.042517	-0.025893	0.050534	-0.0063668	-0.045011	0.0090312
Amplification Peak 22 - CN values	6p21.1	chr6:41714528-41744713(probes 647542:647562)	chr6:41714544-41743583(probes 647543:647561)	chr6:41714544-41749966(probes 647543:647564)	0.11647	0.22453		Actual Copy Change Given	0.0058309	-0.010727	0.0030123	0.098415	-0.049424	0.017544	0.057796	-0.0016416	0.077718	0.041175	0.039761	-0.014806	0.02806	0.015308	0.006109	0.10468	0.06208	0.001803	0.035947	0.037924	0.054803	0.068808	0.054527	0.051387	0.064215	-0.13355	0.00016464	0.0095883	0.0071496	-0.0005997	-0.010501	0.047126	0.048262	0.07053	0.011539	-0.042517	-0.025893	0.050534	-0.0063668	-0.028955	0.0090312
Amplification Peak 23 - CN values	6p21.1	chr6:41870042-42013132(probes 647613:647692)	chr6:41874062-42012693(probes 647614:647691)	chr6:41874062-42015268(probes 647614:647694)	0.11647	0.22453		Actual Copy Change Given	0.0058309	-0.010727	0.0030123	0.098415	-0.049424	0.017544	0.057796	-0.0016416	0.077718	0.041175	0.039761	-0.014806	0.02806	0.015308	0.006109	0.10468	0.06208	0.001803	0.035947	0.037924	0.054803	0.068808	0.054527	0.051387	0.064215	-0.13355	0.00016464	0.0095883	0.0071496	-0.0005997	-0.010501	0.047126	0.11067	0.07053	0.011539	-0.042517	-0.025893	0.050534	-0.0063668	-0.028955	0.0090312
Amplification Peak 24 - CN values	6p21.1	chr6:42736382-42796758(probes 648111:648141)	chr6:42791113-42796458(probes 648138:648140)	chr6:42739893-42802412(probes 648112:648143)	0.12329	0.2126		Actual Copy Change Given	0.0058309	-0.010727	0.0030123	0.098415	-0.049424	0.017544	0.057796	-0.0016416	0.077718	0.041175	0.039761	-0.014806	0.02806	0.015308	0.006109	0.042024	0.06208	0.001803	0.035947	0.037924	0.054803	0.068808	0.074984	0.051387	0.064215	-0.0087146	0.00016464	0.0095883	0.0071496	-0.0005997	-0.010501	0.047126	0.11067	0.07053	0.011539	-0.042517	-0.025893	0.050534	-0.0063668	-0.028955	0.0090312
Amplification Peak 25 - CN values	6q21	chr6:106791533-107057044(probes 685445:685528)	chr6:106793181-107051837(probes 685446:685527)	chr6:106793181-107059528(probes 685446:685530)	0.023306	0.023306		Actual Copy Change Given	0.0058309	-0.0094046	0.013492	-0.0015243	0.054945	-0.012843	-0.0051227	-0.0016416	-0.0084385	-0.0022168	0.0034687	0.022136	-0.0014389	0.015308	0.006109	-0.62066	0.012097	-0.094856	0.0087528	0	-0.0019399	-0.0083005	0.22037	0.029325	-0.022527	-0.0087146	0.0038854	0.0016779	0.0071496	-0.0005997	0.030318	0.058081	0.032422	-0.0042929	0.011539	0.0036076	-0.39753	0.033267	-0.0065914	-0.010976	0.0090312
Amplification Peak 26 - CN values	7p12.2	chr7:48975035-52994172(probes 756590:759593)	chr7:50440893-50498391(probes 757582:757633)	chr7:48975719-52999796(probes 756591:759595)	0.013217	0.067348		Actual Copy Change Given	0.52485	0.013353	-0.0013858	0.0084743	0.034254	-0.050235	0.00458	0.0046013	0.0052749	-0.0024938	0.0011093	-0.046339	0.0029133	0.0033299	-0.0068776	-0.021647	0.027497	-0.019589	-0.0081624	0.011261	0.018523	-0.00055444	0.17302	-0.0023553	0.82568	0	-0.0066432	0.00041593	-0.13458	0	0.006812	0.77964	-0.0033243	0.0023581	-0.16815	0.9013	0.016845	0.0058309	-0.056038	0.0070277	0.0030763
Amplification Peak 27 - CN values	7p11.2	chr7:54876881-55037263(probes 760851:760971)	chr7:54876971-55014481(probes 760852:760938)	chr7:53737871-63677724(probes 760059:761972)	3.4188e-42	2.9116e-41		Actual Copy Change Given	0.50047	0.065083	-0.0013858	0.0084743	0.034254	-0.050235	0.00458	0.0046013	0.0052749	-0.0024938	0.0011093	0.025222	0.0029133	0.0033299	-0.0068776	0.039902	0.027497	0.066086	-0.0081624	-0.017116	0.017326	0.030873	0.17302	-0.0023553	0.82568	0	-0.0066432	0.00041593	-0.13458	0	0.006812	0.77964	-0.0033243	0.0023581	-0.16815	3.6569	0.052014	0.0058309	-0.056038	0.0070277	0.0030763
Amplification Peak 28 - CN values	7p11.2	chr7:56356124-56535784(probes 761812:761868)	chr7:56357047-56535438(probes 761813:761867)	chr7:53737871-63677724(probes 760059:761972)	3.2791e-06	0.13217		Actual Copy Change Given	0.50047	0.0075	-0.0013858	0.0084743	0.034254	-0.050235	0.00458	0.0046013	0.0052749	-0.0024938	0.0011093	0.025222	0.0029133	0.0033299	-0.0068776	0.039902	0.027497	-0.015879	-0.0081624	-0.017116	0.017326	0.030873	0.069382	-0.0023553	0.82568	0	-0.0066432	0.00041593	-0.13458	0	-0.051174	0.6898	0.045282	0.0023581	-0.16815	0.77445	-0.029448	0.0058309	-0.056038	0.0070277	0.0030763
Amplification Peak 29 - CN values	7q21.2	chr7:92245373-92901034(probes 777092:777623)	chr7:92551065-92665128(probes 777232:777343)	chr7:92127066-93652404(probes 777047:778029)	0.0033175	0.0041639		Actual Copy Change Given	0.50047	0.40766	0.023005	-0.0094046	0.032563	0	-0.023018	0.0046013	-0.0053992	-0.0024938	0.0011093	0.04412	0.0029133	0.0033299	0.0063871	0.053948	0.027497	0.066229	-0.0081624	-0.030797	0.017326	-0.014916	0.11624	-0.0023553	0.82568	0.040326	0.016146	0.00041593	0.0051359	0	0.035108	0.81825	-0.034223	0.0023581	-0.16815	0.87249	0.086956	0.0058309	0.63591	0.0070277	0.0052749
Amplification Peak 30 - CN values	7q32.3	chr7:130248495-132731700(probes 798920:800590)	chr7:130883698-131032963(probes 799212:799322)	chr7:129968187-132732644(probes 798804:800592)	0.0049897	0.04195		Actual Copy Change Given	0.50047	0.40644	0.023005	0.026514	0.0282	0.006109	0.011261	0.0046013	0.03106	-0.0024938	0.0011093	0.46174	0.0029133	0.0033299	0.79336	0.38949	0.027497	0.22638	-0.0081624	-0.030797	0.017326	0.016565	0.071248	-0.0044312	0.82568	0.025671	0.016146	0.00041593	0.0051359	0.00384	0.034544	0.80636	0.014888	0.0023581	-0.17046	2.3651	-0.0019399	0.0058309	0.63591	0.083574	0.0052749
Amplification Peak 31 - CN values	7q34	chr7:142554532-142768622(probes 806952:806964)	chr7:142554631-142581255(probes 806953:806963)	chr7:142544397-142810691(probes 806951:806966)	2.2495e-05	6.4355e-05		Actual Copy Change Given	0.50047	0.40644	0.023005	0.026514	0.0282	0.006109	0.011261	0.0046013	0.03106	0.018943	0.0011093	0.46174	0.0029133	3.6569	0.79336	0.38949	0.027497	0.22638	-0.0081624	-0.029857	0.017326	0.016565	0.07053	-0.0044312	0.82568	0.025671	0.016146	0.00041593	0.0051359	0.00384	0.019665	0.82099	0.014888	0.0023581	-0.17046	0.86652	0.048262	0.0058309	0.63591	0.083574	0.0052749
Amplification Peak 32 - CN values	8q24.21	chr8:121868709-132153675(probes 891570:898842)	chr8:129390327-129441879(probes 896870:896902)	chr8:104937662-145138636(probes 880969:906457)	1.5782e-06	1.5782e-06		Actual Copy Change Given	-0.0011087	0.37874	0.10818	0.074696	-0.29886	0.57969	0.0098669	0.074718	0.049114	0.00055459	-0.0071958	0.017703	-0.0011087	-0.0018014	0.048262	0.035665	-0.066252	0.56312	0.010982	0.031014	0.011539	-0.01037	2.2815	-0.0029091	0.017684	0.0081959	0.71049	-0.0031859	0.0076392	0.0095429	0.77253	0.020343	-0.013402	-0.0084385	0.0051028	0.001803	1.9258	0.01433	-0.0018014	0.067318	-0.0016629
Amplification Peak 33 - CN values	9p24.1	chr9:7997400-8024196(probes 911901:911915)	chr9:8000287-8021064(probes 911902:911914)	chr9:8000287-8025032(probes 911902:911917)	0.151	0.151		Actual Copy Change Given	0.017124	-0.48165	-0.052531	-0.18999	0.037924	-0.36318	-0.0042929	-0.000256	-0.0020784	0.010982	-0.74194	-0.11014	0.0044411	0.00027728	0.00097064	-0.28037	-0.59618	-0.38369	0.015552	0.0062481	0.003191	0.012428	-0.83486	-0.0023553	-0.011577	-0.057385	0.23117	-0.00013862	-0.0036011	-0.0076552	-0.0089831	0.026233	-0.029721	0.0068044	-0.78245	0.027216	0.00027728	0	-0.11339	0.58338	9.7085e-05
Amplification Peak 34 - CN values	9p13.3	chr9:34794594-36967961(probes 929971:931235)	chr9:35551637-35627492(probes 930355:930384)	chr9:35536850-35933325(probes 930347:930535)	0.11647	0.11647		Actual Copy Change Given	0.0094491	0.0043021	0.021744	-0.11615	0.033127	-0.076012	0.012655	-0.000256	0.057083	0.010982	-0.72225	-0.0045972	0.0044411	0.00027728	-0.0040575	0.035524	-0.59618	-0.48712	0.015552	0.0062481	0.06308	0.012428	-0.83623	-0.0023553	0.0080567	-0.067592	0.23783	-0.00013862	-0.0036011	0.002868	-0.0089831	0.010982	0.050819	0.0068044	0.010944	-0.012438	-0.062361	0.053379	-0.11339	0.58338	9.7085e-05
Amplification Peak 35 - CN values	9q34.3	chr9:122982779-138394717(probes 971980:980379)	chr9:137563957-137839736(probes 980168:980300)	chr9:137414622-138394717(probes 980126:980379)	0.096444	0.096444		Actual Copy Change Given	0.0094491	0.062937	-0.036946	-0.14374	-0.03681	0.47032	0.086956	-0.000256	0.041458	0.069525	-0.6857	-0.012918	0.047978	0.00027728	-0.66448	0.026935	0.07743	-0.0066432	0.057796	-0.0019399	0.094491	0.089561	-0.16672	0.072827	0.040609	-0.030813	0.01447	0.045849	-0.0036011	-0.0087597	-0.0089831	-0.051991	0.058488	0.075847	0.019783	-0.093403	-0.11234	0.076998	0.26985	0.0031362	0.0049969
Amplification Peak 36 - CN values	10p15.3	chr10:1-1429569(probes 980380:980914)	chr10:985048-1006307(probes 980741:980754)	chr10:1-6406807(probes 980380:984886)	0.0006451	0.0006451		Actual Copy Change Given	-0.57219	0.0077783	0.27821	0.014051	-0.38605	0.95283	0.020203	0.51999	0.02806	0.003191	0.0038854	0.19403	0.004719	0	-0.0045695	1.1357	0.014609	-0.00041585	-0.0025468	0.60052	0.014609	0.022024	0.81201	0.021744	0.04883	-0.0054775	0.23488	-0.0034627	0	0.1899	0.36494	-0.67322	0.022865	0.022164	0.00097064	-0.91507	0.0011093	0.010564	0.0029133	-0.0014405	-0.00041585
Amplification Peak 37 - CN values	11q21	chr11:96069560-96214119(probes 1124139:1124265)	chr11:96084036-96205346(probes 1124145:1124263)	chr11:96084036-96214338(probes 1124145:1124266)	0.1768	0.18092		Actual Copy Change Given	-0.005814	0.0416	0.05549	0.11653	-0.25998	0.8048	-0.0059522	0.017565	-0.011335	0	-0.0063668	0.15484	0.0025888	0.56365	0.0036976	0.040044	0.66678	0.21238	0.019643	-0.024033	-0.0064488	-0.00041585	1.3086	-0.0020784	-0.02384	0.016006	0.65075	0.0021273	0.0072217	0.0041178	0.010293	-0.10132	0.63865	0.74937	0.006055	-0.43268	0.47547	-0.0053992	0.10468	0.21447	0
Amplification Peak 38 - CN values	11q24.1	chr11:117988132-128672305(probes 1139257:1147243)	chr11:121408316-121518623(probes 1141671:1141733)	chr11:116834853-135086622(probes 1138502:1150958)	4.2849e-05	0.0050841		Actual Copy Change Given	-0.005814	0.012097	0.099579	0.12727	-0.25998	0.77868	0.0075	0.043462	0.014888	0.0062481	-0.0084385	0.15484	0.0068044	-0.0070576	0.024127	-0.0060904	0.0076392	0.11712	-0.034359	-0.00069303	0.020483	0.048404	0.33901	0.046133	0.019363	-0.072007	0.65792	0.0041632	0.058652	0.0041178	0.010293	-0.10132	0.70645	0.79026	0.027778	-0.43268	0.42452	0.025952	0.11829	0.21186	0
Amplification Peak 39 - CN values	11q25	chr11:131106864-131117834(probes 1148753:1148775)	chr11:131107513-131117639(probes 1148754:1148774)	chr11:116834853-135086622(probes 1138502:1150958)	1.2126e-05	0.0008435		Actual Copy Change Given	0.0056919	0.012097	0.099579	0.12727	-0.25998	1.0111	0.0075	-0.0016416	0.014888	0.0062481	-0.0084385	0.15484	0.0068044	-0.022812	0.024127	-0.0060904	0.0076392	0.11459	-0.034359	-0.00069303	-0.011335	0.0030522	0.3415	0.00055459	-0.0010316	-0.072007	0.32237	0.0041632	0.058652	0.0041178	0.010293	-0.10132	0.70645	0.79026	0.027778	-0.43268	0.42452	0.00097064	0.11829	0.21186	0
Amplification Peak 40 - CN values	12p13.33	chr12:2341300-2395869(probes 1151626:1151679)	chr12:2343923-2393715(probes 1151628:1151678)	chr12:1-11702355(probes 1150959:1157430)	4.6601e-10	0.00012249		Actual Copy Change Given	-0.0041546	0.025952	0.17272	0.044432	0.010842	0.17257	0.04259	0.032707	0.03637	0.0072217	0.11228	0.0071939	0.0033299	0.0090843	-0.012162	0.045566	-0.012576	0.0095883	-0.0062286	0.64213	0.035524	0.033549	1.6563	0.038065	0.036088	0.012376	0.24373	0.0038854	0.008892	0.0043957	1.4132	0.013213	0.061508	0.035665	0.006109	0	-0.0067813	0.027638	-0.020138	0.0086978	-0.00013862
Amplification Peak 41 - CN values	12p13.32	chr12:3912358-3955080(probes 1152701:1152736)	chr12:3914145-3954989(probes 1152702:1152735)	chr12:1-11702355(probes 1150959:1157430)	3.4642e-13	2.6389e-09		Actual Copy Change Given	-0.0041546	1.339	0.17272	0.044432	0.010842	0.17257	0.04259	0.032707	0.03637	0.0072217	0.11228	0.0071939	0.0033299	0.0090843	-0.012162	0.045566	-0.012576	0.0095883	-0.0062286	0.64213	0.035524	0.033549	1.6563	0.038065	0.036088	0.012376	0.24373	0.0038854	0.008892	0.0043957	1.4132	0.013213	0.061508	0.035665	0.006109	0	-0.0067813	0.027638	-0.020138	0.0086978	-0.00013862
Amplification Peak 42 - CN values	12p12.1	chr12:21539025-21557219(probes 1163813:1163828)	chr12:21539182-21556684(probes 1163814:1163827)	chr12:21306943-25654485(probes 1163652:1166572)	0.0025124	0.0025124		Actual Copy Change Given	-0.0041546	0.093475	0.046133	-0.0016629	0.010842	0.097542	-0.017995	-0.00081037	-0.0071958	0.0072217	-0.00041585	0.0071939	0.0033299	0.0090843	-0.012162	-0.63595	-0.012576	0.0095883	-0.028491	-0.0087146	-0.0037395	-0.0008316	0.88732	0	-0.014228	0.012376	0.011539	0.0038854	0.008892	0.0043957	0.027364	0.013213	-0.0040162	-0.0056757	0.006109	0	0.067375	-0.012868	-0.020138	0.0086978	-0.00013862
Amplification Peak 43 - CN values	12q13.12	chr12:50388331-50715346(probes 1178396:1178534)	chr12:50388994-50456156(probes 1178397:1178417)	chr12:50388994-50725656(probes 1178397:1178539)	0.0065134	0.0065134		Actual Copy Change Given	-0.0041546	-0.06048	-0.0040162	0.060794	-0.038714	0.0079175	0.055515	-0.00081037	0.062223	0.0072217	0.034818	0.012348	0.0033299	0.0019418	-0.012162	-0.27021	0.026935	0.0095883	-0.076145	-0.0087146	0.044857	0.070817	-0.039258	0.056655	0.046417	-0.37414	-0.23141	0.0038854	-0.15733	-0.040357	-0.050228	0.013213	0.063652	0.054091	0.006109	-0.055769	-0.28263	0.040185	-0.020138	-0.15827	-0.00013862
Amplification Peak 44 - CN values	12q14.1	chr12:57731613-57762726(probes 1182368:1182383)	chr12:57731656-57762597(probes 1182369:1182382)	chr12:57174359-59337876(probes 1182143:1183515)	7.1822e-57	1.0811e-55		Actual Copy Change Given	-0.0041546	-0.06048	-0.0040162	0.060794	-0.038714	0.0079175	0.055515	-0.00081037	0.062223	0.0072217	-0.0045695	0.012348	0.0033299	0.0019418	-0.012162	3.0929	-0.0083005	0.0095883	-0.076145	-0.0087146	0.044857	-0.0053992	-0.33341	0.056655	0.046417	-0.37414	-0.24257	0.0013868	-0.15631	-0.028946	-0.014358	3.6569	0.063652	-0.0089906	0.006109	3.6569	-0.28263	0.040185	-0.020138	-0.15827	-0.00013862
Amplification Peak 45 - CN values	12q14.1	chr12:58455940-58479055(probes 1182866:1182880)	chr12:58456464-58478774(probes 1182867:1182879)	chr12:57174359-59337876(probes 1182143:1183515)	5.0211e-08	0.0025324		Actual Copy Change Given	-0.0041546	-0.06048	-0.0040162	0.00069327	0.0027745	0.0079175	-0.0087691	-0.00081037	-0.0036011	0.0072217	-0.0045695	0.012348	0.0033299	0.0019418	-0.012162	-0.2843	-0.0083005	0.0095883	-0.076145	-0.0087146	-0.01037	-0.0053992	-0.26709	-0.007698	-0.015329	-0.37414	-0.24257	0.0013868	-0.15631	-0.028946	-0.014358	0.036913	-0.033131	-0.0089906	0.006109	-0.0063668	-0.20747	-0.0069195	-0.020138	-0.15827	-0.00013862
Amplification Peak 46 - CN values	12q14.3	chr12:64697535-64945573(probes 1186697:1186843)	chr12:64697635-64755025(probes 1186698:1186727)	chr12:64697635-64946907(probes 1186698:1186845)	0.11965	0.16646		Actual Copy Change Given	-0.0041546	-0.056173	-0.0040162	0.00069327	0.0027745	-0.055364	-0.0087691	-0.00081037	-0.0036011	0.0072217	-0.0045695	0.012348	0.0033299	0.0019418	-0.012162	-0.2843	-0.0083005	0.0095883	-0.076145	-0.0087146	-0.01037	-0.0053992	-0.79294	-0.007698	-0.015329	-0.37414	-0.24257	0.0013868	-0.15631	-0.028946	-0.014358	-0.032587	-0.0033243	-0.0089906	0.006109	-0.0063668	-0.20747	-0.0069195	-0.020138	-0.15827	-0.00013862
Amplification Peak 47 - CN values	12q15	chr12:68764829-68866975(probes 1189479:1189566)	chr12:68768722-68866647(probes 1189482:1189565)	chr12:68644391-69552573(probes 1189421:1190014)	0.00015865	0.00085953		Actual Copy Change Given	-0.0041546	-0.056173	-0.0040162	0.00069327	0.0027745	-0.055364	-0.0087691	-0.00081037	-0.0036011	0.0072217	-0.0045695	0.012348	0.0033299	0.0019418	-0.012162	-0.2843	-0.0083005	0.0070826	-0.076145	-0.0087146	-0.01037	-0.0053992	-0.79294	-0.007698	-0.015329	-0.37414	-0.24257	0.0013868	-0.15631	-0.03711	-0.014358	-0.032587	-0.0033243	-0.0089906	0.006109	-0.0063668	-0.20747	-0.0069195	-0.020138	-0.15827	-0.00013862
Amplification Peak 48 - CN values	12q15	chr12:69769597-69787646(probes 1190190:1190196)	chr12:69773385-69787575(probes 1190191:1190195)	chr12:69713867-69866039(probes 1190164:1190232)	0.0014658	0.017266		Actual Copy Change Given	-0.0041546	-0.056173	-0.0040162	0.00069327	0.0027745	-0.00027724	-0.0087691	-0.00081037	-0.0036011	0.0072217	-0.0045695	0.012348	0.0033299	0.0019418	-0.012162	-0.2843	-0.0083005	0.0070826	-0.076145	-0.0087146	-0.01037	-0.0053992	-0.74516	-0.0011087	-0.015329	-0.37414	-0.24257	0.0013868	-0.15631	-0.03711	-0.014358	-0.032587	-0.0033243	-0.0089906	0.006109	-0.0063668	-0.17297	-0.0069195	-0.020138	-0.15827	-0.00013862
Amplification Peak 49 - CN values	12q21.1	chr12:71630601-71654761(probes 1191384:1191391)	chr12:71630942-71654578(probes 1191385:1191390)	chr12:71591762-71883721(probes 1191353:1191507)	0.0068011	0.013788		Actual Copy Change Given	-0.0041546	-0.056173	-0.0040162	0.00069327	0.0027745	-0.00027724	-0.0087691	-0.00081037	-0.0036011	0.0072217	-0.0045695	0.012348	0.0033299	0.0019418	-0.012162	-0.2843	-0.0083005	0.0070826	-0.076145	-0.0087146	-0.01037	-0.0053992	-0.74516	-0.0011087	-0.015329	-0.37414	-0.24257	0.0013868	-0.15631	-0.03711	-0.014358	-0.032587	-0.040888	-0.0089906	0.006109	-0.0063668	-0.17297	-0.0069195	-0.020138	-0.15827	-0.00013862
Amplification Peak 50 - CN values	12q24.21	chr12:114685071-114768559(probes 1218908:1218963)	chr12:114685214-114766181(probes 1218909:1218962)	chr12:114685214-114780716(probes 1218909:1218965)	0.05782	0.151		Actual Copy Change Given	-0.0041546	0.036262	-0.0040162	0.0467	0.0027745	-0.028355	0.039195	-0.00081037	0.034677	0.0072217	-0.0045695	-0.027562	0.0033299	0.0019418	-0.012162	-0.2843	-0.0083005	-0.00027724	-0.076145	-0.30463	0.030591	0.023847	-1.0684	0.04259	0.034113	-0.37414	-0.24156	0.01419	0.18102	-0.48862	-0.057916	-0.0034627	0.053806	0.039902	0.0035629	-0.0063668	-0.28144	0.031155	-0.020138	-0.15827	-0.00013862
Amplification Peak 51 - CN values	12q24.31	chr12:123723022-123831543(probes 1224454:1224495)	chr12:123771352-123825984(probes 1224478:1224494)	chr12:123625823-123832367(probes 1224450:1224497)	0.0035993	0.013788		Actual Copy Change Given	-0.0041546	0.037217	-0.0040162	0.10526	-0.059942	0.020623	0.081322	-0.00081037	0.10278	0.059651	0.062651	-0.027562	0.0033299	0.0019418	-0.012162	-0.2843	0.048688	-0.00027724	-0.076145	-0.3105	0.084065	0.087824	-0.33121	0.04259	0.1095	-0.37414	-0.24156	0.01419	0.0024969	-0.76255	-0.057916	-0.0034627	0.057226	0.046559	-0.005814	0.0023581	-0.28144	0.031155	-0.020138	-0.32058	-0.00013862
Amplification Peak 52 - CN values	12q24.33	chr12:128905470-129044361(probes 1227991:1228119)	chr12:128936744-129044041(probes 1228015:1228118)	chr12:128905470-129045821(probes 1227991:1228121)	0.0051698	0.019565		Actual Copy Change Given	-0.0041546	0.037217	-0.0040162	0.015168	0.0091967	-0.071739	0.012516	-0.062206	0.003191	-0.0055375	-0.00041585	-0.027562	0.0033299	0.0019418	-0.012162	-0.36861	-0.015604	-0.12668	-0.086754	-0.3105	0.0077783	-0.0040162	-0.33121	0.021951	0.021323	-0.37414	-0.24156	0.01419	0.30665	-0.76255	-0.057916	-0.0034627	-0.012851	-0.011887	-0.005814	0.0023581	-0.28144	0.031155	-0.020138	-0.32058	-0.00013862
Amplification Peak 53 - CN values	13q34	chr13:107961957-110429710(probes 1287271:1289277)	chr13:109636621-109716929(probes 1288618:1288686)	chr13:106348575-110955783(probes 1285979:1289674)	0.00028549	0.00028549		Actual Copy Change Given	-0.020412	-0.41915	-0.078144	0.030591	-0.20672	-0.014916	-0.019784	0.01491	0.013772	-0.89505	-0.007472	0.016677	-0.11299	-0.014778	0.0081959	-0.15503	-0.006505	-0.00041585	-0.022881	-0.0040162	-0.0041546	-0.00041585	0.15651	-0.013271	-0.010922	0.015028	-0.25151	-0.0041546	-0.015329	0.71879	-0.34216	-0.64407	0.010564	0.0098669	-0.1351	0.77156	-0.86326	-0.066403	-0.015329	-0.0054538	-0.26729
Amplification Peak 54 - CN values	14q32.2	chr14:97686705-97694334(probes 1340349:1340361)	chr14:97686718-97690507(probes 1340350:1340360)	chr14:97686718-97694865(probes 1340350:1340363)	0.17146	0.17146		Actual Copy Change Given	-0.00055444	-0.18697	-0.0016629	-0.19337	-0.80177	-0.024524	0.043865	0.0043234	0.055515	0.018103	-0.73354	-0.025784	0.016565	-0.77778	0.0062481	-0.65901	0.015447	-0.23129	0.0055529	-0.62631	0.030451	0.050677	0.11902	0.033408	0.04259	-0.14534	-0.06142	0.0065262	0.00013863	0.0013415	-0.0067737	0.0024969	0.068665	-0.87256	-0.29804	-0.14965	0.75127	0.032563	-0.0018014	0.0029973	0.0016642
Amplification Peak 55 - CN values	15q26.3	chr15:98164092-100208002(probes 1390573:1392008)	chr15:98867884-99148671(probes 1391097:1391322)	chr15:98333396-99248260(probes 1390701:1391388)	0.034568	0.034568		Actual Copy Change Given	-0.00097017	0.1076	-0.011882	0.0095883	-0.24703	-0.011335	0.011121	-0.001226	0.015028	0.022725	0.027357	-0.035203	0.016146	-0.023155	0.00081945	0.22191	0.00097064	0.2153	0.019783	-0.275	-0.42057	0.028205	0.5142	0.025671	0.0095883	-0.15771	-0.041702	0.010371	0.00069327	-0.0094497	0.0036152	0.010006	-0.87182	0.027778	-0.37865	0.012097	0.0080567	0.010982	-0.00041585	-0.0058686	-0.00055444
Amplification Peak 56 - CN values	16p13.2	chr16:8821049-9134674(probes 1397729:1397917)	chr16:8831870-9132512(probes 1397730:1397916)	chr16:8831870-9142441(probes 1397730:1397919)	0.009082	0.009082		Actual Copy Change Given	-0.0016629	-0.0070576	-0.007472	0.024268	0.088548	-0.0094046	0.05523	-0.0038567	0.058795	0.014621	0.018103	-0.024141	0.016286	-0.0073339	-0.0068945	0.045991	0.026233	-0.0029091	0.023145	0.018103	0.035208	0.043015	-0.37358	0.03637	0.063939	-0.013677	-0.0083005	0.013632	-0.012024	0.010797	-0.042781	0.067805	0.10789	0.058224	0.1676	0.0027745	-0.061017	0.0063871	0.030732	0.00522	-0.0038779
Amplification Peak 57 - CN values	17q23.2	chr17:62969370-63016546(probes 1468501:1468516)	chr17:62969904-63015391(probes 1468502:1468515)	chr17:62969904-63019812(probes 1468502:1468518)	0.007639	0.032107		Actual Copy Change Given	-0.0096806	0.40944	0.048972	0.079591	0.019923	0.81337	0.056655	-0.0010875	0.061058	0.033831	0.026373	0.016258	0.029747	0.010703	-0.075345	-0.1092	0.020903	0.024689	0.051387	0.013911	0.038913	0.063223	-0.20249	0.060263	0.029606	-0.0071958	0.027919	0.025531	0.00041593	0.0046736	-0.058589	0.0015255	0.0871	0.87488	0.18453	-0.027124	-0.038986	0.021477	0.00013863	0.001332	-0.00069303
Amplification Peak 58 - CN values	17q25.1	chr17:59577305-83257441(probes 1466863:1480108)	chr17:76579533-76602874(probes 1477094:1477114)	chr17:75237207-76739259(probes 1476518:1477192)	0.045731	0.23243		Actual Copy Change Given	-0.049965	0.37019	0.048972	0.14162	0.28881	0.81337	0.095798	-0.0010875	0.13613	0.091155	0.084065	0.016258	0.029747	0.0086135	-0.075345	-0.1092	0.071822	0.024689	0.09246	0.67771	0.083296	0.11272	0.052668	0.10293	0.091445	-0.0071958	0.027919	0.025531	0.00041593	0.0046736	-0.058589	-0.03681	0.11096	0.96596	0.18453	-0.083067	-0.078943	0.088837	0.00013863	0.001332	-0.00069303
Amplification Peak 59 - CN values	19p13.3	chr19:713557-807591(probes 1526500:1526511)	chr19:715431-804395(probes 1526501:1526510)	chr19:1-1228277(probes 1526377:1526605)	9.1227e-05	9.1227e-05		Actual Copy Change Given	0.41479	-0.020316	-0.09261	0.13376	-0.13329	0.0058309	0.11624	-0.00067179	0.13214	0.073833	0.075271	-0.016732	0.05466	0.029325	-0.013953	-0.12538	0.072827	0.022164	0.067518	0.031718	0.099433	0.12314	-0.16701	0.11272	0.098706	-0.021784	0.044007	0.0467	-0.0012473	0.0058707	-0.059934	0.5252	0.12904	0.11961	-0.023703	0.67586	-0.11182	0.099288	-0.012162	-0.00088633	0.00041593
Deletion Peak 1 - CN values	1p36.32	chr1:4424273-5565505(probes 731:1716)	chr1:4648928-4780902(probes 959:1082)	chr1:1-12567449(probes 1:5659)	0.00026486	0.087069		Actual Copy Change Given	-0.0028648	-0.013953	0	-0.78015	0.0076392	0.0064293	-0.81046	-0.01517	-0.8984	-0.87728	-0.915	0	-0.47056	-0.76792	0.0114	-0.12148	-0.68942	0.033972	-0.39196	-0.31762	-0.82179	-0.87604	-0.059	-0.7089	-0.77133	-0.028218	-0.11234	-0.41289	-1.4077e-05	0.0042568	-0.00068543	-0.005814	-0.91266	-0.90335	-0.17651	-0.011887	-0.10263	-0.74742	0.0012481	0.005915	-0.32576
Deletion Peak 2 - CN values	1p36.23	chr1:8024758-8318933(probes 3272:3437)	chr1:8208119-8218751(probes 3370:3376)	chr1:1-12567449(probes 1:5659)	4.2652e-06	0.00093323		Actual Copy Change Given	-0.55777	-0.013953	0	-0.7001	0.0076392	0.0064293	-0.73757	-0.01517	-0.83106	-0.87728	-0.86263	0	-0.44943	-0.76792	0.0114	-0.12148	-0.65258	0.033972	-0.39196	-0.31762	-0.78507	-0.82594	-0.059	-0.66494	-0.77133	-0.028218	-0.11234	-0.41289	-1.4077e-05	0.0042568	-0.00068543	-0.005814	-0.85098	-0.84579	-0.17651	-0.073209	-0.10263	-0.74742	0.0012481	0.005915	-0.32576
Deletion Peak 3 - CN values	1p32.3	chr1:50414095-51063392(probes 27031:27243)	chr1:50956568-50976325(probes 27202:27206)	chr1:50551342-51130755(probes 27093:27265)	1.4913e-05	1.9023e-05		Actual Copy Change Given	-0.53185	-0.013953	0	-0.72349	0.0076392	0.015866	-0.73757	0.0072431	-0.83106	-0.87728	-0.88299	0	-0.44943	-0.77677	0.0114	0.054518	-0.65155	0.033972	-0.39196	-0.0076101	-0.77829	-0.83341	0.0063871	-0.66494	-0.77133	-0.028218	0.0033299	-0.39553	-1.4077e-05	-0.00044055	0.02825	-0.65566	-0.8213	-0.83889	-0.16472	-0.04766	-0.023018	-0.70734	0.0012481	0.005915	-0.32542
Deletion Peak 4 - CN values	1q43	chr1:211843986-248956422(probes 114108:139258)	chr1:240770596-241359174(probes 134534:135006)	chr1:240023016-242725208(probes 133932:136036)	0.013434	0.10478		Actual Copy Change Given	0.040044	-0.006505	0	0.0079175	0.010006	0.10496	0.0077783	-0.019568	0.0079175	0.0086135	0.0093007	0.038884	0.011539	0.008892	0.054803	-0.09142	0.0098893	-0.4292	0.017684	-0.30698	0.018523	0.0091705	0.81903	0.011026	0.0069435	-0.048613	-0.28102	0.0013154	-0.1109	-0.0061883	-0.2708	0	0.014749	-0.0044312	-0.16781	-0.0044312	0.033831	0.012655	-0.05496	0.17567	0.0048579
Deletion Peak 5 - CN values	1q44	chr1:245118965-248956422(probes 137493:139258)	chr1:247600556-248956422(probes 139233:139258)	chr1:244315306-248956422(probes 137021:139258)	0.0042739	0.075328		Actual Copy Change Given	0.040044	-0.006505	0	0.060936	0.010006	0.10496	0.050534	-0.019568	0.0079175	0.0086135	0.0093007	0.038884	0.011539	0.008892	0.054803	-0.09142	0.0098893	-0.4292	0.017684	-0.31213	0.018523	0.061079	0.54277	0.011026	0.0069435	-0.048613	-0.28102	0.0013154	-0.13145	-0.0061883	-0.2708	0	0.014749	-0.0044312	-0.16064	-0.0044312	-0.050911	0.012655	-0.05496	0.17567	0.0048579
Deletion Peak 6 - CN values	2p25.3	chr2:1-2895405(probes 139259:140213)	chr2:686939-1913831(probes 139451:139452)	chr2:1-1914587(probes 139259:139455)	0.063706	0.063706		Actual Copy Change Given	0	0.0090312	0.004719	-0.01904	0.050534	0.001803	-0.0023553	0.0059913	-0.017941	-0.0047079	-0.025037	-0.16258	-0.00013862	-0.0084385	-0.26167	0.022164	0.1792	-0.039665	0.0029133	-0.30639	-0.015879	0	-1.2929	0.0057461	0.0033299	-0.1499	-0.38728	0.0038854	-0.033541	-0.0022621	-0.7506	-0.0031859	-0.014778	-0.01106	-0.18534	-0.01106	0.027076	0.0026357	0.0041632	0.0031362	0.00069327
Deletion Peak 7 - CN values	2q37.1	chr2:233207094-233619817(probes 278377:278628)	chr2:233305955-233349893(probes 278440:278472)	chr2:226832258-242193529(probes 274798:283832)	9.9196e-19	2.4441e-05		Actual Copy Change Given	0	-0.033405	-0.045364	0.064511	0.050534	-0.91935	0.033972	0.0071039	0.059162	-0.0060159	-0.014366	-0.11694	-0.0026322	-0.0084385	-0.13406	0.029888	-0.17208	-0.23043	-0.029448	-0.34595	0.023426	0	-0.33537	0.0416	0.035665	-0.031768	0	0	-0.018902	-0.0022621	0.0019494	-0.0078863	0.026233	0.00597	0.0024969	-0.01106	-0.44749	0.031577	-0.0020898	-0.033322	0.00069327
Deletion Peak 8 - CN values	2q37.3	chr2:241512301-242193529(probes 283816:283832)	chr2:241532316-242193529(probes 283832:283832)	chr2:226832258-242193529(probes 274798:283832)	1.1944e-24	7.6431e-16		Actual Copy Change Given	0	-0.040888	-0.045364	0.063587	0.050534	-0.90979	0.033972	0.0071039	0.069956	-0.0060159	-0.014366	-0.11694	-0.0026322	-0.0084385	-0.13406	0.029888	-0.17208	-0.63887	-0.0083005	-0.68524	0.023426	0	-0.33537	0.0416	0.035665	-0.11024	-0.20784	0	-0.018902	-0.0022621	-0.754	-0.068459	0.026233	0.00597	0.0024969	-0.01106	-0.44749	0.031577	-0.0020898	-0.033322	0.00069327
Deletion Peak 9 - CN values	3p21.1	chr3:41239154-84639096(probes 309694:335900)	chr3:52490559-52847219(probes 315121:315295)	chr3:45828390-54172039(probes 312209:316189)	0.0070302	0.0068576		Actual Copy Change Given	0.011121	-0.013815	0.0081959	0.063939	-0.063166	0.057653	0.066945	0.0055742	0.069239	0.04429	0.043865	0.022495	0.031295	0.0083351	0.0029133	0.0079175	0.05637	0.5245	0	-0.95326	0.04954	0.0871	-0.80236	0.046275	0.056085	0.0095883	0.082188	0.016425	0.0093098	0.0037011	0.010608	-0.15042	0.075847	0.062365	0.013353	-0.091442	-0.074945	0.054091	0.0048579	0.012461	0.0084743
Deletion Peak 10 - CN values	3q13.31	chr3:59049037-137769788(probes 319461:365025)	chr3:116707792-116722086(probes 352132:352139)	chr3:114819367-117459768(probes 350908:352762)	0.068215	0.068445		Actual Copy Change Given	-0.52604	0.023987	-0.34067	-0.00041585	0.044999	-0.066386	-0.010508	0.0055742	-0.0040162	-0.0060904	0.00097064	0.022495	0	0.0083351	-0.78932	-0.092389	-0.0071668	0.011539	0	0.0041632	-0.0012473	0.00027728	-0.72685	-0.0048461	-0.01849	0.0095883	-0.039937	-0.015736	-0.1281	0.0037011	0.025398	-0.078144	-0.020138	0	0.013353	-0.017941	0.013353	-0.0011087	0.0048579	-0.081419	0.0072217
Deletion Peak 11 - CN values	3q29	chr3:194781676-197302554(probes 399920:400673)	chr3:196043720-196094569(probes 400339:400362)	chr3:186574608-198295559(probes 394149:400919)	6.0376e-09	6.0376e-09		Actual Copy Change Given	0.0044411	0.011539	-0.010369	0.020063	0	-0.066386	0.0012481	-0.13016	0.047836	0.0015255	0.00097064	0.02466	0	0.0083351	-0.78538	-0.07921	-0.0060904	0.019923	0	0.0041632	-0.0012473	0.00027728	-0.76467	-0.0048461	-0.017391	-0.14142	0.00055459	-0.017116	-0.1281	0.0037011	0.025398	-0.61018	0.037217	0	0.013353	-0.017941	0.037329	-0.0011087	0.0048579	-0.071714	0.0072217
Deletion Peak 12 - CN values	4q31.23	chr4:129110965-155832021(probes 478068:493474)	chr4:148076252-148448454(probes 488925:489196)	chr4:129922366-190214555(probes 478623:512145)	1.0963e-08	0.0031228		Actual Copy Change Given	0.0011093	-0.28537	-0.33341	-0.010784	-0.007472	-0.069332	-0.01849	-0.0021956	-0.048613	-0.015406	-0.75426	-0.53882	-0.0070576	-0.77575	-0.40247	-0.27129	-0.022469	-0.13199	-0.015191	-0.0069195	-0.2429	-0.01904	-1.0564	-0.021179	-0.031632	0.02806	-0.24387	-0.2554	0.0034687	-0.0054758	-0.65042	0.043623	-0.047531	-0.0071958	-0.13057	0.003191	0.046275	-0.065581	-0.03245	0.0043862	-0.25019
Deletion Peak 13 - CN values	4q34.3	chr4:177990720-182139540(probes 507051:509362)	chr4:180603979-181161702(probes 508537:508541)	chr4:129922366-190214555(probes 478623:512145)	1.7595e-17	2.4441e-05		Actual Copy Change Given	0.011818	-0.26889	-0.33341	-0.010784	-0.0059522	-0.12901	-0.01849	-0.0021956	-0.050506	-0.015406	-0.75426	-0.60514	-0.0070576	-0.78737	-0.40247	-0.46408	-0.022469	-0.13199	-0.014165	-0.0069195	-0.2429	-0.01904	-1.0456	-0.024629	-0.031632	0.0020805	-0.24703	-0.2554	0.0034687	-0.0054758	-0.65042	0.043623	-0.047531	-0.0071958	-0.12966	0.0037465	0.031999	-0.065581	-0.03245	0.0043862	-0.25019
Deletion Peak 14 - CN values	4q35.2	chr4:186719102-190214555(probes 511379:512145)	chr4:187842498-190214555(probes 512145:512145)	chr4:129922366-190214555(probes 478623:512145)	1.5221e-18	2.5301e-08		Actual Copy Change Given	0.011818	-0.32623	-0.33341	-0.010784	-0.0059522	-0.12901	-0.01849	-0.0021956	-0.050506	-0.015406	-0.75426	-0.59567	-0.0070576	-0.78737	-0.40247	-0.46408	-0.022469	-0.13199	-0.014165	-0.0069195	-0.2429	-0.01904	-1.1064	0.013492	-0.031632	0.0020805	-0.24703	-0.2554	0.0034687	-0.0054758	-0.65042	0.043623	-0.047531	-0.0071958	-0.12966	0.0037465	0.031999	-0.065581	-0.03245	0.0043862	-0.25019
Deletion Peak 15 - CN values	5p15.33	chr5:1-6310986(probes 512146:516262)	chr5:1428400-1891706(probes 512274:512276)	chr5:1-6696934(probes 512146:516590)	0.00019164	0.00019467		Actual Copy Change Given	0.0040243	-0.13251	-0.074411	0.088258	-0.4055	-0.018078	0.045566	-0.0057462	0.051103	-0.0019399	0	-0.059296	-0.0022168	-0.023566	-0.0030475	-0.032314	0	-0.073076	-0.0075343	0.0079175	0	-0.0092666	0.017544	0.0037465	0.029466	-0.80584	-0.063838	0.025671	0.0055529	9.2497e-05	-0.16255	0.03637	0.0024969	-0.010184	0.21991	0.36953	-0.89151	0	-0.0023553	-0.65532	0.0027745
Deletion Peak 16 - CN values	5q34	chr5:156765791-172642578(probes 605343:616195)	chr5:164468639-164545699(probes 610447:610482)	chr5:140664708-181538259(probes 594435:621091)	7.6187e-08	0.00034134		Actual Copy Change Given	0.0056919	-0.096704	0.012934	0.0068044	-0.45447	-0.053476	-0.016429	-0.01932	-0.012162	-0.0019399	0	-0.020595	-0.0022168	0.0098669	-0.0030475	-0.43116	0	-0.058866	-0.0036011	-0.0063668	0	-0.014641	-0.80675	-0.0051227	-0.034217	0.0011093	-0.0049844	-0.00097017	0.0040031	0.0039789	-0.077204	-0.68533	-0.034223	-0.010324	-0.37132	0.39529	0.044857	0	-0.072942	-0.060125	0.0027745
Deletion Peak 17 - CN values	5q35.3	chr5:178197074-178605843(probes 619501:619784)	chr5:178206116-178234900(probes 619502:619524)	chr5:140664708-181538259(probes 594435:621091)	3.3216e-08	0.00011672		Actual Copy Change Given	0.0056919	-0.14747	0.0095883	0.0913	-0.45447	-0.060345	0.033408	-0.01932	0.045708	-0.0019399	0.039478	-0.001552	0.051387	-0.006505	-0.0030475	-0.43116	0	-0.0012473	-0.0036011	0.032563	0	0.045849	-0.84424	0.034113	0.036088	0.0011093	-0.0049844	0.034113	0.0040031	0.0039789	-0.077204	0.02511	0.058652	0.053379	-0.37324	0.39529	-0.057654	0	-0.072942	-0.060125	0.0027745
Deletion Peak 18 - CN values	6p25.3	chr6:1-1314427(probes 621092:621406)	chr6:1-1014045(probes 621092:621092)	chr6:1-1960675(probes 621092:621916)	0.0040492	0.0041733		Actual Copy Change Given	0.0058309	-0.0053992	-0.08413	0.016146	0.056513	0.023847	0.0079175	-0.0016416	0.012655	0	0.00069327	-0.030567	0.0012869	-0.0039546	0.006109	-0.1876	-0.0012473	-0.1338	0.013353	-0.014503	0.0114	0.015168	-0.20349	0.0091705	0.0053422	-0.14965	0.027497	0.0095883	0.0071496	-0.039465	-0.010501	0.045282	0.006109	-0.025042	0.011539	0.0084743	0.00458	0.016565	-0.066118	-0.045011	0.0090312
Deletion Peak 19 - CN values	6q22.31	chr6:108259005-150021106(probes 686311:712377)	chr6:124280267-124827878(probes 695575:695943)	chr6:123945938-125057006(probes 695410:696108)	0.079536	0.082435		Actual Copy Change Given	0.0058309	0.027778	0.013492	-0.0015243	0.054945	0.024969	-0.0051227	-0.12575	-0.0084385	-0.0022168	0.0034687	0.022136	-0.0014389	0.015308	0.006109	-0.62066	0.012097	-0.35099	0.0087528	0	-0.0019399	-0.006505	0.25668	-0.013713	-0.022527	-0.0087146	0.0038854	0.0062481	0.0090312	-0.0005997	0.030318	0.058081	-0.032178	-0.0042929	0.011539	0.0036076	-0.35225	-0.0029091	-0.0065914	-0.010976	0.0090312
Deletion Peak 20 - CN values	6q26	chr6:163346930-163666898(probes 721641:721848)	chr6:163412504-163580459(probes 721692:721777)	chr6:162847873-163743414(probes 721243:721909)	7.4714e-05	7.9986e-05		Actual Copy Change Given	0.0058309	-0.0011087	0.013492	0.0097276	0.10687	0.033127	-0.0051227	-0.12575	-0.0084385	-0.0022168	0.0034687	0.022136	-0.0014389	0.015308	0.006109	-0.62026	0.012097	-0.18722	0.0087528	0	-0.0019399	-0.006505	0.23426	0.0043021	-0.0069195	-0.8848	0.0038854	0.0062481	0.0090312	-0.0005997	0.030318	0.10585	-0.0018014	-0.0042929	0.011539	0.0036076	-0.37921	-0.0041546	-0.0065914	-0.010976	0.0090312
Deletion Peak 21 - CN values	7p22.3	chr7:1-4684690(probes 725656:727854)	chr7:1-721089(probes 725656:725666)	chr7:1-4422837(probes 725656:727664)	0.0057255	0.0057734		Actual Copy Change Given	0.48682	-0.37313	0.019083	-0.71015	-0.023566	-0.92964	0.059937	-0.096816	0.05908	0.031718	0.0011093	0.034649	0.0029133	0.0033299	0.0015255	0.074442	0.027497	-0.22859	-0.0081624	0.011261	0.046275	0.061794	0.11213	0.049966	0.94711	0.027638	0.020203	0.00041593	-0.15029	-0.00028255	-0.022051	0.64598	0.060365	0.058081	-0.40584	0.84514	-0.060883	0.0058309	-0.16815	0.0046641	0.0030763
Deletion Peak 22 - CN values	8p23.2	chr8:2166023-6404670(probes 817237:820314)	chr8:2926897-4996752(probes 817318:819886)	chr8:3958700-3961600(probes 818603:818604)	0.022115	0.022115		Actual Copy Change Given	-0.0011087	0.05281	0.0044411	-0.0015243	-0.33063	0.59404	0.00458	0.00015988	-0.0042929	0.00055459	-0.0071958	0.036907	-0.0018014	-0.0018014	0	-0.14451	-0.066252	-0.078272	0.010982	0.0095883	0.012376	0.0077783	-0.75923	0.0037465	-0.0020784	0.0081959	0.045141	-0.0035386	-0.0038009	0.0063499	0.0061727	0.020343	0.014888	0.013632	-0.10592	0.001803	0.10439	0.0016642	0.11404	0.010091	-0.0016629
Deletion Peak 23 - CN values	8q24.3	chr8:143414185-145138636(probes 906241:906457)	chr8:143565795-143610162(probes 906282:906293)	chr8:142447040-145138636(probes 905887:906457)	0.00087616	0.00089511		Actual Copy Change Given	-0.0011087	0.37874	0.067088	0.14162	-0.36204	0.66235	0.0098669	0.074718	0.13066	0.00055459	-0.0071958	0.041713	-0.0011087	-0.0018014	0.048262	0.079159	-0.066252	0.59134	0.010982	0.031014	0.011539	0.080456	1.43	0.092025	0.017684	0.0081959	0.71049	-0.0031859	0.0076392	0.0095429	0.77253	0.020343	0.03369	0.059794	0.0051028	0.001803	0.36953	0.01433	-0.0018014	0.067318	0.00097064
Deletion Peak 24 - CN values	9p24.3	chr9:1-844486(probes 906458:906513)	chr9:1-789931(probes 906458:906458)	chr9:1-4903708(probes 906458:909957)	6.0742e-06	7.4351e-05		Actual Copy Change Given	0.017124	-0.48165	-0.052531	-0.18999	0.037924	-0.94049	-0.0042929	-0.000256	-0.0020784	0.010982	-0.74194	-0.11014	0.0044411	0.00027728	0.00097064	-0.28037	-0.59618	-0.38369	0.015552	0.0062481	0.003191	0.012428	-0.83486	-0.0023553	-0.011577	-0.057385	0.23117	-0.00013862	-0.0036011	-0.0076552	-0.80908	0.026233	-0.029721	0.0068044	-0.78328	0.027216	-0.11064	0	-0.11339	0.58535	9.7085e-05
Deletion Peak 25 - CN values	9p23	chr9:7799607-10619051(probes 911728:913849)	chr9:8310705-10619051(probes 912198:913849)	chr9:8268199-9728353(probes 912164:913173)	1.8285e-06	1.4913e-05		Actual Copy Change Given	0.017124	-0.48165	-0.052531	-0.18999	0.099288	-0.36318	-0.0042929	-0.000256	-0.0020784	0.010982	-0.74194	-0.11014	0.0044411	0.00027728	0.00097064	-0.28037	-0.59618	-0.38369	0.015552	0.0062481	0.003191	0.012428	-0.83486	-0.0023553	-0.011577	-0.057385	0.23117	-0.00013862	-0.0036011	-0.0076552	-0.0089831	0.026233	-0.029721	0.0068044	-0.77151	0.027216	0.00027728	0	-0.11339	0.58338	9.7085e-05
Deletion Peak 26 - CN values	9p21.3	chr9:21865499-21997723(probes 921929:921992)	chr9:21959053-21997723(probes 921979:921992)	chr9:18599718-32318827(probes 919318:928412)	4.847e-79	1.3601e-67		Actual Copy Change Given	-1.0568	-0.48165	-0.052531	-0.18999	-0.75245	-0.36318	-0.15144	-0.000256	-0.0020784	0.010982	-0.72225	-0.11014	0.0044411	0.00027728	-0.0040575	-0.28037	-0.59618	-0.64837	0.015552	0.0062481	0.003191	0.012428	-0.83486	-0.0023553	0.0080567	-0.067592	0.23783	-0.00013862	-0.0036011	-0.0076552	-0.0089831	0.010982	-0.029721	0.0068044	-0.76775	-0.012438	0.00027728	0	-0.11339	0.58338	9.7085e-05
Deletion Peak 27 - CN values	9p21.3	chr9:22449927-23507724(probes 922312:923017)	chr9:22646075-22829484(probes 922441:922567)	chr9:18599718-32318827(probes 919318:928412)	3.0552e-38	2.2624e-06		Actual Copy Change Given	-0.56186	-0.48165	-0.052531	-0.18999	0.033127	-0.36318	-0.15144	-0.000256	-0.0020784	0.010982	-0.72225	-0.11014	0.0044411	0.00027728	-0.0040575	-0.28037	-0.59618	-0.5127	0.015552	0.0062481	0.003191	0.012428	-0.80302	-0.0023553	0.0080567	-0.067592	0.23783	-0.00013862	-0.0036011	-0.0076552	-0.0089831	0.010982	-0.029721	0.0068044	-0.76775	-0.012438	0.00027728	0	-0.11339	0.58338	9.7085e-05
Deletion Peak 28 - CN values	9q21.11	chr9:37783146-83625561(probes 931741:943612)	chr9:38747692-68531616(probes 932487:932568)	chr9:68478305-68482925(probes 932528:932529)	0.11919	0.11671		Actual Copy Change Given	0.0094491	0.0043021	-0.036946	-0.096308	0.033127	-0.076012	0.012655	-0.000256	0.0068044	0.010982	-0.72225	-0.0045972	0.0044411	0.00027728	-0.27965	0.035524	0.015866	0.029888	0.015552	-0.00055288	0.0082431	0.012428	-0.057789	-0.0023553	0.0080567	0.0058309	-0.0032987	-0.00013862	-0.0036011	-0.014949	-0.0089831	0.010982	0.050819	0.0068044	0.010944	0.013492	-0.062361	-0.00027174	0.32028	0.0031362	9.7085e-05
Deletion Peak 29 - CN values	10q23.31	chr10:87553251-87819888(probes 1037635:1037827)	chr10:87750473-87819888(probes 1037786:1037827)	chr10:87742067-87869588(probes 1037780:1037869)	0.0021615	0.0021534		Actual Copy Change Given	-0.53926	-0.15924	-0.089655	0.016425	-0.60545	0.045141	0.0044411	-0.004825	0.011539	0.003191	0.0038854	-0.022223	0.004719	0	-0.0045695	-0.40639	0.014609	0.0030522	-0.00068747	-0.28453	0.014609	0.010842	-0.81392	0.008892	0.0055528	-0.10933	0.0098669	-0.036129	-0.021235	-0.0017081	-0.000824	-0.65752	0.016425	0.011261	-0.28928	-0.91492	-0.013677	0.010564	0.0029133	-0.0014405	-0.00041585
Deletion Peak 30 - CN values	10q26.3	chr10:133376759-133400839(probes 1068845:1068856)	chr10:133376926-133393368(probes 1068847:1068855)	chr10:103225280-133797422(probes 1047424:1068862)	1.2064e-19	1.2064e-19		Actual Copy Change Given	-0.56694	-0.20548	-0.089037	0.016425	-0.44771	-0.0044312	0.0087528	-0.042225	0.010842	0.003191	0.0038854	0.012767	0.0026486	-0.016776	-0.0042929	-0.45855	0.0095883	-0.044551	-0.00068747	-0.28453	0.013155	0.010842	-0.85742	0.008892	0.0055528	-0.14232	0.0098669	-0.045906	-0.021235	-0.0048709	0.32996	-0.65752	0.033267	0.0073609	-0.2952	-0.91492	-0.64846	0.010564	0.0029133	-0.0014405	-0.00826
Deletion Peak 31 - CN values	11p15.5	chr11:1-1878794(probes 1068863:1069289)	chr11:1381972-1472378(probes 1069156:1069169)	chr11:1-14777259(probes 1068863:1078473)	6.4175e-17	6.4175e-17		Actual Copy Change Given	-0.005814	-0.0026322	0.0056919	0.79646	-0.33802	-0.086916	0.016705	-0.013122	0.088113	0.0081959	-0.078544	-0.43212	0.0051359	-0.0051227	0.0093098	-0.0070576	0.0038854	0.13495	0.029606	-0.66716	0.022865	0.12948	-0.84787	0.012655	0.0049969	0.009578	-0.14554	0.00097177	-0.022101	-0.076968	-0.8186	-0.1637	0.72433	0.071678	0.0029133	-0.49277	-0.072541	0.019783	0.006109	-0.22778	-0.010892
Deletion Peak 32 - CN values	11p12	chr11:38655116-41714729(probes 1094759:1096789)	chr11:40111584-41460785(probes 1095617:1096606)	chr11:40811433-40815698(probes 1096112:1096113)	0.042277	0.041458		Actual Copy Change Given	-0.005814	0.029948	0.0056919	0.0065262	-0.26961	-0.01143	-0.0015103	-0.0097974	-0.0081624	0.0081959	-0.0059522	-0.003352	-0.0020033	-0.0051227	0.0036976	-0.0070576	0.0038854	0.00041593	0.013615	-0.66716	-0.0021261	-0.0010199	-0.80881	0.012655	0.0049969	0.016006	-0.0031859	0.0021273	0.0072217	0.0041178	-0.79126	-0.17335	0.64983	-0.0026322	0.0080567	-0.43377	0.074121	0.0010666	0.006109	-0.0071122	-0.00041585
Deletion Peak 33 - CN values	11q25	chr11:130915311-135086622(probes 1148612:1150958)	chr11:134245688-135086622(probes 1150945:1150958)	chr11:134188309-135086622(probes 1150912:1150958)	0.11695	0.11671		Actual Copy Change Given	0.0056919	-0.50857	0.019783	0.0090312	-0.25998	1.0111	-0.0077521	-0.0016416	0.014888	0.0062481	-0.0084385	0.07438	0.0068044	-0.022812	0.024127	-0.0060904	0.0076392	-0.60844	-0.034359	-0.00069303	-0.011335	0.0030522	0.35463	0.00055459	-0.0010316	-0.072007	0.32237	0.0041632	0.058652	0.0041178	0.010293	-0.10132	0.70645	0.74195	0.027778	-0.43268	0.42452	0.00097064	0.11829	0.21186	0
Deletion Peak 34 - CN values	12p13.33	chr12:1-992097(probes 1150959:1151067)	chr12:1-780735(probes 1150959:1150959)	chr12:1-929599(probes 1150959:1151032)	0.070114	0.12877		Actual Copy Change Given	-0.0041546	0.025952	0.17272	0.044432	0.010842	0.17257	0.04259	0.032707	0.03637	0.0072217	0.11228	0.0071939	0.0033299	0.0090843	-0.012162	0.045566	-0.012576	0.0095883	-0.0062286	0.64213	0.035524	0.033549	1.6563	0.038065	0.036088	0.012376	0.24373	0.0038854	0.008892	0.0043957	1.4132	0.013213	0.061508	0.035665	0.006109	0	-0.0067813	0.027638	-0.020138	0.0086978	-0.00013862
Deletion Peak 35 - CN values	12p13.1	chr12:12691300-12768198(probes 1158257:1158299)	chr12:12715371-12727447(probes 1158274:1158276)	chr12:12436591-13187439(probes 1158059:1158378)	0.001787	0.0031362		Actual Copy Change Given	-0.0041546	0.069197	0.046133	0.044432	0.010842	-0.70997	0.0068044	-0.00081037	0.03637	0.0072217	-0.00041585	0.0071939	0.0033299	0.0090843	-0.012162	0.045566	-0.012576	0.0095883	-0.028491	-0.005261	-0.0037395	0.033549	0.06208	0	-0.014228	0.012376	0.011539	0.0038854	0.008892	0.0043957	1.0999	0.013213	0.061508	0.035665	0.006109	0	0.016286	0.027638	-0.020138	0.0086978	-0.00013862
Deletion Peak 36 - CN values	12q12	chr12:32893588-39295175(probes 1171647:1172261)	chr12:33368173-38909921(probes 1171999:1172046)	chr12:38827291-52830616(probes 1172001:1179845)	0.0020877	0.047374		Actual Copy Change Given	-0.0041546	0.012376	-0.0040162	-0.0016629	0.0070451	0.0079175	-0.0037395	-0.00081037	-0.0071958	0.0072217	-0.00041585	0.0071939	0.0033299	0.0019418	-0.012162	-0.13199	-0.012576	0.0095883	-0.076145	-0.0087146	-0.0037395	-0.0008316	-0.81162	0	-0.014228	-0.28192	-0.23141	0.0038854	-0.15733	-0.0013006	0.032993	0.013213	-0.0040162	-0.0056757	0.006109	0	-0.12772	-0.0033243	-0.020138	-0.28874	-0.00013862
Deletion Peak 37 - CN values	12q12	chr12:41765153-44508684(probes 1173880:1175188)	chr12:42613726-42718949(probes 1174395:1174469)	chr12:38827291-52830616(probes 1172001:1179845)	9.9286e-07	0.0031228		Actual Copy Change Given	-0.0041546	-0.06048	-0.0040162	-0.0016629	0.0070451	0.0079175	-0.0037395	-0.00081037	-0.0071958	0.0072217	-0.00041585	0.012348	0.0033299	0.0019418	-0.012162	-0.13199	-0.012576	0.0095883	-0.076145	-0.0087146	-0.0037395	-0.0008316	-0.77897	0	-0.014228	-0.37414	-0.23141	0.0038854	-0.15733	-0.0013006	-0.050228	0.013213	-0.0040162	-0.0056757	0.006109	0	-0.20037	-0.0033243	-0.020138	-0.15827	-0.00013862
Deletion Peak 38 - CN values	12q13.11	chr12:47362874-47786724(probes 1176883:1177076)	chr12:47771224-47786724(probes 1177071:1177076)	chr12:38827291-52830616(probes 1172001:1179845)	3.8673e-05	0.009326		Actual Copy Change Given	-0.0041546	-0.06048	-0.0040162	0.060794	-0.038714	0.0079175	-0.0037395	-0.00081037	0.062223	0.0072217	-0.00041585	0.012348	0.0033299	0.0019418	-0.012162	-0.11142	0.026935	0.0095883	-0.076145	-0.0087146	-0.0037395	-0.0008316	-0.77897	0.056655	0.046417	-0.37414	-0.23141	0.0038854	-0.15733	-0.040357	-0.050228	0.013213	0.063652	0.054091	0.006109	-0.055769	-0.28263	0.040185	-0.020138	-0.15827	-0.00013862
Deletion Peak 39 - CN values	12q21.1	chr12:1-133275309(probes 1150959:1229415)	chr12:71337025-71591760(probes 1191262:1191351)	chr12:71542832-71543213(probes 1191307:1191308)	0.20268	0.34041		Actual Copy Change Given	-0.0041546	-0.056173	-0.0040162	0.00069327	0.0027745	-0.00027724	-0.0087691	-0.00081037	-0.0036011	0.0072217	-0.0045695	0.012348	0.0033299	0.0019418	-0.012162	-0.2843	-0.0083005	0.0070826	-0.076145	-0.0087146	-0.01037	-0.0053992	-0.74516	-0.0011087	-0.015329	-0.37414	-0.24257	0.0013868	-0.15631	-0.03711	-0.014358	-0.032587	-0.040888	-0.0089906	0.006109	-0.0063668	-0.17297	-0.0069195	-0.020138	-0.15827	-0.00013862
Deletion Peak 40 - CN values	12q24.11	chr12:109567600-109834639(probes 1216145:1216293)	chr12:109568374-109603766(probes 1216146:1216161)	chr12:108686255-112445562(probes 1215645:1217427)	0.0033709	0.0042739		Actual Copy Change Given	-0.0041546	-0.087181	-0.0040162	0.0467	0.0027745	-0.028355	0.039195	-0.00081037	0.034677	0.0072217	-0.0045695	0.012348	0.0033299	0.0019418	-0.012162	-0.2843	-0.0083005	-0.00027724	-0.076145	-0.30463	0.030591	0.09043	-1.0478	0.04259	0.034113	-0.37414	-0.24156	0.01419	-0.14451	-0.48862	-0.057916	0.020483	0.053806	0.039902	0.0035629	-0.0063668	-0.28144	0.031155	-0.020138	-0.15827	-0.00013862
Deletion Peak 41 - CN values	13q12.11	chr13:1-25246913(probes 1229416:1233315)	chr13:19553746-19953270(probes 1229858:1229859)	chr13:1-29026277(probes 1229416:1236139)	0.0021534	0.0086179		Actual Copy Change Given	-0.0085766	-0.43029	-0.097891	0.00027728	-0.20672	-0.014916	-0.0055375	-0.0021956	0.011121	-0.8807	-0.0059522	0.016677	-0.0023553	-0.011198	-0.0021004	-0.20983	-0.006505	-0.63349	-0.022881	-0.0040162	-0.0041546	0.0016642	-0.83478	0.001803	0	0.00027728	-0.023429	-0.0041546	-0.015329	-0.46327	-0.015046	-0.63585	0.0087528	0.0052749	-0.13135	-0.16625	-0.84707	-0.061823	-0.19099	-0.0054538	0.17452
Deletion Peak 42 - CN values	13q14.2	chr13:48707156-59665867(probes 1250283:1255421)	chr13:49906216-51050145(probes 1250929:1250933)	chr13:42146599-92951751(probes 1245612:1276597)	7.864e-06	0.00019467		Actual Copy Change Given	-0.0085766	-0.40716	-0.1698	0.00027728	-0.20672	-0.014916	-0.0055375	-0.0021956	0.016845	-0.8807	-0.0059522	0.016677	-0.11535	0.0086135	-0.0021004	-0.15407	-0.006505	-0.67288	-0.022881	-0.0040162	-0.0041546	0.0016642	-0.82293	0.001803	0	-0.10749	-0.023429	-0.0041546	-0.015329	-0.76982	-0.34216	-0.63585	0.013492	0.0052749	-0.13135	-0.16612	-0.8079	-0.061823	-0.19547	-0.0054538	-0.25119
Deletion Peak 43 - CN values	13q31.1	chr13:60693043-94437493(probes 1256017:1277726)	chr13:79566094-79808117(probes 1268387:1268545)	chr13:42146599-92951751(probes 1245612:1276597)	0.003823	0.026517		Actual Copy Change Given	-0.038306	-0.40617	-0.16357	-0.02187	-0.20672	-0.014916	-0.019784	-0.0021956	-0.026457	-0.86774	-0.0021245	0.016677	-0.11299	0.0086135	-0.0021004	-0.15407	-0.006505	-0.023158	-0.022881	-0.0040162	-0.0041546	-0.024388	-0.82293	-0.013271	-0.033814	-0.10749	-0.023429	-0.0041546	-0.015329	-0.76255	-0.34216	-0.64008	-0.042517	-0.017666	-0.14165	-0.16612	-0.8079	-0.061823	-0.059269	-0.0054538	-0.25119
Deletion Peak 44 - CN values	13q34	chr13:113928871-114364328(probes 1291232:1291306)	chr13:114221859-114364328(probes 1291306:1291306)	chr13:113892395-114364328(probes 1291220:1291306)	0.0090982	0.009326		Actual Copy Change Given	-0.020412	-0.41915	-0.078144	0.030591	-0.20672	-0.014916	-0.019784	0.69506	0.013772	-0.89505	-0.007472	0.016677	-0.11299	-0.014778	0.0081959	-0.15503	-0.006505	-0.73941	-0.022881	-0.0040162	-0.0041546	-0.00041585	0.063695	-0.013271	-0.010922	0.015028	-0.25151	-0.0041546	-0.015329	-0.79338	-0.34216	-0.64407	0.010564	0.0098669	-0.1351	-0.16612	-0.86326	-0.066403	-0.015329	-0.0054538	-0.26729
Deletion Peak 45 - CN values	14q12	chr14:1-33709197(probes 1291307:1299312)	chr14:26466451-26599957(probes 1294843:1294908)	chr14:26527415-26533292(probes 1294876:1294877)	0.21661	0.21571		Actual Copy Change Given	-0.00055444	-0.11521	0.0041632	-0.11757	-0.77778	0.029044	0.00083195	0.0043234	0.0024969	0.0053841	0.0081959	0.016397	0.0056919	0.0073609	0.0062481	-0.28026	0.015447	0.016425	-0.022606	0.010424	-0.0029021	0.0055529	0.17815	0.003191	-0.0083005	0.012934	-0.06142	0.0065262	0.00013863	0.0013415	0.023574	-0.65389	0.01447	-0.87256	-0.32635	-0.88163	0.079015	-0.0038779	-0.0018014	0.0029973	0.0016642
Deletion Peak 46 - CN values	14q23.2	chr14:52692735-92119346(probes 1310705:1336204)	chr14:63846344-64229670(probes 1317964:1318190)	chr14:58510832-96129299(probes 1314666:1339233)	0.0049282	0.22992		Actual Copy Change Given	-0.00055444	-0.17196	-0.24265	-0.26252	-0.77778	-0.024524	0.00083195	0.0043234	0.0024969	0.0053841	-0.73354	0.016397	0.0056919	-0.77778	0.0062481	-0.6236	0.015447	-0.49923	0.0094491	-0.66031	0.030451	0.0055529	-0.73161	0.0351	0.040044	-0.06424	-0.06142	0.0065262	0.00013863	0.0013415	0.023574	-0.65389	0.059223	-0.87256	-0.3304	-0.14965	0.055088	-0.0038779	-0.0018014	0.0029973	0.0016642
Deletion Peak 47 - CN values	14q24.3	chr14:55350764-96256281(probes 1312414:1339349)	chr14:74342546-74739601(probes 1324610:1324828)	chr14:58510832-96129299(probes 1314666:1339233)	0.00014685	0.068445		Actual Copy Change Given	-0.00055444	-0.17196	-0.24265	-0.26252	-0.77778	-0.024524	0.041741	0.0043234	0.053521	0.0053841	-0.73354	0.016397	0.014834	-0.77778	0.0062481	-0.6236	0.015447	-0.56356	0.0094491	-0.66031	0.030451	0.048688	0.066515	0.0351	0.040044	-0.16064	-0.06142	0.0065262	0.00013863	0.0013415	-0.0067737	0.029606	0.059223	-0.87256	-0.29804	-0.14965	-0.01354	-0.0038779	-0.0018014	0.0029973	0.0016642
Deletion Peak 48 - CN values	14q32.12	chr14:66496435-107043718(probes 1319698:1344576)	chr14:93711112-93790072(probes 1337212:1337252)	chr14:58510832-96129299(probes 1314666:1339233)	0.0016881	0.12171		Actual Copy Change Given	-0.00055444	-0.18697	-0.053611	-0.19337	-0.80177	-0.024524	0.043865	0.0043234	0.055515	0.018103	-0.73354	-0.025784	0.016565	-0.77778	0.0062481	-0.65901	0.015447	-0.23129	0.0055529	-0.62631	0.030451	0.050677	0.071248	0.033408	0.04259	-0.14534	-0.06142	0.0065262	0.00013863	0.0013415	-0.0067737	0.0024969	0.068665	-0.87256	-0.29804	-0.14965	0.75127	0.032563	-0.0018014	0.0029973	0.0016642
Deletion Peak 49 - CN values	15q21.3	chr15:1-62826190(probes 1344577:1368357)	chr15:57217764-57291102(probes 1364033:1364065)	chr15:56955143-57327087(probes 1363904:1364088)	0.054746	0.05691		Actual Copy Change Given	-0.00097017	0.11726	-0.32391	0.018243	-0.23728	0.015168	0.016565	-0.001226	0.010564	0.022725	0.027357	0.0070548	0.016146	0.0086135	0.0058309	-0.14824	0.0054139	0.031999	0.019783	-0.0013858	-0.41256	0.023566	0.020763	0.024127	0.019962	0.006109	0.0076392	0.01447	0.00069327	-0.0094497	0.0036152	0.010006	-0.87182	0.034818	-0.36997	0.025671	0.030451	0.016705	-0.00041585	-0.0058686	-0.00055444
Deletion Peak 50 - CN values	17q25.3	chr17:82646638-83257441(probes 1479938:1480108)	chr17:82828540-83257441(probes 1480025:1480108)	chr17:82745570-83257441(probes 1479991:1480108)	0.1409	0.14255		Actual Copy Change Given	-0.049965	0.37019	-0.0085766	0.14162	0.28881	0.81337	0.095798	-0.24141	0.10122	0.068092	0.084065	0.016258	0.029747	0.0086135	-0.075345	-0.1092	0.071822	0.024689	0.09246	0.034395	0.067518	0.11272	0.052668	0.10293	0.091445	-0.0071958	0.027919	0.025531	0.00041593	0.0046736	-0.12875	-0.03681	0.11096	0.96596	0.17694	-0.083067	-0.078943	0.088837	0.00013863	0.001332	-0.00069303
Deletion Peak 51 - CN values	18q23	chr18:77990855-80373285(probes 1525464:1526376)	chr18:79063009-80373285(probes 1526239:1526376)	chr18:79025790-80373285(probes 1526184:1526376)	0.076162	0.075328		Actual Copy Change Given	0.0022193	-0.024798	-0.21317	-0.012576	-0.72826	-0.0033243	-0.0012473	-0.035972	0	-0.10513	-0.0056757	-0.044036	-0.0062286	-0.0073339	0.012934	-0.13536	-0.005261	-0.2133	-0.0096806	0.095508	0.00061351	-0.0040162	0.14132	-0.0055375	-0.0080244	-0.31061	-0.052531	-0.0034627	0.16852	0.0012028	0.26452	0.086811	-0.70343	-0.15911	-0.18333	0.017264	-0.015879	-0.00055444	-0.019863	-0.090148	-0.0012473
Deletion Peak 52 - CN values	19q13.31	chr19:44032909-44434615(probes 1545783:1546018)	chr19:44050627-44074022(probes 1545800:1545813)	chr19:41383356-58617616(probes 1544813:1552887)	3.2319e-07	0.0056373		Actual Copy Change Given	0.43344	-0.45715	-0.083598	-0.67518	-0.10342	-0.00097017	-0.69505	-0.00067179	-0.78176	-0.82911	-0.83809	-0.016732	-0.41838	-0.72252	-0.013953	-0.62939	-0.61748	-0.51764	-0.36238	0.021744	-0.75932	-0.79352	-0.39241	-0.62016	-0.72941	-0.26396	0.03214	-0.37595	-0.0012473	0.0058707	-0.31657	-0.096836	-0.80385	-0.79352	-0.023703	0.71923	0.03369	-0.67765	-0.012162	-0.00088633	-0.30991
Deletion Peak 53 - CN values	19q13.43	chr19:55771702-55837268(probes 1551181:1551259)	chr19:55784874-55837268(probes 1551185:1551259)	chr19:41383356-58617616(probes 1544813:1552887)	9.6285e-20	1.5425e-17		Actual Copy Change Given	0.43344	-0.45715	-0.083598	-0.72641	-0.10342	-0.00097017	-0.73363	-0.00067179	-0.78176	-0.83978	-0.83809	-0.73013	-0.41838	-0.72252	-0.013953	-0.62684	-0.61748	-0.55146	-0.36238	-0.63321	-0.75932	-0.79352	-0.39241	-0.65202	-0.76407	-0.26667	0.023126	-0.37595	-0.0012473	0.0077329	-0.028074	0.95632	-0.84939	-0.8498	-0.023703	0.71791	-0.10211	-0.67765	-0.012162	-0.00088633	-0.30991
Deletion Peak 54 - CN values	22q13.32	chr22:42715230-50818468(probes 1629830:1634701)	chr22:48536387-48549197(probes 1634411:1634416)	chr22:42829187-50818468(probes 1629876:1634701)	0.0048726	0.0049145		Actual Copy Change Given	-0.30451	-0.13807	-0.0083005	0.17679	0.07671	-0.098418	0.073977	0.0068257	0.074121	0.050819	0.031295	-0.15761	0.035242	0.012655	-0.011335	0	-0.079609	-0.16332	0.037217	0	0.077574	0.070817	-0.82783	0.078727	0.083598	0.15293	-0.00041585	0.027357	-0.0034627	-0.54968	-0.049146	-0.019589	0.11364	0.081177	-0.28525	-0.019314	-0.073343	0.061365	-0.030404	-0.092398	0.0022193
cytoband	12q14.1	7p11.2	4q12	2q24.2	1q32.1	12p13.32	4q28.1	8q24.21	7q34	4q12	2p12	19p13.3	12p13.33	13q34	2q32.1	10p15.3	11q25	12q15	2p24.3	12p12.1	12q14.1	7q21.2	3q26.33	11q24.1	1q22	12q13.12	16p13.2	12q24.31	12q21.1	12q15	4p16.3	12q24.33	2q24.2	6q21	17q23.2	15q26.3	7q32.3	1q42.3	2p16.3	7p12.2	9q34.3	6p21.2	9p13.3	6p21.31	7p11.2	5p15.33	9p24.1	12q24.21	1q43
q value	7.1822e-57	3.4188e-42	1.1839e-28	1.2517e-09	1.3307e-09	3.4642e-13	2.8116e-08	1.5782e-06	2.2495e-05	2.9112e-12	9.1227e-05	9.1227e-05	4.6601e-10	0.00028549	0.00036091	0.0006451	1.2126e-05	0.00015865	0.0017189	0.0025124	5.0211e-08	0.0033175	0.0043952	4.2849e-05	0.0059835	0.0065134	0.009082	0.0035993	0.0068011	0.0014658	0.018734	0.0051698	0.02233	0.023306	0.007639	0.034568	0.0049897	0.036008	0.055553	0.013217	0.096444	0.051148	0.11647	0.067348	3.2791e-06	0.14558	0.151	0.05782	0.12791
residual q value	1.0811e-55	2.9116e-41	1.4329e-25	1.2517e-09	1.3307e-09	2.6389e-09	2.8116e-08	1.5782e-06	6.4355e-05	8.3327e-05	9.1227e-05	9.1227e-05	0.00012249	0.00028549	0.00036091	0.0006451	0.0008435	0.00085953	0.0017189	0.0025124	0.0025324	0.0041639	0.0043952	0.0050841	0.0059835	0.0065134	0.009082	0.013788	0.013788	0.017266	0.018734	0.019565	0.02233	0.023306	0.032107	0.034568	0.04195	0.045731	0.055553	0.067348	0.096444	0.10677	0.11647	0.13217	0.13217	0.14558	0.151	0.151	0.16646
wide peak boundaries	chr12:57731613-57762726	chr7:54876881-55037263	chr4:54138220-54176172	chr2:160339472-160361647	chr1:204340511-204347299	chr12:3912358-3955080	chr4:124720152-124724948	chr8:121868709-132153675	chr7:142554532-142768622	chr4:52878830-52910638	chr2:74925804-75002103	chr19:713557-807591	chr12:2341300-2395869	chr13:107961957-110429710	chr2:184283698-184309200	chr10:1-1429569	chr11:131106864-131117834	chr12:68764829-68866975	chr2:15916056-16177446	chr12:21539025-21557219	chr12:58455940-58479055	chr7:92245373-92901034	chr3:178113820-182014388	chr11:117988132-128672305	chr1:156428190-156626306	chr12:50388331-50715346	chr16:8821049-9134674	chr12:123723022-123831543	chr12:71630601-71654761	chr12:69769597-69787646	chr4:1777070-1815700	chr12:128905470-129044361	chr2:159099064-159108039	chr6:106791533-107057044	chr17:62969370-63016546	chr15:98164092-100208002	chr7:130248495-132731700	chr1:234852274-234871308	chr2:50636136-51136216	chr7:48975035-52994172	chr9:122982779-138394717	chr6:38771159-39770036	chr9:34794594-36967961	chr6:35690565-37949576	chr7:56356124-56535784	chr5:1287426-1308958	chr9:7997400-8024196	chr12:114685071-114768559	chr1:241903683-245642345
genes in wide peak	CDK4	EGFR	[GSX2]	RBMS1	PLEKHA6	[PARP11]	[ANKRD50]	ADCY8	PRSS1	SCFD2	POLE4	PALM	CACNA1C	COL4A1	[MIR548AE1]	ADARB2	[SNX19]	CPM	MYCN	GYS2	[LOC101927653]	KRIT1	ACTL6A	ACRV1	MEF2D	DIP2B	PMM2	ATP6V0A2	ZFC3H1	RAB3IP	FGFR3	GLT1D1	TANC1	C6orf203	TANC2	IGF1R	CPA1	[LOC101927851]	NRXN1	DDC	ABCA2	DNAH8	CA9	CDKN1A	DKFZp434L192	TERT	[TMEM261]	[TBX3]	ADSS
	CYP27B1							ANXA13	MTRNR2L6		LINC01291	PTBP1		COL4A2		IDI1		MDM2	MYCNOS			CDK6	NDUFB5	ARCN1	C1orf61	LARP4	USP7	DNAH10			LETM1			CD24		MEF2A	CPA2		LOC730100	GRB10	ABL1	GLP1R	CCIN	CLPS	LOC650226				HNRNPU
	TSPAN31							KCNQ3				MISP		LIG4		ZMYND11		SLC35E3	MYCNUT			PEX1	PIK3CA	CXCR5	GPATCH4	FAM186A	CARHSP1									HSP90B2P	MEST		MIR8485	IKZF1	ABO	KCNK5	CD72	MAPK14	LOC100240728				CEP170
	2021-03-09							MYC				MIR4745		IRS2		WDR37		LOC100130075	GACAT3			ERVW-1	SOX2	CBL	HAPLN2	SNORD133	C16orf72									SYNM	MKLN1			ZPBP	AK1	SAYSD1	CLTA	FKBP5	LOC101928401				AKT3
	AGAP2							NDUFB9						TNFSF13B		DIP2C						ANKIB1	FXR1	CD3D	IQGAP3											TTC23	PODXL			COBL	ASS1	KCNK16	FANCG	PIM1					ZBTB18
	MIR6759							POU5F1B						MYO16		LARP4B						GATAD1	USP13	CD3E	NAXE											LRRC28	COPG2			FIGNL1	C8G	KCNK17	NPR2	MAPK13					SDCCAG8
								PVT1						ABHD13		GTPBP4						RBM48	KCNMB2	CD3G	TTC24											LYSMD4	CPA4			VWC2	CACNA1B	KIF6	PAX5	SRSF3					DESI2
								SQLE						MYO16-AS1		IDI2-AS1						FAM133B	RNU6-1	CHEK1	LOC101928177											PGPEP1L	COPG2IT1			DDC-AS1	KYAT1	LOC100131047	RMRP	SRPK1					KIF26B
								MTSS1						LINC00676		IDI2						LOC101927497	KCNMB3	DDX6												ADAMTS17	PLXNA4			C7orf72	ENTPD2		TESK1	RNF8					EFCAB2
								KIAA0196						MIR8073		TUBB8						LOC105375396	ZNF639	DPAGT1												DNM1P46	CPA5				CDK9		TLN1	STK38					COX20
								HHLA1						LINC00399		LINC00200							PEX5L	ETS1												FAM169B	CEP41				CEL		TPM2	CMTR1					PLD5
								TRIB1						LINC00396		PRR26							MFN1	SLC37A4												LOC400464	TSGA13				CELP		VCP	MTCH1					C1orf100
								RNF139								MIR5699							MRPL47	GRIK4												MIR4714	KLF14				COL5A1		RECK	BRPF3					C1orf101
								ZHX1								LOC101927762							GNB4	H2AFX												IRAIN	FLJ40288				CRAT		RGP1	ETV7					LOC339529
								ZHX2								MIR7641-2							ZMAT3	HMBS												LUNAR1	MESTIT1				DBH		MELK	PPIL1					MAP1LC3C
								EFR3A								LOC102723376							DNAJC19	HSPA8													LINC-PINT				SARDH		RUSC2	TBC1D22B					BECN2
								ATAD2															TTC14	IL10RA													MIR29A				DNM1		GNE	CPNE5					LINC01347
								ASAP1-IT1															CCDC39	STT3A													MIR29B1				TOR1A		CREB3	ZFAND3					MIR4677
								ASAP1															SOX2-OT	VWA5A													MIR335				ENDOG		UNC13B	SLC26A8					LOC101928068
								FAM49B															LOC100505609	MCAM													LOC100506860				ENG		PHF24	CCDC167					SNORA100
								TRMT12															LINC01014	KMT2A													MKLN1-AS				FCN1		DNAJB5	TMEM217
								WDYHV1															LINC01206	NRGN													LOC101928782				FCN2		SPAG8	FGD2
								GSDMC															LOC101928739	NECTIN1													LOC101928807				FPGS		SIT1	PI16
								DERL1															PEX5L-AS2	RPS25													LOC105375504				NR5A1		STOML2	C6orf89
								TATDN1															LOC101928882	SC5D																	FUT7		TMEM8B	ARMC12
								C8orf76															RNU6-7	SCN2B																	NR6A1		OR2S2	KCTD20
								FAM83A															LOC102724604	SCN4B																	GLE1		GBA2	PXT1
								TBC1D31															RNU6-2	ST3GAL4																	GOLGA1		FAM214B	LHFPL5
								FBXO32															KCNMB2-AS1	SORL1																	GOLGA2		HINT2	MDGA1
								CCDC26																SRPRA																	GPR21		PIGO	LOC285847
								ZNF572																TECTA																	RAPGEF1		ARHGEF39	PNPLA1
								FER1L6-AS2																THY1																	GRIN1		LINC00950	CLPSL1
								TMEM65																UPK2																	HSPA5		C9orf131	CLPSL2
								LINC00964																ZNF202																	LCN1		RNF38	C6orf222
								FAM84B																USP2																	LCN2		GLIPR2	RAB44
								FAM91A1																UBE4A																	LMX1B		LINC00961	MIR3925
								NSMCE2																EI24																	NOTCH1		ATP8B5P	LOC100505530
								KLHL38																FEZ1																	ODF2		CCDC107	MIR4462
								FER1L6-AS1																C2CD2L																	PAEP		FAM205BP	PANDAR
								TMEM75																MPZL2																	PBX3		FAM221B
								FER1L6																HYOU1																	PTPA		OR13J1
								MIR548D1																ATP5L																	PPP6C		HRCT1
								CASC8																TREH																	PSMB7		MSMP
								LINC00977																PHLDB1																	PTGDS		FAM166B
								OC90																ARHGEF12																	RALGDS		FAM205C
								LINC00861																VSIG2																	RPL7A		MIR4667
								FAM83A-AS1																TRIM29																	RPL12		MIR4540
								CASC11																POU2F3																	RXRA		MIR4475
								MIR1205																HINFP																	SET		MIR4476
								MIR1206																OR8G2																	SNAPC4		DNAJB5-AS1
								MIR1207																OR8B8																	SPTAN1		LOC101926948
								MIR1204																OR8G1																	STXBP1		MIR6852
								MIR1208																OR8B2																	SURF1		MIR6853
								MIR3686																DCPS																	SURF2
								MIR548AA1																DDX25																	SURF4
								CCAT1																CDON																	MED22
								ASAP1-IT2																TRAPPC4																	SURF6
								ZHX1-C8orf76																SPA17																	TRAF2
								MIR4662A																SIAE																	TSC1
								MIR4662B																ROBO4																	TTF1
								MIR4663																FOXRED1																	VAV2
								PCAT1																SCN3B																	ZNF79
								MIR5194																VPS11																	BRD3
								CCAT2																CRTAM																	NUP214
								PRNCR1																TMPRSS4																	LHX3
								LOC101927588																IFT46																	GFI1B
								RNF139-AS1																GRAMD1B																	SSNA1
								LOC101927657																PKNOX2																	EDF1
								LINC00824																ABCG4																	DPM2
								MIR6844																ROBO3																	FUBP3
								CASC21																RNF26																	CLIC3
								CASC19																FAM118B																	GTF3C5
								PCAT2																NLRX1																	GTF3C4
								LINC01151																MSANTD2																	LHX2
								LOC105375734																CLMP																	MED27
								LOC105375744																PDZD3																	PTGES
																								C11orf63																	RALGPS1
Type	Chromosome	Start	End	#NAME?	G-score	average amplitude	frequency																	CCDC15																	ADAMTSL2
Amp	1	3302046	3619360	0	0.007513	0.525499	0.025641																	PUS3																	PPP1R26
Amp	1	3621937	3659633	0	0.013051	0.602985	0.025641																	KIRREL3																	SEC16A
Amp	1	3662248	3692443	0	0.006586	0.548402	0.023504																	TMEM25																	SH2D3C
Amp	1	3697916	3860818	0	0.001048	0.499236	0.021368																	RPUSD4																	RABEPK
Amp	1	3864478	4049317	0	0.002143	0.475368	0.023504																	TBRG1																	LAMC3
Amp	1	4051681	7967337	0	0.001048	0.499236	0.021368																	UBASH3B																	TUBB4B
Amp	1	7970240	7993684	0	0.001725	0.461856	0.021368																	SNORD14C																	UBAC1
Amp	1	7994229	10343882	0	0.001048	0.499164	0.019231																	SNORD14D																	OLFM1
Amp	1	10344125	10456970	0	0.003687	0.498378	0.021368																	SNORD14E																	ZER1
Amp	1	10463352	11932953	0	0.001048	0.499164	0.019231																	ESAM																	AGPAT2
Amp	1	11943645	12022869	0	0.005341	0.569048	0.021368																	TIRAP																	POMT1
Amp	1	12033527	15551554	0	0.001048	0.538152	0.019231																	C1QTNF5																	NEK6
Amp	1	15553666	15583508	0	0.004242	0.544605	0.021368																	PANX3																	SDCCAG3
Amp	1	15592181	17335501	0	0.001048	0.538152	0.019231																	JAML																	NOXA1
Amp	1	17339190	17464034	0	0.004101	0.474361	0.023504																	TTC36																	USP20
Amp	1	17467709	17570640	0	0.008018	0.495585	0.025641																	PATE1																	SLC27A4
Amp	1	17576803	17613939	0	0.004101	0.474361	0.023504																	MPZL3																	WDR5
Amp	1	17619688	20473721	0	0.001048	0.467644	0.021368																	HYLS1																	SPACA9
Amp	1	20477896	22170210	0	0.003211	0.461822	0.023504																	TMEM218																	ADAMTS13
Amp	1	22187743	22233437	0	0.022859	0.726953	0.025641																	SLC37A2																	CACFD1
Amp	1	22234495	22356912	0	0.020695	0.756348	0.023504																	OR8B12																	SLC2A6
Amp	1	22358262	22815858	0.537554	0.038965	0.978979	0.025641																	OR8G5																	RPL35
Amp	1	22816003	23001322	0.693114	0.042241	0.950575	0.027778																	OR10G8																	MAN1B1
Amp	1	23005076	23154091	0.537554	0.038965	0.978979	0.025641																	OR10G9																	DOLK
Amp	1	23157110	23258657	0.693114	0.042339	0.951986	0.027778																	OR10S1																	FNBP1
Amp	1	23259232	23319835	0.537554	0.038965	0.978979	0.025641																	OR6T1																	SETX
Amp	1	23326452	23337770	0	0.019317	0.735536	0.023504																	OR4D5																	ZBTB43
Amp	1	23338486	23349390	0	0.001048	0.466297	0.021368																	TBCEL																	PMPCA
Amp	1	23352531	23354515	0	0.001811	0.442241	0.023504																	TMEM136																	EXOSC2
Amp	1	23355345	23608442	0	0.002476	0.481874	0.025641																	HEPACAM																	NCS1
Amp	1	23610431	24620695	0	0.001811	0.442241	0.023504																	OAF																	ANGPTL2
Amp	1	24622381	24671779	0	0.006009	0.470502	0.025641																	BCL9L																	NUP188
Amp	1	24673658	24823191	0	0.01033	0.499867	0.027778																	FOXR1																	RABGAP1
Amp	1	24838128	24838128	0	0.006009	0.470502	0.025641																	CCDC153																	CIZ1
Amp	1	24841633	25031720	0	0.001811	0.442241	0.023504																	OR8D1																	NELFB
Amp	1	25032882	27576831	0	0.001048	0.466297	0.021368																	OR8D2																	NSMF
Amp	1	27579514	27712636	0	0	0.519044	0.021368																	OR8B4																	GPSM1
Amp	1	27718078	27944226	0	0.001324	0.496577	0.023504																	KIRREL3-AS3																	DKFZP434A062
Amp	1	27946505	28481394	0	0	0.519044	0.021368																	CCDC84																	GAPVD1
Amp	1	28486031	28658327	0	0.002534	0.524147	0.023504																	TMEM225																	GBGT1
Amp	1	28660875	29528163	0	0	0.528671	0.021368																	OR8D4																	SNORA65
Amp	1	29528228	29535498	0	0.00504	0.566173	0.023504																	LOC341056																	SNORD62A
Amp	1	29537643	30666231	0	0	0.528671	0.021368																	BSX																	SNORD36C
Amp	1	30666733	30793010	0	0.004466	0.556172	0.023504																	OR6X1																	SNORD36B
Amp	1	30794326	31148580	0	0.008698	0.538975	0.027778																	OR6M1																	SNORD36A
Amp	1	31150820	31251897	0	0.007969	0.528537	0.027778																	OR10G4																	SNORD24
Amp	1	31253128	31341598	0	0.010904	0.529805	0.029915																	OR10G7																	TRUB2
Amp	1	31341888	31360640	0	0.007401	0.520401	0.027778																	OR8B3																	ST6GALNAC4
Amp	1	31360859	32477098	0	0.002935	0.494504	0.025641																	OR8A1																	NDOR1
Amp	1	32484401	32514921	0	0	0.489795	0.023504																	MIR100HG																	TOR1B
Amp	1	32516789	32807282	0	0.002975	0.495846	0.025641																	PATE2																	TOR2A
Amp	1	32810699	32934779	0	0.007022	0.519254	0.027778																	PATE4																	NTMT1
Amp	1	32961069	33235049	0	0.002975	0.495846	0.025641																	ST3GAL4-AS1																	PHPT1
Amp	1	33237364	33559430	0	0	0.501648	0.023504																	LOC403312																	ANAPC2
Amp	1	33559565	37873070	0	0.000726	0.471101	0.025641																	MIRLET7A2																	PKN3
Amp	1	37873469	37962648	0	0.001739	0.444568	0.027778																	MIR100																	DPP7
Amp	1	37965753	39062239	0	0.003103	0.433409	0.029915																	MIR125B1																	SLC2A8
Amp	1	39062560	39718250	0	0.001739	0.444568	0.027778																	BLID																	OBP2B
Amp	1	39718400	39843320	0	0.005199	0.459677	0.029915																	HEPN1																	OBP2A
Amp	1	39846274	41015983	0	0.001739	0.444568	0.027778																	LOC649133																	ST6GALNAC6
Amp	1	41018645	41694266	0	0.000726	0.463929	0.025641																	RPL23AP64																	MRPS2
Amp	1	41696581	42543661	0	0.004916	0.486885	0.027778																	LOC100131626																	COQ4
Amp	1	42548776	43216815	0	0.000726	0.466221	0.025641																	PATE3																	LOC51145
Amp	1	43216986	44448941	0	0.002127	0.455095	0.027778																	MIR3167																	CERCAM
Amp	1	44450466	44839820	0	0.004308	0.492437	0.027778																	USP2-AS1																	EGFL7
Amp	1	44844138	44927283	0	0.008414	0.51592	0.029915																	MIR3656																	PRRX2
Amp	1	44927605	45135765	0	0.006232	0.486921	0.029915																	LOC100507283																	SPOUT1
Amp	1	45137856	45654909	0	0.002127	0.46154	0.027778																	TMPRSS4-AS1																	C9orf78
Amp	1	45663380	46129164	0	0.00643	0.485989	0.029915																	MIR4493																	FBXW5
Amp	1	46130011	46574319	0	0.005028	0.461684	0.029915																	MIR4492																	TBC1D13
Amp	1	46578904	47039045	0	0.000726	0.457092	0.029915																	KIRREL3-AS2																	TOR4A
Amp	1	47041486	47059549	0	0.002619	0.472346	0.029915																	LOC101929089																	EXD3
Amp	1	47067958	47522622	0	0.000726	0.481577	0.027778																	LOC101929208																	STRBP
Amp	1	47523900	47564055	0	0.008896	0.569865	0.029915																	LOC101929227																	RABL6
Amp	1	47568042	47749707	0	0.005065	0.525366	0.029915																	LOC101929340																	LRRC8A
Amp	1	47749915	48189542	0	0.000726	0.508582	0.027778																	LOC101929427																	INPP5E
Amp	1	48190879	49435517	0	0	0.539706	0.025641																	LOC101929473																	NPDC1
Amp	1	49435905	52002874	0	0.000566	0.506298	0.027778																	LOC101929497																	BARHL1
Amp	1	52003922	52030606	0	0.004092	0.521555	0.029915																	LOC101929517																	SH3GLB2
Amp	1	52033189	53032844	0	0.000566	0.51054	0.027778																	MIR6756																	REXO4
Amp	1	53033064	53292263	0	0.001231	0.483459	0.029915																	MIR7641-2																	DOLPP1
Amp	1	53297109	53369627	0	0.006456	0.519487	0.032051																	MIR6090																	KCNT1
Amp	1	53373647	54205815	0	0.001231	0.483459	0.029915																	MIR6716																	DENND1A
Amp	1	54211455	54440248	0	0.003248	0.476269	0.032051																	LOC102724301																	GPR107
Amp	1	54441494	55108565	0	0.001231	0.483459	0.029915																	PKNOX2-AS1																	PRDM12
Amp	1	55111282	55278385	0	0.0038	0.467863	0.034188																	LOC105369532																	CARD9
Amp	1	55278756	56704997	0	0.003233	0.487642	0.032051																	STT3A-AS1																	DDX31
Amp	1	56706667	60017388	0	0.000664	0.502833	0.029915																																		FAM129B
Amp	1	60028371	61654909	0	0.001242	0.45973	0.034188																																		MRPL41
Amp	1	61655092	62405412	0	0.000664	0.480888	0.032051																																		C9orf16
Amp	1	62407716	62694022	0	0.002792	0.507286	0.032051																																		MAPKAP1
Amp	1	62695570	62795981	0	0.000664	0.480733	0.032051																																		EHMT1
Amp	1	62800711	62801139	0	0.005456	0.508825	0.034188																																		PTGES2
Amp	1	62806788	63396358	0	0.010009	0.530686	0.036325																																		MIR600HG
Amp	1	63397492	64012052	0	0.000664	0.480733	0.032051																																		URM1
Amp	1	64015748	64608362	0	0.005121	0.484276	0.036325																																		ARPC5L
Amp	1	64608552	65904433	0	0.000664	0.446243	0.034188																																		AIF1L
Amp	1	65905706	65990782	0	0.005371	0.494349	0.034188																																		UCK1
Amp	1	65990922	66120279	0	0.000664	0.468634	0.032051																																		GARNL3
Amp	1	66121077	66503401	0	0.001368	0.454374	0.034188																																		NTNG2
Amp	1	66508531	66739644	0	0.000664	0.446188	0.034188																																		PRRC2B
Amp	1	66740629	67190271	0	0.004695	0.46491	0.036325																																		PLPP7
Amp	1	67190824	67802353	0	0.000664	0.446188	0.034188																																		ZDHHC12
Amp	1	67805153	68215516	0	0.004024	0.45847	0.036325																																		MIGA2
Amp	1	68216428	69625816	0	0.000664	0.450923	0.034188																																		FIBCD1
Amp	1	69626357	72274390	0	0.001402	0.475261	0.032051																																		CCDC183
Amp	1	72353207	72542484	0	0.003335	0.464565	0.034188																																		SNHG7
Amp	1	72631417	74182724	0	0.001402	0.470528	0.032051																																		TMEM141
Amp	1	74182799	74194782	0	0.009367	0.531022	0.034188																																		ARRDC1-AS1
Amp	1	74198493	74803600	0	0.001402	0.464907	0.032051																																		MVB12B
Amp	1	74805388	74847955	0.622603	0.040644	0.84043	0.036325																																		WDR34
Amp	1	74850804	74954077	0	0.001402	0.464907	0.032051																																		SAPCD2
Amp	1	74955556	75209173	0	0.00261	0.452069	0.034188																																		C9orf69
Amp	1	75211529	75283247	0	0.00675	0.470908	0.036325																																		LRSAM1
Amp	1	75292481	75302779	0	0.010557	0.492625	0.038462																																		UAP1L1
Amp	1	75308993	75766277	0	0.006417	0.476172	0.036325																																		ARRDC1
Amp	1	75770113	75772225	0	0.005208	0.484055	0.034188																																		DPH7
Amp	1	75772756	76549756	0	0.006236	0.49602	0.034188																																		TMEM203
Amp	1	76549937	77774432	0	0.005208	0.483066	0.034188																																		SLC25A25
Amp	1	77785953	77841729	0	0.006025	0.466352	0.036325																																		ZMYND19
Amp	1	77844691	78254753	0	0.005208	0.483066	0.034188																																		NACC2
Amp	1	78262216	79840897	0	0.00447	0.506007	0.032051																																		C9orf116
Amp	1	79841926	79937482	0	0.007566	0.493747	0.036325																																		LCN8
Amp	1	79938289	79964497	0	0.00447	0.486804	0.034188																																		FAM69B
Amp	1	79970631	80119801	0	0.005532	0.471821	0.036325																																		PTRH1
Amp	1	80122679	80129367	0	0.012233	0.487929	0.040598																																		PIP5KL1
Amp	1	80130590	80685122	0	0.005532	0.471821	0.036325																																		DBH-AS1
Amp	1	80685164	82015023	0	0.00447	0.486804	0.034188																																		ASB6
Amp	1	82018906	82214128	0	0.008153	0.487646	0.038462																																		SLC34A3
Amp	1	82214646	82351766	0	0.00447	0.472509	0.036325																																		CAMSAP1
Amp	1	82352560	83131657	0	0.008655	0.495884	0.038462																																		C9orf62
Amp	1	83136020	84935523	0	0.007858	0.535223	0.034188																																		C9orf163
Amp	1	84937314	88952363	0	0.007194	0.556219	0.032051																																		MAMDC4
Amp	1	88954390	90844492	0	0.010553	0.591093	0.032051																																		LCN6
Amp	1	90846355	91803510	0	0.007194	0.606058	0.032051																																		AK8
Amp	1	91803529	92142767	0	0.010409	0.606118	0.034188																																		TTC16
Amp	1	92146450	95200088	0	0.007194	0.606058	0.032051																																		STKLD1
Amp	1	95201265	95340720	0	0.007883	0.582203	0.034188																																		OLFML2A
Amp	1	95343994	96350207	0	0.009245	0.562862	0.036325																																		QSOX2
Amp	1	96351662	96825511	0	0.007883	0.617326	0.032051																																		NAIF1
Amp	1	96827532	97737689	0	0.01061	0.610805	0.034188																																		PHYHD1
Amp	1	97737945	99960998	0	0.007883	0.617326	0.032051																																		HMCN2
Amp	1	99961327	101561350	0	0.007194	0.588538	0.032051																																		LINC00094
Amp	1	101563767	101764243	0	0.007741	0.606662	0.032051																																		CRB2
Amp	1	101765268	101850903	0	0.010493	0.644104	0.032051																																		SCAI
Amp	1	101851685	105747239	0	0.007741	0.60919	0.032051																																		CFAP157
Amp	1	105749770	105778334	0	0.004354	0.596334	0.029915																																		LCN12
Amp	1	105778367	106802542	0	0.006971	0.593883	0.032051																																		C9orf142
Amp	1	106807840	106859534	0	0.006424	0.582951	0.032051																																		TPRN
Amp	1	106860013	106920220	0	0.008655	0.612113	0.032051																																		FAM78A
Amp	1	106924108	108176950	0	0.006424	0.578249	0.032051																																		QRFP
Amp	1	108328497	108471686	0	0.00805	0.572716	0.034188																																		GLT6D1
Amp	1	108479495	108707526	0	0.006424	0.585011	0.032051																																		SWI5
Amp	1	108709758	109028555	0	0.008728	0.607559	0.032051																																		C9orf50
Amp	1	109067737	109069836	0	0.017382	0.67485	0.034188																																		PNPLA7
Amp	1	109072326	109787246	0	0.015078	0.646828	0.034188																																		CYSRT1
Amp	1	109788380	109814156	0	0.011272	0.602554	0.034188																																		ENTPD8
Amp	1	109818926	109954422	0	0.002618	0.534756	0.032051																																		PTGES2-AS1
Amp	1	109956533	109983008	0	0.006849	0.551889	0.034188																																		IER5L
Amp	1	109983974	110103661	0	0.002618	0.534756	0.032051																																		CFAP77
Amp	1	110104236	111450602	0	0.001599	0.522119	0.032051																																		LCN15
Amp	1	111457376	112691660	0	0	0.532983	0.029915																																		C9orf172
Amp	1	112704008	112767796	0	0.003828	0.55191	0.032051																																		LRRC26
Amp	1	112771988	119276300	0	0	0.522978	0.029915																																		TMEM8C
Amp	1	119277260	119727328	0	0.001036	0.533378	0.027778																																		LCN9
Amp	1	119727368	119808199	0	0.001802	0.517726	0.029915																																		FAM102A
Amp	1	119809173	119855157	0	0.000766	0.500471	0.029915																																		CCDC187
Amp	1	119855237	119984738	0	0.001379	0.475012	0.032051																																		WDR38
Amp	1	119984772	119984772	0	0.001956	0.3957	0.057692																																		LOC401554
Amp	1	146716041	149976135	0	0.007297	0.398549	0.076923																																		LOC401557
Amp	1	149984051	150058787	0	0.00829	0.372091	0.08547																																		LINC01451
Amp	1	150061347	150687555	0	0.007712	0.369406	0.08547																																		LCNL1
Amp	1	150687778	150768248	0	0.011918	0.376777	0.089744																																		C9orf139
Amp	1	150768299	150798513	0.087213	0.027535	0.43589	0.09188																																		FAM166A
Amp	1	150802958	150950427	0	0.011918	0.376777	0.089744																																		SOHLH1
Amp	1	150950623	151237523	0	0.012784	0.371815	0.09188																																		ZBTB34
Amp	1	151251844	151437026	0	0.0157	0.377573	0.094017																																		MIR126
Amp	1	151437367	151507898	0	0.011495	0.373549	0.089744																																		MIR181A2
Amp	1	151507975	151611325	0	0.008578	0.369241	0.087607																																		MIR181B2
Amp	1	151613299	154260540	0	0.007712	0.367727	0.087607																																		MIR199B
Amp	1	154262388	154295108	0	0.014215	0.358671	0.100427																																		MIR219A2
Amp	1	154297709	154745041	0	0.016168	0.360338	0.102564																																		COL5A1-AS1
Amp	1	154745256	154754091	0	0.020745	0.37237	0.104701																																		C9orf106
Amp	1	154758625	154856543	0.02295	0.025268	0.381758	0.106838																																		LCN10
Amp	1	154856627	155036782	0.040537	0.02587	0.378275	0.108974																																		STPG3
Amp	1	155040385	155123250	0	0.021347	0.369004	0.106838																																		NRARP
Amp	1	155125528	155140628	0	0.023254	0.376105	0.106838																																		NRON
Amp	1	155146632	155210675	0.073993	0.02705	0.383663	0.108974																																		FAM163B
Amp	1	155241876	155261512	0.277028	0.033096	0.405729	0.108974																																		EHMT1-IT1
Amp	1	155262283	155269959	0.337963	0.034766	0.403904	0.111111																																		TUBBP5
Amp	1	155270312	155330989	0.225012	0.031908	0.393673	0.111111																																		RNF224
Amp	1	155333027	155422683	0.307772	0.033851	0.393215	0.113248																																		SNORA17A
Amp	1	155424706	155812339	0.083606	0.027366	0.377025	0.111111																																		SNORA17B
Amp	1	155813579	155896610	0.190675	0.030757	0.382944	0.113248																																		MIR600
Amp	1	155897591	155985255	0.378904	0.035566	0.393029	0.115385																																		MIR601
Amp	1	155988209	156078520	0.139453	0.029063	0.377509	0.113248																																		MIR602
Amp	1	156085218	156094089	0.388767	0.035743	0.393639	0.115385																																		RNF208
Amp	1	156095974	156203409	1.4436	0.05539	0.45297	0.117521																																		DNLZ
Amp	1	156205483	156254231	1.52819	0.056836	0.457863	0.117521																																		LOC100128593
Amp	1	156254513	156278161	1.72737	0.059719	0.459987	0.119658																																		LOC100129034
Amp	1	156291463	156379643	1.80946	0.061166	0.456643	0.121795																																		STPG3-AS1
Amp	1	156379982	156429151	1.74547	0.060174	0.469057	0.117521																																		LOC100130548
Amp	1	156441358	156473939	2.22304	0.067226	0.49158	0.117521																																		LINC01502
Amp	1	156476088	156513264	2.07958	0.065272	0.49256	0.115385																																		CCDC183-AS1
Amp	1	156521187	156620904	1.89306	0.06239	0.49097	0.113248																																		FAM157B
Amp	1	156622710	156770863	1.59607	0.057844	0.481686	0.111111																																		LOC100133077
Amp	1	156780361	156827189	1.05646	0.049415	0.459287	0.108974																																		RNU6ATAC
Amp	1	156831013	156839189	0.971563	0.047745	0.462257	0.106838																																		LOC100272217
Amp	1	156840098	156882063	0.809495	0.044354	0.457594	0.104701																																		SLC25A25-AS1
Amp	1	156882697	156915847	0.672444	0.041848	0.456819	0.102564																																		MAN1B1-AS1
Amp	1	156916588	157042783	0.579062	0.039905	0.45868	0.100427																																		MIR1268A
Amp	1	157054500	157087905	0.277028	0.033226	0.455675	0.094017																																		MIR181A2HG
Amp	1	157088632	157169179	0.107782	0.028417	0.454741	0.089744																																		MIR4292
Amp	1	157198281	157356494	0	0.008769	0.391869	0.083333																																		MIR3154
Amp	1	157357214	157436621	0	0.007322	0.410434	0.076923																																		MIR2861
Amp	1	157438173	157535368	0	0.010501	0.421373	0.07906																																		MIR3621
Amp	1	157538148	157701026	0	0.007322	0.40538	0.07906																																		MIR3689A
Amp	1	157702447	157733797	0	0.010408	0.417925	0.07906																																		MIR3911
Amp	1	157734205	158545295	0	0.007322	0.410425	0.076923																																		MIR3689B
Amp	1	158580102	158877078	0	0.008562	0.416838	0.076923																																		LOC100505588
Amp	1	158879261	158919634	0	0.012357	0.426248	0.07906																																		TMEM210
Amp	1	158930485	159178511	0	0.008562	0.416838	0.076923																																		LOC100506100
Amp	1	159183347	159612408	0	0.009197	0.417469	0.076923																																		LINC01503
Amp	1	159612614	159859745	0	0.007957	0.410385	0.076923																																		LINC00963
Amp	1	159863125	159926692	0	0.015593	0.438419	0.07906																																		PPP1R26-AS1
Amp	1	159934230	160035807	0	0.022128	0.458882	0.081197																																		MIR3689D1
Amp	1	160036052	160223267	0	0.021526	0.466421	0.07906																																		MIR3689F
Amp	1	160224560	160373154	0	0.01389	0.427593	0.07906																																		MIR4669
Amp	1	160379411	162052604	0	0.007355	0.397523	0.07906																																		MIR4673
Amp	1	162053949	162092778	0	0.008075	0.419593	0.074786																																		MIR3960
Amp	1	162092806	162135262	0	0.009742	0.426328	0.074786																																		MIR4674
Amp	1	162135304	162550733	0	0.007355	0.425672	0.07265																																		MIR3689C
Amp	1	162552026	162606919	0	0.010474	0.430282	0.074786																																		MIR219B
Amp	1	162609083	162803724	0	0.007355	0.424094	0.07265																																		MIR3689D2
Amp	1	162811997	162850389	0	0.00911	0.43852	0.07265																																		MIR4672
Amp	1	162852046	162866801	0	0.012668	0.446632	0.074786																																		MIR3689E
Amp	1	162867060	163295539	0	0.00911	0.447697	0.070513																																		MIR4479
Amp	1	163306262	163396894	0	0.013117	0.457217	0.07265																																		MIR548AW
Amp	1	163399501	163477540	0	0.00911	0.458444	0.068376																																		LOC101448202
Amp	1	163477654	163496730	0	0.012974	0.467121	0.070513																																		NALT1
Amp	1	163502316	164042303	0	0.00911	0.458444	0.068376																																		LOC101928525
Amp	1	164042595	164190266	0	0.008344	0.468593	0.066239																																		HSPC324
Amp	1	164190573	164238486	0	0.01069	0.468311	0.068376																																		LOC101928786
Amp	1	164238502	164352563	0	0.008344	0.468593	0.066239																																		LOC101928932
Amp	1	164359134	164366996	0	0.01162	0.473719	0.068376																																		LOC101929116
Amp	1	164369190	164988823	0	0.008344	0.468593	0.066239																																		LOC101929331
Amp	1	164988886	165011571	0	0.011456	0.472812	0.068376																																		PRRX2-AS1
Amp	1	165011593	165150174	0	0.008344	0.468593	0.066239																																		MIR6722
Amp	1	165151396	165166700	0	0.012081	0.476449	0.068376																																		MIR6856
Amp	1	165167320	165200327	0	0.008344	0.468593	0.066239																																		MIR6877
Amp	1	165201117	165371647	0	0.007709	0.463304	0.066239																																		MIR7150
Amp	1	165371716	165469537	0	0.005954	0.446049	0.066239																																		MIR7114
Amp	1	165469675	165557556	0	0.005091	0.435751	0.066239																																		MIR6855
Amp	1	165562102	165575464	0	0.009385	0.447442	0.068376																																		LOC102723566
Amp	1	165580772	165661012	0	0.005091	0.435751	0.066239																																		LOC105376271
Amp	1	165670027	165685614	0	0.009426	0.448071	0.068376																																		LOC105376306
Amp	1	165685632	166234844	0	0.005091	0.435751	0.066239																																		LOC105376331
Amp	1	166237236	166423066	0	0.007996	0.443964	0.068376																																		SNORD141A
Amp	1	166423913	166596578	0	0.005091	0.428751	0.068376
Amp	1	166597148	166865993	0	0.010916	0.451749	0.070513
Amp	1	166868638	167599204	0	0.008884	0.453741	0.068376
Amp	1	167599785	167604835	0	0.00541	0.433534	0.068376
Amp	1	167609684	167884165	0	0.003058	0.43207	0.066239
Amp	1	167893308	167913161	0	0.005857	0.43631	0.068376
Amp	1	167916174	168816062	0	0.003058	0.43207	0.066239
Amp	1	168818069	168830350	0	0.003819	0.43372	0.066239
Amp	1	168830661	168934620	0	0.007019	0.439845	0.068376
Amp	1	168940714	169220533	0	0.003819	0.43372	0.066239
Amp	1	169220569	169376956	0	0.007867	0.446995	0.068376
Amp	1	169378307	169456680	0	0.003819	0.447252	0.064103
Amp	1	169464035	169479460	0	0.008311	0.460132	0.066239
Amp	1	169482852	169735179	0	0.003819	0.447252	0.064103
Amp	1	169735194	169926153	0	0.005017	0.440172	0.066239
Amp	1	169926855	169988820	0	0.008285	0.446061	0.068376
Amp	1	169989090	170352157	0	0.005017	0.440172	0.066239
Amp	1	170352315	170838632	0	0.005571	0.431303	0.068376
Amp	1	170839122	170879333	0	0.00481	0.429823	0.068376
Amp	1	170879927	171738390	0	0.006089	0.438608	0.068376
Amp	1	171740240	171850878	0	0.008985	0.443482	0.070513
Amp	1	171853785	171878155	0	0.010749	0.456308	0.070513
Amp	1	171878325	172766354	0	0.007854	0.451835	0.068376
Amp	1	172770991	172910089	0	0.006575	0.444395	0.068376
Amp	1	172910738	172946563	0	0.010796	0.456569	0.070513
Amp	1	172952732	174521537	0	0.006575	0.444395	0.068376
Amp	1	174522163	174560261	0	0.009786	0.449983	0.070513
Amp	1	174562714	174664167	0	0.006575	0.444395	0.068376
Amp	1	174666589	175256315	0	0.013822	0.471967	0.070513
Amp	1	175265244	175295129	0	0.01788	0.486473	0.07265
Amp	1	175298245	175455650	0	0.013822	0.476254	0.070513
Amp	1	175455723	175923461	0	0.012624	0.484019	0.068376
Amp	1	175923956	176119126	0	0.011773	0.490478	0.066239
Amp	1	176123993	176382903	0	0.004526	0.461685	0.064103
Amp	1	176384102	176561908	0	0.005774	0.454284	0.066239
Amp	1	176562630	176682830	0	0.00522	0.463725	0.064103
Amp	1	176685983	177007680	0	0.005959	0.453243	0.066239
Amp	1	177009329	177032020	0	0.009211	0.459882	0.068376
Amp	1	177034102	177240618	0	0.005959	0.452981	0.066239
Amp	1	177244729	177287377	0	0.008104	0.451976	0.068376
Amp	1	177287747	177307444	0	0.0092	0.445567	0.070513
Amp	1	177313907	177386284	0	0.011706	0.459698	0.070513
Amp	1	177386426	177479081	0	0.008104	0.451976	0.068376
Amp	1	177483412	177494202	0	0.011334	0.457655	0.070513
Amp	1	177495875	177579910	0	0.009188	0.458806	0.068376
Amp	1	177582058	177641825	0	0.005959	0.452981	0.066239
Amp	1	177641969	178282509	0	0.004711	0.460338	0.064103
Amp	1	178282545	178307749	0	0.007823	0.475336	0.064103
Amp	1	178321672	178389942	0	0.004711	0.470427	0.061966
Amp	1	178396524	178533837	0	0.006403	0.481286	0.061966
Amp	1	178534483	178567384	0	0.010137	0.484508	0.064103
Amp	1	178573814	179058246	0	0.006403	0.476258	0.061966
Amp	1	179065094	179100593	0	0.009143	0.478697	0.064103
Amp	1	179101106	179801145	0	0.006403	0.476627	0.061966
Amp	1	179802530	179911869	0	0.009865	0.483571	0.064103
Amp	1	179917990	180070002	0	0.006403	0.476627	0.061966
Amp	1	180072259	180875604	0	0.010388	0.485986	0.064103
Amp	1	180876180	181239163	0	0.011353	0.476809	0.066239
Amp	1	181240035	181318157	0	0.014652	0.483594	0.068376
Amp	1	181318358	181448334	0	0.011353	0.476809	0.066239
Amp	1	181448676	181486971	0	0.009661	0.465869	0.066239
Amp	1	181487397	182306790	0	0.008696	0.474681	0.064103
Amp	1	182310192	182358684	0	0.011947	0.479779	0.066239
Amp	1	182360584	182625374	0	0.008696	0.474593	0.064103
Amp	1	182627511	182683907	0	0.012444	0.482133	0.066239
Amp	1	182689739	183015462	0	0.008696	0.496218	0.064103
Amp	1	183017926	183151176	0	0.009236	0.485647	0.066239
Amp	1	183154406	183213480	0	0.013328	0.494732	0.068376
Amp	1	183215713	183347755	0	0.009236	0.485647	0.066239
Amp	1	183349279	183440136	0	0.012298	0.488614	0.068376
Amp	1	183440514	183633925	0	0.009236	0.485647	0.066239
Amp	1	183634040	183664396	0	0.013385	0.498566	0.068376
Amp	1	183667911	183965815	0	0.009236	0.488065	0.066239
Amp	1	183967263	184668969	0	0.008497	0.499707	0.064103
Amp	1	184676723	184677059	0	0.013274	0.512759	0.066239
Amp	1	184680669	184714357	0	0.009289	0.504605	0.064103
Amp	1	184719478	185127119	0	0.004512	0.490821	0.061966
Amp	1	185164934	185949625	0	0.011583	0.514216	0.064103
Amp	1	185954443	186025355	0	0.014986	0.522838	0.066239
Amp	1	186027181	186247531	0	0.011583	0.517422	0.064103
Amp	1	186247620	186272606	0	0.016734	0.532117	0.066239
Amp	1	186273026	186502169	0	0.011583	0.517422	0.064103
Amp	1	186506777	186553623	0	0.015059	0.52291	0.066239
Amp	1	186561845	186585908	0	0.011583	0.517422	0.064103
Amp	1	186591846	187994539	0	0.004512	0.489698	0.061966
Amp	1	187994961	188316392	0	0.003899	0.482261	0.064103
Amp	1	188324276	188544625	0	0.007546	0.485261	0.066239
Amp	1	188544769	189677768	0	0.003899	0.478307	0.064103
Amp	1	189677783	189687970	0	0.019844	0.55879	0.066239
Amp	1	189691163	189841042	0	0.003899	0.478307	0.064103
Amp	1	189849814	189861119	0	0.008474	0.490344	0.066239
Amp	1	189866390	190550019	0	0.003899	0.478307	0.064103
Amp	1	190553185	190628340	0	0.007633	0.486609	0.066239
Amp	1	190629276	190754223	0	0.003899	0.478307	0.064103
Amp	1	190756526	190877876	0	0.005789	0.475602	0.066239
Amp	1	190879187	191249629	0	0.003899	0.478307	0.064103
Amp	1	191256369	191532263	0	0.014376	0.543304	0.064103
Amp	1	191532527	192294459	0	0.003359	0.48899	0.061966
Amp	1	192300081	192409849	0	0.006809	0.492629	0.064103
Amp	1	192409892	192698054	0	0.003359	0.485996	0.061966
Amp	1	192698757	192733869	0	0.007296	0.49526	0.064103
Amp	1	192734412	193071023	0	0.003359	0.485996	0.061966
Amp	1	193073118	193109284	0	0.006612	0.478733	0.066239
Amp	1	193113019	193506836	0	0.003359	0.473476	0.064103
Amp	1	193509070	193600430	0	0.006678	0.480112	0.066239
Amp	1	193612990	194168419	0	0.003359	0.473476	0.064103
Amp	1	194169560	195128104	0	0.001765	0.478016	0.061966
Amp	1	195131528	195176370	0	0.002879	0.487726	0.061966
Amp	1	195176509	195594248	0	0.00428	0.482429	0.064103
Amp	1	195594671	197038349	0	0.002879	0.49017	0.061966
Amp	1	197041809	197063913	0	0.006078	0.498954	0.064103
Amp	1	197066408	197084264	0	0.002879	0.493511	0.061966
Amp	1	197085534	197124900	0	0.006178	0.498087	0.064103
Amp	1	197130138	197291124	0	0.002879	0.493511	0.061966
Amp	1	197291469	197374633	0	0.001765	0.486309	0.061966
Amp	1	197374820	197412575	0	0.003483	0.481319	0.064103
Amp	1	197419110	198506044	0	0.001765	0.486309	0.061966
Amp	1	198506058	198552984	0	0.005189	0.490469	0.064103
Amp	1	198561516	198973886	0	0.001765	0.482437	0.061966
Amp	1	198976404	199055444	0	0.006021	0.495068	0.064103
Amp	1	199057638	199146749	0	0.001765	0.482437	0.061966
Amp	1	199147429	199285277	0	0.002372	0.485059	0.061966
Amp	1	199289510	199388362	0	0.005606	0.491259	0.064103
Amp	1	199390031	200388671	0	0.002372	0.482781	0.061966
Amp	1	200388986	200688794	0	0.005124	0.458674	0.066239
Amp	1	200693050	200720587	0	0.008363	0.452345	0.070513
Amp	1	200723025	200978399	0	0.005124	0.44576	0.068376
Amp	1	200981435	201128753	0	0.008162	0.44971	0.070513
Amp	1	201131354	201221068	0	0.005124	0.44576	0.068376
Amp	1	201223756	201409307	0	0.007676	0.447135	0.070513
Amp	1	201410020	201764240	0	0.005124	0.44576	0.068376
Amp	1	201770492	201790221	0	0.008144	0.451322	0.070513
Amp	1	201792820	202105640	0	0.005124	0.440052	0.068376
Amp	1	202108168	202349188	0	0.008982	0.45032	0.070513
Amp	1	202351746	202691052	0	0.010124	0.448989	0.07265
Amp	1	202691087	202791514	0	0.008982	0.456154	0.070513
Amp	1	202791530	202824715	0	0.013019	0.466976	0.07265
Amp	1	202824872	202973458	0	0.008982	0.456154	0.070513
Amp	1	202976278	203163179	0.107782	0.028396	0.550292	0.07265
Amp	1	203164045	203197823	0.285294	0.03349	0.562098	0.074786
Amp	1	203198554	203200464	0.316122	0.034367	0.552426	0.076923
Amp	1	203200743	203212735	0.537554	0.03913	0.562834	0.07906
Amp	1	203212931	203222776	0.307772	0.034036	0.551705	0.076923
Amp	1	203226561	203226561	0.139453	0.029273	0.540681	0.074786
Amp	1	203230586	203240656	1.02674	0.048889	0.627242	0.076923
Amp	1	203242022	203290231	1.29117	0.05304	0.631168	0.07906
Amp	1	203291372	203373491	1.39091	0.054614	0.622322	0.081197
Amp	1	203379543	203401333	1.65111	0.058612	0.627311	0.083333
Amp	1	203402047	203451761	1.46132	0.055688	0.613357	0.083333
Amp	1	203455002	203497711	2.45941	0.071186	0.687314	0.083333
Amp	1	203501529	203587017	2.59991	0.07313	0.696595	0.083333
Amp	1	203589347	203621856	3.91023	0.092728	0.770601	0.08547
Amp	1	203625674	203671637	3.39702	0.085851	0.773962	0.081197
Amp	1	203673518	203935975	4.63354	0.102411	0.85599	0.081197
Amp	1	203937000	203965606	4.9163	0.10655	0.854723	0.083333
Amp	1	203976373	204004652	4.61358	0.102347	0.813799	0.08547
Amp	1	204004764	204063447	4.41283	0.099563	0.800843	0.08547
Amp	1	204063910	204195379	4.31098	0.098209	0.813985	0.083333
Amp	1	204195563	204260924	4.63354	0.102615	0.814249	0.08547
Amp	1	204261176	204275758	4.66991	0.103241	0.798316	0.087607
Amp	1	204280558	204302423	5.9361	0.119841	0.853312	0.089744
Amp	1	204306015	204342465	7.07566	0.133029	0.911754	0.089744
Amp	1	204343302	204343302	8.87592	0.152593	0.975594	0.09188
Amp	1	204345091	204347956	7.64444	0.139405	0.918191	0.09188
Amp	1	204349855	204401728	7.78986	0.140781	0.903142	0.094017
Amp	1	204406257	204433372	8.51698	0.149025	0.938015	0.094017
Amp	1	204434183	204488658	8.44801	0.148148	0.954855	0.09188
Amp	1	204489038	204582702	8.31983	0.146574	0.970565	0.089744
Amp	1	204588738	204643676	7.98643	0.143108	0.953916	0.089744
Amp	1	204645038	204656884	6.24736	0.123543	0.887991	0.087607
Amp	1	204657924	204686279	5.91363	0.119706	0.870574	0.087607
Amp	1	204688307	204724952	5.80185	0.118331	0.885937	0.08547
Amp	1	204730372	204755158	4.57266	0.10173	0.828958	0.083333
Amp	1	204756518	205156592	4.2613	0.097416	0.808369	0.083333
Amp	1	205159830	205168450	2.88594	0.077819	0.733409	0.081197
Amp	1	205169257	205235128	3.09416	0.081267	0.731469	0.083333
Amp	1	205235550	205235550	2.83394	0.076861	0.72902	0.081197
Amp	1	205238525	205240617	2.61923	0.073412	0.730946	0.07906
Amp	1	205243718	205253759	1.33979	0.053764	0.649671	0.076923
Amp	1	205258721	205312127	0.316122	0.034149	0.563751	0.074786
Amp	1	205318675	205580146	0	0.014734	0.472778	0.07265
Amp	1	205582792	205709228	0	0.011983	0.471544	0.070513
Amp	1	205709504	205713981	0	0.011357	0.493428	0.066239
Amp	1	205716224	205772688	0	0.01519	0.50126	0.068376
Amp	1	205776556	205785918	0	0.006205	0.455225	0.068376
Amp	1	205787356	207018728	0	0.002372	0.445909	0.066239
Amp	1	207019832	207474050	0	0.004358	0.460364	0.066239
Amp	1	207476994	207577330	0	0.002372	0.451702	0.066239
Amp	1	207578894	207703232	0	0.001765	0.460725	0.064103
Amp	1	207704273	207837729	0	0.004673	0.481481	0.064103
Amp	1	207839031	208209908	0	0.001765	0.462762	0.064103
Amp	1	208216189	208234158	0	0.006228	0.496986	0.061966
Amp	1	208237019	209110558	0	0.001765	0.483966	0.059829
Amp	1	209111708	209158125	0	0.005532	0.495596	0.061966
Amp	1	209158444	209492515	0	0.001765	0.487764	0.059829
Amp	1	209492941	209764910	0	0.002445	0.475343	0.061966
Amp	1	209767020	209798310	0	0.005393	0.478506	0.064103
Amp	1	209801226	209874273	0	0.002445	0.475343	0.061966
Amp	1	209877449	210739302	0	0.001765	0.487764	0.059829
Amp	1	210739493	210801839	0	0	0.474058	0.059829
Amp	1	210804687	210827526	0	0.003855	0.483867	0.061966
Amp	1	210835005	211398044	0	0	0.479506	0.059829
Amp	1	211398477	211499164	0	0.002071	0.502121	0.057692
Amp	1	211499230	212206399	0	0	0.486215	0.057692
Amp	1	212210584	212232082	0	0.003821	0.496255	0.059829
Amp	1	212234192	212429526	0	0	0.486215	0.057692
Amp	1	212430071	212638905	0	0.003102	0.491476	0.059829
Amp	1	212640748	212707890	0	0	0.488264	0.057692
Amp	1	212712463	212770910	0	0.003775	0.49613	0.059829
Amp	1	212770915	213228934	0	0	0.486475	0.057692
Amp	1	213234315	213260823	0	0.004041	0.485669	0.061966
Amp	1	213261323	213692012	0	0	0.475156	0.059829
Amp	1	213694064	215125857	0	0.000561	0.483699	0.059829
Amp	1	215130211	215682652	0	0.002323	0.48958	0.061966
Amp	1	215692667	215968572	0	0.000561	0.475717	0.061966
Amp	1	215969641	216015547	0	0.004483	0.485119	0.064103
Amp	1	216016792	217576711	0	0.000561	0.475717	0.061966
Amp	1	217576906	217607130	0	0.00412	0.482433	0.064103
Amp	1	217625088	217798783	0	0.000561	0.473863	0.061966
Amp	1	217799323	217805254	0	0.001699	0.48169	0.061966
Amp	1	217805623	217818471	0	0.005296	0.490232	0.064103
Amp	1	217820744	218150947	0	0.001699	0.48169	0.061966
Amp	1	218151265	218188740	0	0.005528	0.490517	0.064103
Amp	1	218192548	218306648	0	0.001699	0.48169	0.061966
Amp	1	218313472	218383703	0	0.005131	0.487343	0.064103
Amp	1	218383977	218726533	0	0.001699	0.48169	0.061966
Amp	1	218727276	218772487	0	0.006607	0.513213	0.061966
Amp	1	218777844	219058127	0	0.001699	0.481715	0.061966
Amp	1	219063528	219091880	0	0.005499	0.490465	0.064103
Amp	1	219092038	219575228	0	0.001699	0.481715	0.061966
Amp	1	219575246	219796554	0	0.001138	0.473425	0.061966
Amp	1	219796725	219854517	0	0	0.466122	0.061966
Amp	1	219858976	219914705	0	0.003921	0.476144	0.064103
Amp	1	219916010	220315614	0	0	0.466122	0.061966
Amp	1	220315630	220349883	0	0.003828	0.486629	0.061966
Amp	1	220353349	220386676	0	0.006788	0.48957	0.064103
Amp	1	220388222	221171881	0	0.003828	0.486629	0.061966
Amp	1	221172624	221272163	0	0.007011	0.479038	0.064103
Amp	1	221282544	222023990	0	0.003828	0.474294	0.061966
Amp	1	222024225	222047359	0	0.008162	0.486083	0.064103
Amp	1	222054276	223745736	0	0.003828	0.474008	0.061966
Amp	1	223745760	223795362	0	0.007103	0.476762	0.064103
Amp	1	223796385	223808758	0	0.003828	0.47116	0.061966
Amp	1	223810324	223888412	0	0.006203	0.472496	0.064103
Amp	1	223897298	224580053	0	0.003828	0.47116	0.061966
Amp	1	224582514	224589118	0	0.008382	0.486016	0.064103
Amp	1	224589448	224602908	0	0.006388	0.473645	0.064103
Amp	1	224605516	224980283	0	0.003828	0.47116	0.061966
Amp	1	224982589	224991032	0	0.008405	0.484983	0.064103
Amp	1	224994585	225349785	0	0.003828	0.47116	0.061966
Amp	1	225355464	225408894	0	0.007387	0.478809	0.064103
Amp	1	225411153	225433715	0	0.008336	0.495929	0.061966
Amp	1	225434562	225695713	0	0.004777	0.488618	0.059829
Amp	1	225698616	225707361	0	0.011052	0.512267	0.061966
Amp	1	225707603	225707603	0	0.014475	0.517701	0.064103
Amp	1	225707701	225749916	0	0.013494	0.511614	0.064103
Amp	1	225757349	225837474	0	0.010071	0.50597	0.061966
Amp	1	225873306	225978729	0	0.007238	0.488784	0.061966
Amp	1	225978796	226334766	0	0.003795	0.482096	0.059829
Amp	1	226335184	227234631	0	0.009983	0.504997	0.061966
Amp	1	227235161	227454418	0	0.003795	0.481903	0.059829
Amp	1	227455360	228309769	0	0.002847	0.475596	0.059829
Amp	1	228312480	228796637	0	0.006649	0.483724	0.061966
Amp	1	228797726	228849339	0	0.002847	0.479063	0.059829
Amp	1	228858519	228967533	0	0.006975	0.489037	0.061966
Amp	1	228967668	230007900	0	0.002847	0.479063	0.059829
Amp	1	230009941	230500087	0	0.003485	0.470093	0.061966
Amp	1	230500893	230515808	0	0.007148	0.48162	0.064103
Amp	1	230516056	230536485	0	0.003485	0.472275	0.061966
Amp	1	230539607	230548526	0	0.007153	0.481652	0.064103
Amp	1	230548783	231033382	0	0.003485	0.472275	0.061966
Amp	1	231034267	231079470	0	0.0065	0.476598	0.064103
Amp	1	231082178	232542865	0	0.003485	0.472275	0.061966
Amp	1	232542935	234127467	0	0.002847	0.451462	0.057692
Amp	1	234128129	234576866	0	0.004189	0.477506	0.057692
Amp	1	234577637	234616842	0	0.002847	0.468122	0.057692
Amp	1	234616860	234853181	0	0.003774	0.474518	0.057692
Amp	1	234854757	234869375	1.4436	0.055528	0.74824	0.064103
Amp	1	234869763	235414979	0	0.003774	0.474518	0.057692
Amp	1	235418790	235869780	0	0.004812	0.452449	0.059829
Amp	1	235869990	235899347	0	0.003774	0.470034	0.055556
Amp	1	235901939	235940625	0	0.007597	0.480486	0.057692
Amp	1	235943125	236462108	0	0.003774	0.470034	0.055556
Amp	1	236465409	236515942	0	0.006843	0.475289	0.057692
Amp	1	236518281	238383392	0	0.003774	0.470034	0.055556
Amp	1	238384626	238423234	0	0.006828	0.480385	0.059829
Amp	1	238426854	238457223	0	0.008546	0.476049	0.061966
Amp	1	238458112	238486457	0	0.006828	0.480385	0.059829
Amp	1	238489372	238502227	0	0.010863	0.490472	0.061966
Amp	1	238505135	238612525	0	0.014551	0.498146	0.064103
Amp	1	238612987	238615306	0	0.010515	0.488672	0.061966
Amp	1	238619759	238949850	0	0.006828	0.480385	0.059829
Amp	1	238951123	239246883	0	0.009026	0.479586	0.061966
Amp	1	239256486	239660745	0	0.005972	0.46917	0.059829
Amp	1	239663359	239739625	0	0.009733	0.477643	0.061966
Amp	1	239741889	240027925	0	0.012625	0.479665	0.064103
Amp	1	240028354	240042757	0.139453	0.029228	0.563873	0.066239
Amp	1	240043312	240234728	0	0.012625	0.479665	0.064103
Amp	1	240239568	240579704	0	0.015428	0.487448	0.066239
Amp	1	240580046	240714901	0	0.012625	0.469579	0.066239
Amp	1	240720064	240750585	0	0.018353	0.49956	0.066239
Amp	1	240751715	240841974	0	0.012625	0.479665	0.064103
Amp	1	240843653	241445103	0	0.008865	0.471553	0.061966
Amp	1	241446458	241523766	0	0.020839	0.527907	0.064103
Amp	1	241523886	241559319	0	0.02315	0.533655	0.066239
Amp	1	241561622	241832601	0	0.011175	0.476423	0.064103
Amp	1	241833743	241905742	0	0.008865	0.46788	0.061966
Amp	1	242024534	242058418	0.116712	0.028512	0.574179	0.064103
Amp	1	242060041	242532567	0.139453	0.029123	0.560504	0.066239
Amp	1	242532888	242625132	0.116712	0.028512	0.574179	0.064103
Amp	1	242625761	242632142	0.141773	0.029523	0.568005	0.064103
Amp	1	242632712	242722445	0.169468	0.030096	0.55425	0.066239
Amp	1	242722891	242868583	0.210626	0.031252	0.539783	0.070513
Amp	1	242873365	243192159	0.169468	0.030096	0.548786	0.068376
Amp	1	243197166	243379505	0.682176	0.041983	0.618669	0.068376
Amp	1	243379891	243444280	0.765832	0.043676	0.609608	0.070513
Amp	1	243445340	243518115	0.893111	0.046014	0.610333	0.07265
Amp	1	243523611	243962424	0.765832	0.043676	0.609608	0.070513
Amp	1	243962452	244062100	0.794265	0.044266	0.600768	0.07265
Amp	1	244063338	244120804	0.765832	0.043693	0.614682	0.070513
Amp	1	244124309	244458948	0.682176	0.041999	0.623902	0.068376
Amp	1	244462758	244860995	0.139453	0.029102	0.56144	0.066239
Amp	1	244866815	245118964	0.266541	0.032879	0.585758	0.066239
Amp	1	245126396	245630363	0.139453	0.029102	0.563084	0.066239
Amp	1	245640375	245930755	0	0.009455	0.459958	0.064103
Amp	1	245941074	246435044	0	0.00797	0.45075	0.064103
Amp	1	246436444	246956292	0	0.011666	0.473678	0.064103
Amp	1	246966839	247543946	0	0.00797	0.450336	0.064103
Amp	1	247544430	247586695	0	0.013257	0.483134	0.064103
Amp	1	247588429	247602365	0	0.014103	0.472627	0.066239
Amp	1	247615586	247650404	0	0.015367	0.465523	0.068376
Amp	2	484222	683118	0.083606	0.027237	0.459165	0.049145
Amp	2	686316	1913957	0.060945	0.026446	0.483532	0.047009
Amp	2	1914588	2684076	0.088405	0.027842	0.496967	0.047009
Amp	2	2684139	2924311	0.050336	0.026255	0.504905	0.044872
Amp	2	2924606	3139421	0.00193	0.024859	0.492532	0.044872
Amp	2	3142265	3712763	0.02295	0.025452	0.475162	0.047009
Amp	2	3713542	4006291	0.00193	0.024859	0.492532	0.044872
Amp	2	4006352	4219410	0	0.020287	0.451877	0.044872
Amp	2	4219428	6037152	0	0.016707	0.420144	0.044872
Amp	2	6037188	6574809	0	0.018178	0.433187	0.044872
Amp	2	6577440	6590093	0.097156	0.028189	0.499888	0.047009
Amp	2	6590660	7089698	0	0.018178	0.433187	0.044872
Amp	2	7096019	7123002	0	0.022536	0.450361	0.047009
Amp	2	7123777	7149628	0	0.0174	0.42456	0.044872
Amp	2	7174497	7427481	0	0.015659	0.40913	0.044872
Amp	2	7427536	7579995	0	0.013042	0.390959	0.044872
Amp	2	7595965	7635670	0	0.021834	0.447718	0.047009
Amp	2	7642646	7760362	0	0.013042	0.390959	0.044872
Amp	2	7763845	7785107	0	0.01762	0.417635	0.047009
Amp	2	7790753	8490719	0	0.013042	0.395167	0.044872
Amp	2	8492457	8994591	0.116712	0.028555	0.508902	0.047009
Amp	2	8996423	9378805	0.060945	0.026433	0.490951	0.047009
Amp	2	9379692	9534040	0	0.021944	0.452966	0.047009
Amp	2	9543074	9592884	0.031807	0.025713	0.465373	0.049145
Amp	2	9594730	9648374	0	0.021944	0.452966	0.047009
Amp	2	9649274	9759974	0	0.013042	0.38977	0.044872
Amp	2	9762773	9783179	0.256	0.03269	0.538274	0.047009
Amp	2	9784258	9810242	0	0.013042	0.38977	0.044872
Amp	2	9813820	9835428	0	0.01814	0.415178	0.047009
Amp	2	9849853	10311039	0	0.013042	0.38977	0.044872
Amp	2	10322110	10490235	0.012441	0.0252	0.474909	0.047009
Amp	2	10490861	10612842	0	0.013042	0.38977	0.044872
Amp	2	10617415	10689290	0	0.016959	0.405313	0.047009
Amp	2	10694314	10893454	0	0.013042	0.38977	0.044872
Amp	2	10895304	10979095	0	0.023875	0.463702	0.047009
Amp	2	10985084	11479254	0.097156	0.028152	0.499881	0.047009
Amp	2	11483417	11848711	0.233296	0.032229	0.512776	0.049145
Amp	2	11851467	11882677	0	0.01712	0.408256	0.047009
Amp	2	11897053	11905331	0	0.017851	0.396973	0.049145
Amp	2	11905414	12636270	0	0.01712	0.408256	0.047009
Amp	2	12636593	12647787	0	0.013042	0.379648	0.047009
Amp	2	12647842	12655474	0.256	0.032596	0.522135	0.049145
Amp	2	12663419	12803167	0	0.013042	0.379648	0.047009
Amp	2	12808601	12920178	0.065311	0.026798	0.474456	0.049145
Amp	2	12920955	13198041	0.088405	0.027792	0.462665	0.051282
Amp	2	13198065	13559362	0.198658	0.031117	0.488449	0.051282
Amp	2	13566954	13878863	0.225012	0.031892	0.462048	0.055556
Amp	2	13880317	14160923	0	0.018136	0.378121	0.053419
Amp	2	14163304	14182276	0	0.019295	0.373836	0.055556
Amp	2	14184719	14337880	0	0.018136	0.378121	0.053419
Amp	2	14345032	14835631	0	0.020893	0.406436	0.051282
Amp	2	14836108	14868947	0	0.021953	0.412485	0.051282
Amp	2	14930968	14954468	0	0.020893	0.419626	0.049145
Amp	2	14957194	15062335	0	0.021719	0.410674	0.051282
Amp	2	15063036	15078028	0.00193	0.024893	0.435287	0.051282
Amp	2	15081370	15171830	0	0.020893	0.419626	0.049145
Amp	2	15173217	15185071	0.000135	0.024593	0.43421	0.051282
Amp	2	15186247	15246940	0.02295	0.025326	0.424343	0.053419
Amp	2	15253192	15355811	0.000135	0.024593	0.441186	0.051282
Amp	2	15357508	15624960	0.040537	0.025854	0.45096	0.051282
Amp	2	15630977	15702711	0.551661	0.039412	0.556108	0.051282
Amp	2	15703414	15746230	0.592726	0.040106	0.561486	0.051282
Amp	2	15746716	15870535	1.72737	0.059754	0.685301	0.053419
Amp	2	15874953	15874979	1.98717	0.063911	0.6887	0.055556
Amp	2	15875786	15879995	2.20443	0.067128	0.685374	0.057692
Amp	2	15887410	15917923	2.26823	0.068037	0.666938	0.059829
Amp	2	15920237	15931927	2.45941	0.071186	0.645376	0.064103
Amp	2	15932414	16086758	2.7166	0.075207	0.689957	0.061966
Amp	2	16088910	16110149	2.76475	0.075908	0.673007	0.064103
Amp	2	16177242	16191096	0.836893	0.044864	0.533794	0.057692
Amp	2	16194574	16239759	0.70846	0.042592	0.518131	0.057692
Amp	2	16240658	16282959	0.551661	0.039443	0.515515	0.055556
Amp	2	16286318	16333738	0.530615	0.038743	0.528877	0.053419
Amp	2	16337878	16385667	0.565052	0.039508	0.514383	0.055556
Amp	2	16387850	16397295	0.622603	0.040681	0.505309	0.057692
Amp	2	16397683	16433549	0.294239	0.033791	0.475425	0.055556
Amp	2	16434525	16593537	0.256	0.032618	0.483667	0.053419
Amp	2	16603604	16615946	0.307772	0.033862	0.475929	0.055556
Amp	2	16617195	16693066	0.256	0.032618	0.483667	0.053419
Amp	2	16703907	17003311	0	0.016751	0.365539	0.053419
Amp	2	17005186	17402731	0	0.015678	0.369072	0.051282
Amp	2	17411898	17980802	0	0.014769	0.381632	0.049145
Amp	2	18018868	18264582	0	0.015647	0.372088	0.051282
Amp	2	18264923	19451219	0	0.014872	0.371476	0.049145
Amp	2	19451371	19660778	0	0.01574	0.364085	0.051282
Amp	2	19661430	19829924	0	0.014863	0.372814	0.049145
Amp	2	19833992	20236984	0	0.018049	0.381987	0.051282
Amp	2	20237864	20376230	0	0.017054	0.399121	0.049145
Amp	2	20376254	20455188	0	0.017637	0.391808	0.051282
Amp	2	20464944	20465008	0	0.023366	0.419846	0.053419
Amp	2	20465308	20503590	0	0.022028	0.423491	0.051282
Amp	2	20509854	20592489	0.050336	0.02609	0.438355	0.053419
Amp	2	20596185	20634405	0	0.022028	0.423491	0.051282
Amp	2	20636959	20854155	0	0.016299	0.394392	0.049145
Amp	2	20854362	21081560	0	0.015717	0.389679	0.049145
Amp	2	21088204	21423246	0	0.010744	0.364907	0.047009
Amp	2	21428528	21484907	0	0.022445	0.46235	0.047009
Amp	2	21486130	21674690	0	0.01926	0.45613	0.044872
Amp	2	21675732	22032048	0	0.007558	0.365989	0.042735
Amp	2	22033134	22286042	0	0.008625	0.358015	0.044872
Amp	2	22289114	23332279	0	0.007756	0.366211	0.042735
Amp	2	23332486	23938061	0	0.006689	0.375036	0.040598
Amp	2	23943791	24790758	0	0.00898	0.345902	0.040598
Amp	2	24794839	25271605	0	0.006689	0.328571	0.040598
Amp	2	25275687	25275687	0	0.010264	0.349165	0.042735
Amp	2	25276318	25774401	0	0.006271	0.328202	0.040598
Amp	2	25776194	25776194	0	0.011597	0.359844	0.042735
Amp	2	25780199	25798976	0	0.016897	0.389886	0.044872
Amp	2	25813167	25813167	0	0.011597	0.359844	0.042735
Amp	2	25819166	26496744	0	0.006271	0.326224	0.040598
Amp	2	26500859	27147187	0	0.002696	0.305299	0.038462
Amp	2	27155432	27412715	0	0.006519	0.326679	0.040598
Amp	2	27425250	27506999	0	0.010215	0.3473	0.042735
Amp	2	27514389	29857952	0	0.006392	0.328131	0.040598
Amp	2	29860870	29886383	0	0.018322	0.479458	0.038462
Amp	2	29890776	30189557	0	0.006392	0.374852	0.036325
Amp	2	30197827	30704146	0	0.006935	0.35964	0.038462
Amp	2	30705290	31134354	0	0.006392	0.374852	0.036325
Amp	2	31134390	32402929	0	0.005627	0.388778	0.034188
Amp	2	33108804	33304365	0	0.006171	0.365219	0.036325
Amp	2	33311805	33960694	0	0.005627	0.381721	0.034188
Amp	2	33969596	34036781	0	0.013386	0.479629	0.034188
Amp	2	34039034	34592628	0	0.005627	0.389371	0.034188
Amp	2	34592704	34775379	0	0.006241	0.374204	0.036325
Amp	2	34809665	35212187	0	0.004311	0.372373	0.034188
Amp	2	35212539	35590727	0	0.006583	0.377947	0.036325
Amp	2	35866763	35973447	0	0.004311	0.372373	0.034188
Amp	2	35974764	37103541	0	0.003696	0.388429	0.032051
Amp	2	37105917	37137709	0	0.005494	0.378097	0.034188
Amp	2	37138497	38114326	0	0.007375	0.407411	0.034188
Amp	2	38116987	38721006	0	0.005494	0.385523	0.034188
Amp	2	38727277	38928348	0	0.006369	0.370533	0.036325
Amp	2	38937530	39433098	0	0.004571	0.369757	0.034188
Amp	2	39438978	39471896	0	0.008196	0.394436	0.036325
Amp	2	39472029	40028678	0	0.010384	0.395414	0.038462
Amp	2	40030820	40248301	0	0.012475	0.40323	0.040598
Amp	2	40250439	41401861	0	0.009788	0.37691	0.040598
Amp	2	41402191	41568277	0	0.012573	0.398161	0.040598
Amp	2	41569117	41675978	0	0.010386	0.397389	0.038462
Amp	2	41676748	41848389	0	0.0076	0.390272	0.036325
Amp	2	41850428	42123347	0	0.005509	0.389101	0.034188
Amp	2	42123544	42179119	0	0.011062	0.421287	0.036325
Amp	2	42182459	42595728	0	0.005509	0.383021	0.034188
Amp	2	42599012	42988715	0	0.006846	0.398568	0.034188
Amp	2	42995563	43008311	0	0.010432	0.415185	0.036325
Amp	2	43011079	43088179	0	0.013086	0.444246	0.036325
Amp	2	43096255	43098432	0	0.010432	0.394023	0.036325
Amp	2	43098624	44742992	0	0.006846	0.376083	0.034188
Amp	2	44745692	44799790	0	0.015641	0.450342	0.036325
Amp	2	44812912	44927140	0	0.006846	0.376182	0.034188
Amp	2	44936521	45441214	0	0.01065	0.397564	0.036325
Amp	2	45441531	45873545	0	0.006846	0.376182	0.034188
Amp	2	45874723	45921373	0	0.011023	0.399814	0.036325
Amp	2	45921817	46987497	0	0.006846	0.376182	0.034188
Amp	2	46988523	47082964	0	0.011245	0.402216	0.036325
Amp	2	47086485	47218428	0	0.014534	0.413936	0.038462
Amp	2	47219673	47269741	0	0.011245	0.402216	0.036325
Amp	2	47274769	47699952	0	0.01325	0.401706	0.038462
Amp	2	47699998	48317528	0	0.008851	0.377174	0.036325
Amp	2	48323071	48635171	0	0.010791	0.376941	0.038462
Amp	2	48635359	48841557	0	0.008851	0.377174	0.036325
Amp	2	48844331	48876227	0	0.009427	0.393637	0.036325
Amp	2	48878146	49952694	0	0.007422	0.393675	0.034188
Amp	2	49953157	50098168	0	0.009837	0.38821	0.038462
Amp	2	50100924	50160105	0	0.012475	0.397005	0.040598
Amp	2	50160926	50418752	0	0.009837	0.38821	0.038462
Amp	2	50419195	50636524	0	0.007422	0.363241	0.038462
Amp	2	50965967	51130564	1.25529	0.052653	0.683816	0.047009
Amp	2	51133337	51255441	0	0.010755	0.380154	0.040598
Amp	2	51257255	51528593	0	0.007422	0.363241	0.038462
Amp	2	51531137	53292413	0	0.004273	0.350127	0.036325
Amp	2	53292977	53984047	0	0.003696	0.340737	0.036325
Amp	2	53987642	53989913	0	0.004607	0.337561	0.036325
Amp	2	54475237	54538015	0	0.008677	0.360891	0.038462
Amp	2	54538037	54892783	0	0.013346	0.414373	0.038462
Amp	2	54894714	55179243	0	0.012436	0.428781	0.036325
Amp	2	55182619	55522788	0	0.013166	0.412508	0.038462
Amp	2	55524652	55671995	0	0.009096	0.392214	0.036325
Amp	2	55672373	55756794	0	0.004426	0.341093	0.036325
Amp	2	55758481	56470224	0	0.003696	0.353919	0.034188
Amp	2	56532129	56931034	0	0.023344	0.553347	0.036325
Amp	2	56967981	57167460	0	0.004297	0.358441	0.034188
Amp	2	57167750	57264866	0	0.006786	0.358571	0.036325
Amp	2	57271074	57499469	0	0.004297	0.349203	0.034188
Amp	2	57500076	61552695	0	0.003696	0.365037	0.032051
Amp	2	61553902	61705885	0	0.005957	0.354073	0.034188
Amp	2	61710732	61968691	0	0.003696	0.349634	0.032051
Amp	2	62005165	62235078	0	0.018441	0.499302	0.034188
Amp	2	62237348	62396446	0	0.013989	0.447512	0.034188
Amp	2	62396636	64334565	0	0.003696	0.358086	0.032051
Amp	2	64335405	64381659	0	0	0.331996	0.029915
Amp	2	64382351	64926254	0	0.002113	0.336083	0.032051
Amp	2	64928138	64949261	0	0.006823	0.360084	0.034188
Amp	2	64951570	64964070	0	0.002113	0.323697	0.029915
Amp	2	64970565	65050889	0	0.005904	0.352559	0.032051
Amp	2	65060762	65411926	0	0.002113	0.323697	0.029915
Amp	2	65413095	66130772	0	0.005963	0.36778	0.032051
Amp	2	66133329	66198888	0	0.002113	0.336105	0.029915
Amp	2	66199148	68179471	0	0	0.331706	0.027778
Amp	2	68181630	68191603	0	0.004029	0.35536	0.032051
Amp	2	68197304	68321101	0	0.008011	0.38049	0.034188
Amp	2	68322749	68398166	0	0.012046	0.402289	0.036325
Amp	2	68402522	68445589	0	0.008011	0.38049	0.034188
Amp	2	68681018	69071614	0	0	0.326944	0.029915
Amp	2	69076086	69182882	0	0.019648	0.548938	0.032051
Amp	2	69186808	69378376	0	0.012825	0.464275	0.032051
Amp	2	69378420	69559056	0	0	0.326944	0.029915
Amp	2	69559079	70576298	0	0.00062	0.307	0.032051
Amp	2	70577335	73856031	0	0	0.319975	0.029915
Amp	2	73859809	73960576	0	0.002559	0.327014	0.032051
Amp	2	73967066	74927809	0	0	0.314235	0.029915
Amp	2	74928228	74999125	4.03988	0.094481	1.16568	0.040598
Amp	2	74999663	75296346	0	0	0.321037	0.029915
Amp	2	75299363	75593565	0	0.019648	0.54896	0.032051
Amp	2	75692129	76531962	0	0.004241	0.358215	0.032051
Amp	2	76532678	76949923	0	0	0.307643	0.032051
Amp	2	76950202	78002984	0	0.00196	0.311418	0.034188
Amp	2	78003396	81950064	0	0	0.321242	0.029915
Amp	2	81954463	81969821	0	0.004105	0.33169	0.032051
Amp	2	82090732	82173059	0	0.014089	0.432002	0.036325
Amp	2	82177185	83652034	0	0.004105	0.337424	0.032051
Amp	2	83655469	83755773	0	0.023753	0.544888	0.034188
Amp	2	83761345	85233889	0	0.004105	0.337424	0.032051
Amp	2	85237688	85707472	0	0.006041	0.360106	0.032051
Amp	2	85707661	85732978	0	0.004105	0.359678	0.029915
Amp	2	85734723	85793542	0	0.00798	0.38637	0.032051
Amp	2	85794100	85930371	0	0.012865	0.419486	0.034188
Amp	2	85930874	86011774	0	0.018509	0.456805	0.036325
Amp	2	86018961	86055837	0	0.024142	0.493848	0.038462
Amp	2	86057163	86057163	0	0.018509	0.456805	0.036325
Amp	2	86285979	86296317	0	0.012865	0.419486	0.034188
Amp	2	86297684	86299004	0	0.008991	0.396781	0.032051
Amp	2	86305839	86412951	0	0.004105	0.359678	0.029915
Amp	2	86416624	86698090	0	0.006218	0.426841	0.029915
Amp	2	86698257	86707622	0	0.008114	0.422496	0.032051
Amp	2	86751772	86839657	0	0.004009	0.398097	0.029915
Amp	2	86843936	88698748	0	0.002113	0.386672	0.027778
Amp	2	88699958	88831554	0	0	0.33209	0.027778
Amp	2	94675825	95416225	0	0.00948	0.490843	0.025641
Amp	2	95832876	95917059	0.139453	0.029128	0.700473	0.029915
Amp	2	95920385	95986761	0	0.00948	0.473059	0.027778
Amp	2	95994792	95994792	0	0.013642	0.532652	0.027778
Amp	2	95995183	96073600	0	0.015974	0.525605	0.029915
Amp	2	96074526	96186805	0	0.01425	0.50268	0.029915
Amp	2	96191460	96350596	0	0.018709	0.524737	0.032051
Amp	2	96351162	97012582	0	0.01425	0.50268	0.029915
Amp	2	97013433	97796955	0	0.011173	0.468123	0.029915
Amp	2	97799641	98390880	0	0.007216	0.415506	0.029915
Amp	2	98391889	99052929	0	0.00937	0.44415	0.029915
Amp	2	99058234	99368099	0	0.010126	0.4542	0.029915
Amp	2	99370741	99451062	0	0.016501	0.543824	0.029915
Amp	2	99451092	100741600	0	0.010126	0.459076	0.029915
Amp	2	100742752	101317137	0	0.01424	0.479665	0.032051
Amp	2	101321264	101880421	0	0.010126	0.459076	0.029915
Amp	2	101882815	102251986	0	0.00699	0.412512	0.029915
Amp	2	102258848	102278043	0	0.012854	0.490471	0.029915
Amp	2	102278982	102477754	0	0.00699	0.407714	0.029915
Amp	2	102478106	102880183	0	0.012746	0.484231	0.029915
Amp	2	102882320	103218507	0	0.008639	0.429626	0.029915
Amp	2	103221542	103495137	0	0.009251	0.411898	0.032051
Amp	2	103495350	103611544	0	0.012227	0.448827	0.032051
Amp	2	103612841	103680482	0.000135	0.02446	0.56635	0.034188
Amp	2	103682083	103722937	0	0.012227	0.448827	0.032051
Amp	2	103723789	103751556	0	0.019286	0.508432	0.034188
Amp	2	103754157	104520709	0	0.012227	0.45693	0.032051
Amp	2	104525951	104551430	0	0.011615	0.477875	0.029915
Amp	2	104554085	104964041	0.210626	0.031263	0.689807	0.032051
Amp	2	104965547	105132388	0.159346	0.029899	0.712913	0.029915
Amp	2	105133929	105197382	0.210626	0.03139	0.68388	0.032051
Amp	2	105198885	105601914	0	0.011742	0.471525	0.029915
Amp	2	105606380	105654649	0	0.010251	0.486456	0.027778
Amp	2	105654692	105871955	0	0.015865	0.566828	0.027778
Amp	2	105872939	106376553	0	0.016775	0.53844	0.029915
Amp	2	106376788	106765594	0	0.015865	0.566828	0.027778
Amp	2	106768644	107030309	0	0.017119	0.543007	0.029915
Amp	2	107040355	107558613	0	0.015865	0.566828	0.027778
Amp	2	107559305	107668587	0.378904	0.035494	0.787544	0.029915
Amp	2	107671120	109584008	0	0.015865	0.566828	0.027778
Amp	2	109589434	109704919	0	0.016864	0.539616	0.029915
Amp	2	110640222	110944403	0	0.001583	0.330541	0.029915
Amp	2	110944917	111210015	0	0.002833	0.358019	0.029915
Amp	2	111214711	111214711	0	0.001834	0.371262	0.027778
Amp	2	111215173	112069597	0	0.005397	0.422276	0.027778
Amp	2	112069709	112251361	0	0.006222	0.403079	0.029915
Amp	2	112251444	112766390	0	0.004197	0.376147	0.029915
Amp	2	112771606	113024752	0	0.003372	0.393272	0.027778
Amp	2	113024815	113086898	0	0.004555	0.383548	0.029915
Amp	2	113087154	113317691	0	0.006204	0.405478	0.029915
Amp	2	113317768	113382838	0	0.008528	0.407274	0.032051
Amp	2	113385740	113827728	0	0.006204	0.405478	0.029915
Amp	2	113833016	113968909	0	0.013372	0.502009	0.029915
Amp	2	113971522	116176427	0	0.001768	0.347737	0.029915
Amp	2	116180527	117194355	0	0.000584	0.361948	0.027778
Amp	2	117197726	117248977	0	0.003747	0.378462	0.029915
Amp	2	117251211	120235443	0	0.000584	0.361948	0.027778
Amp	2	120240738	120684254	0	0.001739	0.350789	0.029915
Amp	2	120687899	120855419	0	0.003535	0.351595	0.032051
Amp	2	120859682	121767850	0	0.001739	0.350789	0.029915
Amp	2	121770016	123484614	0	0.000584	0.331274	0.029915
Amp	2	123484634	123602963	0.579062	0.039765	0.68882	0.036325
Amp	2	123602994	124150034	0	0.000584	0.293082	0.032051
Amp	2	124152138	125790974	0	0.002535	0.307136	0.032051
Amp	2	125791393	126511241	0	0.000584	0.327292	0.029915
Amp	2	126513290	127893345	0	0.004938	0.359489	0.032051
Amp	2	127897139	129305381	0	0.000584	0.276037	0.027778
Amp	2	129313678	130454138	0	0.001557	0.276707	0.029915
Amp	2	130455273	130753460	0	0.004773	0.345441	0.029915
Amp	2	130765299	130987281	0	0.010368	0.424623	0.029915
Amp	2	130988838	131182918	0	0.007152	0.411245	0.027778
Amp	2	131182921	131901780	0	0.001998	0.355968	0.027778
Amp	2	131905616	131945704	0	0.008805	0.456537	0.027778
Amp	2	132603497	134329638	0	0.015865	0.557624	0.027778
Amp	2	134330882	134517195	0	0.011978	0.501067	0.027778
Amp	2	134520843	134769673	0	0.015865	0.556712	0.027778
Amp	2	134772132	134832996	0	0.012963	0.515158	0.027778
Amp	2	134835984	134910381	0	0.013935	0.493959	0.029915
Amp	2	134911644	135246227	0	0.012963	0.508674	0.027778
Amp	2	135246410	136705127	0	0.015865	0.550228	0.027778
Amp	2	136705766	136731631	0.060945	0.026559	0.666557	0.029915
Amp	2	136738050	137579857	0	0.015865	0.561845	0.027778
Amp	2	137582183	137612252	0	0.020502	0.552155	0.032051
Amp	2	137614748	138652999	0	0.015865	0.529378	0.029915
Amp	2	138653422	139157248	0	0.018088	0.523173	0.032051
Amp	2	139162598	139937894	0	0.002807	0.293195	0.032051
Amp	2	139938247	140055707	0	0.006957	0.31371	0.036325
Amp	2	140057536	140227228	0	0.011088	0.338997	0.038462
Amp	2	140242733	140367383	0	0.006957	0.31371	0.036325
Amp	2	140371274	140400402	0	0.020964	0.44111	0.038462
Amp	2	140408104	140498177	0	0.016814	0.419362	0.036325
Amp	2	140500048	140507511	0	0.002807	0.28264	0.034188
Amp	2	140507793	140548646	0	0.003961	0.283255	0.036325
Amp	2	140549029	140733328	0	0.005464	0.29971	0.036325
Amp	2	140733751	140735131	0	0.003241	0.291172	0.034188
Amp	2	140735686	140869731	0	0.002087	0.291043	0.032051
Amp	2	140880811	141304609	0	0.000584	0.272233	0.032051
Amp	2	141307419	141746977	0	0.017843	0.435344	0.036325
Amp	2	141748161	141882063	0	0.000584	0.261789	0.034188
Amp	2	141882942	141965856	0	0.002233	0.264437	0.036325
Amp	2	141974898	142109929	0	0.000584	0.261789	0.034188
Amp	2	142113351	142180146	0	0	0.270727	0.032051
Amp	2	142183408	142640198	0	0.001371	0.281009	0.032051
Amp	2	142642968	142714359	0	0.013393	0.421885	0.032051
Amp	2	142714431	142885789	0	0.012022	0.433495	0.029915
Amp	2	142889750	142969135	0	0	0.294729	0.027778
Amp	2	142975807	143311927	0	0.001474	0.293278	0.029915
Amp	2	143312320	144502693	0	0	0.294729	0.027778
Amp	2	144509675	145177336	0	0.015281	0.556304	0.027778
Amp	2	145178808	145429647	0	0.021206	0.598017	0.029915
Amp	2	145429936	145696322	0	0.015281	0.556304	0.027778
Amp	2	145697346	146136334	0	0.016357	0.536575	0.029915
Amp	2	146139338	146335730	0	0.014202	0.507926	0.029915
Amp	2	146336245	146877915	0	0.013126	0.525451	0.027778
Amp	2	146879483	147435484	0	0	0.292065	0.027778
Amp	2	147436347	147943359	0	0.000892	0.291595	0.029915
Amp	2	147946396	148092863	0	0	0.279737	0.029915
Amp	2	148093607	148184514	0	0.004817	0.322452	0.032051
Amp	2	148197222	149877421	0	0	0.292065	0.027778
Amp	2	149877896	152132620	0	0.000903	0.29058	0.029915
Amp	2	152141565	152231393	0	0.005086	0.323725	0.032051
Amp	2	152231482	152851701	0	0.004182	0.333486	0.029915
Amp	2	152851914	159099246	0	0	0.298542	0.027778
Amp	2	159100008	159107684	1.65111	0.058571	0.952617	0.034188
Amp	2	159108004	159783684	0	0	0.328562	0.027778
Amp	2	159785905	159828475	0	0.0037	0.357169	0.029915
Amp	2	159831840	159970764	0	0	0.328562	0.027778
Amp	2	159971869	160145814	0	0.002486	0.383003	0.027778
Amp	2	160146159	160314943	0	0	0.33981	0.027778
Amp	2	160315549	160339999	0	0.001633	0.370787	0.027778
Amp	2	160340357	160360210	8.90249	0.152886	1.57537	0.044872
Amp	2	160361024	161788364	0	0.001633	0.370787	0.027778
Amp	2	161789492	161884603	0	0.003359	0.349015	0.032051
Amp	2	161886414	162051763	0	0.001726	0.3092	0.032051
Amp	2	162053713	162933212	0	0.003151	0.345863	0.032051
Amp	2	162933981	163248056	0	0.004851	0.385763	0.032051
Amp	2	163248083	163700950	0	0.008387	0.40459	0.034188
Amp	2	163702822	163751924	0	0.006687	0.381887	0.034188
Amp	2	163752029	163978954	0	0.0091	0.418398	0.034188
Amp	2	163980254	164269535	0	0.006687	0.367191	0.034188
Amp	2	164269935	164857162	0	0.008218	0.408137	0.034188
Amp	2	164860058	166017213	0	0.00979	0.43071	0.034188
Amp	2	166017849	166253204	0	0.008218	0.412425	0.034188
Amp	2	166253754	166286700	0	0.004682	0.394119	0.032051
Amp	2	166292693	166377922	0	0.007015	0.397444	0.034188
Amp	2	166378518	166530898	0	0.009176	0.422579	0.034188
Amp	2	166536597	166536597	0	0.012718	0.4382	0.036325
Amp	2	166538286	166987227	0	0.008224	0.412494	0.034188
Amp	2	166987869	167788909	0	0.009991	0.433054	0.034188
Amp	2	167789100	167944961	0	0.009442	0.445893	0.032051
Amp	2	167945871	168069697	0	0.005901	0.422772	0.029915
Amp	2	168070827	169213662	0	0.006728	0.406786	0.032051
Amp	2	169214656	169246871	0	0.005002	0.412896	0.029915
Amp	2	169254788	169554975	0	0.008331	0.457144	0.029915
Amp	2	169558931	169599707	0	0.012438	0.477632	0.032051
Amp	2	169600435	169920113	0	0.008331	0.457144	0.029915
Amp	2	169929650	170234922	0	0.007503	0.478234	0.027778
Amp	2	170235935	170249278	0	0.008522	0.459683	0.029915
Amp	2	170250306	170333179	0	0.010474	0.485634	0.029915
Amp	2	170347668	170467107	0	0.012066	0.473011	0.032051
Amp	2	170467284	171228416	0	0.010474	0.485634	0.029915
Amp	2	171228975	171343855	0	0.015399	0.511144	0.032051
Amp	2	171360440	171440163	0	0.010474	0.482123	0.029915
Amp	2	171442178	171612018	0	0.004655	0.399862	0.029915
Amp	2	171614062	172480261	0	0.003847	0.343617	0.029915
Amp	2	172480668	174752980	0	0.000876	0.374303	0.027778
Amp	2	174756207	175023412	0	0.005417	0.408117	0.029915
Amp	2	175027398	178068563	0	0.000876	0.374303	0.027778
Amp	2	178070586	178152822	0	0.013249	0.495911	0.027778
Amp	2	178157201	179714418	0	0.000876	0.342211	0.025641
Amp	2	179715274	179796235	0	0.01233	0.472614	0.029915
Amp	2	179799861	180709988	0	0.000876	0.342101	0.027778
Amp	2	180711567	180833632	0	0.013446	0.484766	0.029915
Amp	2	180843518	181380781	0	0.002228	0.335631	0.029915
Amp	2	181386937	181420111	0	0.000876	0.364247	0.027778
Amp	2	181424734	181474740	0	0.014434	0.51847	0.029915
Amp	2	181475579	181505447	0	0.000876	0.364247	0.027778
Amp	2	181507424	181952825	0	0.002986	0.374709	0.029915
Amp	2	181953573	182411843	0	0.000876	0.346668	0.029915
Amp	2	182412654	182418568	0	0.014518	0.492829	0.032051
Amp	2	182419625	182732735	0	0.000876	0.346668	0.029915
Amp	2	182735041	183573098	0	0.002142	0.339257	0.032051
Amp	2	183576327	183928505	0	0.000876	0.346668	0.029915
Amp	2	183946220	184286588	0	0.014056	0.487095	0.032051
Amp	2	184290169	184306330	3.4426	0.086723	1.10828	0.040598
Amp	2	184306640	184603875	0	0.014056	0.498358	0.032051
Amp	2	184604136	184666661	0	0.018266	0.519257	0.034188
Amp	2	184674950	185106782	0	0.005086	0.390336	0.032051
Amp	2	185110571	185409890	0	0.000876	0.358735	0.029915
Amp	2	185410040	185433729	0	0.001899	0.336903	0.034188
Amp	2	186024241	186039793	0	0.012255	0.430466	0.036325
Amp	2	186047532	186288222	0	0.003356	0.333042	0.036325
Amp	2	186294632	186372833	0	0.002334	0.338342	0.034188
Amp	2	186372894	186756700	0	0.000876	0.342813	0.032051
Amp	2	186758189	186937417	0	0.005794	0.378588	0.034188
Amp	2	186937430	186951836	0	0.007431	0.374479	0.036325
Amp	2	186954712	187005553	0	0.002513	0.340683	0.034188
Amp	2	187005753	187073628	0	0.004242	0.339568	0.036325
Amp	2	187077787	187204811	0	0.002605	0.341496	0.034188
Amp	2	187206551	187385057	0	0.006849	0.368198	0.036325
Amp	2	187387996	187497037	0	0.00512	0.371102	0.034188
Amp	2	187500167	187947452	0	0.000876	0.342813	0.032051
Amp	2	187948929	188167826	0	0.002584	0.341255	0.034188
Amp	2	188168023	188274349	0	0.000876	0.342813	0.032051
Amp	2	188274649	188400899	0	0.00276	0.343297	0.034188
Amp	2	188419634	188585038	0	0.004033	0.362809	0.034188
Amp	2	188586136	192030630	0	0.00215	0.353706	0.032051
Amp	2	192033589	192415150	0	0.000876	0.289996	0.032051
Amp	2	192415251	193513535	0	0.001453	0.279659	0.034188
Amp	2	193516236	193816243	0	0.005604	0.309797	0.036325
Amp	2	193842772	195371502	0	0.001453	0.279659	0.034188
Amp	2	195372014	196223341	0	0.000876	0.313828	0.027778
Amp	2	196223524	196259458	0	0.001443	0.303448	0.029915
Amp	2	196259468	196899709	0	0.000876	0.313828	0.027778
Amp	2	196900082	197090056	0	0.002846	0.328462	0.027778
Amp	2	197095674	197971117	0	0.004168	0.322574	0.029915
Amp	2	197974378	203705416	0	0.002198	0.31919	0.027778
Amp	2	203709272	204605154	0	0.002754	0.301693	0.027778
Amp	2	204605228	205408818	0	0.004025	0.30904	0.029915
Amp	2	205408980	205580391	0	0.002754	0.30985	0.027778
Amp	2	205584925	205590678	0	0.010914	0.398886	0.029915
Amp	2	205597023	205749367	0	0.002754	0.30985	0.027778
Amp	2	205749513	207899253	0	0.002198	0.325826	0.025641
Amp	2	207900601	208158529	0	0.004779	0.331748	0.027778
Amp	2	208161008	209020392	0	0.002198	0.303272	0.027778
Amp	2	209025625	209219306	0	0.005354	0.310211	0.034188
Amp	2	209224503	209877309	0	0.007754	0.338132	0.034188
Amp	2	209878759	209899638	0	0.004598	0.319579	0.032051
Amp	2	209906625	211433113	0	0.002198	0.301998	0.029915
Amp	2	211434658	211572648	0	0.00633	0.334019	0.032051
Amp	2	211576871	211617199	0	0.002923	0.29174	0.032051
Amp	2	211619242	213105076	0	0.002198	0.301998	0.029915
Amp	2	213107780	213260197	0	0.003948	0.317403	0.029915
Amp	2	213263537	214829926	0	0.002198	0.31676	0.027778
Amp	2	214830975	216026896	0	0.003738	0.33104	0.027778
Amp	2	216026941	217354443	0	0.002198	0.325676	0.025641
Amp	2	217355111	217814160	0	0.003294	0.320572	0.027778
Amp	2	217815715	217843709	0	0.007642	0.380633	0.027778
Amp	2	217843829	218092000	0	0.006547	0.394129	0.025641
Amp	2	218093591	218356770	0	0.007131	0.350918	0.029915
Amp	2	218356900	218816976	0	0.008385	0.328371	0.034188
Amp	2	218820761	218936361	0	0.007131	0.334696	0.032051
Amp	2	218940671	219073282	0	0.002782	0.292657	0.029915
Amp	2	219073866	219937922	0	0.002198	0.306273	0.027778
Amp	2	219939138	221432387	0	0.00295	0.338747	0.025641
Amp	2	221436637	221606796	0	0.003622	0.321353	0.027778
Amp	2	221607842	222416754	0	0.00295	0.337614	0.025641
Amp	2	222421728	222563135	0	0.00693	0.383136	0.025641
Amp	2	222567030	223299885	0	0.005302	0.357889	0.025641
Amp	2	223300123	223978684	0	0.001322	0.332756	0.023504
Amp	2	223981166	223989351	0	0.008728	0.423025	0.025641
Amp	2	223990678	224495194	0	0.001322	0.332756	0.023504
Amp	2	224495519	224506100	0	0.006573	0.389948	0.025641
Amp	2	224509102	224887911	0	0.001322	0.332756	0.023504
Amp	2	224890035	225114216	0	0.002345	0.320894	0.025641
Amp	2	225115080	228763526	0	0.001322	0.332756	0.023504
Amp	2	228770232	229234052	0	0.003971	0.346658	0.025641
Amp	2	229235916	230177764	0	0.001322	0.334418	0.023504
Amp	2	230180666	230260506	0	0.005419	0.336204	0.027778
Amp	2	230271575	230271575	0	0.002412	0.316996	0.025641
Amp	2	230274500	230356336	0	0.001322	0.326773	0.023504
Amp	2	230356377	230393900	0	0.006113	0.373847	0.025641
Amp	2	230400636	231893980	0	0.001322	0.326773	0.023504
Amp	2	231894643	232312415	0	0.002133	0.290861	0.025641
Amp	2	232312517	233820363	0	0.001322	0.296638	0.023504
Amp	2	233821249	233849754	0	0.007276	0.364592	0.025641
Amp	2	233849893	233853569	0	0.001322	0.296638	0.023504
Amp	2	233855851	233996894	0	0.004987	0.330071	0.025641
Amp	2	233999724	234391472	0	0.001322	0.296638	0.023504
Amp	2	234396415	234465938	0	0.004554	0.322982	0.025641
Amp	2	234466711	234661964	0	0.001322	0.296638	0.023504
Amp	2	234665381	235165180	0	0.005765	0.344046	0.025641
Amp	2	235167112	235190199	0	0.013963	0.404392	0.029915
Amp	2	235191971	235333622	0	0.005765	0.344046	0.025641
Amp	2	235333793	235352211	0	0.010717	0.420845	0.025641
Amp	2	235352880	235398851	0	0.015787	0.502006	0.025641
Amp	2	235401586	235480054	0	0.010717	0.423368	0.025641
Amp	2	235482808	235508427	0	0.005765	0.346486	0.025641
Amp	2	235513170	235676266	0	0.010166	0.387238	0.027778
Amp	2	235681333	236284563	0	0.005765	0.346486	0.025641
Amp	2	236286776	240776486	0	0.001322	0.299391	0.023504
Amp	2	240788528	240906723	0	0.005992	0.345321	0.025641
Amp	2	240926199	241536647	0	0.001322	0.296091	0.023504
Amp	3	2170634	2306437	0.147829	0.029603	0.363811	0.059829
Amp	3	2308573	2322815	0.083606	0.027387	0.351254	0.059829
Amp	3	2322963	2323933	0.097156	0.028109	0.34458	0.061966
Amp	3	2780268	2780466	0	0.024186	0.330809	0.059829
Amp	3	2781392	2947044	0	0.022133	0.328156	0.057692
Amp	3	2947958	2983374	0	0.023234	0.323758	0.059829
Amp	3	2984831	3055243	0.00193	0.02473	0.322192	0.061966
Amp	3	3056126	3129226	0	0.022515	0.315645	0.059829
Amp	3	3129776	3421980	0	0.021019	0.317027	0.057692
Amp	3	3427010	3516810	0	0.022953	0.317832	0.061966
Amp	3	3516843	3600110	0	0.021019	0.30542	0.061966
Amp	3	3602129	3700147	0	0.021694	0.301388	0.064103
Amp	3	3700605	3812583	0	0.021019	0.30542	0.061966
Amp	3	3812607	4666752	0	0.020139	0.299775	0.061966
Amp	3	4669763	4765626	0	0.020695	0.302208	0.061966
Amp	3	4765866	4860490	0	0.020139	0.300846	0.061966
Amp	3	4862244	5013455	0	0.022611	0.317345	0.061966
Amp	3	5116914	5458146	0.065311	0.026844	0.333412	0.064103
Amp	3	6105882	6207520	0	0.023156	0.311986	0.064103
Amp	3	6207577	6221160	0.060945	0.026588	0.327007	0.066239
Amp	3	6221175	6228016	0.083606	0.027141	0.320005	0.068376
Amp	3	6232126	6599013	0.088405	0.027914	0.324505	0.068376
Amp	3	6599125	6638111	0.116712	0.028518	0.328874	0.068376
Amp	3	6638362	7015805	0.139453	0.029202	0.324582	0.070513
Amp	3	7016158	8189803	0.159346	0.029888	0.331034	0.070513
Amp	3	8195165	8205499	0.031807	0.025679	0.301402	0.074786
Amp	3	8205658	8761165	0.060945	0.026438	0.297157	0.076923
Amp	3	8764845	8903618	0.031807	0.025754	0.291608	0.07906
Amp	3	8903993	9034471	0.147829	0.029638	0.303828	0.081197
Amp	3	9035766	9048989	0.169468	0.030241	0.308213	0.081197
Amp	3	9049221	9258146	0.215535	0.031694	0.308779	0.083333
Amp	3	9267515	9274101	0.244173	0.032244	0.310049	0.083333
Amp	3	9275919	9605833	0.378904	0.035628	0.318246	0.08547
Amp	3	9607237	9695215	0.402249	0.036223	0.325936	0.08547
Amp	3	9697551	10055423	0.244173	0.032339	0.31491	0.083333
Amp	3	10056447	10370143	0.190675	0.030886	0.316867	0.081197
Amp	3	10371842	10391360	0.087213	0.027502	0.30819	0.07906
Amp	3	10394095	10966023	0.139453	0.0291	0.309943	0.081197
Amp	3	10969567	11274457	0.266541	0.03281	0.325395	0.081197
Amp	3	11277107	11406399	0.439583	0.036951	0.346702	0.07906
Amp	3	11410169	11411030	0.609419	0.040345	0.355393	0.081197
Amp	3	11421150	11484521	0.426244	0.036635	0.346335	0.07906
Amp	3	11508122	11577208	0.277028	0.03324	0.337151	0.076923
Amp	3	11577771	11945060	0.215535	0.031642	0.336076	0.074786
Amp	3	11945308	11966436	0.325658	0.034591	0.342387	0.076923
Amp	3	11968190	12522803	0.244173	0.032279	0.330432	0.076923
Amp	3	12526926	12715395	0.141773	0.02933	0.323779	0.074786
Amp	3	12715447	12787816	0.285294	0.033364	0.336031	0.076923
Amp	3	12798344	12960142	0.141773	0.02933	0.323779	0.074786
Amp	3	12962586	12982043	0.012441	0.025189	0.31246	0.07265
Amp	3	13013995	14547891	0.000135	0.02464	0.316338	0.070513
Amp	3	14549839	14567792	0.190675	0.030702	0.347634	0.070513
Amp	3	14569947	15049904	0.000135	0.02464	0.311868	0.070513
Amp	3	15053261	15177852	0.139453	0.029033	0.331886	0.070513
Amp	3	15182366	15838778	0.000135	0.02464	0.316301	0.068376
Amp	3	15839494	16211762	0	0.023918	0.328831	0.064103
Amp	3	16211796	16985707	0	0.022131	0.328704	0.061966
Amp	3	16985713	17479476	0	0.021577	0.324323	0.061966
Amp	3	17479711	17563471	0	0.020945	0.330134	0.059829
Amp	3	17566036	18713475	0	0.020392	0.338549	0.057692
Amp	3	18714085	18993316	0	0.019797	0.348025	0.053419
Amp	3	18996859	20208305	0	0.01911	0.337893	0.053419
Amp	3	20214665	20260811	0	0.015452	0.327406	0.049145
Amp	3	20263584	20380340	0	0.01466	0.333626	0.047009
Amp	3	20405351	20880808	0	0.015439	0.3273	0.049145
Amp	3	20881081	20958633	0	0.014665	0.301975	0.053419
Amp	3	20959798	21740235	0	0.015313	0.296047	0.055556
Amp	3	21740245	21740672	0	0.014665	0.309993	0.051282
Amp	3	22176672	22177673	0	0.014062	0.305321	0.051282
Amp	3	22185876	22512792	0	0.015757	0.30572	0.053419
Amp	3	22568061	22582888	0	0.019536	0.326827	0.055556
Amp	3	22584625	22755642	0.337963	0.034799	0.436091	0.055556
Amp	3	22842431	22902666	0	0.017842	0.327288	0.053419
Amp	3	22902728	23086002	0	0.014062	0.311584	0.051282
Amp	3	23087053	23261266	0	0.017986	0.328366	0.053419
Amp	3	23262262	23338233	0	0.020541	0.321923	0.057692
Amp	3	23340715	23369643	0	0.017986	0.316018	0.055556
Amp	3	23371389	23464936	0.107782	0.028463	0.376533	0.057692
Amp	3	23465342	23529163	0.210626	0.031251	0.395752	0.057692
Amp	3	23531290	23628302	0	0.017986	0.316018	0.055556
Amp	3	23631223	24272468	0	0.018632	0.320639	0.055556
Amp	3	24276100	24654937	0.266541	0.032996	0.405035	0.057692
Amp	3	24662663	24779720	0.139453	0.029072	0.392493	0.055556
Amp	3	24782145	25218532	0	0.014708	0.297693	0.053419
Amp	3	25219756	25389344	0	0.014062	0.292119	0.053419
Amp	3	25389683	25446359	0	0.014733	0.302522	0.051282
Amp	3	25447067	25587685	0	0.014062	0.31227	0.047009
Amp	3	25587698	25890932	0	0.015145	0.316723	0.047009
Amp	3	25894556	25916823	0	0.014062	0.321473	0.044872
Amp	3	25917328	26513785	0	0.014889	0.3288	0.044872
Amp	3	26513968	26845209	0	0.015498	0.334208	0.044872
Amp	3	26849975	26926438	0.097156	0.02804	0.425122	0.047009
Amp	3	27040272	27401997	0	0.015498	0.334208	0.044872
Amp	3	27402173	27768298	0	0.014105	0.333179	0.042735
Amp	3	27770884	28019533	0	0.016214	0.356237	0.042735
Amp	3	28030278	28385487	0	0.018156	0.356488	0.044872
Amp	3	28385538	28698308	0	0.016214	0.356237	0.042735
Amp	3	28698598	28811526	0.1271	0.028921	0.451895	0.044872
Amp	3	28815648	28838332	0.065311	0.026812	0.433204	0.044872
Amp	3	28840697	29114558	0	0.014105	0.336611	0.042735
Amp	3	29116531	29207343	0.083606	0.027338	0.438553	0.044872
Amp	3	29211553	29557114	0	0.014105	0.337333	0.042735
Amp	3	29560595	29566879	0.073993	0.026887	0.434555	0.044872
Amp	3	29568997	29601577	0.087213	0.027432	0.423754	0.047009
Amp	3	29602300	29700493	0.031807	0.025526	0.424348	0.044872
Amp	3	29703945	29708652	0	0.012744	0.326616	0.042735
Amp	3	29711597	29775625	0.073993	0.026937	0.43685	0.044872
Amp	3	29776167	29863776	0.17979	0.030508	0.447377	0.047009
Amp	3	29865808	29885186	0.266541	0.033014	0.468585	0.047009
Amp	3	29887177	29928025	0.141773	0.029444	0.459068	0.044872
Amp	3	29929257	30152851	0	0.015251	0.349945	0.042735
Amp	3	30154296	30316022	0.107782	0.028426	0.45005	0.044872
Amp	3	30316766	30588155	0	0.015251	0.35981	0.040598
Amp	3	30596023	30639603	0.088405	0.027729	0.452831	0.042735
Amp	3	30642014	30657128	0	0.018775	0.369507	0.042735
Amp	3	30659361	30665784	0	0.015251	0.354438	0.040598
Amp	3	30666940	30755633	0.107782	0.028284	0.458	0.042735
Amp	3	30757576	30762681	0	0.015251	0.354438	0.040598
Amp	3	30765092	31033203	0.087213	0.027595	0.451591	0.042735
Amp	3	31035404	31051970	0	0.015251	0.354438	0.040598
Amp	3	31053274	31789628	0	0.014492	0.365873	0.038462
Amp	3	31790038	32491518	0	0.015152	0.353828	0.040598
Amp	3	32492472	32647868	0	0.016032	0.348022	0.042735
Amp	3	32649231	33416811	0	0.015371	0.359127	0.040598
Amp	3	33418898	34159450	0	0.017494	0.365115	0.042735
Amp	3	34159784	34281484	0	0.01019	0.308556	0.040598
Amp	3	34281851	38607330	0	0.00931	0.316553	0.038462
Amp	3	38611228	39054207	0	0.008208	0.316047	0.038462
Amp	3	39054305	39419576	0	0.009378	0.313786	0.040598
Amp	3	39422495	39615264	0	0.008208	0.316047	0.038462
Amp	3	39619764	39963665	0	0.008928	0.306462	0.040598
Amp	3	39965536	40119563	0	0.008208	0.326054	0.036325
Amp	3	40122149	40614600	0	0.009156	0.317744	0.038462
Amp	3	40616458	40891329	0	0.008208	0.326054	0.036325
Amp	3	40899836	40945413	0	0.009001	0.316138	0.038462
Amp	3	40949749	41227148	0	0.008208	0.326054	0.036325
Amp	3	41227222	41474089	0	0.007663	0.334123	0.034188
Amp	3	41477953	43554781	0	0.00554	0.315565	0.034188
Amp	3	43555800	44244773	0	0.004198	0.334812	0.032051
Amp	3	44247351	44392768	0	0.001387	0.31686	0.029915
Amp	3	44394261	44464028	0	0.002144	0.307596	0.032051
Amp	3	44464737	44778039	0	0.001387	0.319516	0.029915
Amp	3	44781928	45413197	0	0.000779	0.293947	0.032051
Amp	3	45414563	45520713	0	0.002103	0.283696	0.036325
Amp	3	45522256	45585624	0	0.006366	0.312054	0.038462
Amp	3	45589145	45885005	0	0.002103	0.283696	0.036325
Amp	3	45885077	46459723	0	0.000779	0.274625	0.036325
Amp	3	46460279	47181322	0	0	0.275113	0.034188
Amp	3	47183312	47254103	0	0.005265	0.318285	0.036325
Amp	3	47257245	47296871	0	0	0.275113	0.034188
Amp	3	47306623	47306623	0	0.003879	0.30225	0.036325
Amp	3	47308754	47509349	0	0.007323	0.321071	0.038462
Amp	3	47509695	47820670	0	0.009525	0.327591	0.040598
Amp	3	47821089	47825983	0	0.005646	0.305493	0.038462
Amp	3	47826237	47889792	0	0.002202	0.285755	0.036325
Amp	3	47895181	48116762	0	0.002971	0.280231	0.038462
Amp	3	48120858	48201192	0	0.000769	0.254353	0.040598
Amp	3	48215640	48226834	0	0.005385	0.288736	0.042735
Amp	3	48229622	48329265	0	0.009277	0.310037	0.044872
Amp	3	48329279	48439925	0	0.004661	0.278439	0.042735
Amp	3	48445644	48921736	0	0.006852	0.286271	0.044872
Amp	3	48923598	48997919	0	0.00296	0.263781	0.042735
Amp	3	49001525	49064980	0	0.004238	0.263637	0.044872
Amp	3	49075245	49198763	0	0.008799	0.290878	0.047009
Amp	3	49200889	49708767	0	0.004238	0.263637	0.044872
Amp	3	49714152	49736431	0	0.009594	0.297414	0.047009
Amp	3	49745398	49758490	0	0.012661	0.309408	0.049145
Amp	3	49770845	49779332	0	0.01047	0.303339	0.047009
Amp	3	49790059	49919839	0	0.015051	0.327981	0.049145
Amp	3	49924879	50150576	0	0.013774	0.331037	0.047009
Amp	3	50150876	50201977	0	0.016163	0.335974	0.049145
Amp	3	50202071	50233781	0	0.013774	0.331037	0.047009
Amp	3	50243736	50661849	0	0.010707	0.319502	0.044872
Amp	3	50681914	50824180	0	0.005351	0.301832	0.038462
Amp	3	50824782	52204640	0	0.000769	0.278163	0.034188
Amp	3	52204661	52402408	0	0	0.284286	0.032051
Amp	3	52407590	52580336	0	0.007575	0.355358	0.034188
Amp	3	52588192	52654047	0	0.002756	0.2993	0.034188
Amp	3	52658160	52980708	0	0.00463	0.302209	0.036325
Amp	3	52980798	53066198	0	0.002756	0.306481	0.032051
Amp	3	53067564	53079746	0	0.012431	0.419526	0.032051
Amp	3	53082649	53626003	0	0.004339	0.333998	0.029915
Amp	3	53628591	54262189	0	0.002756	0.333729	0.027778
Amp	3	54264023	54917890	0	0.00573	0.343533	0.029915
Amp	3	54917905	59244814	0	0.002756	0.320622	0.029915
Amp	3	59250037	59431237	0	0.004249	0.285504	0.032051
Amp	3	59431460	61487212	0	0.002756	0.285437	0.029915
Amp	3	61490094	61508578	0	0.022271	0.510199	0.032051
Amp	3	61509218	62571193	0	0.002756	0.285437	0.029915
Amp	3	62572458	62639126	0	0.004149	0.290781	0.032051
Amp	3	62639491	63054473	0	0.002756	0.285437	0.029915
Amp	3	63055506	63445172	0	0.003385	0.275592	0.032051
Amp	3	63447895	63453738	0	0.002756	0.278773	0.029915
Amp	3	63463530	63682003	0	0.007955	0.325011	0.032051
Amp	3	63684464	65452257	0	0.002756	0.278773	0.029915
Amp	3	65453500	65907902	0	0.004987	0.288254	0.032051
Amp	3	65909031	65979515	0	0.0103	0.354916	0.032051
Amp	3	65979671	65992417	0	0.006393	0.306446	0.032051
Amp	3	65999378	66271688	0	0.010841	0.361634	0.032051
Amp	3	66272201	66663986	0	0.004987	0.288943	0.032051
Amp	3	66668603	66740723	0	0.002756	0.291742	0.027778
Amp	3	66740798	66871364	0	0.006367	0.322979	0.029915
Amp	3	66883159	68143936	0	0.002756	0.291742	0.027778
Amp	3	68145143	68567043	0	0.002215	0.293347	0.025641
Amp	3	68569530	68593581	0	0.008179	0.356164	0.027778
Amp	3	68598771	72182051	0	0.002215	0.293347	0.025641
Amp	3	72183597	72192971	0	0.00785	0.361759	0.027778
Amp	3	72197497	74374574	0	0.002215	0.301662	0.025641
Amp	3	74385662	74424654	0	0.003317	0.246023	0.036325
Amp	3	74424742	76467354	0	0.002215	0.248585	0.034188
Amp	3	76467616	78231980	0	0	0.243972	0.029915
Amp	3	78235875	78513600	0	0.000559	0.236685	0.032051
Amp	3	78515034	78864444	0	0.00499	0.274086	0.034188
Amp	3	78870836	78957572	0	0.004431	0.276107	0.034188
Amp	3	78967932	80674714	0	0	0.238841	0.032051
Amp	3	80677752	80716513	0	0.003886	0.277959	0.032051
Amp	3	80724212	83569594	0	0	0.246156	0.029915
Amp	3	83582641	83768377	0	0.007851	0.31093	0.032051
Amp	3	83773642	83816644	0	0.009259	0.308569	0.034188
Amp	3	83826893	83959390	0	0.001408	0.231723	0.032051
Amp	3	83962813	84850870	0	0	0.228763	0.029915
Amp	3	84852517	85301508	0	0.001124	0.227947	0.032051
Amp	3	85308893	85386890	0	0.004027	0.25616	0.032051
Amp	3	85390464	87659020	0	0.002903	0.258991	0.029915
Amp	3	87661956	88588931	0	0.003541	0.25738	0.029915
Amp	3	88589091	90164751	0	0.002903	0.224523	0.025641
Amp	3	90169207	90368798	0	0.003891	0.23215	0.025641
Amp	3	90369509	91390926	0	0.004438	0.223289	0.027778
Amp	3	91462299	91462299	0	0.001535	0.192541	0.027778
Amp	3	94015345	94397203	0	0.009512	0.28583	0.029915
Amp	3	94397536	94809109	0	0.004529	0.234709	0.027778
Amp	3	94815361	94976649	0	0.008771	0.277747	0.029915
Amp	3	94978974	95134410	0	0.010704	0.303457	0.029915
Amp	3	95135124	95153324	0	0.010157	0.317803	0.027778
Amp	3	95155327	95185200	0	0.003982	0.244521	0.025641
Amp	3	95186054	95186054	0	0.005388	0.246397	0.027778
Amp	3	95189262	95355517	0	0.010766	0.301932	0.029915
Amp	3	95360148	95592015	0	0.005388	0.246397	0.027778
Amp	3	95592032	97739971	0	0.003982	0.244521	0.025641
Amp	3	97743657	97785433	0	0.004726	0.256754	0.023504
Amp	3	97788399	98172728	0	0.003982	0.268594	0.021368
Amp	3	98211020	98264273	0	0.007905	0.310282	0.023504
Amp	3	98272200	98414857	0	0.003982	0.267894	0.021368
Amp	3	98416560	98450228	0	0.004799	0.262193	0.023504
Amp	3	98451606	99449669	0	0.003982	0.267894	0.021368
Amp	3	99463008	99669059	0	0	0.228368	0.017094
Amp	3	99673722	100080867	0	0.004606	0.300801	0.019231
Amp	3	100082073	100159272	0	0	0.228368	0.017094
Amp	3	100166113	100389307	0	0.002092	0.25491	0.019231
Amp	3	100392895	100468017	0	0.005645	0.29784	0.021368
Amp	3	100486114	101390960	0	0.002092	0.25491	0.019231
Amp	3	101394129	101651545	0	0.00436	0.316962	0.023504
Amp	3	101652447	103018897	0	0.002092	0.306441	0.021368
Amp	3	103020398	103058369	0	0.006773	0.342449	0.025641
Amp	3	103060998	103115201	0	0.010291	0.366476	0.027778
Amp	3	103123682	105252964	0	0.006773	0.342449	0.025641
Amp	3	105254598	105580934	0	0.010409	0.367906	0.027778
Amp	3	105635104	105652296	0	0.005727	0.322162	0.025641
Amp	3	105654992	106512845	0	0.002092	0.289941	0.023504
Amp	3	106513532	106566719	0	0.005795	0.323426	0.025641
Amp	3	106570245	109710269	0	0.002092	0.289083	0.023504
Amp	3	109715008	109820028	0	0.011955	0.444317	0.023504
Amp	3	109822528	110881670	0	0.002092	0.305176	0.021368
Amp	3	110881749	110909862	0	0.015375	0.502183	0.023504
Amp	3	110926462	111324451	0	0.010667	0.422528	0.023504
Amp	3	111327381	111622970	0	0.002092	0.308096	0.021368
Amp	3	111632589	111682625	0	0.011918	0.446344	0.023504
Amp	3	111684911	112156179	0	0.002092	0.308096	0.021368
Amp	3	112156272	113405060	0	0	0.271877	0.021368
Amp	3	113412608	114357433	0	0.00956	0.391472	0.025641
Amp	3	114357512	114819366	0	0.006879	0.333005	0.027778
Amp	3	114820958	115451599	0	0.009085	0.339015	0.029915
Amp	3	115457037	115663867	0	0.013149	0.367442	0.032051
Amp	3	115664552	115879549	0	0.007876	0.302012	0.032051
Amp	3	115886297	115948146	0	0.003812	0.268911	0.029915
Amp	3	115952025	116193582	0	0.001606	0.257509	0.027778
Amp	3	116194355	116395349	0	0.003907	0.266252	0.032051
Amp	3	116401587	116492362	0	0.006887	0.310518	0.029915
Amp	3	116493396	117181015	0	0.004586	0.295319	0.027778
Amp	3	117183341	119214037	0	0.001606	0.250308	0.027778
Amp	3	119217152	121571465	0	0.003619	0.278658	0.027778
Amp	3	121572059	121676841	0	0.019488	0.470099	0.029915
Amp	3	121681376	122730067	0	0.003619	0.278658	0.027778
Amp	3	122739953	123603116	0	0.007529	0.316044	0.029915
Amp	3	123606227	124165316	0	0.003619	0.282834	0.027778
Amp	3	124170602	124463289	0	0.009061	0.360739	0.027778
Amp	3	124463744	124526807	0	0.012078	0.403939	0.027778
Amp	3	124529460	124560420	0	0.017339	0.449391	0.029915
Amp	3	124565054	124670758	0	0.012078	0.403939	0.027778
Amp	3	124673064	124730444	0	0.016561	0.439048	0.029915
Amp	3	124734536	124900453	0	0.008102	0.323712	0.029915
Amp	3	124902689	124959693	0	0.012218	0.35412	0.032051
Amp	3	124960448	125617276	0	0.007735	0.315452	0.029915
Amp	3	125617591	128932352	0	0.003619	0.27973	0.027778
Amp	3	128933071	128944316	0	0.02313	0.46805	0.034188
Amp	3	128946947	133007031	0	0.003619	0.255463	0.032051
Amp	3	133013163	133436452	0	0.006834	0.325006	0.027778
Amp	3	133445989	133933896	0	0.009152	0.332956	0.029915
Amp	3	133934095	135160279	0	0.011518	0.368593	0.029915
Amp	3	135160433	136573437	0	0.0092	0.363384	0.027778
Amp	3	136577630	136594716	0	0.011813	0.422583	0.025641
Amp	3	136596046	136850472	0	0.012679	0.403317	0.027778
Amp	3	136850534	136850534	0	0.017374	0.437955	0.029915
Amp	3	136858550	137089328	0	0.021764	0.46323	0.032051
Amp	3	137089522	137245217	0	0.019151	0.426918	0.032051
Amp	3	137246204	137256363	0	0.014761	0.39905	0.029915
Amp	3	137256740	137302578	0	0.010067	0.361418	0.027778
Amp	3	137302591	137700774	0	0.0092	0.377194	0.025641
Amp	3	137700860	137805515	0	0.008101	0.360142	0.025641
Amp	3	137811645	137940131	0	0	0.255426	0.023504
Amp	3	137943252	138048612	0	0.010044	0.389921	0.025641
Amp	3	138129483	139543951	0	0	0.255426	0.023504
Amp	3	139546794	139631686	0	0.009223	0.379784	0.025641
Amp	3	139634765	139753646	0	0	0.258251	0.023504
Amp	3	139758342	139896081	0	0.002245	0.272528	0.025641
Amp	3	139897300	139915540	0	0.013575	0.385165	0.029915
Amp	3	139915978	139926668	0	0.002245	0.272528	0.025641
Amp	3	139933567	144029018	0	0	0.258251	0.023504
Amp	3	144036862	144423338	0	0.007543	0.366703	0.029915
Amp	3	144428084	144476836	0	0.008838	0.366016	0.032051
Amp	3	144479262	145252081	0	0.007543	0.324655	0.029915
Amp	3	145252412	145313943	0	0.008231	0.343188	0.034188
Amp	3	145314546	146091098	0	0.007543	0.310603	0.032051
Amp	3	146092423	147892751	0	0	0.231106	0.029915
Amp	3	147978864	148038912	0	0.001097	0.276242	0.032051
Amp	3	148042457	148515789	0	0	0.231106	0.029915
Amp	3	148523830	148534970	0	0.001044	0.298652	0.027778
Amp	3	148536465	148765823	0	0	0.248683	0.025641
Amp	3	148767043	148821497	0	0.000661	0.325251	0.023504
Amp	3	148826603	148881307	0	0	0.27507	0.021368
Amp	3	148882908	149037784	0	0.00058	0.266726	0.023504
Amp	3	149038074	149551879	0	0.002353	0.276377	0.025641
Amp	3	149553300	149567168	0	0.002953	0.317864	0.027778
Amp	3	149567744	150491018	0	0.002353	0.276377	0.025641
Amp	3	150494293	151379603	0	0.001772	0.28484	0.023504
Amp	3	151380984	151442860	0	0.002502	0.331088	0.025641
Amp	3	151447528	151765560	0	0.001772	0.28484	0.023504
Amp	3	151767737	151850903	0	0.002516	0.331302	0.025641
Amp	3	151855922	151868714	0	0.001772	0.28484	0.023504
Amp	3	151869354	152685236	0	0.002806	0.302325	0.023504
Amp	3	152685850	152693395	0	0.007292	0.354411	0.025641
Amp	3	152695967	152763625	0	0.004487	0.334369	0.023504
Amp	3	152763786	153932567	0	0	0.27507	0.021368
Amp	3	153934618	153958322	0	0.000547	0.323316	0.023504
Amp	3	153960074	154380934	0	0	0.27507	0.021368
Amp	3	154381279	154477108	0	0.000605	0.260297	0.023504
Amp	3	154478571	156692531	0	0	0.27507	0.021368
Amp	3	156695531	156777346	0	0.000607	0.302204	0.025641
Amp	3	156777992	157353851	0	0	0.27507	0.021368
Amp	3	157357799	158232818	0	0.000716	0.326179	0.023504
Amp	3	158237090	158333274	0	0	0.260231	0.023504
Amp	3	158342576	158509458	0	0.000559	0.247207	0.025641
Amp	3	158511087	158621752	0	0	0.260231	0.023504
Amp	3	158623833	158661383	0	0.001387	0.248416	0.027778
Amp	3	158664304	160562091	0	0	0.247467	0.025641
Amp	3	160564101	160718913	0	0.009419	0.360044	0.029915
Amp	3	160728467	160807009	0	0	0.252883	0.027778
Amp	3	160816623	160832191	0	0.000616	0.243007	0.029915
Amp	3	160837608	163371033	0	0	0.252883	0.027778
Amp	3	163371881	163622049	0	0.000721	0.218295	0.038462
Amp	3	163629842	164243324	0	0	0.222544	0.036325
Amp	3	164248283	165279087	0	0.004648	0.263959	0.038462
Amp	3	165279423	165454713	0	0.006075	0.266954	0.040598
Amp	3	165454985	165632588	0	0.01034	0.310353	0.040598
Amp	3	165638860	165698037	0	0.006075	0.268577	0.040598
Amp	3	165699205	166409613	0	0.004648	0.265672	0.038462
Amp	3	166411331	166461568	0	0.019019	0.414269	0.038462
Amp	3	166467420	166615185	0	0.014431	0.354926	0.040598
Amp	3	166623262	166794211	0	0.004648	0.257759	0.040598
Amp	3	166794791	166813155	0	0.01704	0.360194	0.042735
Amp	3	166816643	166816643	0	0.004648	0.257759	0.040598
Amp	3	166820707	166870271	0	0	0.219711	0.038462
Amp	3	166971222	168079857	0	0.00966	0.306861	0.040598
Amp	3	168082114	168214145	0	0.014022	0.352228	0.040598
Amp	3	168219731	168265031	0	0.021044	0.400045	0.042735
Amp	3	168271270	169666945	0	0.014022	0.352228	0.040598
Amp	3	169670656	169732280	0	0.023685	0.471944	0.036325
Amp	3	169739769	169739769	0	0.014022	0.383495	0.034188
Amp	3	169740411	169768944	0	0.010489	0.342391	0.034188
Amp	3	169772441	169846964	0	0	0.229899	0.032051
Amp	3	169847783	169959302	0	0.002449	0.245041	0.034188
Amp	3	169960157	169998140	0	0.01185	0.333554	0.036325
Amp	3	170001673	170010560	0	0.002449	0.245041	0.034188
Amp	3	170020109	170121829	0	0.012402	0.339598	0.036325
Amp	3	170141370	170188859	0	0.002449	0.245041	0.034188
Amp	3	170189383	170281072	0	0.003017	0.24418	0.036325
Amp	3	170281582	170877692	0	0.004012	0.241784	0.038462
Amp	3	170878013	172123100	0	0.003017	0.24418	0.036325
Amp	3	172128182	172748566	0	0.002449	0.240758	0.036325
Amp	3	172755459	173188153	0	0.003031	0.232284	0.040598
Amp	3	173188498	173287550	0	0.00648	0.242851	0.049145
Amp	3	173294482	174336115	0	0.009288	0.260942	0.051282
Amp	3	174340580	175319242	0	0.005839	0.24596	0.049145
Amp	3	175330411	175360729	0	0.00935	0.281431	0.044872
Amp	3	176041258	176112617	0	0.005839	0.262339	0.042735
Amp	3	176114086	176245258	0.02295	0.025394	0.423983	0.044872
Amp	3	176251332	176750104	0.060945	0.026381	0.432733	0.044872
Amp	3	176754078	177190887	0.198658	0.030905	0.503241	0.040598
Amp	3	177192759	177909710	0.060945	0.026381	0.471892	0.038462
Amp	3	177915249	178119433	0.139453	0.029124	0.45645	0.042735
Amp	3	178129394	178291205	1.02674	0.048771	0.60885	0.044872
Amp	3	178291645	178307940	1.23792	0.052295	0.59917	0.049145
Amp	3	178313576	178451112	2.23745	0.067462	0.691825	0.051282
Amp	3	178456520	178510585	1.23792	0.052295	0.59917	0.049145
Amp	3	178512147	178893025	1.02674	0.048771	0.586578	0.047009
Amp	3	178896944	179158102	1.00031	0.04819	0.633061	0.042735
Amp	3	179158368	179159818	1.11967	0.050397	0.621635	0.047009
Amp	3	179160068	179747058	1.05646	0.04941	0.612138	0.047009
Amp	3	179747641	179759282	0.946984	0.047202	0.621527	0.044872
Amp	3	179765238	179849828	0.98592	0.047829	0.630513	0.044872
Amp	3	179851059	180400882	1.01572	0.048456	0.569278	0.051282
Amp	3	180401582	180442045	1.13586	0.05072	0.563367	0.053419
Amp	3	180442710	180792658	1.01572	0.048456	0.569278	0.051282
Amp	3	180805966	180944656	1.2734	0.052689	0.579793	0.053419
Amp	3	180949777	181268797	1.39091	0.054629	0.590538	0.053419
Amp	3	181269358	181319488	1.4934	0.056295	0.580187	0.055556
Amp	3	181329453	181368910	1.65111	0.058729	0.576225	0.057692
Amp	3	181374102	181596970	2.02451	0.064234	0.59246	0.059829
Amp	3	181601188	181698497	2.18619	0.066857	0.609893	0.059829
Amp	3	181705432	181705432	2.35702	0.069388	0.628734	0.059829
Amp	3	181709143	181736201	2.04182	0.064581	0.596782	0.059829
Amp	3	181737731	181769327	1.9308	0.062916	0.606981	0.057692
Amp	3	181770447	181889140	1.77273	0.060481	0.593965	0.057692
Amp	3	181889874	181906179	1.4934	0.056248	0.584804	0.055556
Amp	3	181910133	182008179	1.37462	0.054308	0.592696	0.053419
Amp	3	182014139	182129555	0.337963	0.034753	0.465023	0.051282
Amp	3	182134284	182177377	0.439583	0.036925	0.465112	0.053419
Amp	3	182179188	182363088	0.402249	0.036227	0.478819	0.051282
Amp	3	182364895	182547026	0.664542	0.041408	0.498874	0.053419
Amp	3	182547858	182699321	0.402249	0.036227	0.478819	0.051282
Amp	3	182700205	182717751	0.439583	0.036829	0.510825	0.047009
Amp	3	182718773	182759171	0.474093	0.037817	0.498531	0.049145
Amp	3	182762121	182797078	0.450596	0.03719	0.492174	0.049145
Amp	3	182797321	182860872	0.337963	0.034659	0.471688	0.049145
Amp	3	182869433	183030707	0.515676	0.038535	0.503059	0.049145
Amp	3	183033623	183300824	0.337963	0.034659	0.503588	0.044872
Amp	3	183302022	184179380	0.307772	0.034032	0.542041	0.040598
Amp	3	184180057	184184700	0.503109	0.03833	0.555483	0.042735
Amp	3	184189144	184390100	0.460384	0.037343	0.572714	0.040598
Amp	3	184461455	184790313	0.551661	0.039402	0.560049	0.042735
Amp	3	184792013	184980246	0	0.019754	0.412847	0.038462
Amp	3	184980778	185102445	0	0.023958	0.432986	0.040598
Amp	3	185104271	185245317	0	0.019659	0.411993	0.038462
Amp	3	185247911	185488409	0	0.015456	0.389434	0.036325
Amp	3	185488929	185856343	0	0.013892	0.372307	0.036325
Amp	3	185862396	185990177	0	0.01329	0.39928	0.032051
Amp	3	185991881	186015516	0	0.014149	0.388059	0.034188
Amp	3	186019840	186225355	0	0.015699	0.411088	0.034188
Amp	3	186227048	186311358	0	0.012957	0.403807	0.032051
Amp	3	186313241	186442313	0	0.015875	0.412514	0.034188
Amp	3	186443121	186553200	0	0.014325	0.413228	0.032051
Amp	3	186555365	186796261	0	0.011407	0.40395	0.029915
Amp	3	186796863	186952810	0	0.010547	0.418119	0.027778
Amp	3	186954232	187176980	0	0.014799	0.42644	0.032051
Amp	3	187182766	187217650	0	0.010547	0.424725	0.027778
Amp	3	187219412	187244238	0	0.011149	0.41037	0.029915
Amp	3	187245342	188199107	0	0.010547	0.424725	0.027778
Amp	3	188202170	188474267	0	0.008375	0.401122	0.027778
Amp	3	188476329	188971715	0	0.006042	0.361562	0.027778
Amp	3	188976743	189318599	0	0.011822	0.396097	0.032051
Amp	3	189318672	189354096	0	0.010289	0.378122	0.032051
Amp	3	189357538	190393038	0	0.012932	0.4031	0.032051
Amp	3	190396945	190446737	0	0.010289	0.414052	0.027778
Amp	3	190447808	190764881	0	0.012868	0.450971	0.027778
Amp	3	190765012	191297139	0	0.010289	0.435651	0.025641
Amp	3	191299758	191626324	0	0.012107	0.44448	0.027778
Amp	3	191627134	191666260	0	0.010289	0.418459	0.027778
Amp	3	191677980	192040563	0	0.011282	0.401769	0.029915
Amp	3	192040620	192177648	0	0.014177	0.433461	0.029915
Amp	3	192302266	192302266	0	0.011282	0.419944	0.027778
Amp	3	192302511	192551538	0	0.010289	0.439539	0.025641
Amp	3	192552148	192585821	0	0.01168	0.425641	0.027778
Amp	3	192596666	192619174	0	0.012414	0.411419	0.029915
Amp	3	192626015	192816679	0	0.011023	0.423154	0.027778
Amp	3	192834671	192979753	0	0.012627	0.42294	0.029915
Amp	3	192986488	194105968	0	0.011023	0.401609	0.029915
Amp	3	194109471	196017117	0	0.010289	0.435177	0.025641
Amp	3	196019900	196120619	0	0.010852	0.399715	0.027778
Amp	3	196121261	196248054	0	0.011535	0.381046	0.029915
Amp	3	196248065	196339780	0	0.012757	0.370797	0.032051
Amp	3	196339931	196638894	0	0.014482	0.368628	0.034188
Amp	3	196639048	196641630	0	0.01326	0.37805	0.032051
Amp	3	196770477	196770477	0	0.013863	0.365169	0.034188
Amp	3	197242908	197243254	0	0.012138	0.367108	0.032051
Amp	3	197245963	197527360	0	0.011454	0.383447	0.029915
Amp	3	197527679	197812401	0	0.012548	0.357636	0.034188
Amp	4	1059384	1303781	0	0.012407	0.336862	0.040598
Amp	4	1306692	1306692	0	0.008815	0.305871	0.040598
Amp	4	1505243	1562193	0	0.013029	0.331949	0.042735
Amp	4	1581369	1587793	0.087213	0.027646	0.425508	0.047009
Amp	4	1617307	1662001	0.17979	0.030548	0.430936	0.049145
Amp	4	1662896	1663237	0.244173	0.032503	0.429568	0.051282
Amp	4	1664349	1777074	0.402249	0.036078	0.440075	0.053419
Amp	4	1790291	1802549	1.72737	0.05983	0.593182	0.055556
Amp	4	1814963	1818780	1.23792	0.052151	0.55866	0.053419
Amp	4	1820982	1859843	0.244173	0.032503	0.429568	0.051282
Amp	4	1860071	1973299	0.147829	0.029601	0.424317	0.049145
Amp	4	1981829	2077126	0.087213	0.027646	0.425508	0.047009
Amp	4	2079294	2108935	0	0.024199	0.41514	0.044872
Amp	4	2115870	2697928	0	0.013029	0.331949	0.042735
Amp	4	2700388	2831000	0	0.016219	0.351874	0.044872
Amp	4	2836036	3108143	0	0.017831	0.366163	0.044872
Amp	4	3109168	3198561	0	0.021995	0.384747	0.047009
Amp	4	3209369	3330752	0	0.02407	0.385133	0.049145
Amp	4	3337955	3378612	0	0.019856	0.367453	0.047009
Amp	4	3378948	3404188	0	0.017781	0.366207	0.044872
Amp	4	3405967	3559260	0	0.013617	0.345766	0.042735
Amp	4	3565137	3586020	0	0.017462	0.365431	0.044872
Amp	4	3593370	3647856	0	0.013617	0.345766	0.042735
Amp	4	3648200	3690391	0	0.017216	0.364009	0.044872
Amp	4	3690707	3704557	0	0.013617	0.345766	0.042735
Amp	4	3704679	3838039	0	0.013042	0.361995	0.040598
Amp	4	3838557	3844300	0	0.01747	0.390941	0.042735
Amp	4	3847605	3869335	0	0.015858	0.38784	0.040598
Amp	4	3873169	5308444	0	0.01143	0.344464	0.040598
Amp	4	5308576	5385258	0	0.00824	0.366765	0.032051
Amp	4	5386733	5408655	0	0.012345	0.394568	0.034188
Amp	4	5408775	5631961	0	0.00824	0.366765	0.032051
Amp	4	5634378	5706006	0.073993	0.026902	0.599462	0.032051
Amp	4	5709607	6108672	0	0.00824	0.367901	0.032051
Amp	4	6110413	6288799	0	0.009263	0.358545	0.034188
Amp	4	6289276	6343311	0	0.006294	0.34003	0.032051
Amp	4	6343842	6611908	0	0.005271	0.348731	0.029915
Amp	4	6611926	6628013	0	0.010363	0.363996	0.036325
Amp	4	6628468	7048650	0	0.005271	0.322819	0.034188
Amp	4	7054594	7298420	0	0.013333	0.416608	0.034188
Amp	4	7301021	7376031	0	0.007542	0.360967	0.032051
Amp	4	7377192	7917581	0	0.005271	0.332043	0.032051
Amp	4	7922643	7983977	0	0.010234	0.370715	0.034188
Amp	4	7985830	8444702	0	0.005271	0.332043	0.032051
Amp	4	8445536	8510145	0	0.00836	0.348834	0.034188
Amp	4	8533986	8704538	0	0.005813	0.319208	0.034188
Amp	4	9587686	9594294	0	0.008012	0.373601	0.029915
Amp	4	9594829	10167911	0	0.005886	0.371907	0.027778
Amp	4	10169481	10190391	0	0.007186	0.369835	0.029915
Amp	4	10190484	10338862	0	0.008032	0.359651	0.032051
Amp	4	10339795	10344926	0	0.007389	0.376386	0.029915
Amp	4	10345332	10466540	0	0.006543	0.392008	0.027778
Amp	4	10466844	10665262	0	0.003242	0.371333	0.025641
Amp	4	10668422	11788957	0	0.002585	0.361144	0.025641
Amp	4	11790383	12171045	0	0.006197	0.386675	0.027778
Amp	4	12175092	12327288	0	0.002585	0.354633	0.025641
Amp	4	12329132	12524718	0	0.005293	0.379015	0.027778
Amp	4	12531954	12561413	0	0.00775	0.427358	0.027778
Amp	4	12563675	12611543	0	0.01041	0.465429	0.027778
Amp	4	12618617	12624283	0	0.00775	0.422085	0.027778
Amp	4	12624525	12661355	0	0.005293	0.384757	0.027778
Amp	4	12668483	12947138	0	0.002585	0.366566	0.025641
Amp	4	12948032	13181211	0	0.003988	0.388332	0.025641
Amp	4	13182659	13868213	0	0.002585	0.36358	0.025641
Amp	4	13868735	13929367	0	0.008942	0.436601	0.027778
Amp	4	13932481	14842326	0	0.002585	0.345364	0.027778
Amp	4	14853888	14924429	0	0.004707	0.394608	0.025641
Amp	4	14924511	14947689	0	0.002585	0.349223	0.025641
Amp	4	14949765	15601997	0	0.001698	0.335457	0.025641
Amp	4	15611312	15750542	0	0.003502	0.368148	0.025641
Amp	4	15753476	15774558	0	0.006745	0.394431	0.027778
Amp	4	15780740	15848027	0	0.011044	0.425361	0.029915
Amp	4	15848363	16565625	0	0.006745	0.394431	0.027778
Amp	4	16574209	16683383	0	0.012759	0.461811	0.029915
Amp	4	16692092	17447280	0	0.006745	0.381859	0.029915
Amp	4	17448328	17476033	0	0.007959	0.386223	0.032051
Amp	4	17477384	17540421	0	0.006745	0.397671	0.029915
Amp	4	17540491	17549082	0	0.008289	0.418191	0.029915
Amp	4	17557985	17760683	0	0.004941	0.369545	0.029915
Amp	4	17763098	18082374	0	0.008456	0.390238	0.032051
Amp	4	18082496	18748995	0	0.005213	0.356126	0.032051
Amp	4	18749221	19371717	0	0.001698	0.332997	0.029915
Amp	4	19379555	19991841	0	0.00515	0.339663	0.034188
Amp	4	19993871	20474029	0	0.001698	0.317756	0.032051
Amp	4	20478700	20484119	0	0.003649	0.352971	0.032051
Amp	4	20484319	20971296	0	0.002628	0.340303	0.032051
Amp	4	20975801	21006433	0	0.00647	0.367078	0.034188
Amp	4	21006648	21100655	0	0.002628	0.342163	0.032051
Amp	4	21111426	21254649	0	0.019339	0.54951	0.032051
Amp	4	21255677	21525563	0	0.019936	0.525687	0.034188
Amp	4	21535545	21745555	0	0.022954	0.538769	0.036325
Amp	4	21749464	21754083	0	0.004292	0.333122	0.036325
Amp	4	21757534	21854318	0	0.014279	0.446018	0.036325
Amp	4	21856917	21865060	0	0.013682	0.46695	0.034188
[truncated: 20,789 more rows]
[truncated: 427 more columns]

## Sheet: Supplementary Table 4
Supplementary Table 4. cluster2 CNV of GISTIC.
Unique Name	Descriptor	Wide Peak Limits	Peak Limits	Region Limits	q values	Residual q values after removing segments shared with higher peaks	Broad or Focal	Amplitude Threshold	TCGA-S9-A6WM-01A-12D-A33S-01	TCGA-P5-A731-01A-11D-A32A-01	TCGA-FG-6692-01A-11D-1892-01	TCGA-FG-A87Q-01A-11D-A36N-01	TCGA-HT-A61C-01A-11D-A323-01	TCGA-S9-A6WN-01A-12D-A33S-01	TCGA-HT-8018-01A-11D-2391-01	TCGA-S9-A6UA-01A-12D-A33S-01	TCGA-DU-8165-01A-11D-2252-01	TCGA-HT-7485-01A-11D-2023-01	TCGA-HT-A5R5-01A-11D-A288-01	TCGA-DU-6405-01A-11D-1704-01	TCGA-FG-A4MU-01B-11D-A288-01	TCGA-CS-6290-01A-11D-1704-01	TCGA-DU-A7TJ-01A-11D-A34I-01	TCGA-P5-A5EU-01A-11D-A27J-01	TCGA-DH-5142-01A-01D-1466-01	TCGA-DH-5143-01A-01D-1466-01	TCGA-E1-5322-01A-01D-1466-01	TCGA-DU-A76L-01A-11D-A32A-01	TCGA-HT-7478-01A-11D-2023-01	TCGA-HW-A5KM-01A-11D-A27J-01	TCGA-HT-7691-01A-11D-2252-01	TCGA-KT-A7W1-01A-11D-A349-01	TCGA-CS-4942-01A-01D-1466-01	TCGA-TM-A84B-01A-11D-A36N-01	TCGA-DU-6404-01A-11D-1704-01	TCGA-HT-A5RA-01A-11D-A288-01	TCGA-DU-A7TD-01A-12D-A349-01	TCGA-DU-7300-01A-21D-2085-01	TCGA-E1-A7YJ-01A-11D-A349-01	TCGA-DU-7290-01A-11D-2023-01	TCGA-HT-7680-01A-11D-2252-01	TCGA-DU-7015-01A-11D-2023-01	TCGA-P5-A5EX-01A-12D-A288-01	TCGA-HT-A74K-01A-11D-A32A-01	TCGA-P5-A5EY-01A-11D-A27J-01	TCGA-S9-A7R7-01A-11D-A34I-01	TCGA-HW-7493-01A-11D-2023-01	TCGA-CS-4944-01A-01D-1466-01	TCGA-HT-8015-01B-11D-A288-01
Amplification Peak 1	1p36.21	chr1:12774145-15374619(probes 5617:7163)	chr1:13536256-14032311(probes 5672:6066)	chr1:13536256-14032860(probes 5672:6069)	0.049273	0.049273		0: t<0.1; 1: 0.1<t< 0.9; 2: t>0.9	1	0	0	0	0	0	0	0	1	0	0	0	0	0	0	0	0	0	0	0	0	0	0	0	0	0	0	0	0	0	0	0	0	0	0	0	0	0	0	0	0
Amplification Peak 2	1q23.1	chr1:156870577-158330515(probes 76668:77694)	chr1:156874279-156916587(probes 76669:76694)	chr1:156874279-157534014(probes 76669:77107)	0.055902	0.055902		0: t<0.1; 1: 0.1<t< 0.9; 2: t>0.9	1	0	0	0	0	0	0	1	1	0	0	0	0	0	0	0	0	0	0	0	0	1	0	0	0	1	0	0	0	0	1	1	0	1	0	0	0	0	0	0	0
Amplification Peak 3	1q32.1	chr1:204467054-204519462(probes 109050:109073)	chr1:204467393-204509301(probes 109051:109072)	chr1:202726292-205338660(probes 107865:109727)	3.354e-34	3.354e-34		0: t<0.1; 1: 0.1<t< 0.9; 2: t>0.9	1	0	1	0	0	0	0	1	1	0	0	0	0	0	0	0	0	0	0	0	0	0	0	0	0	1	0	0	2	0	0	1	0	1	0	0	0	0	0	0	0
Amplification Peak 4	2p25.2	chr2:4862331-4885469(probes 141873:141898)	chr2:4864013-4881630(probes 141874:141897)	chr2:4864013-4887123(probes 141874:141900)	0.16158	0.23132		0: t<0.1; 1: 0.1<t< 0.9; 2: t>0.9	0	0	0	0	0	0	0	0	1	0	1	0	0	0	0	0	0	0	0	0	0	0	0	0	0	0	0	0	0	0	0	0	0	0	0	0	0	0	0	0	0
Amplification Peak 5	2p25.2	chr2:4909600-5026973(probes 141921:141946)	chr2:4909755-5026756(probes 141922:141945)	chr2:4909755-5029297(probes 141922:141948)	0.16158	0.23132		0: t<0.1; 1: 0.1<t< 0.9; 2: t>0.9	0	0	0	0	0	0	0	0	1	0	1	0	0	0	0	0	0	0	0	0	0	0	0	0	0	0	0	0	0	0	0	0	0	0	0	0	0	0	0	0	0
Amplification Peak 6	2p25.2	chr2:5092124-5249528(probes 141994:142115)	chr2:5092253-5248514(probes 141995:142114)	chr2:5092253-5249853(probes 141995:142117)	0.16158	0.23132		0: t<0.1; 1: 0.1<t< 0.9; 2: t>0.9	0	0	0	0	0	0	0	0	1	0	1	0	0	0	0	0	0	0	0	0	0	0	0	0	0	0	0	0	0	0	0	0	0	0	0	0	0	0	0	0	0
Amplification Peak 7	2p25.2	chr2:5798455-5856109(probes 142604:142653)	chr2:5799482-5856050(probes 142605:142652)	chr2:5799482-5857016(probes 142605:142655)	0.16719	0.23902		0: t<0.1; 1: 0.1<t< 0.9; 2: t>0.9	0	0	0	0	0	0	0	0	1	0	1	0	0	0	0	0	0	0	0	0	0	0	0	0	0	0	0	0	0	0	0	0	0	0	0	0	0	0	0	0	0
Amplification Peak 8	3q26.31	chr3:173990942-174068882(probes 391291:391342)	chr3:173993433-174068576(probes 391292:391341)	chr3:171124429-174742455(probes 389675:391780)	0.0070519	0.060897		0: t<0.1; 1: 0.1<t< 0.9; 2: t>0.9	1	0	0	0	0	0	0	0	1	0	0	0	0	0	0	1	0	0	0	0	0	0	0	0	0	2	0	2	0	0	0	0	0	0	0	0	0	0	0	0	0
Amplification Peak 9	3q26.33	chr3:181406703-181577827(probes 395817:395899)	chr3:181415684-181573630(probes 395818:395898)	chr3:176972094-185638213(probes 393306:398130)	1.556e-05	7.0877e-05		0: t<0.1; 1: 0.1<t< 0.9; 2: t>0.9	1	0	0	0	0	0	0	0	1	0	0	0	0	0	0	2	0	0	0	0	0	0	0	0	0	2	0	2	0	0	0	0	0	0	0	0	0	0	0	0	0
Amplification Peak 10	4q12	chr4:48066810-52705510(probes 436449:436914)	chr4:52248689-52297036(probes 436691:436721)	chr4:48067891-56730805(probes 436450:439656)	9.8065e-09	0.029333		0: t<0.1; 1: 0.1<t< 0.9; 2: t>0.9	0	0	0	2	0	0	0	0	0	0	0	0	0	0	0	0	0	0	0	0	0	0	0	0	0	0	0	0	2	0	0	0	0	0	0	0	0	0	0	0	0
Amplification Peak 11	4q12	chr4:54274709-54286650(probes 437947:437968)	chr4:54274889-54285872(probes 437948:437967)	chr4:48067891-56730805(probes 436450:439656)	4.7354e-33	1.4907e-31		0: t<0.1; 1: 0.1<t< 0.9; 2: t>0.9	0	0	0	2	0	0	0	0	0	0	0	0	0	0	0	0	0	0	0	0	0	0	0	0	0	0	0	0	2	0	0	0	0	0	0	0	0	0	0	0	0
Amplification Peak 12	6p21.1	chr6:43724222-44096326(probes 657576:657801)	chr6:43724458-44009797(probes 657577:657746)	chr6:43724458-44097334(probes 657577:657803)	0.11279	0.11279		0: t<0.1; 1: 0.1<t< 0.9; 2: t>0.9	0	0	0	0	0	0	0	0	0	0	0	0	0	0	0	0	0	0	0	0	0	0	0	0	0	0	0	0	0	0	0	0	0	0	0	0	0	0	0	0	0
Amplification Peak 13	7p14.3	chr7:27886027-29499661(probes 752428:753473)	chr7:29118413-29127170(probes 753437:753438)	chr7:29118413-29133431(probes 753437:753441)	0.16158	0.16158		0: t<0.1; 1: 0.1<t< 0.9; 2: t>0.9	2	0	1	1	2	0	0	0	1	0	1	0	1	0	2	0	0	0	0	1	0	0	0	1	1	2	1	0	2	0	1	0	0	1	0	1	0	0	0	0	0
Amplification Peak 14	7p12.2	chr7:49994756-50011591(probes 767387:767391)	chr7:49996050-50002193(probes 767388:767390)	chr7:49962500-50136057(probes 767371:767455)	0.0077595	0.15619		0: t<0.1; 1: 0.1<t< 0.9; 2: t>0.9	2	0	1	0	1	0	0	0	1	0	1	0	1	0	2	0	0	0	0	1	0	0	0	1	1	2	1	0	2	0	2	0	0	1	0	1	0	0	0	0	0
Amplification Peak 15	7p12.1	chr7:52700825-52713778(probes 769482:769488)	chr7:52701906-52708261(probes 769483:769487)	chr7:51470652-63864599(probes 768487:772024)	2.5538e-09	0.0097113		0: t<0.1; 1: 0.1<t< 0.9; 2: t>0.9	2	0	1	0	1	0	0	0	1	0	1	0	1	0	2	0	0	0	0	1	0	0	0	1	1	2	1	0	2	0	0	0	0	1	0	1	0	0	0	0	0
Amplification Peak 16	7p11.2	chr7:54919185-54948806(probes 770937:770948)	chr7:54919501-54947653(probes 770938:770947)	chr7:51470652-63864599(probes 768487:772024)	1.2565e-193	5.9223e-92		0: t<0.1; 1: 0.1<t< 0.9; 2: t>0.9	2	0	2	2	1	0	0	0	1	0	1	2	2	0	2	0	1	0	0	2	0	0	0	2	1	2	1	2	2	0	2	0	0	1	0	1	0	0	0	1	0
Amplification Peak 17	7p11.2	chr7:55177672-55195273(probes 771278:771292)	chr7:55177815-55195176(probes 771279:771291)	chr7:51470652-63864599(probes 768487:772024)	1.0344e-191	9.5687e-80		0: t<0.1; 1: 0.1<t< 0.9; 2: t>0.9	2	0	2	2	1	0	0	0	1	0	1	2	2	0	2	0	1	0	0	2	0	0	0	2	1	2	1	2	2	0	2	0	0	1	0	1	0	0	0	1	0
Amplification Peak 18	7p11.2	chr7:56038071-56075061(probes 771727:771734)	chr7:56041812-56045370(probes 771728:771728)	chr7:51470652-63864599(probes 768487:772024)	3.2944e-28	0.041052		0: t<0.1; 1: 0.1<t< 0.9; 2: t>0.9	2	0	0	1	1	0	0	0	1	0	1	1	1	0	1	0	0	0	0	1	0	0	0	1	1	2	1	0	2	0	2	0	0	1	0	1	0	0	0	0	0
Amplification Peak 19	7p11.2	chr7:56634562-57130953(probes 771980:771982)	chr7:56636690-57130115(probes 771981:771981)	chr7:51470652-63864599(probes 768487:772024)	6.5732e-15	0.0065489		0: t<0.1; 1: 0.1<t< 0.9; 2: t>0.9	2	0	0	1	1	0	0	0	1	0	1	0	1	0	1	0	0	0	0	1	0	0	0	1	1	2	1	0	2	0	1	0	0	1	0	1	0	0	0	0	0
Amplification Peak 20	7q11.23	chr7:75777795-75976790(probes 777284:777360)	chr7:75789837-75971850(probes 777285:777359)	chr7:75682720-75977939(probes 777240:777362)	0.030062	0.062498		0: t<0.1; 1: 0.1<t< 0.9; 2: t>0.9	2	0	1	1	1	0	0	0	1	0	1	1	1	0	1	0	0	0	1	1	0	0	0	1	1	2	1	1	2	0	0	0	0	0	0	1	0	0	0	0	0
Amplification Peak 21	7q21.2	chr7:92611015-92798059(probes 787768:787994)	chr7:92611146-92797965(probes 787769:787993)	chr7:92059521-93146427(probes 787513:788247)	0.00040601	0.0032169		0: t<0.1; 1: 0.1<t< 0.9; 2: t>0.9	2	0	1	1	1	0	0	0	1	0	1	1	1	0	2	0	0	0	1	1	0	0	0	1	1	2	1	2	2	0	0	0	0	0	0	0	0	0	0	0	0
Amplification Peak 22	7q21.3	chr7:93857565-95084584(probes 788671:789369)	chr7:94474206-94633445(probes 789062:789141)	chr7:93363916-95118000(probes 788345:789390)	0.003857	0.041355		0: t<0.1; 1: 0.1<t< 0.9; 2: t>0.9	2	2	1	1	1	0	0	0	1	0	1	1	1	0	2	0	0	0	1	1	0	0	0	1	1	2	1	2	2	0	0	0	0	0	0	0	0	0	0	0	0
Amplification Peak 23	7q31.2	chr7:116740377-116751496(probes 801711:801726)	chr7:116740714-116751307(probes 801712:801725)	chr7:116643248-116945669(probes 801576:801884)	0.0065324	0.0065324		0: t<0.1; 1: 0.1<t< 0.9; 2: t>0.9	2	2	1	1	2	0	0	0	1	0	1	1	1	0	2	0	0	0	0	1	0	0	0	1	1	2	1	2	2	0	0	0	0	0	0	0	0	0	0	0	0
Amplification Peak 24	7q32.3	chr7:130510865-131974164(probes 809611:810539)	chr7:130986630-131126376(probes 809824:809923)	chr7:130850719-131586803(probes 809730:810223)	0.065616	0.065616		0: t<0.1; 1: 0.1<t< 0.9; 2: t>0.9	2	2	1	1	1	0	0	0	1	0	1	1	1	0	2	0	0	0	1	1	0	1	0	1	1	2	1	2	2	0	0	0	0	2	0	1	0	0	0	0	0
Amplification Peak 25	8q24.22	chr8:124367165-132680632(probes 906197:912244)	chr8:131685821-131753827(probes 911480:911535)	chr8:131685821-131755104(probes 911480:911538)	0.081376	0.081376		0: t<0.1; 1: 0.1<t< 0.9; 2: t>0.9	0	0	0	0	0	0	0	0	0	0	0	0	0	1	0	0	0	1	0	0	0	0	0	0	0	0	0	0	0	0	0	0	0	2	0	0	0	0	0	0	0
Amplification Peak 26	9q34.3	chr9:137489246-137572470(probes 993909:993930)	chr9:137489884-137572363(probes 993910:993929)	chr9:137489884-137576244(probes 993910:993932)	0.18315	0.18315		0: t<0.1; 1: 0.1<t< 0.9; 2: t>0.9	0	0	0	0	0	0	0	0	1	0	0	0	0	1	0	0	1	0	0	0	1	0	0	0	0	0	0	0	0	0	0	0	0	0	0	0	0	0	0	0	0
Amplification Peak 27	12p13.32	chr12:4265208-4327510(probes 1170207:1170283)	chr12:4265575-4324472(probes 1170208:1170282)	chr12:2867331-5638127(probes 1169165:1171462)	4.1598e-06	4.1598e-06		0: t<0.1; 1: 0.1<t< 0.9; 2: t>0.9	0	0	0	0	0	0	1	1	1	0	0	0	0	1	0	0	0	0	0	0	1	1	0	0	1	0	0	0	0	0	0	0	0	0	0	0	0	1	0	0	0
Amplification Peak 28	12q12	chr12:41389399-41425731(probes 1191758:1191804)	chr12:41389868-41425512(probes 1191759:1191803)	chr12:41387834-41565854(probes 1191749:1191926)	0.075019	0.075019		0: t<0.1; 1: 0.1<t< 0.9; 2: t>0.9	0	0	0	0	0	0	0	0	1	0	0	0	0	0	0	0	0	0	0	0	0	0	0	0	0	0	0	0	0	0	0	0	0	0	0	0	0	0	0	0	0
Amplification Peak 29	12q14.1	chr12:57731613-57750971(probes 1201193:1201198)	chr12:57731656-57750881(probes 1201194:1201197)	chr12:57174359-59041328(probes 1200964:1202164)	1.6496e-47	9.3956e-45		0: t<0.1; 1: 0.1<t< 0.9; 2: t>0.9	0	0	0	0	0	0	0	1	1	0	0	0	0	0	0	0	0	0	0	0	0	0	0	0	0	2	0	0	0	0	0	0	0	0	0	0	0	0	0	0	0
Amplification Peak 30	12q14.1	chr12:58176019-58191847(probes 1201480:1201495)	chr12:58176538-58191377(probes 1201481:1201494)	chr12:57174359-59041328(probes 1200964:1202164)	8.9991e-11	0.001394		0: t<0.1; 1: 0.1<t< 0.9; 2: t>0.9	0	0	0	0	0	0	0	1	1	0	0	0	0	0	0	0	0	0	0	0	0	0	0	0	0	0	0	0	0	0	0	0	0	0	0	0	0	0	0	0	0
Amplification Peak 31	12q14.1	chr12:58600324-58638005(probes 1201834:1201851)	chr12:58604293-58637961(probes 1201835:1201850)	chr12:57174359-59041328(probes 1200964:1202164)	3.0611e-08	0.00018633		0: t<0.1; 1: 0.1<t< 0.9; 2: t>0.9	0	0	0	0	0	0	0	1	1	0	0	0	0	0	0	0	0	0	0	0	0	0	0	0	0	0	0	0	0	0	0	0	0	0	0	0	0	0	0	0	0
Amplification Peak 32	12q14.1	chr12:61440969-61476492(probes 1203609:1203626)	chr12:61441131-61476289(probes 1203610:1203625)	chr12:61393877-61766296(probes 1203566:1203790)	0.0031112	0.011033		0: t<0.1; 1: 0.1<t< 0.9; 2: t>0.9	0	0	0	0	0	0	0	1	1	0	0	0	0	0	0	0	0	0	0	0	0	0	0	0	0	0	0	0	0	0	0	0	0	0	0	0	0	0	0	0	0
Amplification Peak 33	12q14.2	chr12:63214119-63247088(probes 1204803:1204826)	chr12:63215692-63246683(probes 1204804:1204825)	chr12:62900678-63377315(probes 1204565:1204908)	0.00064273	0.001785		0: t<0.1; 1: 0.1<t< 0.9; 2: t>0.9	0	0	0	0	0	0	0	1	1	0	0	0	0	0	0	0	0	0	0	0	0	0	0	0	0	0	0	0	0	0	0	0	0	0	0	0	0	0	0	0	0
Amplification Peak 34	12q14.2	chr12:64141936-64192528(probes 1205225:1205252)	chr12:64142346-64191565(probes 1205226:1205251)	chr12:64114183-64203798(probes 1205214:1205258)	0.0053731	0.014687		0: t<0.1; 1: 0.1<t< 0.9; 2: t>0.9	0	0	0	0	0	0	0	1	1	0	0	0	0	0	0	0	0	0	0	0	0	0	0	0	0	0	0	0	0	0	0	0	0	0	0	0	0	0	0	0	0
Amplification Peak 35	12q14.3	chr12:66831715-66860304(probes 1206869:1206900)	chr12:66831750-66860113(probes 1206870:1206899)	chr12:66778344-66860424(probes 1206828:1206902)	0.083648	0.1139		0: t<0.1; 1: 0.1<t< 0.9; 2: t>0.9	0	0	0	0	0	0	0	1	1	0	0	0	0	0	0	0	0	0	0	0	0	0	0	0	0	0	0	0	0	0	0	0	0	0	0	0	0	0	0	0	0
Amplification Peak 36	12q15	chr12:67466098-67561688(probes 1207376:1207439)	chr12:67471775-67560891(probes 1207377:1207438)	chr12:67436924-67576728(probes 1207350:1207447)	0.013127	0.017272		0: t<0.1; 1: 0.1<t< 0.9; 2: t>0.9	0	0	0	0	0	0	0	1	1	0	0	0	0	0	0	0	0	0	0	0	0	0	0	0	0	0	0	0	0	0	0	0	0	0	0	0	0	0	0	0	0
Amplification Peak 37	12q15	chr12:68142849-68154734(probes 1207883:1207889)	chr12:68143095-68154442(probes 1207884:1207888)	chr12:68109852-68202880(probes 1207857:1207937)	0.00064273	0.0008562		0: t<0.1; 1: 0.1<t< 0.9; 2: t>0.9	0	0	0	0	0	0	0	1	1	0	0	0	0	0	0	0	0	0	0	0	0	0	0	0	0	0	0	0	0	0	0	0	0	0	0	0	0	0	0	0	0
Amplification Peak 38	12q15	chr12:68345837-68638056(probes 1208079:1208273)	chr12:68453938-68500864(probes 1208173:1208198)	chr12:68345941-70588326(probes 1208080:1209596)	0.13813	0.18315		0: t<0.1; 1: 0.1<t< 0.9; 2: t>0.9	0	0	0	0	0	0	0	1	1	0	0	0	0	0	0	0	0	0	0	0	0	0	0	0	0	0	0	0	0	0	0	0	0	0	0	0	0	0	0	0	0
Amplification Peak 39	12q15	chr12:68778272-68876681(probes 1208348:1208432)	chr12:68780870-68866647(probes 1208349:1208425)	chr12:68345941-70588326(probes 1208080:1209596)	1.9573e-21	2.5763e-19		0: t<0.1; 1: 0.1<t< 0.9; 2: t>0.9	0	0	0	0	0	0	0	1	1	0	0	0	0	0	0	0	0	0	0	0	0	0	0	0	0	2	0	0	0	0	0	0	0	0	0	0	0	0	0	0	0
Amplification Peak 40	12q15	chr12:69630499-69648193(probes 1208933:1208946)	chr12:69630747-69647985(probes 1208934:1208945)	chr12:68345941-70588326(probes 1208080:1209596)	1.9362e-08	0.0050264		0: t<0.1; 1: 0.1<t< 0.9; 2: t>0.9	0	0	0	0	0	0	0	1	1	0	0	0	0	0	0	0	0	0	0	0	0	0	0	0	0	0	0	0	0	0	0	0	0	0	0	0	0	0	0	0	0
Amplification Peak 41	13q33.1	chr13:102946296-103086940(probes 1303428:1303563)	chr13:102946704-103086072(probes 1303429:1303562)	chr13:102946704-103088580(probes 1303429:1303565)	0.12562	0.20044		0: t<0.1; 1: 0.1<t< 0.9; 2: t>0.9	0	0	0	0	0	0	0	0	0	0	0	0	0	0	0	2	0	0	0	0	0	0	0	0	0	0	0	0	0	0	0	0	0	1	0	0	0	0	0	0	0
Amplification Peak 42	13q34	chr13:112027072-112077054(probes 1310196:1310214)	chr13:112031089-112076813(probes 1310197:1310213)	chr13:112031089-112081148(probes 1310197:1310216)	0.04618	0.069348		0: t<0.1; 1: 0.1<t< 0.9; 2: t>0.9	0	0	0	0	0	0	0	0	0	0	0	0	0	0	0	2	0	0	0	0	0	0	0	0	0	0	0	0	0	0	0	0	0	1	0	0	0	0	0	0	0
Amplification Peak 43	17q25.1	chr17:75434383-75465848(probes 1500564:1500579)	chr17:75440145-75465835(probes 1500565:1500578)	chr17:75279428-75824158(probes 1500480:1500705)	0.030984	0.030984		0: t<0.1; 1: 0.1<t< 0.9; 2: t>0.9	2	0	0	2	1	0	0	1	0	0	0	0	0	0	0	0	0	1	0	0	0	0	0	0	0	0	0	0	0	0	0	0	0	0	0	0	0	0	0	0	0
Amplification Peak 44	19q13.11	chr19:34581476-34634001(probes 1566724:1566754)	chr19:34583161-34633764(probes 1566725:1566753)	chr19:34583161-34644779(probes 1566725:1566756)	0.11772	0.1965		0: t<0.1; 1: 0.1<t< 0.9; 2: t>0.9	1	0	1	0	0	0	0	0	0	0	0	0	1	0	1	0	1	0	0	0	0	0	0	1	0	2	0	2	0	0	1	0	0	0	0	0	0	0	0	2	0
Amplification Peak 45	19q13.2	chr19:38897077-39092519(probes 1569031:1569088)	chr19:38897203-39092057(probes 1569032:1569087)	chr19:38873933-39094120(probes 1569027:1569090)	0.10449	0.17185		0: t<0.1; 1: 0.1<t< 0.9; 2: t>0.9	1	0	1	0	0	0	0	0	0	0	0	0	1	0	1	1	0	0	0	0	0	0	0	1	1	2	0	1	0	0	1	0	0	0	0	0	0	0	0	2	0
Deletion Peak 1	1p36.32	chr1:3641699-4416323(probes 154:702)	chr1:3680480-3937581(probes 178:322)	chr1:1-26448731(probes 1:13708)	3.0299e-07	0.0077078		0: t>-0.1; 1: -0.1>t> -1.3; 2: t< -1.3	0	1	0	0	1	1	0	0	0	0	0	1	0	0	0	0	0	0	0	0	0	0	0	0	0	0	0	0	0	1	0	1	0	0	1	1	0	0	0	0	0
Deletion Peak 2	1p36.23	chr1:7982677-8318933(probes 3164:3337)	chr1:8007369-8030167(probes 3172:3181)	chr1:1-26448731(probes 1:13708)	9.073e-24	3.9875e-20		0: t>-0.1; 1: -0.1>t> -1.3; 2: t< -1.3	1	1	1	1	1	1	0	0	0	0	0	1	0	0	0	0	0	0	0	0	0	0	0	0	0	0	0	1	0	1	1	1	0	0	1	1	0	0	0	0	0
Deletion Peak 3	1p36.12	chr1:21343567-21510440(probes 10847:10936)	chr1:21433303-21487009(probes 10897:10916)	chr1:1-26448731(probes 1:13708)	7.4364e-05	0.017529		0: t>-0.1; 1: -0.1>t> -1.3; 2: t< -1.3	0	0	0	1	1	1	0	0	0	0	0	1	0	0	0	0	0	0	0	0	0	0	0	1	0	0	0	0	0	1	0	1	0	0	1	1	0	0	0	0	0
Deletion Peak 4	1p35.3	chr1:3780043-43162304(probes 238:23042)	chr1:27829007-28286370(probes 14218:14446)	chr1:27217033-28399443(probes 13973:14499)	0.051388	0.20219		0: t>-0.1; 1: -0.1>t> -1.3; 2: t< -1.3	0	0	0	1	1	1	0	0	0	0	0	0	0	0	0	0	0	0	0	0	0	0	0	0	0	0	0	1	0	1	0	0	0	0	1	1	0	0	0	0	0
Deletion Peak 5	1p32.3	chr1:50414095-51063392(probes 27112:27385)	chr1:50949445-50976325(probes 27344:27348)	chr1:50529358-51112103(probes 27167:27396)	5.8709e-12	5.8709e-12		0: t>-0.1; 1: -0.1>t> -1.3; 2: t< -1.3	0	0	0	1	1	1	0	0	0	0	0	0	0	0	0	0	0	0	0	1	0	0	0	0	0	0	0	0	0	1	0	0	0	0	1	1	0	0	0	0	0
Deletion Peak 6	1q41	chr1:211674694-226871795(probes 114148:124406)	chr1:219910818-222597360(probes 119986:121793)	chr1:212124709-226095464(probes 114373:123940)	0.0044595	0.0044966		0: t>-0.1; 1: -0.1>t> -1.3; 2: t< -1.3	0	0	0	0	0	0	0	0	0	0	0	0	0	0	0	0	0	0	1	0	0	0	0	0	0	0	0	1	0	0	0	0	0	0	0	0	0	0	0	0	0
Deletion Peak 7	1q44	chr1:245701488-247036917(probes 137819:138177)	chr1:245748566-246884306(probes 137850:138102)	chr1:245592870-245973463(probes 137736:138065)	0.034373	0.033154		0: t>-0.1; 1: -0.1>t> -1.3; 2: t< -1.3	0	0	0	0	0	0	0	0	0	1	0	0	0	0	0	0	0	0	1	0	0	0	0	0	0	0	0	0	0	0	0	0	0	1	0	0	0	0	0	0	0
Deletion Peak 8	2p14	chr2:1-242193529(probes 138547:286658)	chr2:65306057-65440137(probes 183340:183428)	chr2:65374976-65375391(probes 183385:183386)	0.23415	0.23624		0: t>-0.1; 1: -0.1>t> -1.3; 2: t< -1.3	0	0	0	0	0	0	0	0	0	0	0	0	0	0	1	0	0	0	0	0	0	0	0	0	0	0	0	0	0	0	0	0	0	0	0	0	0	0	0	0	0
Deletion Peak 9	2q22.1	chr2:138898047-142880269(probes 222923:225565)	chr2:140223496-142136706(probes 223785:225119)	chr2:141278551-141282710(probes 224453:224454)	0.0076701	0.0077078		0: t>-0.1; 1: -0.1>t> -1.3; 2: t< -1.3	0	0	0	0	0	0	0	0	0	0	0	0	0	0	0	0	1	0	0	0	0	0	0	0	0	0	0	0	0	0	1	0	0	0	0	0	0	0	1	0	0
Deletion Peak 10	2q37.3	chr2:232328859-242193529(probes 280651:286658)	chr2:236320176-236512466(probes 283347:283429)	chr2:236247032-236847306(probes 283305:283660)	0.058539	0.057211		0: t>-0.1; 1: -0.1>t> -1.3; 2: t< -1.3	0	0	0	0	0	0	0	0	0	0	0	0	0	0	0	1	1	0	0	0	0	0	0	0	0	0	0	0	0	0	0	0	0	0	0	0	0	0	1	0	0
Deletion Peak 11	3q29	chr3:188946133-196049718(probes 400701:405141)	chr3:194576042-194595303(probes 404599:404604)	chr3:187728261-196551494(probes 399768:405382)	0.0010516	0.0010516		0: t>-0.1; 1: -0.1>t> -1.3; 2: t< -1.3	0	0	0	0	0	0	0	0	0	0	0	0	0	0	0	0	1	0	0	0	0	0	0	0	0	1	0	0	0	1	0	0	0	0	0	0	0	0	0	0	0
Deletion Peak 12	4q31.3	chr4:145677351-181161702(probes 492784:514309)	chr4:150572270-150588686(probes 495654:495655)	chr4:150541471-150746993(probes 495633:495721)	0.030956	0.10322		0: t>-0.1; 1: -0.1>t> -1.3; 2: t< -1.3	0	0	0	0	0	0	0	0	1	0	0	0	0	0	0	0	0	0	1	0	0	0	0	0	0	0	0	0	1	0	0	0	0	0	0	1	0	0	1	0	0
Deletion Peak 13	4q34.3	chr4:177990720-182139540(probes 512793:515130)	chr4:180603979-181161702(probes 514305:514309)	chr4:178358908-182428276(probes 513015:515377)	2.5881e-05	5.5051e-05		0: t>-0.1; 1: -0.1>t> -1.3; 2: t< -1.3	0	0	0	0	1	0	0	0	1	0	0	1	0	0	0	0	0	0	1	0	0	0	0	0	0	0	0	0	0	0	0	0	0	0	0	1	0	0	1	0	0
Deletion Peak 14	5q35.3	chr5:179669480-179704141(probes 628485:628505)	chr5:179678267-179681246(probes 628498:628499)	chr5:179676726-179681392(probes 628488:628501)	0.0095226	0.0097744		0: t>-0.1; 1: -0.1>t> -1.3; 2: t< -1.3	0	0	0	0	0	0	0	0	1	0	0	0	0	0	0	0	0	1	0	0	0	0	0	0	0	0	0	0	0	0	0	0	0	0	0	0	0	0	0	0	0
Deletion Peak 15	6p12.3	chr6:1-112072189(probes 629220:697371)	chr6:7979912-96840560(probes 635052:688089)	chr6:7897168-8058405(probes 634993:635110)	0.20724	0.20619		0: t>-0.1; 1: -0.1>t> -1.3; 2: t< -1.3	0	0	0	0	0	0	0	0	0	0	0	0	0	0	0	0	0	0	0	0	0	0	0	0	0	0	0	0	0	0	0	0	0	0	0	0	0	0	0	0	0
Deletion Peak 16	6q24.1	chr6:113933430-147577196(probes 698662:719518)	chr6:140678770-140687161(probes 715229:715230)	chr6:124780839-145604458(probes 704807:718323)	0.0056191	0.021052		0: t>-0.1; 1: -0.1>t> -1.3; 2: t< -1.3	0	0	1	0	0	0	0	0	0	0	0	1	0	0	0	1	0	0	1	0	0	0	0	0	0	0	0	0	0	0	0	0	0	0	0	0	0	0	0	1	0
Deletion Peak 17	6q26	chr6:163346930-163666898(probes 730485:730692)	chr6:163412504-163580459(probes 730536:730621)	chr6:161569485-170805979(probes 729386:734693)	3.6804e-07	9.3214e-07		0: t>-0.1; 1: -0.1>t> -1.3; 2: t< -1.3	0	0	0	0	0	0	0	0	0	0	0	1	0	0	0	1	0	0	1	0	0	0	0	0	0	0	0	0	0	0	1	0	0	0	0	0	0	0	0	1	0
Deletion Peak 18	8p23.2	chr8:2166023-6404670(probes 828220:832587)	chr8:2926897-4996752(probes 828315:830682)	chr8:4042755-4046725(probes 829499:829500)	0.048252	0.048252		0: t>-0.1; 1: -0.1>t> -1.3; 2: t< -1.3	1	0	0	0	0	0	0	0	1	0	0	0	0	0	1	1	1	0	0	0	0	0	0	0	0	0	0	0	0	0	0	0	0	0	0	0	0	0	0	0	0
Deletion Peak 19	9p24.3	chr9:1-12693402(probes 920161:928212)	chr9:840502-1540025(probes 920216:920355)	chr9:1-2024723(probes 920161:920876)	0.051823	0.15904		0: t>-0.1; 1: -0.1>t> -1.3; 2: t< -1.3	0	0	1	1	0	0	0	0	0	1	0	0	0	0	1	1	0	0	0	0	0	1	0	0	0	0	0	1	1	0	1	0	0	1	0	0	0	0	0	0	0
Deletion Peak 20	9p23	chr9:7799607-10617849(probes 925496:927620)	chr9:9769286-9823723(probes 927052:927053)	chr9:8716798-10063344(probes 926247:927173)	0.0042673	0.051602		0: t>-0.1; 1: -0.1>t> -1.3; 2: t< -1.3	0	0	1	1	0	0	0	0	0	1	0	1	1	0	1	1	0	0	0	0	0	1	0	1	0	0	0	1	1	0	1	0	0	1	0	0	0	0	0	0	0
Deletion Peak 21	9p21.3	chr9:19449173-21310588(probes 933830:935305)	chr9:20407937-20416453(probes 934614:934615)	chr9:16564566-33065151(probes 931432:942555)	2.4424e-30	0.10322		0: t>-0.1; 1: -0.1>t> -1.3; 2: t< -1.3	1	0	1	1	0	0	0	1	0	1	0	1	1	0	1	1	0	0	0	1	0	1	0	1	0	0	0	1	1	0	1	0	0	1	0	0	0	0	0	0	0
Deletion Peak 22	9p21.3	chr9:21865499-21997723(probes 935642:935706)	chr9:21959053-21997723(probes 935693:935706)	chr9:16564566-33065151(probes 931432:942555)	2.4878e-223	7.471e-188		0: t>-0.1; 1: -0.1>t> -1.3; 2: t< -1.3	1	0	1	1	1	0	0	1	0	1	0	1	1	0	1	1	0	0	0	1	0	1	0	1	0	0	0	1	1	0	1	0	0	1	0	0	0	0	0	0	0
Deletion Peak 23	9p21.3	chr9:22119130-23507724(probes 935814:936678)	chr9:22646075-22829484(probes 936119:936245)	chr9:16564566-33065151(probes 931432:942555)	2.8753e-94	0.0014438		0: t>-0.1; 1: -0.1>t> -1.3; 2: t< -1.3	1	0	1	1	0	0	0	1	0	1	0	1	1	0	1	1	0	0	0	1	0	1	0	1	0	0	0	1	1	0	1	0	0	1	0	0	0	0	0	0	0
Deletion Peak 24	9p21.3	chr9:22822675-25677216(probes 936245:938112)	chr9:23495186-23672515(probes 936678:936828)	chr9:16564566-33065151(probes 931432:942555)	6.0627e-72	0.0004512		0: t>-0.1; 1: -0.1>t> -1.3; 2: t< -1.3	0	0	1	1	0	0	0	1	0	1	0	1	1	0	1	1	0	0	0	1	0	1	0	1	0	0	0	1	1	0	1	0	0	1	0	0	0	0	0	0	0
Deletion Peak 25	9p21.2	chr9:24545214-26841185(probes 937388:938775)	chr9:26030589-26118859(probes 938352:938388)	chr9:16564566-33065151(probes 931432:942555)	7.5287e-50	4.0018e-05		0: t>-0.1; 1: -0.1>t> -1.3; 2: t< -1.3	0	0	1	1	0	0	0	1	0	1	0	0	1	0	1	1	0	0	0	0	0	1	0	0	0	0	0	1	1	0	1	0	0	1	0	0	0	0	0	0	0
Deletion Peak 26	9p21.2	chr9:27296708-27546829(probes 939103:939318)	chr9:27315626-27537801(probes 939119:939309)	chr9:16564566-33065151(probes 931432:942555)	4.3115e-27	0.054443		0: t>-0.1; 1: -0.1>t> -1.3; 2: t< -1.3	0	0	1	1	0	0	0	1	0	0	0	0	1	0	1	1	0	0	0	0	0	1	0	0	0	0	0	1	1	0	1	0	0	1	0	0	0	0	0	0	0
Deletion Peak 27	9p21.1	chr9:27572514-30389494(probes 939334:940736)	chr9:27944442-28981527(probes 939663:939979)	chr9:16564566-33065151(probes 931432:942555)	1.9784e-23	0.00010543		0: t>-0.1; 1: -0.1>t> -1.3; 2: t< -1.3	0	0	1	1	0	0	0	0	0	0	0	0	1	0	1	1	0	0	0	1	0	1	0	0	0	0	0	1	1	0	1	0	0	1	0	0	0	0	0	0	0
Deletion Peak 28	9p13.2	chr9:37033163-38394166(probes 944890:945733)	chr9:37584691-37905744(probes 945174:945371)	chr9:36448074-38608387(probes 944429:945901)	0.0052979	0.015278		0: t>-0.1; 1: -0.1>t> -1.3; 2: t< -1.3	0	0	1	1	0	0	0	0	0	0	0	0	0	0	0	0	0	0	0	0	0	0	0	0	0	0	0	1	1	0	0	0	0	1	0	0	0	0	0	0	0
Deletion Peak 29	10p15.2	chr10:1162887-4209266(probes 994651:997548)	chr10:3311103-3754376(probes 996766:997105)	chr10:3551322-3551994(probes 996936:996937)	0.10916	0.10739		0: t>-0.1; 1: -0.1>t> -1.3; 2: t< -1.3	1	0	1	1	1	0	0	1	1	0	0	1	1	0	1	0	0	0	0	1	0	0	0	1	0	1	0	1	1	0	1	1	0	0	0	0	0	0	0	0	0
Deletion Peak 30	10q23.31	chr10:87857401-88274281(probes 1052993:1053424)	chr10:87857645-87976150(probes 1052994:1053181)	chr10:87658974-88675736(probes 1052846:1053630)	8.0992e-21	3.1813e-17		0: t>-0.1; 1: -0.1>t> -1.3; 2: t< -1.3	1	0	1	1	1	0	0	0	1	0	0	1	1	0	1	0	0	0	0	1	0	0	0	1	0	1	0	1	1	0	1	1	0	0	0	0	0	0	0	0	0
Deletion Peak 31	10q23.31	chr10:87970891-88590152(probes 1053181:1053579)	chr10:88281559-88590152(probes 1053433:1053579)	chr10:87658974-88675736(probes 1052846:1053630)	1.597e-11	6.5092e-05		0: t>-0.1; 1: -0.1>t> -1.3; 2: t< -1.3	1	0	1	1	1	0	0	0	1	0	0	1	1	0	1	0	0	0	0	1	0	0	0	1	0	1	0	1	1	0	1	1	0	0	0	0	0	0	0	0	0
Deletion Peak 32	10q26.3	chr10:133376759-133797422(probes 1084115:1084131)	chr10:133376926-133797422(probes 1084117:1084131)	chr10:133182210-133797422(probes 1084071:1084131)	3.2777e-05	3.2777e-05		0: t>-0.1; 1: -0.1>t> -1.3; 2: t< -1.3	1	0	1	1	1	0	0	0	1	1	0	1	1	0	1	1	0	0	0	1	0	0	0	1	0	1	0	1	1	0	1	1	0	1	0	0	0	0	0	0	0
Deletion Peak 33	11p15.5	chr11:1-13280373(probes 1084132:1092999)	chr11:1660063-1883626(probes 1084559:1084628)	chr11:1-3726981(probes 1084132:1085421)	0.043345	0.04489		0: t>-0.1; 1: -0.1>t> -1.3; 2: t< -1.3	1	0	0	0	0	0	1	0	1	1	0	0	0	0	0	1	1	0	0	0	1	0	0	0	0	0	0	0	0	0	0	0	0	1	0	0	0	1	1	0	0
Deletion Peak 34	11q14.1	chr11:79436997-82734567(probes 1129601:1132105)	chr11:80748770-80765370(probes 1130625:1130629)	chr11:80538690-80822391(probes 1130484:1130654)	0.15991	0.15904		0: t>-0.1; 1: -0.1>t> -1.3; 2: t< -1.3	1	0	0	0	0	0	0	0	1	0	0	0	0	0	0	0	0	0	0	0	0	0	0	0	0	0	0	0	0	1	0	0	0	0	0	0	0	0	0	0	0
Deletion Peak 35	12q14.3	chr12:57779147-68675997(probes 1201222:1208294)	chr12:66339840-66683750(probes 1206503:1206750)	chr12:66369771-66895090(probes 1206517:1206930)	0.19686	0.20219		0: t>-0.1; 1: -0.1>t> -1.3; 2: t< -1.3	1	0	0	0	0	0	1	0	0	0	0	0	0	1	0	1	1	0	0	0	1	0	0	0	0	0	0	0	0	0	0	0	0	0	0	0	0	1	0	0	0
Deletion Peak 36	12q24.33	chr12:128243237-130792485(probes 1247357:1248535)	chr12:129312095-130592327(probes 1248359:1248360)	chr12:129312265-130593879(probes 1248360:1248361)	0.20619	0.20619		0: t>-0.1; 1: -0.1>t> -1.3; 2: t< -1.3	0	0	0	0	0	0	1	0	0	0	0	0	0	0	1	0	1	0	0	0	1	0	0	0	0	0	0	0	0	0	0	0	0	0	0	0	0	1	0	0	0
Deletion Peak 37	13q12.12	chr13:1-98453637(probes 1249523:1300130)	chr13:23468931-24003892(probes 1252165:1252221)	chr13:1-28153995(probes 1249523:1255387)	0.010136	0.14431		0: t>-0.1; 1: -0.1>t> -1.3; 2: t< -1.3	0	0	1	1	0	0	0	0	1	0	0	0	0	1	0	1	1	0	1	0	0	0	0	0	0	0	0	0	0	0	0	1	0	0	0	0	0	0	0	0	0
Deletion Peak 38	13q14.2	chr13:48301193-48490671(probes 1269651:1269880)	chr13:48301617-48486701(probes 1269652:1269878)	chr13:31317025-64373620(probes 1257730:1277954)	3.3773e-08	1.6748e-07		0: t>-0.1; 1: -0.1>t> -1.3; 2: t< -1.3	0	0	1	1	0	0	0	1	1	0	0	0	0	1	0	1	1	0	1	0	0	0	0	0	0	0	0	1	0	0	0	1	0	0	0	0	0	0	0	0	0
Deletion Peak 39	14q11.2	chr14:1-30561663(probes 1311329:1318070)	chr14:23955850-24054062(probes 1314016:1314039)	chr14:1-30341821(probes 1311329:1317955)	0.0006026	0.014932		0: t>-0.1; 1: -0.1>t> -1.3; 2: t< -1.3	1	0	0	0	1	0	0	0	1	0	0	0	0	0	0	0	1	0	1	1	0	0	0	0	0	0	0	1	0	0	0	0	0	0	0	0	0	0	0	0	0
Deletion Peak 40	14q13.1	chr14:32832643-33924794(probes 1319435:1320444)	chr14:32924537-33804537(probes 1319506:1320378)	chr14:30776766-34576752(probes 1318185:1320899)	1.7897e-05	0.00015504		0: t>-0.1; 1: -0.1>t> -1.3; 2: t< -1.3	1	0	0	0	1	0	0	0	1	0	0	0	0	0	0	0	1	0	1	1	0	0	0	0	0	0	0	0	0	0	0	1	0	0	0	0	0	0	0	0	0
Deletion Peak 41	14q21.2	chr14:35273858-59606763(probes 1321177:1336383)	chr14:44891999-44920462(probes 1326815:1326825)	chr14:44350433-45000394(probes 1326501:1326861)	0.036325	0.17065		0: t>-0.1; 1: -0.1>t> -1.3; 2: t< -1.3	1	0	0	0	1	0	0	0	1	0	0	0	0	0	0	0	1	0	1	1	0	0	0	0	0	0	0	0	0	0	0	1	0	0	1	0	0	0	0	0	0
Deletion Peak 42	14q24.2	chr14:62133966-99517086(probes 1337870:1363121)	chr14:73229250-73278678(probes 1345032:1345068)	chr14:72477045-74726574(probes 1344533:1345857)	0.027483	0.064455		0: t>-0.1; 1: -0.1>t> -1.3; 2: t< -1.3	1	0	0	0	1	0	0	0	1	0	0	0	0	0	0	1	1	1	1	1	0	0	0	0	1	0	0	0	0	0	0	1	0	0	1	0	0	0	0	1	0
Deletion Peak 43	14q32.2	chr14:68974290-107043718(probes 1342184:1365958)	chr14:99681208-99732598(probes 1363227:1363252)	chr14:99691455-99856088(probes 1363233:1363335)	0.092547	0.20619		0: t>-0.1; 1: -0.1>t> -1.3; 2: t< -1.3	1	0	0	0	1	0	0	0	1	0	0	0	0	0	0	1	1	0	1	0	0	0	0	0	1	0	0	0	0	0	0	1	0	0	1	0	0	0	0	0	0
Deletion Peak 44	15q15.1	chr15:36885487-43519644(probes 1373476:1377485)	chr15:41919071-41930956(probes 1376662:1376668)	chr15:28315871-59510556(probes 1369425:1387689)	4.3454e-06	0.025821		0: t>-0.1; 1: -0.1>t> -1.3; 2: t< -1.3	0	0	1	0	0	0	1	0	0	0	0	0	0	0	0	1	1	0	0	0	0	0	0	0	0	0	0	0	0	0	0	0	0	0	0	1	0	0	0	0	0
Deletion Peak 45	15q21.1	chr15:1-101991189(probes 1365959:1415656)	chr15:45508838-45616172(probes 1378362:1378392)	chr15:28315871-59510556(probes 1369425:1387689)	2.4472e-05	0.23624		0: t>-0.1; 1: -0.1>t> -1.3; 2: t< -1.3	0	0	1	0	0	0	1	0	0	0	0	0	0	0	0	1	1	0	0	0	0	0	0	0	0	0	0	0	0	0	0	0	0	0	0	1	0	0	0	0	0
Deletion Peak 46	15q21.1	chr15:1-101991189(probes 1365959:1415656)	chr15:45584310-45616172(probes 1378387:1378392)	chr15:28315871-59510556(probes 1369425:1387689)	2.2252e-05	0.25867		0: t>-0.1; 1: -0.1>t> -1.3; 2: t< -1.3	0	0	1	0	0	0	1	0	0	0	0	0	0	0	0	1	1	0	0	0	0	0	0	0	0	0	0	0	0	0	0	0	0	0	0	1	0	0	0	0	0
Deletion Peak 47	16p12.1	chr16:20352071-27207535(probes 1427357:1431158)	chr16:25689626-26138624(probes 1429868:1430273)	chr16:25914416-25918282(probes 1430071:1430072)	0.11859	0.11688		0: t>-0.1; 1: -0.1>t> -1.3; 2: t< -1.3	0	0	0	0	0	0	0	0	1	0	0	0	0	0	0	0	0	0	0	0	0	0	0	0	0	0	0	0	0	0	0	0	0	0	0	0	0	1	0	0	0
Deletion Peak 48	17q11.2	chr17:30999718-31395600(probes 1476070:1476233)	chr17:31092688-31381425(probes 1476110:1476229)	chr17:31181983-31332182(probes 1476146:1476207)	0.033003	0.031021		0: t>-0.1; 1: -0.1>t> -1.3; 2: t< -1.3	1	0	0	1	0	0	0	0	1	0	0	0	0	0	0	0	0	0	0	0	0	0	0	0	0	0	0	0	0	0	0	0	0	0	0	0	0	0	0	0	0
Deletion Peak 49	19q13.41	chr19:45392431-57121765(probes 1572012:1577519)	chr19:51684550-51754419(probes 1575021:1575065)	chr19:43989485-58617616(probes 1571215:1578282)	2.8771e-05	2.7652e-05		0: t>-0.1; 1: -0.1>t> -1.3; 2: t< -1.3	0	1	0	0	0	1	1	0	0	0	0	0	0	0	0	1	1	0	1	0	0	0	0	0	1	1	0	0	0	1	0	0	0	1	1	1	0	0	0	1	0
Deletion Peak 50	22q13.31	chr22:43995492-50818468(probes 1656865:1660840)	chr22:46004082-46091647(probes 1658369:1658406)	chr22:42013492-50818468(probes 1655575:1660840)	0.0001538	0.00015504		0: t>-0.1; 1: -0.1>t> -1.3; 2: t< -1.3	0	0	0	0	0	0	0	1	1	0	0	0	0	1	0	0	0	0	1	1	0	0	0	0	0	1	1	0	0	0	1	1	0	0	0	0	0	1	0	0	0
Amplification Peak 1 - CN values	1p36.21	chr1:12774145-15374619(probes 5617:7163)	chr1:13536256-14032311(probes 5672:6066)	chr1:13536256-14032860(probes 5672:6069)	0.049273	0.049273		Actual Copy Change Given	0.26122	0.034536	-0.0024938	-0.5348	-0.72279	-0.40804	0.023145	-0.049154	0.46639	-0.0053992	0.0033299	-0.39018	-0.035721	0.0015641	-0.043466	-0.06424	-0.010784	0.0048579	-0.081339	0.030029	0.0023581	0.00069327	-0.0018492	-0.025756	0.026654	0.027357	0.033508	-0.034223	0.048688	-0.6368	0.015447	0.037924	0.00081507	-0.0015243	-0.76141	-0.77414	-0.0010429	-0.019697	-0.0034695	-0.020824	-0.0015243
Amplification Peak 2 - CN values	1q23.1	chr1:156870577-158330515(probes 76668:77694)	chr1:156874279-156916587(probes 76669:76694)	chr1:156874279-157534014(probes 76669:77107)	0.055902	0.055902		Actual Copy Change Given	0.1437	0.0041632	-0.070001	0.0072217	0.067661	0.0051359	0.023145	0.21438	0.60593	0.019323	0.0033299	-0.016429	-0.0059522	0.0015641	-0.013127	0.021884	0.012795	0.0048579	-0.2201	0.004719	0.0023581	0.72357	-0.0018492	-0.0026322	0.0012481	0.52136	0.0013029	-0.119	0.0080567	0.018663	0.17468	0.44392	0	0.47118	0.030169	0.051387	-0.0010429	0.015866	0.0063871	-0.0051227	-0.00067843
Amplification Peak 3 - CN values	1q32.1	chr1:204467054-204519462(probes 109050:109073)	chr1:204467393-204509301(probes 109051:109072)	chr1:202726292-205338660(probes 107865:109727)	3.354e-34	3.354e-34		Actual Copy Change Given	0.15517	0.0041632	0.72206	0.00046683	0.094056	0.0051359	-0.020961	0.20335	0.6328	0.024689	0.0033299	-0.022469	-0.0059522	0.0015641	-0.013127	-0.077078	-0.0059522	0.0048579	-0.2201	0.004719	0.0023581	-0.0063668	-0.0018492	-0.0026322	0.0012481	0.54101	0.0013029	-0.038005	3.6569	0.0053806	0.021603	0.45394	-0.00025216	0.47118	0.05637	0.062937	-0.0010429	0.015866	0.00458	-0.0049844	-0.00067843
Amplification Peak 4 - CN values	2p25.2	chr2:4862331-4885469(probes 141873:141898)	chr2:4864013-4881630(probes 141874:141897)	chr2:4864013-4887123(probes 141874:141900)	0.16158	0.23132		Actual Copy Change Given	0.031436	0	0	-0.0036011	0.045708	-0.0044312	-0.014366	0.00458	0.2032	0.0065262	0.82275	0.0034687	0.020396	0.00013863	0.017824	-0.013815	0	-0.007472	-0.0016629	0	-0.030731	0.0013868	-0.0014337	0.0048579	-0.0019399	0.006109	-0.0037796	-0.0051227	0.0055529	-0.00041585	-0.017087	-0.0047079	-0.0020952	-0.087314	0.0022193	-0.0014053	-0.0064552	-0.027671	0	0	0
Amplification Peak 5 - CN values	2p25.2	chr2:4909600-5026973(probes 141921:141946)	chr2:4909755-5026756(probes 141922:141945)	chr2:4909755-5029297(probes 141922:141948)	0.16158	0.23132		Actual Copy Change Given	0.031436	0	0	-0.0036011	0.045708	-0.0044312	-0.014366	0.00458	0.2032	0.0065262	0.82275	0.0034687	0.020396	0.00013863	0.017824	-0.013815	0	-0.007472	-0.0016629	0	-0.030731	0.0013868	-0.0014337	0.0048579	-0.0019399	0.006109	-0.0037796	-0.0051227	0.0055529	-0.00041585	-0.017087	-0.0047079	-0.0020952	-0.087314	0.0022193	-0.0014053	-0.0064552	-0.027671	0	0	0
Amplification Peak 6 - CN values	2p25.2	chr2:5092124-5249528(probes 141994:142115)	chr2:5092253-5248514(probes 141995:142114)	chr2:5092253-5249853(probes 141995:142117)	0.16158	0.23132		Actual Copy Change Given	0.031436	0	0	-0.0036011	0.045708	-0.0044312	-0.014366	0.00458	0.2032	0.0065262	0.82275	0.0034687	0.020396	0.00013863	0.017824	-0.013815	0	-0.007472	-0.0016629	0	-0.030731	0.0013868	-0.0014337	0.0048579	-0.0019399	0.006109	-0.0037796	-0.0051227	0.0055529	-0.00041585	-0.017087	-0.0047079	-0.0020952	-0.087314	0.0022193	-0.0014053	-0.0064552	-0.027671	0	0	0
Amplification Peak 7 - CN values	2p25.2	chr2:5798455-5856109(probes 142604:142653)	chr2:5799482-5856050(probes 142605:142652)	chr2:5799482-5857016(probes 142605:142655)	0.16719	0.23902		Actual Copy Change Given	0.031436	0	0	-0.0036011	0.045708	-0.0044312	-0.014366	0.00458	0.2032	0.0065262	0.82275	0.0034687	0.020396	0.00013863	0.017824	-0.013815	0.08161	-0.007472	-0.0016629	0	-0.030731	0.0013868	-0.0014337	0.0048579	-0.0019399	0.006109	-0.0037796	-0.0051227	0.0055529	-0.00041585	-0.017087	-0.0047079	-0.0020952	0.00013863	0.0022193	-0.0014053	-0.0064552	-0.027671	0	0	0
Amplification Peak 8 - CN values	3q26.31	chr3:173990942-174068882(probes 391291:391342)	chr3:173993433-174068576(probes 391292:391341)	chr3:171124429-174742455(probes 389675:391780)	0.0070519	0.060897		Actual Copy Change Given	0.28929	-0.00027724	0.00458	-0.0011087	-0.020275	-0.0018481	-0.026577	0.00097064	0.15188	-0.0055245	0	0.016985	0.0049969	0.00069327	0.0049969	0.1022	-0.087314	0.0011093	0.013353	-0.0026322	-0.0066432	0.0040243	-0.0018492	0.0049969	-0.0045695	2.2205	-0.0062687	3.6569	-0.035585	-0.10211	0.042166	0.0011093	-0.0038571	-0.011959	-0.0084385	0.0051359	0.01158	-0.089037	0	0.013911	0.0035144
Amplification Peak 9 - CN values	3q26.33	chr3:181406703-181577827(probes 395817:395899)	chr3:181415684-181573630(probes 395818:395898)	chr3:176972094-185638213(probes 393306:398130)	1.556e-05	7.0877e-05		Actual Copy Change Given	0.28929	-0.00027724	0.00458	-0.0011087	0.016845	-0.0018481	-0.026577	0.00097064	0.15188	-0.0055245	0	0.023566	0.0049969	0.00069327	0.0049969	1.5174	-0.087314	0.0011093	0.013353	-0.0026322	-0.0066432	0.0040243	-0.0018492	0.0049969	-0.0045695	0.92777	-0.0062687	3.3428	0.011121	-0.10211	0.042166	0.0011093	-0.0038571	-0.011959	-0.0084385	0.0051359	0.01158	-0.089037	0	0.013911	0.0035144
Amplification Peak 10 - CN values	4q12	chr4:48066810-52705510(probes 436449:436914)	chr4:52248689-52297036(probes 436691:436721)	chr4:48067891-56730805(probes 436450:439656)	9.8065e-09	0.029333		Actual Copy Change Given	0.046275	-0.0055375	0.0040243	1.8568	0.016565	-0.0042929	0.0022193	0.0048579	-0.1935	-0.0024938	0.0020805	-0.0011087	0.0022193	-0.0037395	-0.0041546	0.016565	0.00022329	-0.0025559	0.0011093	-0.0060904	-0.010922	-0.00041585	-0.00046372	0.03031	-0.016567	-0.019862	-0.0079263	-0.005261	1.7903	-0.031086	0.013983	-0.020384	-0.0020952	-0.0060335	-0.020138	-0.32612	0.0033076	0.0023581	-0.0022168	0.021043	0.0029133
Amplification Peak 11 - CN values	4q12	chr4:54274709-54286650(probes 437947:437968)	chr4:54274889-54285872(probes 437948:437967)	chr4:48067891-56730805(probes 436450:439656)	4.7354e-33	1.4907e-31		Actual Copy Change Given	0.046275	-0.0055375	0.0040243	2.193	0.016565	-0.0042929	0.0022193	0.0048579	-0.1935	-0.0024938	0.0020805	-0.0011087	0.0022193	-0.0037395	-0.0041546	0.016565	0.00022329	-0.0025559	0.0011093	-0.0060904	-0.010922	-0.00041585	-0.00046372	0.03031	-0.016567	-0.019862	-0.0079263	-0.005261	1.7992	-0.031086	0.013983	-0.020384	-0.0020952	-0.0060335	-0.020138	-0.32612	0.0033076	0.0023581	0.086377	0.021043	0.0029133
Amplification Peak 12 - CN values	6p21.1	chr6:43724222-44096326(probes 657576:657801)	chr6:43724458-44009797(probes 657577:657746)	chr6:43724458-44097334(probes 657577:657803)	0.11279	0.11279		Actual Copy Change Given	-0.021647	-0.0035319	-0.0020784	-0.018353	0.023871	0.0043418	0.0052749	-0.018216	0	-0.00069303	-0.0060894	-0.013953	-0.049695	0	-0.085778	0.018803	0.010564	0	0.035242	-0.00069303	0.0012481	-0.00055444	0.0047671	-0.0055375	0.028763	0.017824	-0.0046097	-0.00072659	-0.00097017	0.043015	-0.034608	0	0.0002604	0.037217	0.069812	0.064457	-0.00035	0.0072217	-0.068931	0.0086135	0.0012481
Amplification Peak 13 - CN values	7p14.3	chr7:27886027-29499661(probes 752428:753473)	chr7:29118413-29127170(probes 753437:753438)	chr7:29118413-29133431(probes 753437:753441)	0.16158	0.16158		Actual Copy Change Given	1.3648	-0.0023553	0.76964	0.51751	0.90915	-0.0016629	0.013632	0.0051359	0.39845	0.0052749	0.25142	0.001983	0.81884	-0.00069303	0.94547	0.0558	0.008892	0.0075	0.012934	0.60341	0.00055459	-0.0020784	0.0043931	0.83707	0.70626	0.90694	0.51485	0.0084743	1.4219	0.0056596	0.8699	0.0069435	-0.0011256	0.74138	-0.010646	0.10555	0.013461	0.010703	0.04711	0.0085119	-0.00093392
Amplification Peak 14 - CN values	7p12.2	chr7:49994756-50011591(probes 767387:767391)	chr7:49996050-50002193(probes 767388:767390)	chr7:49962500-50136057(probes 767371:767455)	0.0077595	0.15619		Actual Copy Change Given	1.3648	-0.0023553	0.76964	-0.020824	0.69409	-0.0016629	0.015866	-0.0063668	0.39845	0.0052749	0.25142	-0.026049	0.81884	-0.00069303	0.94547	0.012097	0.008892	0.0075	0.012934	0.58428	0.00055459	-0.0020784	0.0043931	0.83707	0.70626	0.90053	0.51485	-0.0041919	1.4219	0.0056596	3.6569	0.0069435	-0.0011256	0.74138	-0.010646	0.10555	0.013461	0.0079175	0.04711	0.0085119	-0.00093392
Amplification Peak 15 - CN values	7p12.1	chr7:52700825-52713778(probes 769482:769488)	chr7:52701906-52708261(probes 769483:769487)	chr7:51470652-63864599(probes 768487:772024)	2.5538e-09	0.0097113		Actual Copy Change Given	1.3648	-0.0023553	0.76964	-0.020824	0.69409	-0.0016629	0.015866	-0.0063668	0.39845	0.0052749	0.36265	-0.026049	0.81884	-0.00069303	0.94547	0.012097	0.008892	0.0075	0.012934	0.58428	0.00055459	-0.0020784	0.0043931	0.77329	0.70626	0.90053	0.51485	-0.0041919	1.4006	0.0056596	0.0062481	0.0069435	-0.0026752	0.74138	-0.010646	0.10555	0.013461	0.0079175	0.04711	0.0085119	-0.00093392
Amplification Peak 16 - CN values	7p11.2	chr7:54919185-54948806(probes 770937:770948)	chr7:54919501-54947653(probes 770938:770947)	chr7:51470652-63864599(probes 768487:772024)	1.2565e-193	5.9223e-92		Actual Copy Change Given	3.6569	-0.0023553	3.6569	3.6569	0.69409	-0.0016629	0.015866	-0.0063668	0.39845	0.0052749	0.36265	3.6569	3.6569	-0.00069303	3.6569	0.012097	0.45888	0.0075	0.012934	1.3069	0.00055459	-0.0020784	0.0043931	3.6569	0.70626	0.90053	0.51485	3.6569	3.6569	0.0072217	3.6569	0.0069435	-0.0026752	0.74138	-0.010646	0.10555	0.013461	0.0079175	0.04711	0.24607	-0.00093392
Amplification Peak 17 - CN values	7p11.2	chr7:55177672-55195273(probes 771278:771292)	chr7:55177815-55195176(probes 771279:771291)	chr7:51470652-63864599(probes 768487:772024)	1.0344e-191	9.5687e-80		Actual Copy Change Given	3.6569	-0.0023553	3.6569	3.6569	0.69409	-0.0016629	0.015866	-0.0063668	0.39845	0.0052749	0.36265	3.6569	3.6569	-0.00069303	3.6569	0.012097	0.45888	0.0075	0.012934	1.3069	0.00055459	-0.0020784	0.0043931	3.6569	0.70626	0.90053	0.51485	3.6569	3.6569	0.0072217	3.6569	0.0069435	-0.0026752	0.74138	-0.010646	0.10555	0.013461	0.0079175	0.04711	0.24607	-0.00093392
Amplification Peak 18 - CN values	7p11.2	chr7:56038071-56075061(probes 771727:771734)	chr7:56041812-56045370(probes 771728:771728)	chr7:51470652-63864599(probes 768487:772024)	3.2944e-28	0.041052		Actual Copy Change Given	1.3336	-0.0023553	-0.030404	0.43369	0.69409	-0.0016629	0.015866	-0.0063668	0.39845	0.0052749	0.37117	0.62242	0.77791	-0.00069303	0.7835	0.012097	-0.025756	0.0075	0.012934	0.58793	0.00055459	-0.0020784	0.0043931	0.80111	0.70626	0.90053	0.51485	-0.02151	1.4079	0.0072217	3.6569	0.0069435	-0.0026752	0.74138	-0.010646	0.10555	0.013461	0.0079175	0.04711	-0.011611	-0.00093392
Amplification Peak 19 - CN values	7p11.2	chr7:56634562-57130953(probes 771980:771982)	chr7:56636690-57130115(probes 771981:771981)	chr7:51470652-63864599(probes 768487:772024)	6.5732e-15	0.0065489		Actual Copy Change Given	1.3336	-0.0023553	-0.030404	0.43369	0.69409	-0.0016629	0.015866	-0.0063668	0.39845	0.0052749	0.8279	-0.028765	0.77791	-0.00069303	0.7835	-0.044822	-0.025756	0.0075	0.012934	0.58793	0.00055459	-0.0020784	0.0043931	0.80111	0.70626	0.90053	0.51485	-0.02151	1.4079	0.0072217	0.84596	0.0069435	-0.0026752	0.74138	-0.010646	0.10555	0.013461	0.0079175	0.04711	-0.011611	-0.00093392
Amplification Peak 20 - CN values	7q11.23	chr7:75777795-75976790(probes 777284:777360)	chr7:75789837-75971850(probes 777285:777359)	chr7:75682720-75977939(probes 777240:777362)	0.030062	0.062498		Actual Copy Change Given	1.3383	-0.83373	0.60557	0.44816	0.7984	-0.0013858	0.015866	-0.0063668	0.39845	0.0052749	0.84376	0.53696	0.60828	-0.00069303	0.78292	-0.044822	-0.025756	0.0075	0.21791	0.58793	0.00055459	-0.0020784	0.00011074	0.80111	0.70626	0.90053	0.51485	0.76696	1.4079	0.0072217	0.00597	0.0069435	-0.012828	-0.035993	-0.010646	0.18162	0.013461	0.0079175	0.04711	-0.011611	-0.00093392
Amplification Peak 21 - CN values	7q21.2	chr7:92611015-92798059(probes 787768:787994)	chr7:92611146-92797965(probes 787769:787993)	chr7:92059521-93146427(probes 787513:788247)	0.00040601	0.0032169		Actual Copy Change Given	1.341	-0.010325	0.74024	0.48992	0.78157	-0.0013858	0.015866	0.05153	0.39845	0.0052749	0.84376	0.65756	0.82079	-0.00069303	0.94874	0.063223	0.026935	0.0075	0.21791	0.55089	0.00055459	-0.0020784	0.00011074	0.80111	0.70626	0.90053	0.51485	0.91016	1.4079	0.0072217	0.00597	0.0069435	0.0002604	0	-0.010646	0.091155	0.015793	0.0079175	0.081177	0.016425	-0.00093392
Amplification Peak 22 - CN values	7q21.3	chr7:93857565-95084584(probes 788671:789369)	chr7:94474206-94633445(probes 789062:789141)	chr7:93363916-95118000(probes 788345:789390)	0.003857	0.041355		Actual Copy Change Given	1.341	1.8095	0.74024	0.48992	0.78157	-0.0013858	0.015866	0.05153	0.39845	0.0052749	0.84376	0.72943	0.82079	-0.00069303	0.94874	0.063223	0.026935	0.0075	0.21791	0.55089	0.00055459	-0.0020784	0.00011074	0.80111	0.70626	0.90053	0.51485	0.91016	1.4079	0.0072217	0.00597	0.0069435	0.0002604	0	-0.010646	0.091155	0.015793	0.0079175	0.081177	0.016425	-0.00093392
Amplification Peak 23 - CN values	7q31.2	chr7:116740377-116751496(probes 801711:801726)	chr7:116740714-116751307(probes 801712:801725)	chr7:116643248-116945669(probes 801576:801884)	0.0065324	0.0065324		Actual Copy Change Given	1.3168	1.0067	0.75242	0.48992	3.6569	-0.0013858	0.015866	0.039337	0.39197	0.0052749	0.83605	0.69839	0.80305	-0.00069303	0.9742	0.071248	0.018803	0.087245	0.011679	0.55301	-0.041295	-0.0013858	0.00011074	0.81318	0.70626	0.90053	0.51485	0.9144	1.4079	0.0052884	0.00597	0.0069435	0.0002604	0	-0.010646	0.087534	0.015793	0.0079175	0.081177	0.016425	-0.00093392
Amplification Peak 24 - CN values	7q32.3	chr7:130510865-131974164(probes 809611:810539)	chr7:130986630-131126376(probes 809824:809923)	chr7:130850719-131586803(probes 809730:810223)	0.065616	0.065616		Actual Copy Change Given	1.2228	1.8113	0.69858	0.48992	0.82099	-0.0013858	0.015866	0.0073609	0.39197	0.0052749	0.87847	0.68999	0.80305	-0.00069303	0.90734	0.071248	0.018803	0.087245	0.23365	0.59134	0.003191	0.757	0.00011074	0.81318	0.70626	0.90053	0.51485	0.90936	1.4079	0.0052884	0.00597	0.0069435	0.0002604	1.8737	-0.010646	0.1428	0.015793	0.0079175	0.081177	0.016425	-0.00093392
Amplification Peak 25 - CN values	8q24.22	chr8:124367165-132680632(probes 906197:912244)	chr8:131685821-131753827(probes 911480:911535)	chr8:131685821-131755104(probes 911480:911538)	0.081376	0.081376		Actual Copy Change Given	-0.42822	-0.0037395	-0.017529	-0.0071958	-0.012438	-0.0034627	0.04883	0	-0.12056	0.0020805	0.026935	0.0041632	-0.0020784	0.34031	0.0029133	-0.007472	0.063223	0.24544	-0.0077482	-0.010232	0.05281	0.0013868	0.0018938	-0.00097017	-0.019286	0.00069327	-0.0064069	0	0.019783	-0.011335	0.035806	-0.029175	0.0034518	1.4364	0.018557	-0.0008316	0.0076442	0.023005	0.016088	-0.0030475	0.00041593
Amplification Peak 26 - CN values	9q34.3	chr9:137489246-137572470(probes 993909:993930)	chr9:137489884-137572363(probes 993910:993929)	chr9:137489884-137576244(probes 993910:993932)	0.18315	0.18315		Actual Copy Change Given	0.0094491	0.0066653	-0.037082	0.00097064	0.032281	0.0084743	0	-0.046989	0.38403	0	-0.00027724	-0.0053992	-0.053611	0.39313	-0.064777	-0.041838	0.38122	-0.0037395	0.05523	0.032704	0.44986	-0.0015243	0.00078404	-0.043195	0.013353	0.0114	0.065901	-0.29591	-0.73652	0.043299	-0.1025	0.0066653	-0.0022337	-0.010094	0.081177	-0.017254	-0.006992	-0.0032283	0	-0.028901	0.022164
Amplification Peak 27 - CN values	12p13.32	chr12:4265208-4327510(probes 1170207:1170283)	chr12:4265575-4324472(probes 1170208:1170282)	chr12:2867331-5638127(probes 1169165:1171462)	4.1598e-06	4.1598e-06		Actual Copy Change Given	-0.10644	0.0056919	0.0058309	-0.0012473	0.043582	0.0029133	0.33593	0.28691	0.15203	-0.0062286	-0.00041585	-0.020961	-0.0076101	0.1646	-0.017058	0.036512	0.015556	0.0065262	0.0044411	0.017684	0.51961	0.73986	-0.00060231	-0.0095426	0.10322	0.00097064	0.015686	-0.0042929	-0.005261	0.020763	0.0023664	0.010982	-0.0019567	-0.0012473	0.042732	-0.0066432	-0.0021511	0.61118	0.0016642	-0.024661	-0.0001033
Amplification Peak 28 - CN values	12q12	chr12:41389399-41425731(probes 1191758:1191804)	chr12:41389868-41425512(probes 1191759:1191803)	chr12:41387834-41565854(probes 1191749:1191926)	0.075019	0.075019		Actual Copy Change Given	-0.11939	0.0056919	0.0058309	-0.0012473	-0.010922	0.0029133	-0.2554	0.001803	0.74366	-0.027945	-0.00041585	0.0055529	-0.0076101	-0.12174	0.008892	-0.87385	-0.12836	-0.043873	0.0044411	-0.0056757	-0.57887	-0.005261	-0.0030187	-0.0095426	-0.00027724	0.00097064	-0.011651	-0.0042929	-0.005261	-0.0013858	0.0023664	0.0043526	-0.0019567	-0.0012473	-0.0012186	-0.036265	0	-0.51743	-0.086651	0.012795	-0.0001033
Amplification Peak 29 - CN values	12q14.1	chr12:57731613-57750971(probes 1201193:1201198)	chr12:57731656-57750881(probes 1201194:1201197)	chr12:57174359-59041328(probes 1200964:1202164)	1.6496e-47	9.3956e-45		Actual Copy Change Given	-0.14335	0.0037465	-0.041295	-0.0012473	0.048972	0.0029133	-0.2554	0.46656	0.161	-0.027945	-0.00041585	-0.028765	-0.0076101	-0.12174	-0.054555	-0.87385	-0.10867	-0.043873	0.0044411	-0.0056757	-0.57887	-0.005261	-0.0030187	-0.0095426	-0.00027724	3.6569	0.0017994	-0.11077	-0.005261	-0.0013858	0.0023664	0.0043526	-0.0019567	-0.0012473	0.053948	-0.037626	0	-0.51743	-0.086651	0.012795	-0.0001033
Amplification Peak 30 - CN values	12q14.1	chr12:58176019-58191847(probes 1201480:1201495)	chr12:58176538-58191377(probes 1201481:1201494)	chr12:57174359-59041328(probes 1200964:1202164)	8.9991e-11	0.001394		Actual Copy Change Given	-0.14335	0.0037465	-0.0011087	-0.0012473	0.048972	0.0029133	-0.2554	0.46656	0.161	-0.027945	-0.00041585	-0.028765	-0.0076101	-0.12174	0.0041632	-0.87385	-0.10867	-0.043873	0.0044411	-0.0056757	-0.57887	-0.005261	-0.0030187	-0.0095426	-0.00027724	-0.0123	0.0017994	-0.0019399	-0.005261	-0.0013858	0.0023664	0.0043526	-0.0019567	-0.0012473	-0.0085766	-0.037626	0	-0.51743	-0.086651	0.012795	-0.0001033
Amplification Peak 31 - CN values	12q14.1	chr12:58600324-58638005(probes 1201834:1201851)	chr12:58604293-58637961(probes 1201835:1201850)	chr12:57174359-59041328(probes 1200964:1202164)	3.0611e-08	0.00018633		Actual Copy Change Given	-0.14335	0.0037465	-0.0011087	-0.0012473	0.048972	0.0029133	-0.2554	0.46656	0.161	-0.027945	-0.00041585	0.0010893	-0.0076101	-0.12174	0.0041632	-0.87385	-0.10867	-0.043873	0.0044411	-0.0056757	-0.57887	-0.005261	-0.0030187	-0.0095426	-0.00027724	-0.0123	0.0017994	-0.0019399	-0.005261	-0.0013858	0.0023664	0.0043526	-0.0019567	-0.0012473	-0.0085766	-0.037626	0	-0.51743	-0.086651	0.012795	-0.0001033
Amplification Peak 32 - CN values	12q14.1	chr12:61440969-61476492(probes 1203609:1203626)	chr12:61441131-61476289(probes 1203610:1203625)	chr12:61393877-61766296(probes 1203566:1203790)	0.0031112	0.011033		Actual Copy Change Given	-0.14335	0.0037465	-0.0011087	-0.0012473	-0.054016	0.0029133	-0.2554	0.46656	0.161	-0.027945	-0.00041585	0.0010893	-0.0076101	-0.11809	0.0041632	-0.87385	-0.10867	-0.043873	0.0044411	-0.0056757	-0.57887	-0.005261	-0.0030187	-0.0095426	-0.00027724	-0.01918	0.0017994	-0.0019399	-0.005261	-0.0013858	0.0023664	0.0043526	-0.0019567	-0.0012473	-0.0085766	-0.037626	0	-0.51743	-0.086651	0.012795	-0.0001033
Amplification Peak 33 - CN values	12q14.2	chr12:63214119-63247088(probes 1204803:1204826)	chr12:63215692-63246683(probes 1204804:1204825)	chr12:62900678-63377315(probes 1204565:1204908)	0.00064273	0.001785		Actual Copy Change Given	-0.14335	0.0037465	-0.0011087	-0.0012473	-0.0016629	0.0029133	-0.2554	0.46656	0.161	-0.027945	-0.00041585	0.0010893	-0.0076101	-0.11809	0.0041632	-0.87385	-0.1774	-0.043873	0.0044411	-0.0056757	-0.57887	-0.005261	-0.0030187	-0.0095426	-0.00027724	-0.01918	0.0017994	-0.0019399	-0.005261	-0.0013858	0.0023664	0.0043526	-0.0019567	-0.0012473	-0.0085766	-0.037626	0	-0.51743	-0.086651	0.012795	-0.0001033
Amplification Peak 34 - CN values	12q14.2	chr12:64141936-64192528(probes 1205225:1205252)	chr12:64142346-64191565(probes 1205226:1205251)	chr12:64114183-64203798(probes 1205214:1205258)	0.0053731	0.014687		Actual Copy Change Given	-0.14335	0.0037465	-0.0011087	-0.0012473	-0.0016629	0.0029133	-0.2554	0.46656	0.161	-0.027945	-0.00041585	0.0010893	-0.0076101	-0.11809	0.0041632	-0.87385	-0.1774	-0.043873	0.0044411	-0.0056757	-0.57887	-0.005261	-0.0030187	-0.0095426	-0.00027724	-0.01918	0.0017994	-0.0019399	-0.005261	-0.0013858	0.0023664	0.0043526	-0.0019567	-0.0012473	-0.0085766	-0.037626	0	-0.51743	-0.086651	0.012795	-0.0001033
Amplification Peak 35 - CN values	12q14.3	chr12:66831715-66860304(probes 1206869:1206900)	chr12:66831750-66860113(probes 1206870:1206899)	chr12:66778344-66860424(probes 1206828:1206902)	0.083648	0.1139		Actual Copy Change Given	-0.14335	0.0037465	-0.0011087	-0.0012473	-0.0016629	0.0029133	-0.2554	0.46656	0.161	-0.027945	-0.00041585	0.0010893	-0.0076101	-0.11809	0.0041632	-0.87385	-0.13083	-0.043873	0.0044411	-0.0056757	-0.57887	-0.005261	-0.0030187	-0.0095426	-0.00027724	-0.01918	0.0017994	-0.0019399	-0.005261	-0.0013858	0.0023664	0.0043526	-0.0019567	-0.0012473	-0.0085766	-0.037626	0	-0.51743	-0.086651	0.012795	-0.0001033
Amplification Peak 36 - CN values	12q15	chr12:67466098-67561688(probes 1207376:1207439)	chr12:67471775-67560891(probes 1207377:1207438)	chr12:67436924-67576728(probes 1207350:1207447)	0.013127	0.017272		Actual Copy Change Given	-0.14335	0.0037465	-0.0011087	-0.0012473	-0.0016629	0.0029133	-0.2554	0.46656	0.161	-0.027945	-0.00041585	0.0010893	-0.0076101	-0.11809	0	-0.87385	-0.13083	-0.043873	0.0044411	-0.0056757	-0.57887	-0.005261	-0.0030187	-0.0095426	-0.00027724	-0.01918	0.0017994	-0.0019399	-0.005261	-0.0013858	0.0023664	0.0043526	-0.0019567	-0.0012473	-0.0085766	-0.037626	0	-0.51743	-0.086651	0.012795	-0.0001033
Amplification Peak 37 - CN values	12q15	chr12:68142849-68154734(probes 1207883:1207889)	chr12:68143095-68154442(probes 1207884:1207888)	chr12:68109852-68202880(probes 1207857:1207937)	0.00064273	0.0008562		Actual Copy Change Given	-0.14335	0.0037465	-0.0011087	-0.0012473	-0.0016629	0.0029133	-0.2554	0.46656	0.161	-0.027945	-0.00041585	0.0010893	-0.0076101	-0.11809	0	-0.87385	-0.13083	-0.043873	0.0044411	-0.0056757	-0.57887	-0.005261	-0.0030187	-0.0095426	-0.00027724	-0.01918	0.0017994	-0.0019399	-0.005261	-0.0013858	0.0023664	0.0043526	-0.0019567	-0.0012473	-0.0085766	-0.037626	0	-0.51743	-0.086651	0.012795	-0.0001033
Amplification Peak 38 - CN values	12q15	chr12:68345837-68638056(probes 1208079:1208273)	chr12:68453938-68500864(probes 1208173:1208198)	chr12:68345941-70588326(probes 1208080:1209596)	0.13813	0.18315		Actual Copy Change Given	-0.14335	0.0037465	-0.0011087	-0.0012473	-0.0016629	0.0029133	-0.2554	0.46656	0.161	-0.027945	-0.00041585	0.0010893	-0.0076101	-0.11809	0	-0.87385	-0.13083	-0.043873	0.0044411	-0.0056757	-0.57887	-0.005261	-0.0030187	-0.0095426	-0.00027724	-0.01918	0.0017994	-0.0019399	-0.005261	-0.0013858	0.0023664	0.0043526	-0.0019567	-0.0012473	-0.0085766	-0.037626	0	-0.51743	-0.086651	0.012795	-0.0001033
Amplification Peak 39 - CN values	12q15	chr12:68778272-68876681(probes 1208348:1208432)	chr12:68780870-68866647(probes 1208349:1208425)	chr12:68345941-70588326(probes 1208080:1209596)	1.9573e-21	2.5763e-19		Actual Copy Change Given	-0.14335	0.0037465	-0.0011087	-0.0012473	-0.0016629	0.0029133	-0.2554	0.46656	0.161	-0.027945	-0.00041585	0.0010893	-0.0076101	-0.11809	0	-0.87385	-0.13083	-0.043873	0.0044411	-0.0056757	-0.57887	-0.005261	-0.0030187	-0.0095426	-0.00027724	2.8615	0.0017994	-0.0019399	-0.005261	-0.0013858	0.0023664	0.0043526	-0.0019567	-0.0012473	-0.0085766	-0.037626	0	-0.51743	-0.086651	0.012795	-0.0001033
Amplification Peak 40 - CN values	12q15	chr12:69630499-69648193(probes 1208933:1208946)	chr12:69630747-69647985(probes 1208934:1208945)	chr12:68345941-70588326(probes 1208080:1209596)	1.9362e-08	0.0050264		Actual Copy Change Given	-0.14335	0.0037465	-0.0011087	-0.0012473	-0.0016629	0.0029133	-0.2554	0.46656	0.161	-0.027945	-0.00041585	0.0010893	-0.0076101	-0.11809	0	-0.87385	-0.13083	-0.043873	0.0044411	-0.0056757	-0.57887	-0.005261	-0.0030187	-0.0095426	-0.00027724	0.029325	0.0017994	-0.0019399	-0.005261	-0.0013858	0.0023664	0.0043526	-0.0019567	-0.0012473	-0.0085766	-0.037626	0	-0.51743	-0.086651	0.012795	-0.0001033
Amplification Peak 41 - CN values	13q33.1	chr13:102946296-103086940(probes 1303428:1303563)	chr13:102946704-103086072(probes 1303429:1303562)	chr13:102946704-103088580(probes 1303429:1303565)	0.12562	0.20044		Actual Copy Change Given	0.052952	-0.020549	-0.23728	-0.51527	0.022164	-0.011314	-0.045364	-0.49172	-0.38259	0.0095883	-0.0038779	-0.0092666	-0.0011087	-0.1329	-0.00097017	1.0055	0.030451	-0.034086	-0.29485	-0.0045695	-0.010784	0	-0.0007409	0	-0.0073339	-0.030131	-0.0028712	0.017684	0.0026357	-0.0053992	-0.065045	-0.66615	-0.0041714	0.74499	-0.020549	0.086377	-0.0074064	-0.024524	-0.0078863	0.0073609	-0.0060342
Amplification Peak 42 - CN values	13q34	chr13:112027072-112077054(probes 1310196:1310214)	chr13:112031089-112076813(probes 1310197:1310213)	chr13:112031089-112081148(probes 1310197:1310216)	0.04618	0.069348		Actual Copy Change Given	0.052952	-0.020549	-0.23728	-0.51527	0.025952	-0.011314	-0.045364	-0.49172	-0.37932	0.0095883	-0.0038779	-0.052396	-0.0011087	-0.14101	-0.020138	0.99591	0.030451	-0.034086	-0.29485	-0.0045695	-0.010784	0	-0.0007409	0	-0.0073339	0.0091705	0.0052345	-0.019726	0.0026357	-0.0053992	-0.065045	-0.66615	-0.0041714	0.74499	0.01447	0.086377	-0.0074064	-0.024524	-0.0078863	0.0073609	-0.0060342
Amplification Peak 43 - CN values	17q25.1	chr17:75434383-75465848(probes 1500564:1500579)	chr17:75440145-75465835(probes 1500565:1500578)	chr17:75279428-75824158(probes 1500480:1500705)	0.030984	0.030984		Actual Copy Change Given	3.6569	0.015894	-0.067508	2.0206	0.62897	0.026795	-0.015329	0.37759	-0.21515	0.010006	-0.00075325	-0.036674	-0.091607	0.010982	-0.10579	-0.012438	-0.1233	0.32157	0.010982	0.023005	0.016006	-0.0042929	0.00078404	-0.061152	0.015308	0.0085784	0.023666	-0.12629	0.026233	0.020763	-0.06652	-0.011749	-0.0034796	0.044148	0.078582	0.091445	-0.0025665	-0.00055444	-0.010232	-0.016704	-0.0056757
Amplification Peak 44 - CN values	19q13.11	chr19:34581476-34634001(probes 1566724:1566754)	chr19:34583161-34633764(probes 1566725:1566753)	chr19:34583161-34644779(probes 1566725:1566756)	0.11772	0.1965		Actual Copy Change Given	0.27931	0.017824	0.7117	-0.012851	0.018243	-0.39842	-0.1246	-0.051586	0.037217	0.0093098	0.0036076	-0.05299	0.64158	0.011958	0.34096	-0.67472	0.57202	0.0081959	-0.80177	0.020186	-0.00027724	-0.015741	0.013305	0.76389	0.023987	1.7779	0.032663	0.95509	0.0054139	-0.61088	0.71033	0.021043	0.0079006	-0.064777	-0.74508	-0.73459	0.0093759	-0.020549	-0.016154	1.2172	-0.0062286
Amplification Peak 45 - CN values	19q13.2	chr19:38897077-39092519(probes 1569031:1569088)	chr19:38897203-39092057(probes 1569032:1569087)	chr19:38873933-39094120(probes 1569027:1569090)	0.10449	0.17185		Actual Copy Change Given	0.27931	0.068808	0.60242	-0.012851	0.018243	-0.39842	-0.1246	-0.051586	0.037217	0.0093098	0.0036076	-0.05299	0.64158	0.011958	0.34096	0.62369	-0.7324	0.0081959	-0.73565	0.020186	-0.00027724	-0.015741	0.013305	0.66249	0.73986	3.5048	0.032663	0.82099	0.0054139	-0.61088	0.71033	0.021043	0.0079006	-0.064777	-0.74508	-0.73459	0.0093759	-0.020549	-0.016154	1.172	-0.0062286
Deletion Peak 1 - CN values	1p36.32	chr1:3641699-4416323(probes 154:702)	chr1:3680480-3937581(probes 178:322)	chr1:1-26448731(probes 1:13708)	3.0299e-07	0.0077078		Actual Copy Change Given	-0.031223	-0.86176	-0.025346	0.012237	-0.75676	-0.40804	0.023145	-0.06061	0.46639	0.020203	0.0033299	-0.12356	-0.035721	0.0015641	-0.0056757	-0.06424	-0.045792	0.0048579	-0.085855	0.030029	0.0023581	0.00069327	-0.0018492	-0.025756	0.026654	0.027357	0.033508	-0.071205	0.048688	-0.6368	-0.028765	-0.66402	0.00081507	-0.0015243	-0.76141	-0.80865	-0.0010429	-0.019697	-0.0034695	-0.020824	-0.0015243
Deletion Peak 2 - CN values	1p36.23	chr1:7982677-8318933(probes 3164:3337)	chr1:8007369-8030167(probes 3172:3181)	chr1:1-26448731(probes 1:13708)	9.073e-24	3.9875e-20		Actual Copy Change Given	-1.2929	-0.86176	-0.83381	-0.5348	-0.72279	-0.40804	0.023145	-0.06061	0.46639	-0.0053992	0.0033299	-1.1424	-0.035721	0.0015641	-0.043466	-0.06424	-0.010784	0.0048579	-0.081339	0.030029	0.0023581	0.00069327	-0.0018492	-0.025756	0.026654	0.027357	0.033508	-1.0246	0.048688	-0.6368	-0.82668	-0.66402	0.00081507	-0.0015243	-0.76141	-0.77414	-0.0010429	-0.019697	-0.0034695	-0.020824	-0.0015243
Deletion Peak 3 - CN values	1p36.12	chr1:21343567-21510440(probes 10847:10936)	chr1:21433303-21487009(probes 10897:10916)	chr1:1-26448731(probes 1:13708)	7.4364e-05	0.017529		Actual Copy Change Given	0.07369	0.034536	-0.010094	-0.5348	-0.72279	-0.40804	0.023145	-0.049154	0.61952	-0.0053992	0.0033299	-0.37988	-0.035721	0.0015641	-0.051046	-0.06424	-0.010784	0.0048579	-0.081339	0.030029	0.0023581	0.00069327	-0.0018492	-0.17128	0.026654	0.022585	0.033508	-0.034223	0.048688	-0.6368	0.015447	-1.2929	0.00081507	-0.0015243	-0.76141	-0.77414	-0.0010429	-0.012989	-0.0034695	-0.020824	-0.0015243
Deletion Peak 4 - CN values	1p35.3	chr1:3780043-43162304(probes 238:23042)	chr1:27829007-28286370(probes 14218:14446)	chr1:27217033-28399443(probes 13973:14499)	0.051388	0.20219		Actual Copy Change Given	0.031577	0.034536	-0.060883	-0.48848	-0.71399	-0.40804	0.023145	-0.049154	0.61952	-0.0053992	0.0033299	-0.02603	-0.05049	0.0015641	-0.051046	-0.06424	-0.010784	0.0048579	-0.081339	0.030029	0.0023581	0.00069327	-0.0018492	-0.079742	0.026654	0.022585	0.033508	-0.16268	0.032845	-0.6368	0.0016868	0.46724	0.00081507	-0.0015243	-0.76141	-0.71364	-0.0010429	-0.012989	-0.0034695	-0.020824	-0.0015243
Deletion Peak 5 - CN values	1p32.3	chr1:50414095-51063392(probes 27112:27385)	chr1:50949445-50976325(probes 27344:27348)	chr1:50529358-51112103(probes 27167:27396)	5.8709e-12	5.8709e-12		Actual Copy Change Given	0.21192	0.0055529	-0.0016629	-0.9213	-0.72225	-0.40804	0.023145	-0.011749	0.61952	-0.0053992	0.0033299	0.0075	0.015308	0.0015641	-0.0070576	-0.06424	0.012795	0.0048579	-0.081339	-1.1346	0.0023581	0.00069327	-0.0018492	0.0282	0.0012481	0.01447	0.0013029	-0.075478	0.024377	-0.6368	0.043015	0.46724	0.00081507	-0.0015243	-0.76141	-0.76149	-0.0010429	-0.012989	0.0063871	-0.020824	-0.0015243
Deletion Peak 6 - CN values	1q41	chr1:211674694-226871795(probes 114148:124406)	chr1:219910818-222597360(probes 119986:121793)	chr1:212124709-226095464(probes 114373:123940)	0.0044595	0.0044966		Actual Copy Change Given	0.15517	0.0041632	0.00458	0.00046683	0.0044411	0.0051359	-0.020961	0.21253	0.6328	0.024689	0.0033299	0.016705	-0.0059522	-0.0011087	-0.0015243	-0.077078	-0.0059522	0.0048579	-0.2201	0.004719	-0.079476	-0.0063668	-0.0018492	-0.0026322	0.0012481	0.54101	0.0013029	-0.94569	0.0044411	0.0053806	0.034536	0.45394	-0.00025216	0.47118	0.011261	0.010424	-0.0031831	0.015866	0.00458	-0.0049844	-0.00067843
Deletion Peak 7 - CN values	1q44	chr1:245701488-247036917(probes 137819:138177)	chr1:245748566-246884306(probes 137850:138102)	chr1:245592870-245973463(probes 137736:138065)	0.034373	0.033154		Actual Copy Change Given	0.15517	0.0041632	0.00458	0.0058309	0.041462	0.0051359	0.016985	0.21253	0.6328	-0.80617	0.0037465	0.019643	-0.0059522	-0.0011087	-0.0015243	-0.077078	-0.0059522	0.0048579	-0.2201	0.004719	-0.079476	-0.0063668	-0.0018492	0.4402	0.0012481	0.0018439	0.002179	-0.0044312	0.0044411	-0.0057743	0.045849	0.45394	-0.00025216	-0.52348	0.053379	0.010424	-0.00062062	-0.011887	0.00458	-0.0049844	-0.00067843
Deletion Peak 8 - CN values	2p14	chr2:1-242193529(probes 138547:286658)	chr2:65306057-65440137(probes 183340:183428)	chr2:65374976-65375391(probes 183385:183386)	0.23415	0.23624		Actual Copy Change Given	0	0	0	-0.0036011	0.01433	0	-0.014366	-0.020549	0.19756	0.0065262	-0.0078863	-0.017254	0.020396	0.00013863	-0.92115	0.008892	0.020763	0.0070826	-0.0016629	0	-0.0099565	0.0044411	-0.0014337	0.0048579	-0.0019399	-0.018628	-0.0037796	-0.0051227	-0.011611	-0.0079778	-0.017087	-0.0047079	0.00058825	0.00013863	0.0022193	0.0086135	0.0004818	-0.027671	0	0	0
Deletion Peak 9 - CN values	2q22.1	chr2:138898047-142880269(probes 222923:225565)	chr2:140223496-142136706(probes 223785:225119)	chr2:141278551-141282710(probes 224453:224454)	0.0076701	0.0077078		Actual Copy Change Given	0.28248	0	0	-0.0036011	-0.0036011	0	-0.0012473	0.0060774	0.19756	0.0065262	-0.010232	0.00083195	0.020396	0.00013863	-0.0055375	-0.01849	-0.20473	-0.013047	0.004719	-0.0066432	-0.0099565	0.0044411	-0.0014337	0.0048579	-0.0019399	-0.036401	-0.0037796	-0.010094	-0.011611	-0.0079778	-0.83268	-0.0047079	0.00058825	0.00013863	-0.017941	-0.010794	0.0004818	-0.0016629	-0.21886	0.021323	0
Deletion Peak 10 - CN values	2q37.3	chr2:232328859-242193529(probes 280651:286658)	chr2:236320176-236512466(probes 283347:283429)	chr2:236247032-236847306(probes 283305:283660)	0.058539	0.057211		Actual Copy Change Given	0.35376	0	0	-0.0036011	0.039761	-0.0046773	-0.094592	-0.021902	0.20152	-0.041702	-0.010232	0.00083195	-0.0070586	0.00013863	-0.0055375	-0.92369	-0.27188	-0.013047	0.004719	-0.0066432	0.0023581	0.0048253	-0.0014337	0.010703	0.020763	-0.0026322	-0.0037796	-0.010094	-0.011611	-0.0051227	-0.016567	0.0013056	-0.0058308	-0.032178	0.014609	0.016705	0.0004818	-0.020961	-0.29213	-0.0093914	0
Deletion Peak 11 - CN values	3q29	chr3:188946133-196049718(probes 400701:405141)	chr3:194576042-194595303(probes 404599:404604)	chr3:187728261-196551494(probes 399768:405382)	0.0010516	0.0010516		Actual Copy Change Given	0.3669	-0.00027724	0.00458	-0.0011087	0.079665	-0.0018481	-0.00097017	0.00097064	0.15188	0.010564	0	0.023566	-0.0073339	0.00069327	0.0049969	0.0036076	-0.13264	0.0011093	0.013353	-0.0026322	-0.0066432	0.0040243	-0.0018492	0.0049969	0.00055459	-0.97317	-0.0062687	0.039054	0.011121	-0.10211	0.042166	0.0011093	-0.0038571	-0.011959	0.0082864	0.0051359	0.01158	-0.089037	0.04259	0.013911	0.0035144
Deletion Peak 12 - CN values	4q31.3	chr4:145677351-181161702(probes 492784:514309)	chr4:150572270-150588686(probes 495654:495655)	chr4:150541471-150746993(probes 495633:495721)	0.030956	0.10322		Actual Copy Change Given	0.0029133	-0.011973	0.0040243	-0.006505	0.017404	-0.0042929	-0.014811	0.0048579	-0.1935	-0.057654	-0.034222	0.0282	-0.0008316	-0.082269	-0.002955	0.017117	-0.020138	-0.0018014	-0.78774	-0.0060904	-0.010922	-0.0051125	0.0057829	-0.010094	-0.016567	-0.024251	-0.0082025	-0.0031698	-0.21528	-0.038559	0.013983	-0.028551	-0.0020952	-0.0060335	-0.020138	-0.33776	0.0033076	0.0023581	-0.13103	0.021043	0.0020992
Deletion Peak 13 - CN values	4q34.3	chr4:177990720-182139540(probes 512793:515130)	chr4:180603979-181161702(probes 514305:514309)	chr4:178358908-182428276(probes 513015:515377)	2.5881e-05	5.5051e-05		Actual Copy Change Given	0.0029133	-0.011973	0.0024969	-0.006505	-0.21317	-0.0042929	-0.014811	0.0048579	-0.1968	-0.057654	-0.034222	-1.2929	-0.0008316	-0.082269	-0.002955	-0.0063246	-0.020138	-0.0053139	-0.78774	-0.0008316	-0.010922	-0.0051125	0.0057829	0.0048579	-0.016567	-0.024251	-0.0082025	-0.0031698	-0.022332	-0.038559	0.01185	-0.010232	-0.0020952	-0.0095506	-0.020138	-0.61825	0.0033076	0.0023581	-0.13103	0.021043	0.0020992
Deletion Peak 14 - CN values	5q35.3	chr5:179669480-179704141(probes 628485:628505)	chr5:179678267-179681246(probes 628498:628499)	chr5:179676726-179681392(probes 628488:628501)	0.0095226	0.0097744		Actual Copy Change Given	0.0030522	-0.0041546	-0.00041585	0.00083195	0.026373	-0.0031859	-0.09261	0.029184	-0.16523	0.011818	-0.0031875	0.003191	0	-0.0011087	-0.068797	0.0079175	-0.029857	-0.15694	-0.00041585	-0.0013858	-0.00055444	-0.00097017	0.0017692	-0.059807	-0.0023553	0.010006	-0.0061305	-0.078943	0.015028	0.0063871	0.018103	-0.00097017	0.0053969	-0.020824	0.0063871	0.039054	0.0099331	-0.014366	0.0029133	-0.017254	-0.0037395
Deletion Peak 15 - CN values	6p12.3	chr6:1-112072189(probes 629220:697371)	chr6:7979912-96840560(probes 635052:688089)	chr6:7897168-8058405(probes 634993:635110)	0.20724	0.20619		Actual Copy Change Given	-0.021647	-0.0035319	-0.0020784	-0.018353	-0.048072	0.0043418	0.0052749	-0.018216	0	-0.00069303	-0.0060894	-0.013953	0.0051359	0	0.0013868	0.018803	0.010564	0	0.0011093	-0.00069303	0.0012481	-0.00055444	0.0047671	-0.0055375	-0.011335	-0.021336	-0.0046097	-0.00072659	-0.029038	0.0015255	0	0	0.0002604	0.037217	0	-0.0066519	-0.00035	0.0072217	0.0012481	0.0086135	0.0012481
Deletion Peak 16 - CN values	6q24.1	chr6:113933430-147577196(probes 698662:719518)	chr6:140678770-140687161(probes 715229:715230)	chr6:124780839-145604458(probes 704807:718323)	0.0056191	0.021052		Actual Copy Change Given	-0.046177	-0.0035319	-0.61146	0.0033717	-0.041838	-0.0051806	-0.082402	-0.0044312	0	-0.027398	-0.010676	-0.76124	0.0046204	0	0.0013868	-0.89181	0.010564	0	-0.78824	-0.00069303	0.0012481	-0.00055444	0.0047671	-0.0055375	-0.031905	-0.014366	-0.0046097	0.010982	-0.029038	-0.0020784	0	0	0.0002604	-0.026988	0	0.0029133	-0.00035	-0.076012	-0.0021669	-0.69094	0.0012481
Deletion Peak 17 - CN values	6q26	chr6:163346930-163666898(probes 730485:730692)	chr6:163412504-163580459(probes 730536:730621)	chr6:161569485-170805979(probes 729386:734693)	3.6804e-07	9.3214e-07		Actual Copy Change Given	0.0052749	0.00055459	0.017404	0.017963	0.058367	-0.0051806	-0.082402	-0.0044312	0.04741	-0.0008316	0.0056919	-0.76124	0.0046204	-0.0069111	0.0013868	-0.89181	0.010564	0	-0.80782	-0.00069303	0.0012481	-0.00055444	0.0055049	-0.0055375	-0.031905	0.013632	-0.0046097	0.010982	0.014051	-0.0020784	-0.82171	0.042166	0.0002604	-0.028217	0.018663	0.0029133	-0.00035	-0.076012	-0.0039761	-0.69094	0.0012481
Deletion Peak 18 - CN values	8p23.2	chr8:2166023-6404670(probes 828220:832587)	chr8:2926897-4996752(probes 828315:830682)	chr8:4042755-4046725(probes 829499:829500)	0.048252	0.048252		Actual Copy Change Given	-0.43051	-0.0037395	-0.017529	-0.0071958	-0.012162	-0.0026322	0.008892	-0.0058306	-0.12056	0.024268	0.014749	0.016006	-0.0020784	0.032281	-0.93681	-0.90904	-0.19612	0.0058309	0.071822	0.016146	0.00069327	0.0013868	0	0.0013545	0.056085	0	0.0018692	0	0.010424	-0.011335	-0.0079523	-0.012989	-2.6292e-05	0.18313	0.0068616	-0.0036011	0.0078444	0.023005	-0.0026322	-0.0030475	0.00041593
Deletion Peak 19 - CN values	9p24.3	chr9:1-12693402(probes 920161:928212)	chr9:840502-1540025(probes 920216:920355)	chr9:1-2024723(probes 920161:920876)	0.051823	0.15904		Actual Copy Change Given	0.10731	0.0066653	-0.79536	-0.51609	-0.041567	0.0084743	0	0.3348	0.37545	-0.10998	-0.00027724	0.021043	0.025531	-0.0019545	-0.9289	-0.87432	0	-0.0037395	-0.035857	0.0095883	0.0019418	-0.77745	-0.0042906	0.022585	-0.036606	0.015447	0.0055125	-0.90799	-0.76561	-0.0037395	-0.80704	0.010842	0.00022246	-0.44631	0.017684	-0.0971	-0.006992	0.0069659	-0.085324	-0.04428	0.014884
Deletion Peak 20 - CN values	9p23	chr9:7799607-10617849(probes 925496:927620)	chr9:9769286-9823723(probes 927052:927053)	chr9:8716798-10063344(probes 926247:927173)	0.0042673	0.051602		Actual Copy Change Given	0.056798	0.0066653	-0.79536	-0.51609	-0.041567	0.0084743	0	0.3348	0.37545	-0.10998	-0.00027724	-0.75297	-0.85607	-0.0019545	-0.91281	-0.87432	0	-0.0037395	-0.035857	0.0095883	0.0019418	-0.77745	-0.0042906	-0.84611	-0.036606	0.015447	0.0055125	-0.90799	-0.76561	-0.00041585	-0.79755	0.010842	0.013057	-0.45392	0.017684	-0.0971	-0.006992	0.0069659	-0.085324	-0.0016629	0.014884
Deletion Peak 21 - CN values	9p21.3	chr9:19449173-21310588(probes 933830:935305)	chr9:20407937-20416453(probes 934614:934615)	chr9:16564566-33065151(probes 931432:942555)	2.4424e-30	0.10322		Actual Copy Change Given	-0.78656	0.0066653	-0.79536	-1.0648	-0.072541	0.0084743	0	-1.0086	0.37844	-0.10998	-0.00027724	-0.75297	-0.81236	-0.0019545	-0.91281	-0.87432	0	-0.0037395	-0.035857	-0.6027	-0.061555	-0.77745	-0.00026119	-0.83535	-0.016017	-0.01849	0.0055125	-0.90223	-0.76561	-0.00041585	-0.79755	-0.012851	-0.0029424	-0.31809	0.017684	-0.0971	-0.006992	0.0069659	-0.085324	-0.0016629	0.022164
Deletion Peak 22 - CN values	9p21.3	chr9:21865499-21997723(probes 935642:935706)	chr9:21959053-21997723(probes 935693:935706)	chr9:16564566-33065151(probes 931432:942555)	2.4878e-223	7.471e-188		Actual Copy Change Given	-1.2929	0.0066653	-0.79536	-1.0648	-1.2929	0.0084743	0	-1.0086	0.37844	-0.10998	-0.00027724	-1.2929	-0.82578	-0.0019545	-1.2929	-1.2929	0	-0.0037395	-0.035857	-1.2118	-0.061555	-0.77745	-0.00026119	-1.2929	-0.016017	-0.01849	0.0055125	-1.2929	-1.2929	-0.00041585	-1.2929	0.0066653	0.0031741	-0.31809	0.017684	-0.0971	-0.006992	0.0069659	-0.085324	-0.0016629	0.022164
Deletion Peak 23 - CN values	9p21.3	chr9:22119130-23507724(probes 935814:936678)	chr9:22646075-22829484(probes 936119:936245)	chr9:16564566-33065151(probes 931432:942555)	2.8753e-94	0.0014438		Actual Copy Change Given	-0.81933	0.0066653	-0.79536	-0.51938	-0.095384	0.0084743	0	-1.0086	0.37844	-0.10998	-0.00027724	-0.75409	-0.82578	-0.0019545	-1.2929	-1.2929	0	-0.0037395	-0.035857	-0.59857	-0.061555	-0.7502	-0.00026119	-0.86562	-0.016017	-0.01849	0.0055125	-0.90343	-0.78235	-0.00041585	-1.2929	0.0066653	0.0031741	-0.26384	0.017684	-0.0971	-0.006992	0.0069659	-0.085324	-0.0016629	0.022164
Deletion Peak 24 - CN values	9p21.3	chr9:22822675-25677216(probes 936245:938112)	chr9:23495186-23672515(probes 936678:936828)	chr9:16564566-33065151(probes 931432:942555)	6.0627e-72	0.0004512		Actual Copy Change Given	0.046275	0.0066653	-0.79536	-0.51938	-0.095384	0.0084743	0	-1.0086	0.37844	-0.10998	-0.00027724	-0.75409	-0.83839	-0.0019545	-1.2929	-0.88496	0	-0.0037395	-0.035857	-0.59857	-0.061555	-0.7502	-0.00026119	-0.86562	-0.016017	-0.01849	0.0055125	-0.90343	-0.78235	-0.00041585	-1.2929	0.0066653	0.0031741	-0.26384	0.017684	-0.0971	-0.006992	0.0069659	-0.085324	-0.0016629	0.022164
Deletion Peak 25 - CN values	9p21.2	chr9:24545214-26841185(probes 937388:938775)	chr9:26030589-26118859(probes 938352:938388)	chr9:16564566-33065151(probes 931432:942555)	7.5287e-50	4.0018e-05		Actual Copy Change Given	0.046275	0.0066653	-0.79536	-0.5352	-0.095384	0.0084743	0	-1.0086	0.37844	-0.10998	-0.00027724	0.0026357	-0.83575	-0.0019545	-0.90031	-0.88496	0	-0.0037395	-0.035857	-0.0029091	-0.061555	-0.7502	-0.00026119	0.0063871	-0.016017	-0.01849	0.0055125	-0.90343	-0.78235	-0.00041585	-0.80152	0.0066653	0.0031741	-0.26384	0.017684	-0.0971	-0.006992	0.0069659	-0.085324	-0.0016629	0.022164
Deletion Peak 26 - CN values	9p21.2	chr9:27296708-27546829(probes 939103:939318)	chr9:27315626-27537801(probes 939119:939309)	chr9:16564566-33065151(probes 931432:942555)	4.3115e-27	0.054443		Actual Copy Change Given	0.046275	0.0066653	-0.79536	-0.5352	-0.095384	0.0084743	0	-1.0086	0.37844	0	-0.00027724	0.0026357	-0.83575	-0.0019545	-0.93216	-0.88496	0	-0.0037395	-0.035857	-0.0029091	-0.061555	-0.7502	-0.00026119	0.0063871	-0.016017	-0.01849	0.0055125	-0.90343	-0.78235	-0.00041585	-0.80152	0.0066653	0.0031741	-0.26384	0.017684	-0.0971	-0.006992	0.0069659	-0.085324	-0.0016629	0.022164
Deletion Peak 27 - CN values	9p21.1	chr9:27572514-30389494(probes 939334:940736)	chr9:27944442-28981527(probes 939663:939979)	chr9:16564566-33065151(probes 931432:942555)	1.9784e-23	0.00010543		Actual Copy Change Given	0.046275	0.0066653	-0.79536	-0.50753	-0.095384	0.0084743	0	0.3382	0.37844	0	-0.00027724	0.0026357	-0.83575	-0.0019545	-0.93216	-0.88496	0	-0.0037395	-0.035857	-0.61997	-0.061555	-0.7502	-0.00026119	0.0063871	-0.016017	-0.01849	0.0055125	-0.90343	-0.78235	-0.00041585	-0.80152	0.0066653	0.0031741	-0.26384	0.017684	-0.0971	-0.006992	0.0069659	-0.085324	-0.0016629	0.022164
Deletion Peak 28 - CN values	9p13.2	chr9:37033163-38394166(probes 944890:945733)	chr9:37584691-37905744(probes 945174:945371)	chr9:36448074-38608387(probes 944429:945901)	0.0052979	0.015278		Actual Copy Change Given	0.074552	0.0066653	-0.81745	-0.53754	-0.0080244	0.0084743	0	0.28725	0.37844	0	-0.00027724	0.0026357	0.00013863	-0.0019545	0.0079175	0.016146	0	-0.0037395	0.024969	0.011679	-0.017391	-0.0015243	-0.00026119	0.0063871	-0.016017	0.0114	0.0055125	-0.67894	-0.72958	-0.00041585	-0.023429	0.0066653	0.0031741	-0.26384	0.017684	-0.054016	-0.006992	0.0069659	-0.010211	-0.0016629	0.022164
Deletion Peak 29 - CN values	10p15.2	chr10:1162887-4209266(probes 994651:997548)	chr10:3311103-3754376(probes 996766:997105)	chr10:3551322-3551994(probes 996936:996937)	0.10916	0.10739		Actual Copy Change Given	-0.97288	0.0023581	-0.83305	-0.53042	-0.84307	0.0033469	-0.03395	-0.2881	-0.76021	0.01433	0.0051359	-0.78083	-0.86584	-0.0044312	-0.94382	0.013911	0.0043249	-0.011887	0.73587	-0.60109	-0.031359	0.0029133	-0.0022647	-0.86939	0	-0.98899	0.00065304	-0.9666	-0.77309	0.0091705	-0.82296	-0.6652	0.0015086	-0.031086	0.015587	-0.011749	-0.010926	0.015866	0.71999	0.00027728	-0.0029091
Deletion Peak 30 - CN values	10q23.31	chr10:87857401-88274281(probes 1052993:1053424)	chr10:87857645-87976150(probes 1052994:1053181)	chr10:87658974-88675736(probes 1052846:1053630)	8.0992e-21	3.1813e-17		Actual Copy Change Given	-0.97288	0.0023581	-0.80728	-0.53042	-0.61027	0.0041632	-0.07921	0.0097276	-0.76021	0.01433	0.0051359	-0.58353	-0.83462	-0.0044312	-0.93356	0.011121	-0.0098185	0.0012481	0.0044411	-0.41509	0	-0.023018	-0.0022647	-0.60051	0	-0.78201	0.00065304	-0.94598	-0.75252	0.0091705	-1.1937	-0.65975	-0.0018959	-0.034223	0.015587	-0.011749	-0.0098909	-0.050776	0.014051	0.00027728	-0.0029091
Deletion Peak 31 - CN values	10q23.31	chr10:87970891-88590152(probes 1053181:1053579)	chr10:88281559-88590152(probes 1053433:1053579)	chr10:87658974-88675736(probes 1052846:1053630)	1.597e-11	6.5092e-05		Actual Copy Change Given	-0.97288	0.0023581	-0.80728	-0.53042	-0.80749	0.0041632	-0.07921	0.0097276	-0.76021	0.01433	0.0051359	-0.75668	-0.83462	-0.0044312	-0.93356	0.011121	-0.0098185	0.0012481	0.0044411	-0.60322	0	-0.023018	-0.0022647	-0.88065	0	-0.96523	0.00065304	-0.94598	-0.75252	0.0091705	-0.80343	-0.65975	-0.0018959	-0.034223	0.015587	-0.011749	-0.0098909	-0.050776	0.014051	0.00027728	-0.0029091
Deletion Peak 32 - CN values	10q26.3	chr10:133376759-133797422(probes 1084115:1084131)	chr10:133376926-133797422(probes 1084117:1084131)	chr10:133182210-133797422(probes 1084071:1084131)	3.2777e-05	3.2777e-05		Actual Copy Change Given	-0.98847	0.0023581	-0.80728	-0.53042	-0.83704	0.0041632	-0.07921	-0.0020784	-0.76021	-0.75963	0.0051359	-0.77617	-0.83462	-0.070169	-0.93356	-0.9721	-0.043602	0.0012481	0.0033299	-0.60322	-0.033405	-0.023018	-0.0022647	-0.86931	0	-1.062	0.00065304	-1.2929	-0.73424	0.0091705	-0.80343	-0.65975	-0.00057131	-0.61104	0.015587	-0.011749	-0.0098909	-0.050776	-0.034359	-0.024798	-0.0029091
Deletion Peak 33 - CN values	11p15.5	chr11:1-13280373(probes 1084132:1092999)	chr11:1660063-1883626(probes 1084559:1084628)	chr11:1-3726981(probes 1084132:1085421)	0.043345	0.04489		Actual Copy Change Given	-0.62484	0.010842	-0.020138	0	0.024268	0.0037465	-0.36056	-0.0027707	-0.43843	-0.22834	-0.0035301	-0.059807	0.00055459	-0.028491	0.011539	-0.88588	-0.7353	0.006109	0.010146	0.0029133	-0.57621	0.73739	-0.0018492	0.012795	0.0057162	0.0024969	0.0027342	-0.098418	0.011261	0.018663	-0.082934	0.012376	0.011244	-0.20411	0.040892	0.21238	-0.0017356	-0.62608	-0.7449	-0.0022168	0.0010704
Deletion Peak 34 - CN values	11q14.1	chr11:79436997-82734567(probes 1129601:1132105)	chr11:80748770-80765370(probes 1130625:1130629)	chr11:80538690-80822391(probes 1130484:1130654)	0.15991	0.15904		Actual Copy Change Given	-0.62484	0.0049969	0.011962	-0.0087146	0.027216	0.0037465	0.0033299	0.011539	-0.43843	-0.0013701	0.09072	0.00597	0.011818	0.0068136	0.012934	0.017544	0.04954	0.006109	0.016286	0.0029133	-0.049559	0.024548	-0.0018492	0.011818	0.0057162	-0.027398	-0.0010104	0.010703	0.0087528	-0.68997	-0.014346	0.012376	0.0046815	0.0077783	-0.017529	0.20396	-0.0017356	0.028763	0.0077783	0.019083	0.0010704
Deletion Peak 35 - CN values	12q14.3	chr12:57779147-68675997(probes 1201222:1208294)	chr12:66339840-66683750(probes 1206503:1206750)	chr12:66369771-66895090(probes 1206517:1206930)	0.19686	0.20219		Actual Copy Change Given	-0.14335	0.0037465	-0.0011087	-0.0012473	-0.0016629	0.0029133	-0.2554	0.46656	0.161	-0.027945	-0.00041585	0.0010893	-0.0076101	-0.11809	0.0041632	-0.87385	-0.13083	-0.043873	0.0044411	-0.0056757	-0.57887	-0.005261	-0.0030187	-0.0095426	-0.00027724	-0.01918	0.0017994	-0.0019399	-0.005261	-0.0013858	0.0023664	0.0043526	-0.0019567	-0.0012473	-0.0085766	-0.037626	0	-0.51743	-0.086651	0.012795	-0.0001033
Deletion Peak 36 - CN values	12q24.33	chr12:128243237-130792485(probes 1247357:1248535)	chr12:129312095-130592327(probes 1248359:1248360)	chr12:129312265-130593879(probes 1248360:1248361)	0.20619	0.20619		Actual Copy Change Given	-0.07401	0.0037465	-0.00013862	-0.0012473	-0.040209	0.0029133	-0.24521	0.74537	0.16565	0.0066653	0.13643	-0.026851	-0.029721	-0.014228	-0.9638	0.017264	-0.14361	-0.0088526	0.0044411	0.013492	-0.57991	-0.005261	-0.0030187	0.0016642	-0.00027724	0.012237	0.0017994	0.0026357	0.0098669	0.025812	0.015168	0.0043526	-0.0019567	-0.018353	-0.0049844	0.0022193	0.00075915	-0.51743	-0.058058	-0.024114	0.00027728
Deletion Peak 37 - CN values	13q12.12	chr13:1-98453637(probes 1249523:1300130)	chr13:23468931-24003892(probes 1252165:1252221)	chr13:1-28153995(probes 1249523:1255387)	0.010136	0.14431		Actual Copy Change Given	0.060079	-0.020549	-0.23728	-0.51527	-0.0019399	-0.0031859	-0.028901	-0.021235	-0.39361	0.0066653	-0.0050344	-0.045635	-0.0011087	-0.1508	0.0058309	-0.89939	-0.73134	0.0094491	-0.28096	-0.0045695	-0.013677	0	-0.0007409	0	-0.0073339	0.0084743	-0.0028712	-0.022838	-0.0041546	0	-0.065045	-0.66615	-0.0041714	-0.013677	0.0051359	0.086377	-0.0074064	-0.026239	-0.0085766	0.0073609	0.00083195
Deletion Peak 38 - CN values	13q14.2	chr13:48301193-48490671(probes 1269651:1269880)	chr13:48301617-48486701(probes 1269652:1269878)	chr13:31317025-64373620(probes 1257730:1277954)	3.3773e-08	1.6748e-07		Actual Copy Change Given	0.025126	-0.020549	-0.23728	-0.51527	-0.0020784	-0.0031859	-0.079609	-0.49172	-0.38362	-0.0076724	-0.0050344	-0.059673	-0.0011087	-0.1508	-0.0055378	-0.86232	-0.73134	-0.034086	-0.31307	-0.0045695	-0.013677	0	-0.0007409	0	-0.0073339	-0.030131	-0.0028712	-0.12317	-0.0041546	0	-0.065045	-0.66615	-0.0041714	-0.013677	0.0051359	0.086377	-0.0074064	-0.026239	-0.032587	0.0073609	0.00083195
Deletion Peak 39 - CN values	14q11.2	chr14:1-30561663(probes 1311329:1318070)	chr14:23955850-24054062(probes 1314016:1314039)	chr14:1-30341821(probes 1311329:1317955)	0.0006026	0.014932		Actual Copy Change Given	-0.60216	0.006109	0.0087528	0.00027728	-0.4805	0.0044832	0.0020805	-0.024661	-0.73143	0.0070826	-0.0012473	-0.0067813	-0.015329	0.0029133	-0.063241	0	-0.30839	-0.04211	-0.20087	-0.59818	-0.0022168	0.0012481	0.00022939	-0.020138	0.025812	-0.015303	0.0048176	-0.96136	0.02539	0.012376	0.011818	-0.087049	-0.0079152	0.0011093	0.012516	-0.015329	-0.056378	0.012934	0.0041632	0.0030522	-0.00041585
Deletion Peak 40 - CN values	14q13.1	chr14:32832643-33924794(probes 1319435:1320444)	chr14:32924537-33804537(probes 1319506:1320378)	chr14:30776766-34576752(probes 1318185:1320899)	1.7897e-05	0.00015504		Actual Copy Change Given	-0.60216	0.006109	0.0087528	0.00027728	-0.83114	0.0044832	0.0020805	0.030553	-0.73143	0.0070826	-0.0012473	0.047694	0.057653	0.0029133	0.046275	0	-0.26564	-0.04211	-0.20087	-0.59818	-0.0022168	0.0012481	0.00022939	0.043299	0.025812	-0.015303	0.0048176	0.069812	0.02539	0.012376	0.011818	-0.65929	-0.0079152	0.0011093	0.012516	-0.065045	-0.056378	0.012934	0.0041632	0.0030522	-0.00041585
Deletion Peak 41 - CN values	14q21.2	chr14:35273858-59606763(probes 1321177:1336383)	chr14:44891999-44920462(probes 1326815:1326825)	chr14:44350433-45000394(probes 1326501:1326861)	0.036325	0.17065		Actual Copy Change Given	-0.60216	0.006109	0.0087528	0.00027728	-0.87891	0.0044832	-0.076812	-0.0095426	-0.73143	0.0070826	0.0023581	-0.0012917	-0.0047079	0.0029133	-0.010094	0	-0.26564	-0.04211	-0.20087	-0.59818	-0.0092742	0.0012481	0.00022939	-0.012851	0.025812	-0.015303	0.0048176	-0.028765	-0.045499	0.012376	0.011818	-0.65929	-0.0001555	0.0011093	-0.77082	-0.065045	-0.056378	0.012934	0.0041632	0.0030522	-0.00041585
Deletion Peak 42 - CN values	14q24.2	chr14:62133966-99517086(probes 1337870:1363121)	chr14:73229250-73278678(probes 1345032:1345068)	chr14:72477045-74726574(probes 1344533:1345857)	0.027483	0.064455		Actual Copy Change Given	-0.60361	0.006109	0.0087528	0.00027728	-0.81606	0.0044832	0.015168	-0.0095426	-0.73143	0.0070826	0.0023581	-0.0012917	-0.0047079	0.0029133	-0.0073327	-0.88596	-0.32344	-0.29272	-0.20087	-0.59818	-0.0092742	0.0012481	0.00022939	-0.0098185	-0.72181	0.004719	0.0048176	0.0012481	0.71961	0.012376	-0.0013858	-0.66344	-0.0029412	0.0011093	-0.77082	-0.032723	-0.054221	0.012934	0.0041632	-0.66901	-0.00041585
Deletion Peak 43 - CN values	14q32.2	chr14:68974290-107043718(probes 1342184:1365958)	chr14:99681208-99732598(probes 1363227:1363252)	chr14:99691455-99856088(probes 1363233:1363335)	0.092547	0.20619		Actual Copy Change Given	-0.60618	0.006109	-0.01037	0.00027728	-0.8548	0.0044832	0.015168	-0.016704	-0.73143	0.0070826	-0.0063608	-0.016704	-0.068127	0.0029133	-0.0073327	-0.90054	-0.32344	-0.0073339	-0.20087	0.026092	-0.011749	0.0012481	0.00022939	-0.0098185	-0.72181	0.004719	0.0048176	0.0012481	0.0034687	0.012376	-0.0013858	-0.65836	0.0010925	-0.051721	-0.77082	-0.047124	-0.061027	0.012934	0.0041632	-0.0020784	-0.00041585
Deletion Peak 44 - CN values	15q15.1	chr15:36885487-43519644(probes 1373476:1377485)	chr15:41919071-41930956(probes 1376662:1376668)	chr15:28315871-59510556(probes 1369425:1387689)	4.3454e-06	0.025821		Actual Copy Change Given	-0.099736	0.010982	-0.81129	0.012934	0.062794	0.013772	-0.11404	0.069956	0.094782	0.0084743	0.0051359	-0.0060904	-0.00069303	-0.0037549	0.0058309	-0.88333	-0.26252	-0.0076101	-0.0083005	0.018663	0.00041593	0.014888	0.0013389	-0.039122	0.0083351	0.0052749	0.0074596	-0.070402	0.028763	0.013353	-0.01849	0.02806	0.00099912	0.0033299	0.032704	-0.31867	-0.0011815	-0.023155	-0.057924	-0.011887	-0.00057254
Deletion Peak 45 - CN values	15q21.1	chr15:1-101991189(probes 1365959:1415656)	chr15:45508838-45616172(probes 1378362:1378392)	chr15:28315871-59510556(probes 1369425:1387689)	2.4472e-05	0.23624		Actual Copy Change Given	-0.099736	0.010982	-0.79736	0.012934	0.0049969	0.013772	-0.11404	0.069956	0.094782	0.0084743	0.0051359	-0.0060904	-0.00069303	-0.0037549	0.0058309	-0.88333	-0.26252	-0.0076101	-0.0083005	0.018663	0.00041593	0.014888	0.0013389	-0.039122	0.0083351	0.0052749	0.0074596	-0.070402	0.028763	0.013353	-0.01849	0.02806	0.00099912	0.0033299	0.032704	-0.35977	-0.0011815	-0.023155	-0.057924	-0.011887	-0.00057254
Deletion Peak 46 - CN values	15q21.1	chr15:1-101991189(probes 1365959:1415656)	chr15:45584310-45616172(probes 1378387:1378392)	chr15:28315871-59510556(probes 1369425:1387689)	2.2252e-05	0.25867		Actual Copy Change Given	-0.099736	0.010982	-0.79736	0.012934	0.0049969	0.013772	-0.11404	0.069956	0.094782	0.0084743	0.0051359	-0.0060904	-0.00069303	-0.0037549	0.0058309	-0.88333	-0.26252	-0.0076101	-0.0083005	0.018663	0.00041593	0.014888	0.0013389	-0.039122	0.0083351	0.0052749	0.0074596	-0.070402	0.028763	0.013353	-0.01849	0.02806	0.00099912	0.0033299	0.032704	-0.35977	-0.0011815	-0.023155	-0.057924	-0.011887	-0.00057254
Deletion Peak 47 - CN values	16p12.1	chr16:20352071-27207535(probes 1427357:1431158)	chr16:25689626-26138624(probes 1429868:1430273)	chr16:25914416-25918282(probes 1430071:1430072)	0.11859	0.11688		Actual Copy Change Given	-0.065045	0.011958	0.011539	0.00069327	0.0051359	0.019643	0.0011093	-0.027398	-0.16675	0.016286	-0.0024938	-0.04048	-0.0095426	-0.005261	-0.0076101	-0.032723	-0.021235	0.0056919	-0.027261	0.024829	0.0095883	-0.007155	0.0048099	-0.019452	0.018396	0.022304	0.0094086	0.0024969	0.038065	0.035806	-0.0070576	0.023784	0.0016474	0.0024969	0.037641	0.043157	-0.0044796	-0.25878	0.019223	-0.013815	-0.00041585
Deletion Peak 48 - CN values	17q11.2	chr17:30999718-31395600(probes 1476070:1476233)	chr17:31092688-31381425(probes 1476110:1476229)	chr17:31181983-31332182(probes 1476146:1476207)	0.033003	0.031021		Actual Copy Change Given	-0.12108	0.026092	-0.020824	-0.21763	0.047268	0.026795	-0.015329	0.1252	-0.21515	0.0034687	0.0076392	-0.027535	-0.026441	0.010982	-0.038578	-0.005814	-0.0053992	0.0068044	0.010982	0.023005	0.016006	-0.0042929	0.00078404	-0.037218	0.015308	0.018803	0.023666	-0.08094	-0.0094046	0.020763	-0.049965	-0.022955	-0.0034796	0.002077	0.06308	0.060477	-0.0025665	-0.00055444	-0.010232	-0.016704	-0.0056757
Deletion Peak 49 - CN values	19q13.41	chr19:45392431-57121765(probes 1572012:1577519)	chr19:51684550-51754419(probes 1575021:1575065)	chr19:43989485-58617616(probes 1571215:1578282)	2.8771e-05	2.7652e-05		Actual Copy Change Given	0.27931	-0.81767	0.64506	-0.012438	0.018243	-0.39842	-0.1246	-0.051586	0.037217	0.0093098	0.0036076	-0.05299	0.64158	0.011958	0.34096	-0.91073	-0.75089	0.0081959	-0.74572	0.020186	-0.00027724	-0.015741	0.013305	0.66249	-0.73143	-0.961	0.032663	0.79743	0.0054139	-0.61088	0.71033	0.021043	0.0079006	-0.10513	-0.74508	-0.73459	0.0093759	-0.020549	-0.016154	-0.67177	-0.0062286
Deletion Peak 50 - CN values	22q13.31	chr22:43995492-50818468(probes 1656865:1660840)	chr22:46004082-46091647(probes 1658369:1658406)	chr22:42013492-50818468(probes 1655575:1660840)	0.0001538	0.00015504		Actual Copy Change Given	0.12564	0.031999	-0.0073339	0.015447	0.064511	0.032281	-0.014778	-0.28739	-0.51979	0.021744	0.0073609	-0.027398	-0.03885	-0.10118	-0.020687	-0.012576	-0.04726	0.0043021	-0.24861	-0.58009	-0.0094275	-0.0076279	0.0050879	-0.0091286	0.029184	-0.98162	-0.86494	-0.031768	0.039619	0.038065	-0.83696	-0.65323	-0.0019567	0.0016642	0.078294	-0.0020784	-0.0025665	-0.60516	-0.0011087	-0.027398	-0.013127
cytoband	7p11.2	7p11.2	12q14.1	1q32.1	4q12	12q15	12p13.32	3q26.33	12q14.1	12q15	12q14.1	12q14.2	7q21.2	12q15	7q31.2	7p11.2	7p12.1	12q14.1	12q14.2	12q15	4q12	17q25.1	7p11.2	7q21.3	1p36.21	1q23.1	3q26.31	7q11.23	7q32.3	13q34	12q12	8q24.22	6p21.1	12q14.3	7p12.2	7p14.3	19q13.2	9q34.3	12q15	19q13.11	13q33.1	2p25.2	2p25.2	2p25.2	2p25.2
q value	1.2565e-193	1.0344e-191	1.6496e-47	3.354e-34	4.7354e-33	1.9573e-21	4.1598e-06	1.556e-05	3.0611e-08	0.00064273	8.9991e-11	0.00064273	0.00040601	1.9362e-08	0.0065324	6.5732e-15	2.5538e-09	0.0031112	0.0053731	0.013127	9.8065e-09	0.030984	3.2944e-28	0.003857	0.049273	0.055902	0.0070519	0.030062	0.065616	0.04618	0.075019	0.081376	0.11279	0.083648	0.0077595	0.16158	0.10449	0.18315	0.13813	0.11772	0.12562	0.16158	0.16158	0.16158	0.16719
residual q value	5.9223e-92	9.5687e-80	9.3956e-45	3.354e-34	1.4907e-31	2.5763e-19	4.1598e-06	7.0877e-05	0.00018633	0.0008562	0.001394	0.001785	0.0032169	0.0050264	0.0065324	0.0065489	0.0097113	0.011033	0.014687	0.017272	0.029333	0.030984	0.041052	0.041355	0.049273	0.055902	0.060897	0.062498	0.065616	0.069348	0.075019	0.081376	0.11279	0.1139	0.15619	0.16158	0.17185	0.18315	0.18315	0.1965	0.20044	0.23132	0.23132	0.23132	0.23902
wide peak boundaries	chr7:54919185-54948806	chr7:55177672-55195273	chr12:57731613-57750971	chr1:204467054-204519462	chr4:54274709-54286650	chr12:68778272-68876681	chr12:4265208-4327510	chr3:181406703-181577827	chr12:58600324-58638005	chr12:68142849-68154734	chr12:58176019-58191847	chr12:63214119-63247088	chr7:92611015-92798059	chr12:69630499-69648193	chr7:116740377-116751496	chr7:56634562-57130953	chr7:52700825-52713778	chr12:61440969-61476492	chr12:64141936-64192528	chr12:67466098-67561688	chr4:48066810-52705510	chr17:75434383-75465848	chr7:56038071-56075061	chr7:93857565-95084584	chr1:12774145-15374619	chr1:156870577-158330515	chr3:173990942-174068882	chr7:75777795-75976790	chr7:130510865-131974164	chr13:112027072-112077054	chr12:41389399-41425731	chr8:124367165-132680632	chr6:43724222-44096326	chr12:66831715-66860304	chr7:49994756-50011591	chr7:27886027-29499661	chr19:38897077-39092519	chr9:137489246-137572470	chr12:68345837-68638056	chr19:34581476-34634001	chr13:102946296-103086940	chr2:5092124-5249528	chr2:4909600-5026973	chr2:4862331-4885469	chr2:5798455-5856109
genes in wide peak	[EGFR]	EGFR	CDK4	MDM4	PDGFRA	CPM	CCND2	SOX2-OT	LOC100506869	[IFNG]	[LOC105369785]	[AVPR1A]	CDK6	BEST3	MET	ZNF479	[POM121L12]	[FAM19A2]	SRGAP1	LOC100507175	SGCB	TMEM94	CCT6A	COL1A2	PRDM2	CD1A	NLGN1	POR	MKLN1	SOX1	PDZRN4	ADCY8	VEGFA	[GRIP1]	ZPBP	CHN2	NFKBIB	MRPL41	RAP1B	SCGB2B2	SLC10A2	[LINC01248]	[LINC01249]	[LINC01249]	[LINC01105]
		EGFR-AS1	TSPAN31	PIK3C2B		MDM2	TIGAR	LOC102724604	LOC101927653							LOC401357			C12orf66		TEC		PSPH	GNG11	PDPN	CD1B		CCL24	PODXL	LINC00403		KCNQ3	C6orf223			CREB5	MRPS12	DPH7	SNORA70G	SCGB1B2P
			AGAP2			LOC100130075	CCND2-AS1									LOC100130849					TXK		SUMF2	GNGT1	KAZN	CD1C		CCL26	COPG2			MYC	LINC01512			TRIL	SIRT2	PNPLA7	LOC100507195
			MIR6759													MIR4283-2					DCUN1D4		SNORA15	TFPI2	TMEM51	CD1D		RHBDD2	COPG2IT1			NDUFB9	LOC101929705			CPVL	SARS2
																MIR4283-1					OCIAD1			SGCE	PRAMEF1	CD5L		SNORA14A	TSGA13			POU5F1B				JAZF1	FBXO17
																					SLAIN2			BET1	PRAMEF2	ETV3		MIR4651	KLF14			PVT1				JAZF1-AS1	FBXO27
																					USP46			PEG10	FHAD1	NTRK1			LINC-PINT			SQLE				LOC100506497	ACP7
																					CWH43			PPP1R9A	LRRC38	ARHGEF11			MIR29A			MTSS1				LOC101928168	CCER2
																					OCIAD2			CASD1	TMEM51-AS1	KIRREL			MIR29B1			KIAA0196				LOC102724484
																					SPATA18			LOC105375401	PRAMEF5	FCRL2			LOC100506860			HHLA1
																					SLC10A4				HNRNPCL1	FCRL5			MKLN1-AS			TRIB1
																					FRYL				PRAMEF10	FCRL4			LOC101928782			RNF139
																					ZAR1				PRAMEF12	FCRL1						EFR3A
																					LRRC66				PRAMEF8	FCRL3						LRRC6
																					USP46-AS1				PRAMEF18	LRRC71						ASAP1-IT1
																									PRAMEF17	CYCSP52						ASAP1
																									PRAMEF4	PEAR1						FAM49B
																									PRAMEF13	ETV3L						TRMT12
																									PRAMEF11	LOC646268						GSDMC
																									PRAMEF6	MIR765						TATDN1
																									HNRNPCL2	LOC105371458						HPYR1
																									PRAMEF7							CCDC26
																									PRAMEF25							ZNF572
																									PRAMEF26							TMEM65
																									PRAMEF33P							LINC00964
																									PRAMEF19							FAM84B
																									PRAMEF20							NSMCE2
																									PRAMEF34P							TMEM75
																									HNRNPCL3							CASC8
																									PRAMEF22							LINC00977
																									PRAMEF15							OC90
																									C1orf195							LINC00861
																									PRAMEF14							CASC11
																									HNRNPCL4							MIR1205
																									PRAMEF27							MIR1206
																																MIR1207
																																MIR1204
																																MIR1208
																																MIR3686
																																CCAT1
																																ASAP1-IT2
																																MIR4662A
																																MIR4662B
																																PCAT1
																																MIR5194
																																CCAT2
																																PRNCR1
																																RNF139-AS1
																																LOC101927657
																																LINC00824
																																MIR6844
																																CASC21
																																CASC19
																																PCAT2
																																LOC105375744
Type	Chromosome	Start	End	#NAME?	G-score	average amplitude	frequency
Amp	1	3302046	3312694	0	0.030303	0.406238	0.134615
Amp	1	3318904	3362760	0	0.041167	0.438333	0.134615
Amp	1	3364250	3463493	0	0.038744	0.447144	0.129808
Amp	1	3477686	3698133	0	0.027879	0.408476	0.125
Amp	1	3699387	3730476	0	0.020927	0.358481	0.115385
Amp	1	3731781	4028279	0	0.023179	0.396392	0.125
Amp	1	4029199	5632096	0	0.020927	0.362542	0.115385
Amp	1	5633477	6373069	0	0.030391	0.383586	0.120192
Amp	1	6389578	6459544	0	0.020927	0.361174	0.105769
Amp	1	6479261	6482270	0	0.029591	0.376632	0.110577
Amp	1	6487610	6610335	0	0.038101	0.393931	0.115385
Amp	1	6628798	9623763	0	0.029591	0.376632	0.110577
Amp	1	9635806	9690399	0.302078	0.071561	0.493822	0.120192
Amp	1	9695116	9741283	0.441386	0.080144	0.502644	0.125
Amp	1	9743528	9821054	0.302078	0.071561	0.493822	0.120192
Amp	1	9830913	10172476	0	0.029591	0.362029	0.115385
Amp	1	10175981	10251819	0	0.035349	0.371271	0.125
Amp	1	10251854	10385876	0	0.029591	0.367068	0.120192
Amp	1	10387735	10440758	0	0.041369	0.402623	0.115385
Amp	1	10442653	11129152	0	0.029591	0.361365	0.115385
Amp	1	11130589	11283687	0	0.037453	0.361449	0.129808
Amp	1	11287435	11344575	0	0.044539	0.375888	0.139423
Amp	1	11351375	11724432	0	0.037453	0.368379	0.134615
Amp	1	11730561	11829411	0	0.043482	0.375204	0.139423
Amp	1	11832308	12414685	0	0.037453	0.368379	0.134615
Amp	1	12422206	12480821	0	0.047023	0.391394	0.139423
Amp	1	12485442	12774437	0	0.037453	0.374688	0.134615
Amp	1	13468357	13522539	0.468053	0.081661	0.490913	0.139423
Amp	1	13526432	13536255	0.302078	0.072997	0.482848	0.134615
Amp	1	13545447	14028707	1.30739	0.116174	0.592297	0.139423
Amp	1	14032312	14440173	0.302078	0.072997	0.482848	0.134615
Amp	1	14440581	14706064	0.333572	0.074572	0.471451	0.139423
Amp	1	14707632	14876233	0.369658	0.076189	0.46411	0.144231
Amp	1	14876761	15151570	0.459151	0.081074	0.465131	0.149038
Amp	1	15152313	15180824	0.635795	0.090873	0.476588	0.153846
Amp	1	15181287	15214577	0.947741	0.104055	0.495189	0.158654
Amp	1	15215577	15306093	0.900934	0.102438	0.491028	0.158654
Amp	1	15310226	15372931	0.678758	0.092639	0.48038	0.153846
Amp	1	15373921	15522508	0	0.048431	0.373859	0.149038
Amp	1	15527759	15632869	0	0.046856	0.378779	0.144231
Amp	1	15633391	15681259	0	0.052858	0.384479	0.149038
Amp	1	15685529	15844541	0	0.039676	0.360948	0.144231
Amp	1	15850269	16080825	0	0.050466	0.378978	0.149038
Amp	1	16082309	16082309	0.020635	0.057719	0.398333	0.149038
Amp	1	16086770	16229574	0.050112	0.058997	0.389188	0.153846
Amp	1	16230214	16303531	0	0.048208	0.37207	0.149038
Amp	1	16304450	16399755	0	0.039689	0.34934	0.149038
Amp	1	16407019	17003142	0	0.033687	0.342468	0.144231
Amp	1	17003654	18259926	0	0.030067	0.337568	0.139423
Amp	1	18260321	18282685	0	0.031624	0.342633	0.144231
Amp	1	18282752	18618140	0	0.030067	0.343625	0.139423
Amp	1	18618717	18635601	0.071877	0.059986	0.414858	0.144231
Amp	1	18637527	18848253	0.24127	0.067748	0.422186	0.149038
Amp	1	18852610	19090285	0	0.037828	0.350424	0.144231
Amp	1	19090624	19243289	0	0.045014	0.358491	0.149038
Amp	1	19243410	19480356	0	0.037828	0.343352	0.139423
Amp	1	19482144	19898256	0	0.030067	0.332686	0.134615
Amp	1	19899346	20218342	0	0.039735	0.354656	0.139423
Amp	1	20222533	20297531	0	0.048393	0.367754	0.144231
Amp	1	20301623	20359669	0	0.054708	0.373224	0.149038
Amp	1	20360476	20424068	0	0.048393	0.367754	0.144231
Amp	1	20431547	20875968	0	0.039735	0.354656	0.139423
Amp	1	20882749	21154215	0	0.030067	0.351754	0.134615
Amp	1	21156430	21227826	0	0.041747	0.37294	0.139423
Amp	1	21231198	21452015	0	0.030067	0.343503	0.129808
Amp	1	21453405	22591772	0	0.028789	0.358517	0.129808
Amp	1	22595533	23019076	0	0.037436	0.370562	0.144231
Amp	1	23022239	23515054	0	0.029573	0.360913	0.139423
Amp	1	23517765	24034260	0	0.020927	0.341745	0.129808
Amp	1	24040251	25371978	0	0.04941	0.414878	0.139423
Amp	1	25373504	26056634	0.111445	0.062156	0.431106	0.144231
Amp	1	26056678	26212399	0	0.04941	0.406198	0.139423
Amp	1	26212565	26241674	0	0.056333	0.411928	0.144231
Amp	1	26243518	26380904	0	0.04941	0.406198	0.139423
Amp	1	26383013	26522133	0	0.054037	0.419595	0.139423
Amp	1	26523804	26634065	0	0.04941	0.404699	0.134615
Amp	1	26636918	26831853	0	0.020927	0.332423	0.129808
Amp	1	26837815	27141528	0	0.027777	0.342527	0.134615
Amp	1	27146307	27217032	0	0.03033	0.338512	0.139423
Amp	1	27221387	27378398	0	0.027777	0.342527	0.134615
Amp	1	27381792	27480051	0	0.020927	0.337238	0.134615
Amp	1	27481107	27518482	0	0.055016	0.433366	0.134615
Amp	1	27522032	27910082	0	0.020927	0.344977	0.129808
Amp	1	27910171	28062358	0	0.027213	0.351226	0.134615
Amp	1	28064554	28872925	0	0.033639	0.358227	0.139423
Amp	1	28882444	29218132	0.120376	0.062362	0.41885	0.149038
Amp	1	29225504	29429245	0	0.055935	0.41985	0.139423
Amp	1	29429554	30489556	0.009742	0.057305	0.427274	0.139423
Amp	1	30489627	30666733	0.120376	0.062621	0.43973	0.139423
Amp	1	30667100	30934781	0.24127	0.067769	0.459765	0.144231
Amp	1	30935209	30988454	0.120376	0.062621	0.443824	0.144231
Amp	1	30988591	31141173	0.096053	0.061251	0.440048	0.144231
Amp	1	31143757	31194011	0	0.055935	0.432108	0.139423
Amp	1	31196956	31227565	0.061324	0.059814	0.435095	0.144231
Amp	1	31228049	31364785	0	0.055935	0.424402	0.144231
Amp	1	31368772	31416063	0.111445	0.06182	0.428305	0.149038
Amp	1	31417179	31572874	0.302078	0.072713	0.457603	0.149038
Amp	1	31576149	31737650	0.195749	0.066427	0.454382	0.144231
Amp	1	31738462	31871183	0	0.055534	0.428246	0.139423
Amp	1	31872990	31883126	0.12554	0.063359	0.441617	0.149038
Amp	1	31886238	32096376	0.278852	0.069944	0.447395	0.153846
Amp	1	32099514	32195458	0.111445	0.062119	0.440665	0.149038
Amp	1	32199242	32306025	0	0.055534	0.43447	0.144231
Amp	1	32309746	33529268	0	0.04965	0.430644	0.139423
Amp	1	33534887	33748002	0	0.051077	0.422512	0.149038
Amp	1	33751057	33857886	0	0.022354	0.357397	0.144231
Amp	1	33861981	33998178	0	0.031378	0.361785	0.153846
Amp	1	34002353	34858468	0	0.022354	0.349377	0.149038
Amp	1	34862511	34868248	0	0.020927	0.351801	0.144231
Amp	1	34873638	34892259	0	0.028586	0.363072	0.149038
Amp	1	34900733	35144061	0	0.020927	0.351801	0.144231
Amp	1	35145912	35179080	0	0.031877	0.371852	0.149038
Amp	1	35179742	35650442	0	0.020927	0.351801	0.144231
Amp	1	35651142	35695796	0	0.028964	0.359443	0.149038
Amp	1	35697192	35954999	0	0.020927	0.348512	0.144231
Amp	1	35956954	35960341	0	0.026942	0.355501	0.149038
Amp	1	35962735	36012683	0	0.039507	0.38903	0.149038
Amp	1	36031425	36467023	0	0.033492	0.383159	0.144231
Amp	1	36469066	36584926	0	0.034866	0.389396	0.153846
Amp	1	36589220	37758989	0	0.0223	0.356323	0.153846
Amp	1	37765397	38772492	0	0.020927	0.393292	0.153846
Amp	1	38774485	38959842	0	0.024437	0.420468	0.144231
Amp	1	38964507	41030342	0	0.020927	0.401376	0.149038
Amp	1	41032636	43948620	0	0.01317	0.379039	0.144231
Amp	1	43948819	44136534	0	0.021918	0.403326	0.149038
Amp	1	44136710	44928697	0	0.01317	0.392445	0.144231
Amp	1	44931247	45071859	0	0.011537	0.39916	0.139423
Amp	1	45082437	45226820	0	0.013429	0.393159	0.144231
Amp	1	45228858	45443839	0	0.022248	0.404892	0.149038
Amp	1	45448171	45460823	0	0.013429	0.391403	0.139423
Amp	1	45463917	45666099	0	0.022576	0.417495	0.139423
Amp	1	45666664	47441932	0	0.013429	0.403442	0.139423
Amp	1	47441990	47510975	0	0.014773	0.428333	0.134615
Amp	1	47514220	47885127	0	0.021824	0.449162	0.134615
Amp	1	47887027	47905443	0	0.014773	0.427956	0.134615
Amp	1	47915569	48141206	0	0.028704	0.454627	0.139423
Amp	1	48141985	48216362	0	0.03144	0.452583	0.144231
Amp	1	48232680	48724562	0	0.028704	0.454002	0.139423
Amp	1	48727722	48786784	0	0.014773	0.427309	0.134615
Amp	1	48801899	49749832	0	0.012881	0.435019	0.129808
Amp	1	49754101	50587561	0	0.01535	0.428727	0.134615
Amp	1	50588335	50644702	0	0.012881	0.434722	0.129808
Amp	1	50649082	50698088	0	0.011537	0.430604	0.129808
Amp	1	50708658	50949927	0	0	0.410282	0.125
Amp	1	50972693	51002880	0	0.013043	0.436773	0.125
Amp	1	51003082	51003082	0	0.01497	0.425857	0.134615
Amp	1	51009929	51412493	0	0.017415	0.424529	0.139423
Amp	1	51414046	52499785	0	0.01497	0.422456	0.134615
Amp	1	52502019	54112427	0	0.013434	0.417919	0.134615
Amp	1	54114339	54127583	0	0.02311	0.433767	0.139423
Amp	1	54128590	63002286	0	0.013434	0.420474	0.134615
Amp	1	63003832	63087558	0	0.027818	0.458019	0.139423
Amp	1	63090642	63773053	0	0.013434	0.416991	0.139423
Amp	1	63775815	63810447	0	0.014831	0.431885	0.134615
Amp	1	63811364	64722815	0	0.021754	0.452338	0.134615
Amp	1	64724571	65039666	0	0.024426	0.460968	0.134615
Amp	1	65042903	65636223	0	0.021754	0.45004	0.134615
Amp	1	65636475	65838170	0	0.014831	0.440698	0.129808
Amp	1	65839672	66087114	0	0.022453	0.448278	0.134615
Amp	1	66093076	66464960	0	0.014831	0.443034	0.129808
Amp	1	66465687	66518190	0	0.025242	0.455854	0.134615
Amp	1	66520874	67957395	0	0.014831	0.44018	0.129808
Amp	1	67959032	68206133	0	0.024751	0.44707	0.139423
Amp	1	68213587	68382998	0	0.014831	0.434012	0.134615
Amp	1	68385885	68752725	0	0.022216	0.457273	0.134615
Amp	1	68757820	69407677	0	0.014831	0.433804	0.134615
Amp	1	69408016	70073683	0	0.016557	0.432929	0.134615
Amp	1	70076746	70081853	0.050112	0.058808	0.557751	0.134615
Amp	1	70085275	72166591	0	0.014831	0.442969	0.129808
Amp	1	72167620	72716603	0	0.025957	0.475771	0.129808
Amp	1	72716618	75143364	0	0.014831	0.433882	0.129808
Amp	1	75146130	80158610	0	0.012904	0.442029	0.125
Amp	1	80159146	80209844	0	0.021741	0.451352	0.129808
Amp	1	80211747	81082000	0	0.012904	0.439986	0.125
Amp	1	81084277	81271752	0	0.023184	0.455504	0.129808
Amp	1	81273275	84270250	0	0.012904	0.439986	0.125
Amp	1	84277649	84375437	0	0.022283	0.442623	0.134615
Amp	1	84377373	85060873	0	0.012904	0.429941	0.129808
Amp	1	85061090	85303814	0	0.015749	0.429603	0.134615
Amp	1	85304141	85951071	0	0.012904	0.429941	0.129808
Amp	1	85951289	91025542	0	0.014673	0.42205	0.134615
Amp	1	91031472	93474533	0	0.001769	0.416811	0.120192
Amp	1	93476885	93785710	0	0.011865	0.420581	0.129808
Amp	1	93799040	93838789	0	0.035395	0.458769	0.139423
Amp	1	93842650	94090511	0	0.011865	0.420581	0.129808
Amp	1	94092253	94203114	0	0.001769	0.404638	0.125
Amp	1	94206413	94627109	0	0.011013	0.418891	0.129808
Amp	1	94627767	94908444	0	0.025345	0.4628	0.129808
Amp	1	94910808	95014795	0	0.035877	0.480163	0.134615
Amp	1	95015783	95140749	0	0.025345	0.4628	0.129808
Amp	1	95145134	95298949	0	0.011013	0.418099	0.129808
Amp	1	95302958	99621606	0	0.001769	0.403815	0.125
Amp	1	99621983	99912706	0	0.012251	0.410123	0.134615
Amp	1	99916833	104853915	0	0.001769	0.392881	0.129808
Amp	1	104856441	109942873	0	0	0.446508	0.110577
Amp	1	109947719	110017996	0	0.00718	0.449754	0.115385
Amp	1	110027454	111665725	0	0	0.443394	0.110577
Amp	1	111666031	111832277	0	0.008642	0.458097	0.115385
Amp	1	111832321	111852970	0	0.018416	0.473856	0.120192
Amp	1	111859428	112008767	0	0.009774	0.460422	0.115385
Amp	1	112015853	114736201	0	0	0.444822	0.110577
Amp	1	114742891	116785353	0	0.001357	0.441022	0.105769
Amp	1	116790857	116881008	0	0.012339	0.463606	0.110577
Amp	1	116883820	119491226	0	0.001357	0.442996	0.105769
Amp	1	119494326	119737785	0	0.003143	0.434839	0.100962
Amp	1	119737931	119765652	0	0.047045	0.581294	0.105769
Amp	1	119766352	119767245	0	0.003143	0.434839	0.100962
Amp	1	119787757	119871935	0	0.004375	0.419706	0.105769
Amp	1	119872922	119882997	0	0.003143	0.434839	0.100962
Amp	1	119883180	119984738	0	0.001357	0.427072	0.100962
Amp	1	119984772	119984772	0	0.015276	0.419219	0.134615
Amp	1	146716041	149949665	0	0.019659	0.42557	0.153846
Amp	1	149952216	150030136	0	0.010896	0.406201	0.153846
Amp	1	150034478	150120822	0	0.049409	0.503668	0.153846
Amp	1	150121640	150158230	0.020635	0.057722	0.510332	0.158654
Amp	1	150158332	150196378	0	0.056364	0.503219	0.158654
Amp	1	150202007	150290062	0	0.017851	0.414805	0.153846
Amp	1	150294432	150377292	0	0.028816	0.425777	0.163462
Amp	1	150494291	150684648	0	0.035896	0.431033	0.168269
Amp	1	150685068	150954676	0	0.028816	0.425777	0.163462
Amp	1	150957211	150973131	0	0.020058	0.404468	0.163462
Amp	1	150977586	151231796	0.020635	0.058006	0.496793	0.163462
Amp	1	151237523	151616339	0	0.03023	0.429216	0.163462
Amp	1	151616994	152152082	0	0.03195	0.435734	0.163462
Amp	1	152158692	152546733	0	0.056804	0.489027	0.168269
Amp	1	152618486	152815243	0	0.03195	0.434621	0.168269
Amp	1	152816957	152886864	0	0.049699	0.476569	0.168269
Amp	1	152887683	152955563	0	0.03195	0.434096	0.168269
Amp	1	152957778	153035713	0	0.019572	0.403715	0.168269
Amp	1	153041606	153050084	0	0.051374	0.478876	0.168269
Amp	1	153055402	153069427	0	0.019572	0.410748	0.163462
Amp	1	153069479	153177654	0	0.020971	0.41445	0.163462
Amp	1	153179146	153201304	0	0.049645	0.472309	0.168269
Amp	1	153203890	153220353	0	0.023168	0.409733	0.168269
Amp	1	153220702	153238306	0	0.046549	0.464994	0.168269
Amp	1	153238332	153322072	0	0.044829	0.459639	0.168269
Amp	1	153322177	153568097	0.120376	0.06264	0.495901	0.168269
Amp	1	153572621	153645794	0.302078	0.072311	0.494648	0.177885
Amp	1	153646290	153673906	0.120376	0.06264	0.486167	0.173077
Amp	1	153676326	154052971	0	0.04247	0.446424	0.168269
Amp	1	154056974	154195150	0	0.050773	0.463337	0.168269
Amp	1	154197028	154266807	0.036759	0.058254	0.468151	0.173077
Amp	1	154274778	154286014	0	0.042264	0.431409	0.173077
Amp	1	154289227	154319760	0	0.033961	0.424112	0.168269
Amp	1	154330033	154362941	0	0.043902	0.447607	0.168269
Amp	1	154369831	154372448	0	0.050014	0.451564	0.173077
Amp	1	154372912	154372912	0.061324	0.05943	0.460411	0.177885
Amp	1	154382775	154408308	0.291899	0.070363	0.484853	0.177885
Amp	1	154413573	154512673	0.12554	0.062882	0.480637	0.173077
Amp	1	154517276	154563091	0	0.034778	0.426016	0.168269
Amp	1	154565729	154575785	0	0.049988	0.461964	0.168269
Amp	1	154579119	154649159	0	0.040572	0.452643	0.163462
Amp	1	154650092	155168172	0	0.056204	0.491771	0.163462
Amp	1	155173638	155176826	0.12554	0.063276	0.495337	0.168269
Amp	1	155182632	155184594	0	0.047645	0.458394	0.168269
Amp	1	155205866	155340652	0	0.056206	0.466445	0.173077
Amp	1	155347062	155347696	0	0.040996	0.431084	0.173077
Amp	1	155348517	155380060	0	0.033923	0.425783	0.168269
Amp	1	155380519	155398680	0	0.040076	0.428184	0.173077
Amp	1	155400011	155557632	0	0.048985	0.436989	0.177885
Amp	1	155559910	155641923	0.096053	0.061484	0.464975	0.177885
Amp	1	155643858	155673356	0.291899	0.070321	0.471974	0.182692
Amp	1	155675026	155745738	0.020635	0.057821	0.444765	0.182692
Amp	1	155748593	155761313	0	0.04926	0.436564	0.177885
Amp	1	155763607	155857993	0	0.043108	0.434462	0.173077
Amp	1	155864236	155897591	0	0.049901	0.437944	0.177885
Amp	1	155898208	155900727	0	0.056211	0.440647	0.182692
Amp	1	155903523	155932844	0	0.047375	0.432801	0.177885
Amp	1	155939632	155945232	0.225902	0.067463	0.467061	0.182692
Amp	1	155948846	156017008	0.403263	0.078354	0.478185	0.1875
Amp	1	156022462	156025224	0.225902	0.067463	0.467061	0.182692
Amp	1	156029780	156048281	0.096053	0.061351	0.463736	0.177885
Amp	1	156050607	156205483	0.084532	0.060828	0.475378	0.173077
Amp	1	156208528	156328996	0.120376	0.062679	0.467251	0.177885
Amp	1	156334538	156348599	0.302078	0.071423	0.47679	0.182692
Amp	1	156351363	156413417	0.586054	0.087838	0.513724	0.182692
Amp	1	156415596	156451862	0.417015	0.078929	0.507231	0.177885
Amp	1	156453066	156463391	0.291899	0.070185	0.501175	0.173077
Amp	1	156468952	156662269	0.403263	0.07853	0.508602	0.177885
Amp	1	156662556	156728102	0.111445	0.062115	0.463266	0.182692
Amp	1	156730859	156874278	0	0.05377	0.454814	0.177885
Amp	1	156877337	156915847	1.25257	0.114392	0.574811	0.182692
Amp	1	156916588	156932489	1.05729	0.108082	0.575735	0.177885
Amp	1	156932572	157019615	1.1059	0.109549	0.580235	0.177885
Amp	1	157020942	157024075	1.05729	0.107699	0.5915	0.173077
Amp	1	157027096	157035076	0.996791	0.1063	0.588286	0.173077
Amp	1	157035362	157348735	0.859727	0.100746	0.575525	0.173077
Amp	1	157351954	157406671	0.996791	0.1063	0.600938	0.168269
Amp	1	157407629	157525585	0.604991	0.089885	0.562133	0.168269
Amp	1	157527473	157828185	0.360417	0.07612	0.528305	0.168269
Amp	1	157828210	158324152	0.601754	0.0893	0.559456	0.168269
Amp	1	158326364	158544421	0	0.045093	0.477903	0.158654
Amp	1	158544436	158545295	0	0.021094	0.417745	0.158654
Amp	1	158580102	159128584	0	0.044532	0.476498	0.158654
Amp	1	159128665	160125754	0	0.019319	0.423932	0.153846
Amp	1	160125835	160244310	0	0.028052	0.433163	0.158654
Amp	1	160246329	161957073	0	0.019319	0.423932	0.153846
Amp	1	161959375	162369313	0	0.0285	0.444489	0.158654
Amp	1	162372413	163371709	0	0.019319	0.427963	0.158654
Amp	1	163372095	163421906	0	0.029145	0.439053	0.163462
Amp	1	163424789	164892938	0	0.019319	0.426902	0.158654
Amp	1	164895704	164946982	0	0.044801	0.478489	0.163462
Amp	1	164949372	165014356	0	0.019319	0.426902	0.158654
Amp	1	165014760	165119494	0	0.011006	0.417631	0.153846
Amp	1	165122048	165134433	0	0.019427	0.42713	0.158654
Amp	1	165138144	165404065	0	0.011006	0.418425	0.153846
Amp	1	165405803	166558848	0	0.019239	0.426659	0.158654
Amp	1	166567447	166859227	0	0.011006	0.414286	0.153846
Amp	1	166859632	166863962	0	0.019094	0.423191	0.158654
Amp	1	166864903	166970858	0	0.011006	0.413204	0.153846
Amp	1	166977119	167274330	0	0.018768	0.420146	0.158654
Amp	1	167283414	170001262	0	0.011006	0.411932	0.153846
Amp	1	170001863	170543136	0	0.015295	0.430138	0.149038
Amp	1	170544770	172376598	0	0.011006	0.419149	0.149038
Amp	1	172377034	172399617	0	0.018447	0.427426	0.153846
Amp	1	172399827	172500331	0	0.038886	0.480261	0.153846
Amp	1	172500567	172821813	0	0.024474	0.443006	0.153846
Amp	1	172821998	173089884	0	0.033551	0.453459	0.158654
Amp	1	173094255	173123445	0	0.046642	0.486273	0.158654
Amp	1	173125430	173139256	0	0.02426	0.430167	0.158654
Amp	1	173141814	173415339	0	0.046363	0.485572	0.158654
Amp	1	173416122	173430923	0	0.020084	0.430673	0.153846
Amp	1	173433916	173672311	0	0.033103	0.452886	0.158654
Amp	1	173674962	174189306	0	0.020084	0.430673	0.153846
Amp	1	174191205	174290737	0	0.011006	0.419149	0.149038
Amp	1	174300036	174916790	0	0.025208	0.44547	0.153846
Amp	1	174918189	175236035	0	0.03435	0.457814	0.158654
Amp	1	175240742	175445468	0	0.025208	0.449945	0.153846
Amp	1	175448061	175456045	0	0.038334	0.483877	0.153846
Amp	1	175458019	175800018	0	0.026585	0.453504	0.153846
Amp	1	175802710	177326464	0	0.02374	0.443938	0.153846
Amp	1	177328851	179885662	0	0.009539	0.417568	0.149038
Amp	1	179886265	180466808	0	0.02352	0.441184	0.153846
Amp	1	180469760	180723846	0	0.033029	0.451845	0.158654
Amp	1	180733019	180952767	0	0.02352	0.441184	0.153846
Amp	1	180961198	184952333	0	0.019137	0.442633	0.149038
Amp	1	184952449	185400901	0	0.005155	0.401146	0.149038
Amp	1	185402973	185507583	0	0.019073	0.422053	0.158654
Amp	1	185517348	187244481	0	0.005155	0.405007	0.149038
Amp	1	187250588	192762677	0	0.017686	0.429708	0.153846
Amp	1	192765206	193785389	0	0.012531	0.434632	0.144231
Amp	1	193785676	194105420	0	0.024152	0.46701	0.144231
Amp	1	194111697	195460633	0	0.012531	0.434966	0.144231
Amp	1	195463129	195607715	0	0	0.413335	0.139423
Amp	1	195610091	195706440	0	0.015313	0.444035	0.144231
Amp	1	195707113	195771973	0	0	0.413335	0.139423
Amp	1	195774920	195792499	0	0.035495	0.501995	0.144231
Amp	1	195794745	195845605	0	0.012424	0.438383	0.144231
Amp	1	195845753	195851760	0	0.036767	0.505503	0.144231
Amp	1	195906930	196006438	0	0.012424	0.436068	0.144231
Amp	1	196006603	196729142	0	0	0.413335	0.139423
Amp	1	196973325	197097210	0	0.039218	0.511355	0.144231
Amp	1	197103165	198451609	0	0	0.403218	0.144231
Amp	1	198456622	198590280	0	0.040908	0.5188	0.144231
Amp	1	198595327	201559360	0	0	0.414181	0.139423
Amp	1	201563175	202026298	0	0.007218	0.382319	0.153846
Amp	1	202029403	202111200	0	0.051322	0.502741	0.158654
Amp	1	202113944	202116635	0	0.007218	0.404175	0.153846
Amp	1	202121513	202289576	0	0.016189	0.414549	0.158654
Amp	1	202292273	202309153	0	0.008971	0.40841	0.153846
Amp	1	202311172	202562613	0	0.044104	0.499358	0.153846
Amp	1	202563185	202698364	0.598533	0.088304	0.59504	0.158654
Amp	1	202700755	202716152	1.19921	0.112492	0.638377	0.163462
Amp	1	202718579	202726291	0.598533	0.088304	0.59504	0.158654
Amp	1	202735949	202749847	0.900934	0.102266	0.613496	0.163462
Amp	1	202755787	202772138	3.6444	0.190566	0.782571	0.173077
Amp	1	202773487	202821378	3.17057	0.176604	0.770001	0.168269
Amp	1	202824715	202853133	1.76688	0.132397	0.685093	0.163462
Amp	1	202867255	203092122	2.1517	0.145373	0.699604	0.168269
Amp	1	203099256	203176173	2.35629	0.151936	0.715117	0.168269
Amp	1	203176865	203269440	3.69122	0.192146	0.810727	0.168269
Amp	1	203269579	203281365	5.35648	0.236072	0.889786	0.173077
Amp	1	203286365	203307925	5.7264	0.244955	0.888017	0.177885
Amp	1	203309855	203310238	9.30778	0.332702	1.03001	0.1875
Amp	1	203311166	203383007	11.2342	0.376909	1.09568	0.192308
Amp	1	203384085	203392045	10.9419	0.370346	1.10688	0.1875
Amp	1	203396231	203445002	10.5794	0.361463	1.11431	0.182692
Amp	1	203445730	203579741	10.7132	0.364972	1.09318	0.1875
Amp	1	203585720	203640751	11.562	0.384418	1.10649	0.192308
Amp	1	203642973	203657236	13.5808	0.427367	1.19531	0.192308
Amp	1	203662623	203669100	13.0728	0.416589	1.17302	0.192308
Amp	1	203671637	203686142	13.1557	0.418419	1.14828	0.197115
Amp	1	203686615	203687102	14.5263	0.447731	1.20742	0.197115
Amp	1	203687846	203697112	16.6158	0.491708	1.26574	0.201923
Amp	1	203703960	203720186	18.7795	0.535915	1.32135	0.206731
Amp	1	203726413	203744005	20.9745	0.580096	1.37443	0.211538
Amp	1	203747619	203751048	23.2281	0.624304	1.42515	0.216346
Amp	1	203755834	203911954	23.5082	0.629721	1.40412	0.221154
Amp	1	203916992	203978777	23.8118	0.635822	1.37019	0.230769
Amp	1	203985822	204063910	22.3399	0.60651	1.31935	0.230769
Amp	1	204066419	204191898	24.5982	0.6505	1.36706	0.235577
Amp	1	204191969	204201529	25.8601	0.675374	1.40905	0.235577
Amp	1	204204259	204288891	24.5982	0.6505	1.36573	0.235577
Amp	1	204291470	204314978	26.879	0.694708	1.41155	0.240385
Amp	1	204315764	204315764	27.5472	0.707509	1.40463	0.245192
Amp	1	204318049	204396101	29.7292	0.748745	1.44508	0.25
Amp	1	204398175	204445951	31.7388	0.786281	1.50479	0.25
Amp	1	204447896	204453480	32.1249	0.793322	1.48742	0.254808
Amp	1	204456194	204467392	32.9859	0.809945	1.51336	0.254808
Amp	1	204473940	204503151	33.4744	0.818575	1.49871	0.259615
Amp	1	204509302	204509302	32.9859	0.809414	1.48467	0.259615
Amp	1	204519463	204519677	32.5882	0.802373	1.50167	0.254808
Amp	1	204519774	204554743	32.1574	0.793743	1.51666	0.25
Amp	1	204560590	204601523	31.2871	0.777613	1.51991	0.245192
Amp	1	204605874	204641522	29.3604	0.741539	1.46139	0.245192
Amp	1	204641652	204657924	28.5775	0.726908	1.49619	0.235577
Amp	1	204660608	204683770	26.236	0.682701	1.45118	0.230769
Amp	1	204685806	204688565	27.6776	0.709781	1.49785	0.230769
Amp	1	204694089	204701606	25.7333	0.673142	1.43276	0.230769
Amp	1	204702747	204758254	24.5982	0.651104	1.39478	0.230769
Amp	1	204764263	204766620	22.5496	0.610894	1.32548	0.230769
Amp	1	204768079	204768389	20.4628	0.569658	1.27905	0.225962
Amp	1	204772104	204809719	19.8046	0.556682	1.25621	0.225962
Amp	1	204809798	204814077	19.5006	0.550372	1.27194	0.221154
Amp	1	204818346	204824449	17.3092	0.506164	1.21895	0.216346
Amp	1	204825907	204844061	15.1895	0.462071	1.16354	0.211538
Amp	1	204848845	204856986	13.1293	0.418094	1.10556	0.206731
Amp	1	204858913	204886838	11.1074	0.374104	1.04481	0.201923
Amp	1	204890543	204920404	7.33972	0.286357	0.914208	0.192308
Amp	1	204921171	204939930	5.60266	0.242149	0.843884	0.1875
Amp	1	204940139	204980698	5.90229	0.250374	0.840144	0.192308
Amp	1	204984218	204985203	4.21819	0.206167	0.76792	0.1875
Amp	1	204987197	204987536	3.74228	0.193562	0.759447	0.182692
Amp	1	204990304	205011779	2.29134	0.149362	0.681138	0.177885
Amp	1	205012770	205042531	2.68306	0.162062	0.691123	0.182692
Amp	1	205044634	205325527	1.3533	0.117881	0.610968	0.177885
Amp	1	205329388	205333793	0.319951	0.073955	0.52636	0.173077
Amp	1	205338661	205355766	0	0.029851	0.436918	0.168269
Amp	1	205364841	205395721	0	0.024434	0.436304	0.163462
Amp	1	205398506	205596213	0	0.011734	0.417387	0.158654
Amp	1	205596750	205728717	0	0.003509	0.408734	0.153846
Amp	1	205728898	205834918	0	0.02925	0.489838	0.149038
Amp	1	205843486	206011429	0	0.003509	0.431201	0.144231
Amp	1	206012359	206097334	0	0.040844	0.519845	0.149038
Amp	1	206100617	206178584	0	0.005066	0.424376	0.149038
Amp	1	206366301	206421718	0	0.030772	0.492967	0.149038
Amp	1	206422085	206459945	0	0.032121	0.496568	0.149038
Amp	1	206463793	206487811	0	0.042095	0.506841	0.153846
Amp	1	206487941	206504398	0.020635	0.057886	0.547663	0.153846
Amp	1	206509625	206683275	0	0.043435	0.510305	0.153846
Amp	1	206683955	207272416	0	0.033461	0.500144	0.149038
Amp	1	207272907	207367636	0	0.029953	0.508196	0.144231
Amp	1	207367868	207494499	0	0.026987	0.50002	0.144231
Amp	1	207494890	207524485	0	0.012957	0.461334	0.144231
Amp	1	207573308	207970141	0	0.029788	0.507744	0.144231
Amp	1	207977561	208054998	0	0.041334	0.525161	0.149038
Amp	1	208055682	208468760	0	0.029788	0.51083	0.144231
Amp	1	208469792	208851000	0	0.041116	0.542487	0.144231
Amp	1	208852516	209165066	0	0.029788	0.511252	0.144231
Amp	1	209166003	209183280	0	0.00135	0.444037	0.139423
Amp	1	209183755	209520354	0	0.002718	0.435462	0.144231
Amp	1	209521627	209575814	0	0.015965	0.472366	0.144231
Amp	1	209576211	209632287	0	0.041649	0.543187	0.144231
Amp	1	209634470	209740893	0	0.015965	0.471986	0.144231
Amp	1	209742064	210092465	0.071877	0.060172	0.581651	0.144231
Amp	1	210100473	210219924	0	0.015965	0.47561	0.139423
Amp	1	210224051	212206399	0	0.00135	0.446792	0.134615
Amp	1	212210584	212277643	0	0.007888	0.450035	0.139423
Amp	1	212278707	213287405	0	0.00135	0.446792	0.134615
Amp	1	213287610	213337888	0	0.003142	0.437276	0.134615
Amp	1	213338936	214399172	0	0.00135	0.447835	0.129808
Amp	1	214399984	214492290	0	0.005791	0.449712	0.134615
Amp	1	214492933	214555657	0	0.00135	0.436364	0.134615
Amp	1	214556090	214698668	0	0.00968	0.460975	0.134615
Amp	1	214709640	214878781	0	0.00135	0.434872	0.134615
Amp	1	214880572	214905103	0	0.022731	0.498039	0.134615
Amp	1	214906874	215646829	0	0.00135	0.434577	0.134615
Amp	1	215648089	215770138	0	0.027127	0.514208	0.134615
Amp	1	215772868	215808716	0	0.030418	0.523933	0.134615
Amp	1	215810060	216268385	0	0.00135	0.449659	0.129808
Amp	1	216269872	216397602	0	0.031104	0.524449	0.134615
Amp	1	216402165	220910410	0	0.00135	0.449659	0.129808
Amp	1	220910596	221082647	0	0	0.425596	0.125
Amp	1	221085364	224147720	0	0.001255	0.443311	0.129808
Amp	1	224149983	224224034	0	0.015917	0.484318	0.134615
Amp	1	224224455	225946771	0	0.001255	0.437296	0.129808
Amp	1	225948890	226270472	0	0.006584	0.440564	0.134615
Amp	1	226273646	226802000	0	0.050792	0.55147	0.139423
Amp	1	226806449	227207593	0	0.049537	0.546503	0.139423
Amp	1	227210098	227467521	0	0.056216	0.546702	0.144231
Amp	1	227480035	227828669	0	0.049537	0.546503	0.139423
Amp	1	227833840	227835767	0.009742	0.057282	0.549892	0.144231
Amp	1	227835924	228209513	0	0.013075	0.442756	0.139423
Amp	1	228219917	229401123	0	0.00533	0.434759	0.134615
Amp	1	229401766	229431142	0	0.016255	0.451913	0.139423
Amp	1	229433750	230632291	0	0.00533	0.434759	0.134615
Amp	1	230632385	230769474	0	0.015328	0.451386	0.139423
Amp	1	230769977	232620280	0	0.00533	0.437682	0.134615
Amp	1	232625370	233266928	0	0.014394	0.447008	0.139423
Amp	1	233266954	233631425	0	0.015777	0.452511	0.139423
Amp	1	233631810	234149469	0	0.006712	0.441288	0.134615
Amp	1	234151657	234757673	0	0.003053	0.430478	0.134615
Amp	1	234759299	234853181	0	0.001383	0.43777	0.125
Amp	1	234854757	234869375	0	0.042674	0.54976	0.129808
Amp	1	234869763	234963855	0	0.001383	0.43777	0.125
Amp	1	234967229	235471683	0	0.002684	0.429498	0.129808
Amp	1	235473866	235498974	0	0.003936	0.417857	0.134615
Amp	1	235500560	236730749	0	0.002684	0.429498	0.129808
Amp	1	236734076	236737237	0	0.004849	0.4226	0.134615
Amp	1	236738518	236957732	0	0.002684	0.43152	0.129808
Amp	1	236958211	236969420	0	0.017743	0.460716	0.134615
Amp	1	236969573	238373208	0	0.002684	0.43152	0.129808
Amp	1	238380041	238586809	0	0.012046	0.461466	0.125
Amp	1	238589211	238675105	0	0.002684	0.448175	0.120192
Amp	1	238685625	238828063	0	0.011903	0.461013	0.125
Amp	1	238839010	238967688	0	0.002684	0.446346	0.120192
Amp	1	238973455	238989801	0	0.006091	0.457877	0.120192
Amp	1	238996311	239310846	0	0.01399	0.46614	0.125
Amp	1	239315768	239537946	0	0.010582	0.455006	0.125
Amp	1	239538349	240095526	0	0.002684	0.446298	0.120192
Amp	1	240103240	240123720	0	0.046891	0.547276	0.134615
Amp	1	240132064	240189960	0	0.002684	0.432106	0.129808
Amp	1	240194337	240196819	0	0.046891	0.547276	0.134615
Amp	1	240203040	240429336	0	0.05623	0.555462	0.134615
Amp	1	240430769	240710781	0	0.046891	0.546474	0.134615
Amp	1	240714856	240883605	0	0.055246	0.551719	0.139423
Amp	1	240884190	240895146	0	0.056696	0.537327	0.144231
Amp	1	240906127	241233352	0	0.055246	0.551719	0.139423
Amp	1	241233990	241263365	0	0.046891	0.546491	0.134615
Amp	1	241263422	241271168	0	0.05445	0.552033	0.139423
Amp	1	241272295	241305018	0	0.046891	0.546491	0.134615
Amp	1	241305386	241781419	0	0.053532	0.55252	0.139423
Amp	1	241781453	241846514	0	0.046891	0.533039	0.139423
Amp	1	241846770	241893326	0	0.050802	0.529058	0.144231
Amp	1	241894238	242511882	0	0.052287	0.537185	0.144231
Amp	1	242514276	242748248	0.071877	0.060212	0.556678	0.144231
Amp	1	242751101	244328282	0	0.052287	0.552209	0.139423
Amp	1	244329609	244402217	0	0.050802	0.54396	0.139423
Amp	1	244403566	244472567	0.061324	0.059821	0.552895	0.144231
Amp	1	244473659	244473659	0	0.050802	0.54396	0.139423
Amp	1	244691519	245640375	0	0.053684	0.533776	0.144231
Amp	1	245642346	245693461	0.120376	0.062637	0.571393	0.139423
Amp	1	245695252	246016006	0	0.023751	0.460474	0.139423
Amp	1	246022678	246917586	0	0.016278	0.429344	0.144231
Amp	1	246921569	246949240	0	0.0278	0.437825	0.153846
Amp	1	246952027	247113628	0	0.016278	0.421046	0.149038
Amp	1	247121237	247176077	0	0.010956	0.420408	0.144231
Amp	1	247176466	247327841	0	0.019062	0.428618	0.149038
Amp	1	247329345	247345275	0	0.010956	0.420408	0.144231
Amp	1	247345497	247590493	0	0.007046	0.420642	0.139423
Amp	1	247592512	247617053	0	0.009474	0.430062	0.139423
Amp	1	247617604	247650984	0	0.01209	0.424209	0.144231
Amp	2	484222	1916869	0	0.015522	0.386221	0.048077
Amp	2	1918353	3321152	0	0.009765	0.346179	0.048077
Amp	2	3322432	3511778	0	0.011083	0.32757	0.052885
Amp	2	3515968	3803868	0	0.015992	0.339376	0.057692
Amp	2	3804012	4327605	0	0.011083	0.311703	0.057692
Amp	2	4331158	4864012	0	0.009765	0.372555	0.043269
Amp	2	4870099	4881630	0.791622	0.098	0.901003	0.057692
Amp	2	4881631	4909754	0	0.009765	0.349833	0.048077
Amp	2	4926088	4956449	0.791622	0.098076	0.901003	0.057692
Amp	2	5026757	5026757	0	0.053869	0.650471	0.052885
Amp	2	5026974	5088290	0	0.009765	0.349833	0.048077
Amp	2	5090758	5092252	0	0.053973	0.607523	0.057692
Amp	2	5093620	5238330	0.791622	0.098076	0.842087	0.0625
Amp	2	5248515	5799481	0	0.009765	0.330311	0.052885
Amp	2	5804366	5852385	0.776795	0.097595	0.840491	0.0625
Amp	2	5856051	7002049	0	0.009765	0.330311	0.052885
Amp	2	7007842	7063197	0.690468	0.093787	0.870807	0.057692
Amp	2	7065218	8939174	0	0.009765	0.348213	0.048077
Amp	2	8941690	8955862	0	0.015621	0.402001	0.048077
Amp	2	8958115	9208926	0	0.025922	0.443761	0.052885
Amp	2	9209524	9227349	0	0.020066	0.439696	0.048077
Amp	2	9233121	9520504	0	0.009765	0.392845	0.043269
Amp	2	9522081	9915175	0	0.015542	0.449528	0.043269
Amp	2	9915795	11385035	0	0.009765	0.396436	0.043269
Amp	2	11385478	11412764	0	0.016332	0.40665	0.052885
Amp	2	11416059	11527221	0	0.02514	0.434592	0.057692
Amp	2	11531271	11613829	0	0.016332	0.40665	0.052885
Amp	2	11616883	13309747	0	0.009765	0.392386	0.048077
Amp	2	13310640	14295672	0	0.010977	0.342546	0.057692
Amp	2	14300319	14819088	0	0.054689	0.590631	0.0625
Amp	2	14824249	15186710	0.12554	0.063463	0.600992	0.067308
Amp	2	15192061	15339051	0.278852	0.070026	0.597251	0.072115
Amp	2	15339527	15352627	0.302078	0.071398	0.606237	0.072115
Amp	2	15354689	15579309	0.120376	0.062624	0.596991	0.067308
Amp	2	15581074	15775902	0.395321	0.077555	0.63953	0.072115
Amp	2	15777390	16016877	0.360417	0.075932	0.664815	0.067308
Amp	2	16022339	16022339	0.690468	0.093263	0.716366	0.072115
Amp	2	16024563	16110149	0.441386	0.079955	0.688904	0.067308
Amp	2	16177242	16960939	0.120376	0.062624	0.631276	0.0625
Amp	2	16961469	17665325	0	0.018912	0.360371	0.0625
Amp	2	17665474	18315428	0	0.0177	0.380398	0.057692
Amp	2	18315566	18347629	0	0.016328	0.36919	0.057692
Amp	2	18347816	18655563	0	0.009765	0.353218	0.052885
Amp	2	18655579	19042418	0	0.010979	0.362349	0.052885
Amp	2	19047454	20291871	0	0.012342	0.374504	0.052885
Amp	2	20294904	20346018	0	0.02	0.395683	0.057692
Amp	2	20349673	20685561	0	0.010235	0.35822	0.052885
Amp	2	20688000	22428981	0	0.002577	0.32939	0.048077
Amp	2	22430403	22886396	0	0.001214	0.317548	0.048077
Amp	2	22887612	23710486	0	0.008828	0.381095	0.048077
Amp	2	23710579	23831550	0	0.003607	0.359418	0.043269
Amp	2	23837051	23840027	0	0.009071	0.396438	0.043269
Amp	2	23840338	24213916	0	0.007857	0.379771	0.043269
Amp	2	24216083	26412574	0	0.002393	0.362411	0.033654
Amp	2	26415454	27767352	0	0.004355	0.313155	0.043269
Amp	2	27768065	28439397	0	0.002393	0.332006	0.038462
Amp	2	28446882	29003693	0	0.011916	0.382644	0.043269
Amp	2	29004515	30723030	0	0.002393	0.332006	0.038462
Amp	2	30731755	31247991	0	0.011415	0.376771	0.043269
Amp	2	31252037	31396096	0	0.006191	0.328756	0.043269
Amp	2	31405658	31955511	0	0.002393	0.330578	0.038462
Amp	2	31957231	33960694	0	0	0.303386	0.038462
Amp	2	33969596	34036031	0	0.012816	0.368901	0.048077
Amp	2	34036583	38516577	0	0	0.292096	0.043269
Amp	2	38516739	40063915	0	0.001475	0.311922	0.038462
Amp	2	40066118	41143238	0	0	0.290956	0.043269
Amp	2	41145494	42995563	0	0.001384	0.304835	0.043269
Amp	2	42995892	43036948	0	0.009939	0.355904	0.043269
Amp	2	43040821	43137056	0	0.018648	0.39235	0.048077
Amp	2	43139492	43184894	0	0.009939	0.355904	0.043269
Amp	2	43189409	45974198	0	0.001384	0.311553	0.038462
Amp	2	45975199	46574638	0	0.008746	0.34524	0.043269
Amp	2	46575795	46584328	0	0.001384	0.346157	0.033654
Amp	2	46586694	47027451	0	0.013089	0.423916	0.038462
Amp	2	47028919	47191934	0	0.023289	0.470719	0.043269
Amp	2	47193970	47233268	0	0.013089	0.423916	0.038462
Amp	2	47233929	48093407	0	0.001384	0.346157	0.033654
Amp	2	48097668	48672011	0	0.010242	0.394483	0.038462
Amp	2	48678817	49861293	0	0.001384	0.320887	0.038462
Amp	2	49861871	50457437	0	0	0.298245	0.043269
Amp	2	50458141	50636524	0	0.002513	0.300717	0.048077
Amp	2	50965967	51130564	0	0.023034	0.436394	0.052885
Amp	2	51133337	51822777	0	0.002513	0.300717	0.048077
Amp	2	51823339	51841188	0	0.004944	0.300242	0.052885
Amp	2	51842412	52681193	0	0.002431	0.281346	0.052885
Amp	2	52681489	53318488	0	0	0.279932	0.048077
Amp	2	53318720	53327873	0	0.039968	0.614068	0.048077
Amp	2	53327980	53640171	0	0	0.283455	0.048077
Amp	2	53640279	55453360	0	0.001297	0.294181	0.048077
Amp	2	55454189	55582616	0	0.009977	0.333422	0.052885
Amp	2	55588556	58235916	0	0.001297	0.294181	0.048077
Amp	2	58240483	58265210	0	0.043687	0.644832	0.048077
Amp	2	58265306	58660039	0	0.001297	0.310162	0.043269
Amp	2	58660105	63618588	0	0	0.297466	0.043269
Amp	2	63622475	63869417	0	0.006316	0.375297	0.038462
Amp	2	63876607	68332731	0	0	0.309285	0.038462
Amp	2	68335048	68404128	0	0.004576	0.298419	0.048077
Amp	2	68406763	69683299	0	0	0.288208	0.043269
Amp	2	69684784	69783703	0	0.008595	0.358795	0.043269
Amp	2	69784820	70085848	0	0	0.309234	0.038462
Amp	2	70089818	70664647	0	0.019633	0.464667	0.043269
Amp	2	70664955	70716884	0	0.024351	0.44672	0.048077
Amp	2	70717360	71559856	0	0.022222	0.427598	0.048077
Amp	2	71560703	72531646	0	0.002589	0.285317	0.043269
Amp	2	72535939	72904038	0	0.022353	0.428293	0.048077
Amp	2	72910305	72949149	0	0.019764	0.452088	0.043269
Amp	2	72952462	73523393	0	0	0.294214	0.038462
Amp	2	73525215	74332875	0	0.008793	0.34234	0.043269
Amp	2	74334953	74435043	0	0.010237	0.357351	0.043269
Amp	2	74446479	74918024	0	0.001444	0.311101	0.038462
Amp	2	74925373	74927809	0	0.010505	0.334278	0.048077
Amp	2	74928228	74999125	0	0.054462	0.63633	0.052885
Amp	2	74999663	75015161	0	0.010505	0.334278	0.048077
Amp	2	75015736	76209015	0	0.001444	0.28797	0.043269
Amp	2	76211904	78654935	0	0	0.276478	0.043269
Amp	2	78656849	79907386	0	0.011745	0.335085	0.052885
Amp	2	79907789	82748107	0	0	0.271441	0.048077
Amp	2	82751087	84470320	0	0.00148	0.289737	0.048077
Amp	2	84473375	84543287	0	0.012308	0.397885	0.043269
Amp	2	84545534	84911202	0	0.020546	0.426238	0.048077
Amp	2	84911891	85654493	0	0.026403	0.474688	0.048077
Amp	2	85657232	85667169	0	0.018166	0.451719	0.043269
Amp	2	85670645	85757764	0	0.008508	0.362953	0.043269
Amp	2	85767909	85828823	0	0.00148	0.316374	0.038462
Amp	2	85831059	86028974	0	0.012189	0.379738	0.043269
Amp	2	86030945	86412951	0	0.00148	0.316374	0.038462
Amp	2	86416624	86439193	0	0.01419	0.398696	0.043269
Amp	2	86443441	86826158	0	0.00148	0.316374	0.038462
Amp	2	86826596	86881088	0	0	0.301068	0.038462
Amp	2	87894092	88071776	0	0.008422	0.346736	0.043269
Amp	2	88071922	88129235	0	0.027299	0.475395	0.048077
Amp	2	88192539	88517574	0	0.018877	0.449096	0.043269
Amp	2	88519174	94740434	0	0	0.301068	0.038462
Amp	2	94745065	95397910	0	0.003913	0.303578	0.043269
Amp	2	95403809	96436097	0	0	0.301068	0.038462
Amp	2	96437496	97012102	0	0.005586	0.320674	0.043269
Amp	2	97012582	97968960	0	0	0.27975	0.043269
Amp	2	97969447	98519051	0	0.006859	0.308513	0.048077
Amp	2	98519164	99853969	0	0	0.283835	0.048077
Amp	2	99857483	100254385	0	0.020016	0.415214	0.052885
Amp	2	100259238	100410389	0	0	0.283835	0.048077
Amp	2	100412540	100497696	0	0.010416	0.374507	0.048077
Amp	2	100498224	101001169	0	0.004667	0.326945	0.048077
Amp	2	101002859	101060720	0	0	0.284435	0.048077
Amp	2	101063584	101106881	0	0.005732	0.335757	0.048077
Amp	2	101107140	101139891	0	0.009634	0.368034	0.048077
Amp	2	101143417	104623999	0	0	0.303238	0.043269
Amp	2	104631167	104722694	0	0.012013	0.379328	0.048077
Amp	2	104725978	105670924	0	0	0.310148	0.043269
Amp	2	105671383	105933013	0	0.028836	0.524993	0.048077
Amp	2	105933971	107015270	0	0	0.310148	0.043269
Amp	2	107024366	107055838	0	0.016129	0.410708	0.048077
Amp	2	107057160	120426580	0	0	0.300248	0.043269
Amp	2	120427309	120551357	0	0.006362	0.333455	0.048077
Amp	2	120551655	120951960	0	0	0.311195	0.043269
Amp	2	120957459	121432055	0	0.008328	0.348963	0.048077
Amp	2	121432496	126887835	0	0	0.311195	0.043269
Amp	2	126889499	126905403	0	0.008285	0.348666	0.052885
Amp	2	126905921	135677348	0	0	0.315	0.048077
Amp	2	135678747	136080273	0	0.011299	0.349799	0.057692
Amp	2	136083136	136490358	0	0	0.296517	0.052885
Amp	2	136492504	136505068	0	0.014515	0.372813	0.057692
Amp	2	136505450	140208980	0	0	0.296517	0.052885
Amp	2	140210739	140417311	0	0.002755	0.291554	0.057692
Amp	2	140417450	140481435	0	0	0.280946	0.048077
Amp	2	140484942	140653435	0	0.005713	0.298365	0.052885
Amp	2	140655514	143410397	0	0	0.298162	0.052885
Amp	2	143412247	143433360	0	0.011906	0.355057	0.057692
Amp	2	143455129	146858781	0	0	0.297268	0.052885
Amp	2	146859270	146964135	0	0.001368	0.295743	0.048077
Amp	2	146964643	147670275	0	0	0.312752	0.043269
Amp	2	147670929	147713893	0	0.001278	0.293791	0.048077
Amp	2	147716228	151728886	0	0	0.312752	0.043269
Amp	2	151737281	152048966	0	0.008119	0.348636	0.048077
Amp	2	152049068	152280676	0	0.018732	0.397293	0.052885
Amp	2	152283920	152366104	0	0.024325	0.387123	0.052885
Amp	2	152369135	152423212	0	0.018732	0.37882	0.048077
Amp	2	152425712	152435126	0	0.010613	0.34629	0.043269
Amp	2	152435660	152475375	0	0.019069	0.382362	0.048077
Amp	2	152476999	152624863	0	0.008456	0.32664	0.043269
Amp	2	152625344	155396545	0	0	0.263407	0.043269
Amp	2	155396598	155456319	0	0.00133	0.26224	0.043269
Amp	2	155456532	155601285	0	0	0.279094	0.038462
Amp	2	155601954	155792028	0	0.0015	0.263802	0.043269
Amp	2	155798099	159099246	0	0	0.279094	0.038462
Amp	2	159100008	159107684	0	0.044208	0.606458	0.048077
Amp	2	159108004	160339999	0	0	0.267525	0.043269
Amp	2	160340357	160360210	0	0.033088	0.508736	0.048077
Amp	2	160361024	171882979	0	0	0.261141	0.043269
Amp	2	171890777	172698121	0	0.007989	0.297577	0.048077
Amp	2	172701405	173938986	0	0	0.257211	0.043269
Amp	2	173940952	174070047	0	0.01086	0.3244	0.048077
Amp	2	174073085	181760586	0	0	0.259226	0.043269
Amp	2	181764838	181829872	0	0.008316	0.284486	0.052885
Amp	2	181838373	184994119	0	0	0.243301	0.048077
Amp	2	184996952	198694453	0	0.003714	0.251746	0.052885
Amp	2	198695441	199555490	0	0.005272	0.254454	0.052885
Amp	2	199556013	204427515	0	0.013221	0.291361	0.057692
Amp	2	204435094	204453879	0	0.022291	0.396457	0.048077
Amp	2	204455162	208375017	0	0.013221	0.320987	0.048077
Amp	2	208375065	208375983	0	0.024786	0.425226	0.048077
Amp	2	208376163	208383783	0	0.044991	0.592362	0.048077
Amp	2	208383929	208550049	0	0.013221	0.329557	0.048077
Amp	2	208553415	209413079	0	0.009507	0.331034	0.043269
Amp	2	209415302	209442935	0	0.049827	0.701622	0.043269
Amp	2	209447809	211822526	0	0.009507	0.326982	0.043269
Amp	2	211822670	214425299	0	0.011057	0.281243	0.052885
Amp	2	214425658	218356900	0	0.009507	0.296169	0.048077
Amp	2	218360181	218462498	0	0.017942	0.38466	0.043269
Amp	2	218472236	218472236	0	0.030765	0.45732	0.048077
Amp	2	218473694	219223786	0	0.02233	0.430326	0.043269
Amp	2	219224044	219493864	0	0.009507	0.345209	0.038462
Amp	2	219503543	219925916	0	0.019747	0.400977	0.043269
Amp	2	219926860	222430740	0	0.009507	0.345209	0.038462
Amp	2	222439670	222976245	0	0.020117	0.403473	0.043269
Amp	2	222976361	230309705	0	0.009507	0.341763	0.038462
Amp	2	230311348	230400636	0	0.017918	0.378071	0.043269
Amp	2	230401563	231225003	0	0.009507	0.337797	0.038462
Amp	2	231226766	231662900	0	0.014551	0.346631	0.043269
Amp	2	231664588	232454022	0	0.009507	0.337797	0.038462
Amp	2	232455267	232899764	0	0.001558	0.292117	0.033654
Amp	2	232902327	233572261	0	0.007736	0.319486	0.038462
Amp	2	233572788	233836743	0	0.016965	0.377673	0.043269
Amp	2	233836809	233838768	0	0.007736	0.32796	0.038462
Amp	2	233841076	234308089	0	0.001558	0.301803	0.033654
Amp	2	234308178	234700935	0	0.017835	0.432751	0.038462
Amp	2	234714546	234942004	0	0.001558	0.301803	0.033654
Amp	2	234947315	235493414	0	0.004636	0.347365	0.033654
Amp	2	235498990	235759792	0	0.010707	0.36685	0.038462
Amp	2	235759994	236369524	0	0.004636	0.347365	0.033654
Amp	2	236382175	240494429	0	0.001558	0.310982	0.033654
Amp	2	240498587	240529520	0	0.018858	0.51425	0.033654
Amp	2	240530641	240670864	0	0	0.329255	0.028846
Amp	2	240671904	240776486	0	0.052459	0.794919	0.038462
Amp	2	240788528	240957001	0	0.008788	0.386072	0.033654
Amp	2	240962658	241297420	0	0	0.329255	0.028846
Amp	2	241303213	241536647	0	0.005907	0.358367	0.033654
Amp	3	2170634	2232383	0	0.017726	0.400859	0.105769
Amp	3	2232532	2245321	0	0.027557	0.418786	0.110577
Amp	3	2245876	2323933	0	0.026093	0.432092	0.105769
Amp	3	2780268	5431158	0	0.016262	0.413945	0.100962
Amp	3	5435675	5458146	0	0.025715	0.437025	0.105769
Amp	3	6105882	6132239	0	0.016262	0.4206	0.100962
Amp	3	6135604	6175287	0	0.022648	0.425686	0.105769
Amp	3	6200680	6221160	0	0.025357	0.435874	0.105769
Amp	3	6221175	8831729	0	0.016262	0.4206	0.100962
Amp	3	8832268	9548462	0	0.023806	0.471778	0.096154
Amp	3	9558120	9607786	0	0.032289	0.488859	0.100962
Amp	3	9613778	9825485	0	0.040005	0.496076	0.105769
Amp	3	9827306	9957590	0	0.048713	0.528818	0.105769
Amp	3	9958223	10079751	0	0.040005	0.50323	0.100962
Amp	3	10080238	10104764	0	0.032289	0.49601	0.096154
Amp	3	10105217	10145397	0	0.039629	0.487692	0.105769
Amp	3	10266508	10266508	0	0.031147	0.455798	0.105769
Amp	3	10266642	10887857	0	0.023806	0.448588	0.100962
Amp	3	10890081	11103164	0	0.016262	0.424253	0.100962
Amp	3	11110819	15090531	0	0.018152	0.414511	0.105769
Amp	3	15091397	15390548	0	0.016262	0.420578	0.100962
Amp	3	15391153	15943186	0	0.013014	0.424673	0.096154
Amp	3	15943665	16585680	0	0.014279	0.409853	0.100962
Amp	3	16586082	21677056	0	0.013014	0.406355	0.100962
Amp	3	21677141	21692624	0	0.016275	0.401462	0.105769
Amp	3	21692742	22203302	0	0.013014	0.390297	0.105769
Amp	3	22205974	23246117	0	0.017657	0.391865	0.110577
Amp	3	23251401	23279364	0	0.021235	0.387869	0.115385
Amp	3	23289821	23379207	0	0.017657	0.391865	0.110577
Amp	3	23384468	23407372	0	0.024176	0.398006	0.115385
Amp	3	23413299	23458736	0	0.017657	0.391865	0.110577
Amp	3	23459622	23496924	0	0.024557	0.399319	0.115385
Amp	3	23497912	23520459	0	0.017657	0.391865	0.110577
Amp	3	23523120	23573197	0	0.025008	0.400876	0.115385
Amp	3	23573830	23616998	0	0.020365	0.399768	0.110577
Amp	3	23619331	23631223	0	0.013014	0.390297	0.105769
Amp	3	23637436	23667216	0	0.019068	0.395102	0.110577
Amp	3	23668852	24334424	0	0.013014	0.390297	0.105769
Amp	3	24334852	24470963	0	0.017978	0.393293	0.110577
Amp	3	24471465	24723868	0	0.013617	0.377608	0.110577
Amp	3	24723951	25224522	0	0.008325	0.358573	0.110577
Amp	3	25229052	25315382	0	0.00336	0.353998	0.105769
Amp	3	25316189	25500149	0	0.007556	0.356278	0.110577
Amp	3	25500252	25563151	0	0.0128	0.388557	0.105769
Amp	3	25563397	25588575	0	0.008888	0.373849	0.105769
Amp	3	25589040	25593599	0	0.01442	0.39465	0.105769
Amp	3	25593614	28406661	0	0.007556	0.366902	0.105769
Amp	3	28410687	28855085	0	0.00336	0.365019	0.100962
Amp	3	28856820	29217260	0	0.009483	0.390064	0.100962
Amp	3	29221889	29636153	0	0.00336	0.365946	0.100962
Amp	3	29636240	29898180	0	0.00201	0.378469	0.096154
Amp	3	29899281	31652418	0	0.006908	0.382566	0.100962
Amp	3	31654219	31823730	0	0.00453	0.373484	0.100962
Amp	3	31830771	32055923	0	0.00201	0.376932	0.096154
Amp	3	32056675	32123545	0	0.003777	0.365946	0.100962
Amp	3	32125446	32241805	0	0.007789	0.365046	0.105769
Amp	3	32251046	32268638	0	0.003777	0.365946	0.100962
Amp	3	32268804	32406086	0	0.008564	0.367961	0.105769
Amp	3	32406384	32787691	0	0.006796	0.37852	0.100962
Amp	3	32788515	33066921	0	0.00201	0.376932	0.096154
Amp	3	33072074	33421175	0	0.006084	0.376642	0.100962
Amp	3	33424051	33825437	0	0.00201	0.375304	0.096154
Amp	3	33825787	34229550	0	0.00653	0.376851	0.100962
Amp	3	34231573	35053777	0	0.00201	0.375304	0.096154
Amp	3	35056491	35065564	0	0.015905	0.397242	0.100962
Amp	3	35070195	35128954	0	0.00201	0.358876	0.096154
Amp	3	35129164	35209322	0	0.006537	0.381121	0.096154
Amp	3	35209519	35552628	0	0.00201	0.362398	0.096154
Amp	3	35552728	35636714	0	0.006404	0.378183	0.096154
Amp	3	35638844	38749301	0	0.00201	0.36001	0.096154
Amp	3	38753087	38770674	0	0.010771	0.412115	0.091346
Amp	3	38771316	41872696	0	0.00201	0.394749	0.086538
Amp	3	42174077	42186337	0	0.012111	0.426062	0.091346
Amp	3	42186540	43083698	0	0.010101	0.434696	0.086538
Amp	3	43083989	43388342	0	0	0.400656	0.081731
Amp	3	43396834	44244523	0	0.007998	0.415154	0.086538
Amp	3	44244773	44390295	0	0.015229	0.416722	0.096154
Amp	3	44392768	44456109	0	0.007231	0.403833	0.091346
Amp	3	44457551	45819442	0	0	0.389112	0.086538
Amp	3	45821312	45846900	0	0.009823	0.408286	0.091346
Amp	3	45849542	46831514	0	0	0.385824	0.086538
Amp	3	46836648	47037515	0	0.010553	0.396047	0.096154
Amp	3	47042909	47624650	0	0	0.370088	0.091346
Amp	3	47630365	47694059	0	0.008084	0.388453	0.096154
Amp	3	47699486	48182371	0	0.009536	0.380077	0.100962
Amp	3	48185972	48199226	0	0.020171	0.418783	0.100962
Amp	3	48201192	48305137	0	0.029343	0.434235	0.105769
Amp	3	48317766	48317766	0	0.020171	0.418783	0.100962
Amp	3	48318943	48339439	0	0.009536	0.373265	0.100962
Amp	3	48340336	48355556	0	0.010803	0.361063	0.105769
Amp	3	48366219	48667162	0	0.023731	0.409672	0.105769
Amp	3	48667793	48692683	0	0.009351	0.371762	0.100962
Amp	3	48693921	48837870	0	0.001267	0.356825	0.096154
Amp	3	48845331	48938394	0	0.009061	0.370533	0.100962
Amp	3	48943537	49796662	0	0.001267	0.356825	0.096154
Amp	3	49796971	50016076	0	0.010008	0.374262	0.100962
Amp	3	50018523	50653750	0	0.001267	0.360112	0.096154
Amp	3	50654741	51633801	0	0	0.373548	0.091346
Amp	3	51634088	51809907	0	0.007286	0.385005	0.096154
Amp	3	51814938	51875014	0	0.02057	0.419291	0.100962
Amp	3	51876286	52218027	0	0.030085	0.436532	0.105769
Amp	3	52218224	52275322	0	0.0168	0.404699	0.100962
Amp	3	52275363	52300577	0	0	0.373548	0.091346
Amp	3	52315396	52381634	0	0.008607	0.390559	0.096154
Amp	3	52383092	52471162	0	0.017633	0.407718	0.100962
Amp	3	52472410	52576484	0	0.008607	0.390559	0.096154
Amp	3	52579318	53554732	0	0	0.373548	0.091346
Amp	3	53557082	54043307	0	0.009664	0.413157	0.091346
Amp	3	54043784	54587973	0	0	0.390982	0.086538
Amp	3	54587987	54615352	0	0.010705	0.417091	0.091346
Amp	3	54620500	61291576	0	0	0.390982	0.086538
Amp	3	61292071	62351077	0	0.004062	0.412639	0.091346
Amp	3	62352860	64037327	0	0	0.392964	0.091346
Amp	3	64045562	64383177	0	0.007984	0.433536	0.091346
Amp	3	64386719	64669681	0	0.019554	0.45566	0.096154
Amp	3	64670004	64671681	0	0.01157	0.407325	0.100962
Amp	3	64676688	64905684	0	0.021147	0.425578	0.105769
Amp	3	64906476	64954466	0	0.009577	0.399944	0.100962
Amp	3	64958927	65072064	0	0	0.379496	0.096154
Amp	3	65072365	66783797	0	0.001335	0.368643	0.100962
Amp	3	66783978	66817805	0	0.009884	0.385188	0.100962
Amp	3	66818185	66864979	0	0.008549	0.396868	0.096154
Amp	3	66865618	69446632	0	0	0.377883	0.091346
Amp	3	69449228	69759487	0	0.001521	0.37422	0.096154
Amp	3	69761692	72244701	0	0	0.386306	0.091346
Amp	3	72246305	72577097	0	0.003061	0.398434	0.091346
Amp	3	72578417	72699635	0	0.010063	0.408358	0.096154
Amp	3	72702694	73666740	0	0.003061	0.398434	0.091346
Amp	3	73668269	73980111	0	0.012676	0.407899	0.100962
Amp	3	73986607	75794356	0	0.003061	0.388316	0.096154
Amp	3	75800481	82771681	0	0	0.380616	0.091346
Amp	3	82773969	82914319	0	0.003542	0.372833	0.096154
Amp	3	82918191	82919463	0	0.014376	0.399801	0.100962
Amp	3	82919993	83779714	0	0.010833	0.40368	0.096154
Amp	3	83783169	95527628	0	0	0.375498	0.091346
Amp	3	95528458	95610382	0	0.001414	0.331015	0.115385
Amp	3	95613506	109879421	0	0	0.340321	0.110577
Amp	3	109880886	109921457	0	0.01268	0.370724	0.115385
Amp	3	109923224	110539789	0	0	0.340842	0.110577
Amp	3	110577736	110682311	0	0.011143	0.366563	0.115385
Amp	3	110690194	113453099	0	0	0.340842	0.110577
Amp	3	113453326	113624126	0	0.006732	0.351816	0.120192
Amp	3	113629283	113744639	0	0.019116	0.377963	0.125
Amp	3	113749515	113953562	0	0.050539	0.478399	0.125
Amp	3	113954871	113955178	0	0.05232	0.481253	0.125
Amp	3	113955736	114243087	0	0.020897	0.381281	0.125
Amp	3	114243644	114315251	0	0.026859	0.391549	0.125
Amp	3	114315767	115310224	0	0.014475	0.365945	0.120192
Amp	3	115323168	115411351	0	0.007743	0.342462	0.120192
Amp	3	115413160	115448330	0	0.017924	0.36177	0.125
Amp	3	115451003	115513180	0	0.025626	0.373492	0.129808
Amp	3	115514704	115854593	0	0.017924	0.36177	0.125
Amp	3	115858547	115971587	0	0.007743	0.342462	0.120192
Amp	3	115972581	116792316	0	0.005962	0.336569	0.120192
Amp	3	116796438	116815740	0	0.027559	0.393634	0.125
Amp	3	116815962	116855358	0	0.005962	0.337919	0.120192
Amp	3	116860709	116867387	0	0	0.331449	0.115385
Amp	3	116875571	116955180	0	0.006598	0.340022	0.120192
Amp	3	116960037	117023131	0	0.013315	0.348316	0.125
Amp	3	117026652	117134296	0	0.006717	0.340418	0.120192
Amp	3	117136613	117820475	0	0	0.331449	0.115385
Amp	3	117823513	118000922	0	0.021172	0.37556	0.120192
Amp	3	118001187	118233662	0	0.023944	0.368217	0.129808
Amp	3	118236234	118258934	0	0.021172	0.375728	0.125
Amp	3	118263144	118278533	0	0.010769	0.356334	0.120192
Amp	3	118279047	119001132	0	0	0.331122	0.115385
Amp	3	119115295	119625524	0	0.007557	0.353155	0.115385
Amp	3	119626122	119774743	0	0	0.337876	0.110577
Amp	3	119776652	119832264	0	0.008383	0.353288	0.115385
Amp	3	119835005	120046178	0	0	0.337876	0.110577
Amp	3	120049210	122172476	0	0.003057	0.338452	0.115385
Amp	3	122172831	122203406	0	0.021132	0.385703	0.120192
Amp	3	122204102	122275011	0	0.003057	0.338452	0.115385
Amp	3	122279258	122293110	0	0.010313	0.348925	0.120192
Amp	3	122293169	122378006	0	0.003057	0.338452	0.115385
Amp	3	122382060	122532727	0	0.005095	0.331658	0.120192
Amp	3	122533357	123737585	0	0.003057	0.338452	0.115385
Amp	3	123738991	124835124	0	0.011549	0.37077	0.115385
Amp	3	124835283	124870082	0	0.024792	0.400381	0.120192
Amp	3	124873138	125130926	0	0.021735	0.40241	0.115385
Amp	3	125131144	125315983	0	0.029286	0.414474	0.120192
Amp	3	125317447	125429632	0	0.035601	0.418705	0.125
Amp	3	125431529	125486286	0	0.029286	0.414474	0.120192
Amp	3	125487553	125673239	0	0.016043	0.38545	0.115385
Amp	3	125674131	126079070	0	0.008492	0.371599	0.110577
Amp	3	126084582	126314679	0	0.021237	0.401559	0.115385
[truncated: 15,442 more rows]
[truncated: 167 more columns]

## Sheet: Supplementary Table 5
Supplementary Table 5. PRLPM riskscore.
[truncated: 636 more rows]

## Sheet: Supplementary Table 6
Supplementary Table 6. The relationship between riskscore and clinical traits.
[truncated: 614 more rows]

[truncated: 2 more sheets: Supplementary Table 7, Supplementary Table 8]
